# Supplementary material for: QTL Mapping of Quality Related Traits in Peanut Using Whole-Genome Resequencing
Source: Research Square preprint supplement (doi:10.21203/rs.3.rs-138961/v1), 2021-01-06
Supplement: Supplementary file 1 [file 9bf2f92b971a4589cacbacab.xlsx]

## Sheet: Sheet1
Supplementary Table S2 The genotype of 7535 bin markers for 329 lines
Bin Marker	Physical location	S181365	S181366	S181367	S181368	S181369	S181372	S181373	S181374	S181375	S181376	S181377	S181378	S181379	S181380	S181381	S181383	S181384	S181386	S181387	S181388	S181389	S181390	S181391	S181392	S181393	S181394	S181395	S181396	S181397	S181398	S181400	S181401	S181402	S181403	S181405	S181406	S181407	S181408	S181409	S181410	S181411	S181412	S181413	S181414	S181415	S181416	S181418	S181419
Chr1_bin1	327307	A	A	A	A	A	B	B	A	A	A	B	A	B	B	A	A	A	B	A	B	A	A	B	B	B	A	A	B	B	B	B	A	B	A	B	B	A	B	B	A	B	A	A	B	B	A	B	A
Chr1_bin2	586170	A	A	A	A	A	B	B	A	A	A	B	A	B	B	A	A	A	B	A	B	A	A	B	B	B	A	A	B	B	B	B	A	B	A	B	B	A	B	B	A	B	A	A	B	B	A	B	A
Chr1_bin3	698604	A	A	A	A	A	B	B	A	A	A	B	A	B	B	A	A	A	B	A	B	A	A	B	B	B	A	A	B	B	B	B	A	B	A	B	B	A	B	B	A	B	A	A	B	B	A	B	A
Chr1_bin4	781765	A	A	A	A	A	B	B	A	A	A	B	A	B	B	A	A	A	B	A	B	A	A	B	B	B	A	A	B	B	B	B	A	B	A	B	B	A	B	B	A	B	A	A	B	B	A	B	A
Chr1_bin5	927956	A	A	A	A	A	B	B	A	A	A	B	A	B	B	A	A	A	B	A	B	A	A	B	B	B	A	A	B	B	B	B	A	B	A	B	B	A	B	B	A	B	A	A	B	B	A	B	A
Chr1_bin6	951903	A	A	A	A	A	B	B	A	A	A	B	A	B	B	A	A	A	B	A	B	A	A	B	B	B	A	A	B	B	B	B	A	B	A	B	B	A	B	B	A	B	A	A	B	B	A	B	A
Chr1_bin7	1131683	A	A	A	A	A	B	B	A	A	A	B	A	B	B	A	A	A	B	A	B	A	A	B	B	B	A	A	B	B	B	B	A	B	A	B	B	A	B	B	A	B	A	A	B	B	A	B	A
Chr1_bin8	1194187	A	A	A	A	A	B	B	A	A	A	B	A	B	B	A	A	A	B	A	B	A	A	B	B	B	A	A	B	B	B	B	B	B	A	B	B	A	B	B	A	B	A	A	B	B	A	B	A
Chr1_bin9	1308762	A	A	A	A	A	B	B	A	A	A	B	A	B	B	A	A	A	B	A	B	A	A	B	B	B	A	A	B	B	B	B	B	B	A	B	B	A	B	B	A	B	A	A	B	B	A	B	A
Chr1_bin10	1442823	A	A	A	A	A	B	B	A	A	A	B	A	B	B	A	A	A	B	A	B	A	A	B	B	B	A	A	B	B	B	B	B	B	A	B	B	A	B	B	A	B	A	A	B	B	A	B	A
Chr1_bin11	1452898	A	A	A	A	A	B	B	A	A	A	B	A	B	B	A	A	A	B	A	B	A	A	B	B	B	A	A	B	B	B	B	B	B	A	B	B	A	B	B	A	B	A	A	B	B	A	B	A
Chr1_bin12	1588740	A	A	A	A	A	B	B	A	A	A	B	A	B	B	A	A	A	B	A	B	A	A	B	B	B	A	A	B	B	B	B	B	B	A	B	B	A	B	B	A	B	A	A	B	B	A	B	A
Chr1_bin13	1688288	A	A	A	A	A	B	B	A	A	A	B	A	B	B	A	A	A	B	A	B	A	A	B	B	B	A	A	B	B	B	B	B	B	A	B	B	A	B	B	A	B	A	A	B	B	A	B	A
Chr1_bin14	1801254	A	A	A	A	A	B	B	A	A	A	B	A	B	B	A	A	A	B	A	B	A	A	B	B	B	A	A	B	B	B	B	B	B	A	B	B	A	B	B	A	B	A	A	B	B	A	B	A
Chr1_bin15	1968616	A	A	A	A	A	B	B	A	A	A	B	A	B	B	A	A	A	B	A	B	A	A	B	B	B	A	A	B	B	B	B	B	B	A	B	B	A	B	B	A	B	A	A	B	B	A	B	A
Chr1_bin16	2087460	A	A	A	A	A	B	B	A	A	A	B	A	B	B	A	A	A	B	A	B	A	A	B	B	B	A	A	B	B	B	B	B	B	A	B	B	A	B	B	A	B	A	A	B	B	A	B	A
Chr1_bin17	2229831	A	A	A	A	A	B	B	A	A	A	B	A	B	B	A	A	A	B	A	B	A	A	B	B	B	A	A	B	B	B	B	B	B	A	B	B	A	B	B	A	B	A	A	B	B	A	B	A
Chr1_bin18	2298204	A	A	A	A	A	B	B	A	A	A	B	A	B	B	A	A	A	B	A	B	A	A	B	B	B	A	A	B	B	B	B	B	B	A	B	B	A	B	B	A	B	A	A	B	B	A	B	A
Chr1_bin19	2422895	A	A	A	A	A	B	B	A	A	A	B	A	B	B	A	A	A	B	A	B	A	A	B	B	B	A	A	B	B	B	B	B	B	A	B	B	A	B	B	A	B	B	A	B	B	A	B	A
Chr1_bin20	2513965	A	A	A	B	A	B	B	A	A	A	B	A	B	B	A	A	A	B	A	B	A	A	B	B	B	A	A	B	B	B	B	B	B	A	B	B	A	B	B	A	B	B	A	B	B	A	B	A
Chr1_bin21	2633589	A	A	A	B	A	B	B	A	A	A	B	A	B	B	A	A	A	B	A	B	A	A	B	B	B	A	A	B	B	B	B	B	B	A	B	B	A	B	B	A	B	B	A	B	B	A	B	A
Chr1_bin22	2715538	A	A	A	B	A	B	B	A	A	A	B	A	B	B	A	A	A	B	A	B	A	A	B	B	B	A	A	B	B	B	B	B	B	A	A	B	A	B	B	A	B	B	A	B	B	A	B	A
Chr1_bin23	2777876	A	A	A	B	A	B	B	A	A	A	B	A	B	B	A	A	A	B	A	B	A	A	B	B	B	A	A	B	B	B	B	B	B	A	A	B	A	B	B	A	B	B	A	B	B	A	B	A
Chr1_bin24	2946013	A	A	A	B	A	B	B	A	A	A	B	A	B	B	A	A	A	B	A	B	A	A	B	B	B	A	A	B	B	B	B	B	B	A	A	B	A	B	B	A	B	B	A	B	B	A	B	A
Chr1_bin25	3008366	A	A	A	B	A	B	B	A	A	A	B	A	B	B	A	A	A	B	A	B	A	A	B	B	B	A	A	B	B	B	B	B	B	A	A	B	A	B	B	A	B	B	A	B	B	A	B	A
Chr1_bin26	3133189	A	A	A	B	A	B	B	A	A	A	B	A	B	B	A	A	A	B	A	B	A	A	B	B	B	A	A	B	B	B	B	B	B	A	A	B	A	B	B	A	B	B	A	B	A	A	B	A
Chr1_bin27	3211016	A	A	A	B	A	B	B	A	A	A	B	A	B	B	A	B	A	B	A	B	A	A	B	B	B	A	A	B	B	B	B	B	B	A	A	B	A	B	B	A	B	B	A	B	A	A	B	A
Chr1_bin28	3343250	A	A	A	B	A	B	B	A	A	A	B	A	B	B	A	B	B	B	A	B	A	A	B	B	B	A	A	B	B	B	B	B	B	A	A	B	A	B	B	A	B	B	A	B	A	A	B	A
Chr1_bin29	3420317	A	A	A	B	A	B	B	A	A	A	B	A	B	B	A	B	B	B	A	B	A	A	B	A	B	A	A	B	B	B	B	B	B	A	A	B	A	B	B	A	B	B	A	B	A	A	B	A
Chr1_bin30	3549178	A	A	A	B	A	B	B	A	A	A	B	A	B	B	A	B	B	A	A	B	A	A	B	A	B	A	A	B	B	B	B	B	B	A	A	B	A	B	B	A	B	B	A	B	A	A	B	A
Chr1_bin31	3627091	A	A	A	B	A	B	B	A	A	A	B	B	B	B	A	B	B	A	A	B	A	A	B	A	B	A	A	B	B	B	B	B	B	A	A	B	A	B	B	A	B	B	A	B	A	A	B	A
Chr1_bin32	3747083	A	A	A	B	A	B	B	A	A	B	B	B	B	B	A	B	B	A	A	B	A	A	B	A	B	A	A	B	B	B	B	B	B	A	A	B	A	B	B	A	B	B	A	B	A	A	B	A
Chr1_bin33	3831774	A	A	A	B	A	B	B	A	A	B	B	B	B	B	A	B	B	A	A	B	A	A	B	A	B	A	A	B	B	B	B	B	B	A	A	B	A	B	B	A	B	B	A	B	A	A	B	A
Chr1_bin34	3865420	A	A	A	B	A	B	B	A	A	B	B	B	B	B	A	B	B	A	A	B	A	A	B	A	B	A	A	B	B	B	B	B	B	A	A	B	A	B	B	A	B	B	A	B	A	A	B	A
Chr1_bin35	3997141	A	A	A	B	A	B	B	A	A	B	B	B	B	B	A	B	B	A	A	B	A	A	B	A	B	A	A	B	B	B	B	B	B	A	A	B	A	B	B	A	B	B	A	B	A	A	B	A
Chr1_bin36	4124606	A	A	A	B	A	B	B	A	A	B	B	B	B	B	A	B	B	A	A	B	A	A	B	A	B	A	A	B	B	B	B	B	B	A	A	B	A	B	B	A	B	B	A	B	A	A	B	A
Chr1_bin37	4249581	A	A	A	B	A	B	B	A	A	B	B	B	B	B	A	B	B	A	A	B	A	A	B	A	B	A	A	B	B	B	B	B	B	A	A	B	A	B	B	A	B	B	A	B	A	A	B	A
Chr1_bin38	4339422	A	A	A	B	A	B	B	A	A	B	B	B	B	B	A	B	B	A	A	B	A	A	B	A	B	A	A	B	B	B	B	B	B	B	A	B	A	B	B	A	B	B	A	B	A	A	B	A
Chr1_bin39	4435624	A	A	A	B	A	B	B	A	A	B	B	B	B	B	A	B	B	A	A	B	A	A	B	A	B	A	A	A	B	B	B	B	B	B	A	B	A	B	B	A	B	B	A	B	A	A	B	A
Chr1_bin40	4529085	A	B	A	B	A	B	B	A	A	B	B	B	B	B	A	B	B	A	A	B	A	A	B	A	B	A	A	A	B	B	B	B	B	B	A	B	A	B	B	A	B	B	A	B	B	A	B	A
Chr1_bin41	4622457	A	B	A	B	A	B	B	A	A	B	B	B	B	A	A	B	B	A	A	B	A	A	B	A	B	A	A	A	B	B	B	B	B	B	A	B	A	B	B	A	B	B	A	B	B	A	B	A
Chr1_bin42	4835464	A	B	A	B	A	B	B	A	A	B	B	B	B	A	A	B	B	A	A	B	A	A	B	A	B	A	A	A	B	B	B	B	B	B	A	B	A	B	B	A	B	B	A	B	B	A	B	A
Chr1_bin43	4923517	A	B	A	B	A	B	B	B	A	B	B	B	B	A	A	B	B	A	A	B	A	A	B	A	B	A	A	A	B	B	B	B	B	B	A	B	A	B	B	A	B	B	A	B	B	A	B	A
Chr1_bin44	5011775	A	B	A	B	A	B	B	B	A	B	B	B	B	A	A	B	B	A	A	B	A	A	B	A	B	A	A	A	B	B	B	B	B	B	A	B	A	B	B	A	B	B	A	B	B	A	B	A
Chr1_bin45	5129744	A	B	A	B	A	B	B	B	A	B	A	B	B	A	A	B	B	A	A	B	A	A	B	A	B	A	A	A	B	B	B	B	B	B	A	B	A	B	B	A	B	B	A	B	B	A	B	A
Chr1_bin46	5340989	A	B	A	B	A	B	B	B	A	B	A	B	B	A	A	B	B	A	B	B	A	A	B	A	B	A	A	A	B	B	B	B	B	B	A	B	A	B	B	A	B	B	A	B	B	A	B	A
Chr1_bin47	5441935	A	B	A	B	A	B	B	B	A	B	A	B	B	A	A	B	B	A	B	B	B	A	B	A	B	A	A	A	B	B	B	B	B	B	A	B	A	B	B	A	B	B	A	B	B	A	B	A
Chr1_bin48	5544399	A	B	A	B	A	B	B	B	A	B	A	B	B	A	A	B	B	A	B	B	B	A	B	A	B	A	A	A	B	B	B	B	B	B	A	B	A	B	A	A	B	B	A	B	B	A	B	A
Chr1_bin49	5604221	A	B	A	B	A	B	B	B	A	B	A	B	B	A	A	B	B	A	B	B	B	A	B	A	B	A	A	A	B	B	B	B	B	B	A	B	A	B	A	A	B	B	A	B	B	A	B	A
Chr1_bin50	5725708	A	B	A	B	A	B	B	B	A	B	A	B	B	A	A	B	B	A	B	B	B	A	B	A	B	A	A	A	B	B	B	B	B	B	A	B	A	B	A	A	B	B	A	B	B	A	B	A
Chr1_bin51	5845392	A	B	A	B	A	B	B	B	A	B	A	B	B	A	A	B	B	A	B	B	B	A	B	A	B	A	A	A	B	B	B	B	B	B	A	B	A	B	A	A	B	B	A	B	B	A	B	A
Chr1_bin52	5906644	A	B	A	B	A	B	B	B	A	B	A	B	B	A	A	B	B	A	B	B	B	A	B	A	B	A	A	A	B	B	B	B	B	B	A	B	A	B	A	A	B	B	A	B	B	A	B	A
Chr1_bin53	6199886	A	B	A	B	A	B	B	B	A	B	A	B	B	A	A	B	B	A	B	B	B	A	B	A	B	A	A	A	B	B	B	B	B	B	A	B	A	B	A	A	B	B	A	B	B	A	B	A
Chr1_bin54	6339147	A	B	A	B	A	B	B	B	A	B	A	B	B	A	A	B	B	A	B	B	B	A	B	A	B	A	A	A	B	A	B	B	B	B	A	B	A	B	A	A	B	B	A	B	B	A	B	A
Chr1_bin55	6398705	A	B	A	B	A	B	B	B	A	B	A	B	B	A	A	B	B	A	B	B	B	A	B	A	B	A	A	A	B	A	B	B	B	B	A	B	A	B	A	A	B	B	A	B	A	A	B	A
Chr1_bin56	6535978	A	B	A	B	A	B	B	B	A	B	A	B	B	A	A	B	B	A	B	B	B	A	B	A	B	A	A	A	B	A	B	B	B	B	A	B	A	B	A	A	B	B	A	B	A	A	B	A
Chr1_bin57	6649697	A	B	A	B	A	B	B	B	A	B	A	B	B	A	A	B	B	A	B	B	B	A	B	A	B	A	A	A	B	A	B	B	B	B	A	B	A	B	A	A	B	B	A	B	A	A	B	A
Chr1_bin58	6832830	A	B	A	B	A	B	B	B	A	B	A	B	B	A	A	B	B	A	B	B	B	A	B	A	B	A	A	A	B	A	B	B	B	B	A	B	A	B	A	A	B	B	A	B	A	A	B	A
Chr1_bin59	6906295	A	B	A	B	A	B	B	B	A	B	A	B	B	A	A	B	B	A	B	B	B	A	B	A	B	A	A	A	B	A	B	B	B	B	A	B	A	B	A	A	B	B	A	B	A	A	B	A
Chr1_bin60	7007950	A	B	A	B	A	B	B	B	A	B	A	B	B	A	A	B	B	A	B	B	B	A	B	A	B	A	A	A	B	A	B	B	B	B	A	B	A	B	A	A	B	B	A	A	A	A	B	A
Chr1_bin61	7249982	A	B	A	B	A	B	B	B	A	B	A	B	B	A	A	B	B	A	B	B	B	A	B	A	B	A	A	A	B	A	B	B	B	B	A	B	A	B	A	A	B	B	A	A	A	A	B	A
Chr1_bin62	7340677	A	B	A	B	A	B	B	B	A	B	A	B	B	A	A	B	B	A	B	B	B	A	B	A	B	A	A	A	B	A	B	B	B	B	A	B	A	B	A	A	B	B	A	A	A	A	B	A
Chr1_bin63	7371310	A	B	A	B	A	B	B	A	A	B	A	B	B	A	A	B	B	A	B	B	B	A	B	A	B	A	A	A	A	A	B	B	B	B	A	B	A	B	A	A	B	B	A	A	A	A	B	A
Chr1_bin64	7485963	A	B	A	B	A	B	B	A	A	B	A	B	B	A	A	B	B	A	B	B	B	A	B	A	B	A	A	A	A	A	B	B	B	B	A	B	A	B	A	A	B	B	A	A	A	A	B	A
Chr1_bin65	7745090	A	B	A	B	A	B	B	A	A	B	A	B	B	A	A	B	B	A	B	B	B	A	B	A	B	A	A	A	A	A	B	B	B	B	A	B	A	B	A	A	B	B	A	A	A	A	B	A
Chr1_bin66	7829650	A	B	A	B	A	B	B	A	A	B	A	B	B	A	A	B	B	A	B	B	B	A	B	A	B	A	A	A	A	A	B	B	B	B	A	B	A	B	A	A	B	B	A	A	A	A	B	A
Chr1_bin67	7947088	A	B	A	B	A	B	B	A	A	B	A	B	B	A	A	B	B	A	B	B	B	A	B	A	B	A	A	A	A	A	B	B	B	B	A	B	A	B	A	A	B	B	A	A	A	A	B	A
Chr1_bin68	8041037	A	B	A	B	A	B	B	A	A	B	A	B	B	A	A	B	B	A	B	B	B	A	B	A	B	A	A	A	A	A	B	B	B	B	A	B	A	B	A	A	B	B	A	A	A	A	B	A
Chr1_bin69	8348672	A	B	A	B	A	B	B	A	A	B	A	B	B	A	A	B	B	A	B	B	B	B	B	A	B	A	A	A	A	A	B	B	B	B	A	B	A	B	A	A	B	B	A	A	A	A	B	A
Chr1_bin70	8541923	A	B	A	B	A	B	B	A	A	B	A	B	B	A	A	B	B	A	B	B	B	B	B	A	B	A	A	A	A	A	B	B	B	B	A	B	A	B	A	A	B	B	A	A	A	A	B	A
Chr1_bin71	8577975	A	B	A	B	A	B	B	A	A	B	A	B	B	A	A	B	B	A	B	B	B	B	B	A	B	A	A	A	A	A	B	B	B	B	A	B	A	B	A	A	B	B	A	A	A	A	B	A
Chr1_bin72	8741571	A	B	A	B	A	B	B	A	A	B	A	B	B	A	A	B	B	A	B	B	B	B	B	A	B	A	A	A	A	A	B	B	B	B	A	B	A	B	A	A	B	B	A	A	A	B	B	A
Chr1_bin73	8804432	A	B	A	B	A	B	B	A	A	B	A	B	B	A	A	B	B	A	B	B	B	B	B	A	B	A	A	A	A	A	B	B	B	B	A	B	A	B	A	A	B	B	A	A	A	B	B	A
Chr1_bin74	9125345	A	B	A	B	A	B	B	A	A	B	A	B	B	A	A	B	B	A	B	B	B	B	B	A	B	A	A	A	A	A	B	B	B	B	A	B	A	B	A	A	B	B	A	A	A	B	B	A
Chr1_bin75	9377860	A	B	A	B	A	B	B	A	A	B	A	B	B	A	A	B	B	A	B	B	B	B	B	A	B	A	B	A	A	A	B	B	B	B	A	B	A	B	A	A	B	B	A	A	A	B	B	A
Chr1_bin76	9474324	A	B	A	B	A	B	B	A	A	B	A	B	B	A	A	B	B	A	B	B	B	B	B	A	B	A	B	A	A	A	B	B	B	B	A	B	A	B	A	A	A	B	A	A	A	B	B	A
Chr1_bin77	9807005	A	B	A	B	A	B	B	A	A	B	A	B	B	A	A	B	B	A	B	B	B	B	B	A	B	A	B	A	A	A	B	B	B	B	A	B	A	B	A	A	A	B	A	A	A	B	B	A
Chr1_bin78	9927989	A	B	A	B	A	B	B	A	A	B	A	B	B	A	A	B	B	A	B	B	B	B	B	A	B	A	B	A	A	A	B	B	B	B	A	B	A	B	A	A	A	B	A	A	A	B	B	A
Chr1_bin79	10040467	A	B	A	B	A	B	B	A	A	B	A	B	B	A	A	B	B	A	B	B	B	B	B	A	B	A	B	A	A	A	B	B	B	B	A	B	A	B	A	A	A	B	A	A	A	B	B	A
Chr1_bin80	10142565	A	B	A	B	A	B	B	A	A	B	A	B	B	A	A	B	B	A	B	B	B	B	B	A	B	A	B	A	A	A	B	B	B	A	A	B	A	B	A	A	A	B	A	A	A	B	B	A
Chr1_bin81	10206781	A	B	A	B	A	B	B	A	A	B	A	B	B	A	A	B	B	A	B	B	B	B	B	A	B	A	B	A	A	A	B	B	B	A	A	B	A	B	A	A	A	B	A	A	A	B	B	A
Chr1_bin82	10346251	A	B	A	B	A	B	B	A	A	B	A	B	B	A	A	B	B	A	B	B	B	B	B	A	B	A	B	A	A	A	B	B	B	A	A	B	A	B	A	A	A	B	A	A	A	B	B	A
Chr1_bin83	10398749	A	B	A	B	A	B	B	A	A	B	A	B	B	A	A	B	B	A	B	B	B	B	B	A	B	A	B	A	A	A	B	B	B	A	A	B	A	B	A	A	A	B	A	A	A	B	B	A
Chr1_bin84	10513935	A	B	A	B	A	B	B	A	A	B	A	B	B	A	A	B	B	A	B	B	B	B	B	A	B	A	B	A	A	A	B	B	B	A	A	B	A	B	A	A	A	B	A	A	A	B	B	A
Chr1_bin85	10567797	A	B	A	B	A	B	B	A	A	B	A	B	A	A	A	B	B	A	B	B	B	B	B	A	B	A	B	A	A	A	B	B	B	A	A	B	A	B	A	A	A	B	A	A	A	B	B	A
Chr1_bin86	10737162	A	B	A	B	A	B	B	A	A	B	A	B	A	A	A	B	B	A	B	B	B	B	B	A	B	A	B	A	A	A	B	B	B	A	A	B	A	B	A	A	A	B	A	A	A	B	B	A
Chr1_bin87	10839478	A	B	A	B	A	B	B	A	A	B	A	B	A	A	A	B	B	A	B	B	B	B	B	A	B	A	B	A	A	A	B	B	B	A	A	B	A	B	A	A	A	B	A	A	A	B	B	A
Chr1_bin88	10902013	A	B	A	B	A	B	B	A	A	B	A	B	A	A	A	B	B	A	B	B	B	B	B	A	B	A	B	A	A	A	B	B	B	A	A	B	A	B	A	A	A	B	A	A	A	B	B	A
Chr1_bin89	10991756	A	B	A	B	A	B	B	A	A	B	A	B	A	A	A	B	B	A	B	B	B	B	B	A	B	A	B	A	A	A	B	B	B	A	A	B	A	B	A	A	A	B	A	A	A	B	B	A
Chr1_bin90	11180962	A	B	A	B	A	B	B	A	A	B	A	B	A	A	A	B	B	A	B	B	B	B	B	A	B	A	B	A	A	A	B	B	B	A	A	B	A	B	A	A	A	B	A	A	A	B	B	A
Chr1_bin91	11331867	A	B	A	B	A	H	B	A	A	B	A	B	A	A	A	B	B	A	B	B	B	B	B	A	B	A	B	A	A	A	B	B	B	A	A	B	A	B	A	A	A	B	A	A	A	B	B	A
Chr1_bin92	11472049	A	B	A	B	A	H	B	A	A	B	A	B	A	A	A	B	B	A	B	B	B	B	B	A	A	A	B	A	A	A	B	B	B	A	A	B	A	B	A	A	A	B	A	A	A	B	B	A
Chr1_bin93	11732591	A	B	A	B	A	H	B	A	A	B	A	B	A	A	A	B	B	A	B	B	B	B	B	A	A	A	B	A	A	A	B	B	B	A	A	B	A	B	A	A	A	B	A	A	A	B	B	A
Chr1_bin94	11814362	A	B	A	B	A	H	B	A	A	B	A	B	A	A	A	B	B	A	B	B	B	B	B	A	A	A	B	A	A	A	B	B	B	A	A	B	A	B	A	A	A	B	A	A	A	B	B	A
Chr1_bin95	11936617	A	B	A	B	A	H	A	A	A	B	A	B	A	A	A	B	B	A	B	B	B	B	B	B	A	A	B	A	A	A	B	B	B	A	A	B	A	B	A	A	A	B	A	A	A	B	B	A
Chr1_bin96	12026489	A	B	A	B	A	H	A	A	A	B	A	B	A	A	A	B	B	A	B	B	B	B	B	B	A	A	B	A	A	A	B	B	B	A	A	B	A	B	A	A	A	B	A	A	A	B	B	A
Chr1_bin97	12068306	A	B	A	B	A	H	A	A	A	B	A	B	A	A	A	B	B	A	B	B	B	B	B	B	A	A	B	A	A	A	B	B	B	A	A	B	A	B	A	A	A	B	A	A	A	B	B	A
Chr1_bin98	12238395	A	B	A	B	A	H	A	A	A	B	A	B	A	A	A	B	B	A	B	B	B	B	B	B	A	A	B	A	A	A	B	B	B	A	A	B	A	B	A	A	A	B	A	A	A	B	B	A
Chr1_bin99	12341898	A	B	A	B	A	H	A	A	A	B	A	B	A	A	A	B	B	A	B	B	B	B	B	B	A	A	B	A	A	A	B	B	B	A	A	B	A	B	A	A	A	B	A	A	A	B	B	A
Chr1_bin100	12406557	A	B	A	B	A	H	A	A	A	B	A	B	A	A	A	B	B	A	B	B	B	B	B	B	A	A	B	A	A	A	B	B	B	A	A	B	A	B	A	A	A	B	A	A	A	B	B	A
Chr1_bin101	12495830	A	B	A	B	A	H	A	A	A	B	A	B	A	A	A	B	B	A	B	B	B	B	B	B	A	A	B	A	A	A	B	B	B	A	A	B	A	B	A	A	A	B	A	A	A	B	B	A
Chr1_bin102	12573918	A	B	A	B	A	H	A	A	A	B	A	B	A	A	A	B	B	A	B	B	B	B	B	B	A	A	B	A	A	A	B	B	B	A	A	B	A	B	A	A	A	B	A	A	A	B	B	A
Chr1_bin103	12687965	A	B	A	B	A	A	A	A	A	B	A	B	A	A	A	B	B	A	B	B	B	B	B	B	A	A	B	A	A	A	B	B	B	A	A	B	A	B	A	A	A	B	A	A	A	B	B	A
Chr1_bin104	13008724	A	B	A	B	A	A	A	A	A	B	A	B	A	A	A	B	B	A	B	B	B	B	B	B	A	A	B	A	A	A	B	B	B	A	A	B	A	B	A	A	A	B	A	A	A	B	B	A
Chr1_bin105	13192806	A	B	A	B	A	A	A	A	A	B	A	B	A	A	A	B	B	A	B	B	B	B	B	B	A	A	B	A	A	A	B	B	B	A	A	B	A	B	A	A	A	B	A	A	A	B	B	A
Chr1_bin106	13397750	A	B	A	B	A	A	A	A	A	B	A	B	A	A	A	B	B	A	B	B	B	B	B	B	A	A	B	A	A	A	B	B	B	A	A	B	A	B	A	A	A	B	A	A	A	B	B	A
Chr1_bin107	14197501	A	B	A	B	A	A	A	A	A	B	A	B	A	A	A	B	B	A	B	B	B	B	B	B	A	A	B	A	A	A	B	B	B	A	A	B	A	B	A	A	A	B	A	A	A	B	B	A
Chr1_bin108	14495051	A	B	A	B	A	A	A	A	A	B	A	B	A	A	A	B	B	A	B	B	B	B	B	B	A	A	B	A	A	A	B	B	B	A	A	B	A	B	A	A	A	B	A	A	A	B	B	A
Chr1_bin109	14800501	A	B	A	B	A	A	A	A	A	B	A	B	A	A	A	B	B	A	B	B	B	B	B	B	A	A	B	A	A	A	B	B	B	A	A	B	A	B	A	A	A	B	A	A	A	B	B	A
Chr1_bin110	15162025	A	B	A	B	A	A	A	A	A	B	A	B	A	A	A	B	B	A	B	B	B	B	B	B	A	A	B	A	A	A	B	B	B	A	A	B	A	B	A	A	A	B	A	A	A	B	B	A
Chr1_bin111	15590527	A	B	A	B	A	A	A	A	A	B	A	B	A	A	A	B	B	A	B	B	B	B	B	B	A	A	B	A	A	A	B	B	B	A	A	B	A	B	A	A	A	B	A	A	A	B	B	A
Chr1_bin112	15796891	A	B	A	B	A	A	A	A	A	B	A	B	A	A	A	B	B	A	B	B	B	B	B	B	A	A	B	A	A	A	B	B	B	A	A	B	A	B	A	A	A	B	A	A	A	B	B	A
Chr1_bin113	16557834	A	B	A	B	A	A	A	A	A	B	A	B	A	A	A	B	B	A	B	B	B	B	B	B	A	A	B	A	A	A	B	B	B	A	A	B	A	B	A	A	A	B	A	A	A	B	B	A
Chr1_bin114	16996735	A	B	A	B	A	A	A	A	A	B	A	B	A	A	A	B	B	A	B	B	B	B	B	B	A	A	B	A	A	A	B	B	B	A	A	B	A	B	A	A	A	B	A	A	A	B	B	A
Chr1_bin115	17070613	A	B	A	B	A	A	A	A	A	B	A	B	A	A	A	B	B	A	B	B	B	B	B	B	A	A	B	A	A	A	B	B	B	A	A	B	A	B	A	A	A	B	A	A	A	B	B	A
Chr1_bin116	17305535	A	B	A	B	A	A	A	A	A	B	A	B	A	A	A	B	B	A	B	B	B	B	B	B	A	A	B	A	A	A	B	B	B	A	A	B	A	B	A	A	A	B	A	A	A	B	B	A
Chr1_bin117	17945708	A	B	A	B	A	A	A	A	A	B	A	B	A	A	A	B	B	A	B	B	B	B	B	B	A	A	B	A	A	A	B	B	B	A	A	B	A	B	A	A	A	B	A	A	A	B	B	A
Chr1_bin118	19015208	A	B	A	B	A	A	A	A	A	B	A	B	A	A	A	B	B	A	B	B	B	B	B	B	A	A	B	A	A	A	B	B	B	A	A	B	A	B	A	A	A	B	A	A	A	B	B	A
Chr1_bin119	19861039	A	B	A	B	A	A	A	A	A	B	A	B	A	A	A	B	B	A	B	B	B	B	B	B	A	A	B	A	A	A	B	B	B	A	A	B	A	B	A	A	A	B	A	A	A	B	B	A
Chr1_bin120	19984480	A	B	A	B	A	A	A	A	A	B	A	B	A	A	A	B	B	A	B	B	B	B	B	B	A	A	B	A	A	A	B	B	B	A	A	B	A	B	A	A	A	B	A	A	A	B	B	A
Chr1_bin121	20325518	A	B	A	B	A	A	A	A	A	B	A	B	A	A	A	B	B	A	B	B	B	B	B	B	A	A	B	A	A	A	B	B	B	A	A	B	A	B	A	A	A	B	A	A	A	B	B	A
Chr1_bin122	20717628	A	B	A	B	A	A	A	A	A	B	A	B	A	A	A	B	B	A	B	B	B	B	B	B	A	A	B	A	A	A	B	B	B	A	A	B	A	B	A	A	A	B	A	A	A	B	B	A
Chr1_bin123	20941911	A	B	A	B	A	A	A	A	A	B	A	B	A	A	A	B	B	A	B	B	B	B	B	B	A	A	B	A	A	A	B	B	B	A	A	B	A	B	A	A	A	B	A	A	A	B	B	A
Chr1_bin124	21406112	A	B	A	B	A	A	A	A	A	B	A	B	A	A	A	B	B	A	B	B	B	B	B	B	A	A	B	A	A	A	B	B	B	A	A	B	A	B	A	A	A	B	A	A	A	B	B	A
Chr1_bin125	21899708	A	B	A	B	A	A	A	A	A	B	A	B	A	A	A	B	B	A	B	B	B	B	B	B	A	A	B	A	A	A	B	B	B	A	A	B	A	B	A	A	A	B	A	A	A	B	B	A
Chr1_bin126	22995804	A	B	A	B	A	A	A	A	A	B	A	B	A	A	A	B	B	A	B	B	B	B	B	B	A	A	B	A	A	A	B	B	B	A	A	B	A	B	A	A	A	B	A	A	A	B	B	A
Chr1_bin127	23537154	A	B	A	B	A	A	A	A	A	B	A	B	A	A	A	B	B	A	B	B	B	B	B	B	A	A	B	A	A	A	B	B	B	A	A	B	A	B	A	A	A	B	A	A	A	B	B	A
Chr1_bin128	23668049	A	B	A	B	A	A	A	A	A	B	A	B	A	A	A	B	B	A	B	B	B	B	B	B	A	A	B	A	A	A	B	B	B	A	A	B	A	B	A	A	A	B	A	A	A	B	B	A
Chr1_bin129	25441027	A	B	A	B	A	A	A	A	A	B	A	B	A	A	A	B	B	A	B	B	B	B	B	B	A	A	B	A	A	A	B	B	B	A	A	B	A	B	A	A	A	B	A	A	A	B	B	A
Chr1_bin130	25656898	A	B	A	B	A	A	A	A	A	B	A	B	A	A	A	B	B	A	B	B	B	B	B	B	A	A	B	A	A	A	B	B	B	A	A	B	A	B	A	A	A	B	A	A	A	B	B	A
Chr1_bin131	28885116	A	B	A	B	A	A	A	A	A	B	A	B	A	A	A	B	B	A	B	B	B	B	B	B	A	A	B	A	A	A	B	B	B	A	A	B	A	B	A	A	A	B	A	A	A	B	B	A
Chr1_bin132	29057830	A	B	A	B	A	A	A	A	A	B	A	B	A	A	A	B	B	A	B	B	B	B	B	B	A	A	B	A	A	A	B	B	B	A	A	B	A	B	A	A	A	B	A	A	A	B	B	A
Chr1_bin133	29392449	A	B	A	B	A	A	A	A	A	B	A	B	A	A	A	B	B	A	B	B	B	B	B	B	A	A	B	A	A	A	B	B	B	A	A	B	A	B	A	A	A	B	A	A	A	B	B	A
Chr1_bin134	29942882	A	B	A	B	A	A	A	A	B	B	A	B	A	A	A	B	B	A	B	B	B	B	B	B	A	A	B	A	A	A	B	B	B	A	A	B	A	B	A	A	A	B	A	A	A	B	B	A
Chr1_bin135	29950822	A	B	A	B	A	A	A	A	B	B	A	B	A	A	A	B	B	A	B	B	B	B	B	B	A	A	B	A	A	A	B	B	B	A	A	B	A	B	A	A	A	B	A	A	A	B	B	A
Chr1_bin136	30244053	A	B	A	B	A	A	A	A	B	B	A	B	A	A	A	B	B	A	B	B	B	B	B	B	A	A	B	A	A	A	B	B	B	A	A	B	A	B	A	A	A	B	A	A	A	B	B	B
Chr1_bin137	31331811	A	B	A	B	A	A	A	A	B	B	A	B	A	A	A	B	B	A	B	B	B	B	B	B	A	A	B	A	A	A	B	B	B	A	A	B	A	B	A	A	A	B	A	A	A	B	B	B
Chr1_bin138	31991423	A	B	A	B	A	A	A	A	B	B	A	B	A	A	A	B	B	A	B	B	B	B	B	B	A	A	B	A	A	A	B	B	B	A	A	B	A	B	A	A	A	B	A	A	A	B	B	B
Chr1_bin139	32145816	A	B	A	B	A	A	A	A	B	B	A	B	A	A	A	B	B	A	B	B	B	B	B	B	A	A	B	A	A	A	B	B	B	A	A	B	A	B	A	A	A	B	A	A	A	B	B	B
Chr1_bin140	35305886	A	B	A	B	A	A	A	A	B	B	A	B	A	A	A	B	B	A	B	B	B	B	B	B	A	A	B	A	A	A	B	B	B	A	A	B	A	A	A	A	A	B	A	A	A	B	B	B
Chr1_bin141	35489848	A	B	A	B	A	A	A	A	B	B	A	B	A	A	A	B	B	A	B	B	B	B	B	B	A	A	B	A	A	A	B	B	B	A	A	B	A	A	A	A	A	B	A	A	A	B	B	B
Chr1_bin142	36348831	A	B	A	B	A	A	A	A	B	B	A	B	A	A	A	B	B	A	B	B	B	B	B	B	A	A	B	A	A	A	B	B	B	A	A	B	A	A	A	A	A	B	A	A	A	B	B	B
Chr1_bin143	36447651	A	B	A	B	A	A	A	A	B	B	A	B	A	A	A	B	B	A	B	B	B	B	B	B	A	A	B	A	A	A	B	B	B	A	A	B	A	A	A	A	A	B	A	A	A	B	B	B
Chr1_bin144	36644683	A	B	A	B	A	A	A	A	B	B	A	B	A	A	A	B	B	A	B	B	B	B	B	B	A	A	B	A	A	A	B	B	B	A	A	B	A	A	A	A	A	B	A	A	A	B	B	B
Chr1_bin145	37127707	A	B	A	B	A	A	A	A	B	B	A	B	A	A	A	B	B	A	B	B	B	B	B	B	A	A	B	A	A	A	B	B	B	A	A	B	A	A	A	A	A	B	A	A	A	B	B	B
Chr1_bin146	37185799	A	B	A	B	A	A	A	A	B	B	A	B	A	A	A	B	B	A	B	B	B	B	B	B	A	A	B	A	A	A	B	B	B	A	A	B	A	A	A	A	A	B	A	A	A	B	B	B
Chr1_bin147	38096344	A	B	A	B	A	A	A	A	B	B	A	B	A	A	A	B	B	A	B	B	B	B	B	B	A	A	B	B	A	A	B	B	B	A	A	B	A	A	A	A	A	B	A	A	A	B	B	B
Chr1_bin148	38485341	A	B	A	B	A	A	A	A	B	B	A	B	A	A	A	B	B	A	B	B	B	B	B	B	A	A	B	B	A	A	B	B	B	A	A	B	A	A	A	A	A	B	A	A	A	B	B	B
Chr1_bin149	38653225	A	B	A	B	A	A	A	A	B	B	A	B	A	A	A	B	B	A	B	B	B	B	B	B	A	A	B	B	A	A	B	B	B	A	A	B	A	A	A	A	A	B	A	A	A	B	B	B
Chr1_bin150	39899484	A	B	A	B	A	A	A	A	B	B	A	B	A	A	A	B	B	A	B	B	B	B	B	B	A	A	B	B	A	A	B	B	B	A	A	B	A	A	A	A	A	B	A	A	A	B	B	B
Chr1_bin151	40551654	A	B	A	B	A	A	A	A	B	B	A	B	A	A	A	B	B	A	B	B	B	B	B	B	A	A	B	B	A	A	B	B	B	A	A	B	A	A	A	A	A	B	A	A	A	B	B	B
Chr1_bin152	40760523	A	B	A	B	A	A	A	A	B	B	A	B	A	A	A	B	B	A	B	B	B	B	B	B	A	A	B	B	A	A	B	B	B	A	A	B	A	A	A	A	A	B	A	A	A	B	B	B
Chr1_bin153	42181178	A	B	A	B	A	A	A	A	B	B	A	B	A	A	A	B	B	A	B	B	B	B	B	B	A	A	B	B	A	A	B	B	B	A	A	B	A	A	A	A	A	B	A	A	A	B	B	B
Chr1_bin154	42332612	A	B	A	B	A	A	A	A	B	B	A	B	A	A	A	B	B	A	B	B	B	B	B	B	A	A	B	B	A	A	B	B	B	A	A	B	A	A	A	A	A	B	A	A	A	B	B	B
Chr1_bin155	42455118	A	B	A	B	A	A	A	A	B	B	A	B	A	A	A	B	B	A	B	B	B	B	B	B	A	A	B	B	A	A	B	B	B	A	A	B	A	A	A	A	A	B	A	A	A	B	B	B
Chr1_bin156	42718774	A	B	A	B	A	A	A	A	B	B	A	B	A	A	A	B	B	A	B	B	B	B	B	B	A	A	B	B	A	A	B	B	B	A	A	B	A	A	A	A	A	B	A	A	A	B	B	B
Chr1_bin157	42917881	A	B	A	B	A	A	A	A	B	B	A	B	A	A	A	B	B	A	B	B	B	B	B	B	A	A	B	B	A	A	B	B	B	A	A	B	A	A	A	A	A	B	A	A	A	B	B	B
Chr1_bin158	43463285	A	B	A	B	A	A	A	A	B	B	A	B	A	A	A	B	B	A	B	B	B	B	B	B	A	A	B	B	A	A	B	B	B	A	A	B	A	A	A	A	A	B	A	A	A	B	B	B
Chr1_bin159	44055549	A	B	A	B	A	A	A	A	B	B	A	B	A	A	A	B	B	A	B	B	B	B	B	B	A	A	B	B	A	A	B	B	B	A	A	B	A	A	A	A	A	B	A	A	A	B	B	B
Chr1_bin160	44438701	A	B	A	B	A	A	A	A	B	B	A	B	A	A	A	B	B	A	B	B	B	B	B	B	A	A	B	B	A	A	B	B	B	A	A	B	A	A	A	A	A	B	A	A	A	B	B	B
Chr1_bin161	44485603	A	B	A	B	A	A	A	A	B	B	A	B	A	A	A	B	B	A	B	B	B	B	B	B	A	A	B	B	A	A	B	B	B	A	A	B	A	A	A	A	A	B	A	A	A	B	B	B
Chr1_bin162	45075975	A	B	A	B	A	A	A	A	B	B	A	B	A	A	A	B	B	A	B	B	B	B	B	B	A	A	B	B	A	A	B	B	B	A	A	B	A	A	A	A	A	B	A	A	A	B	B	B
Chr1_bin163	46365149	A	B	A	B	A	A	A	A	B	B	A	B	A	A	A	B	B	A	B	B	B	B	B	B	A	A	B	B	A	A	B	B	B	A	A	B	A	A	A	A	A	B	A	A	A	B	B	B
Chr1_bin164	46750335	A	B	A	B	A	A	A	A	B	B	A	B	A	A	A	B	B	A	B	B	B	B	B	B	A	A	B	B	A	A	B	B	B	A	A	B	A	A	A	A	A	B	A	A	A	B	B	B
Chr1_bin165	46945101	A	B	A	B	A	A	A	A	B	B	A	B	A	A	A	B	B	A	B	B	B	B	B	B	A	A	B	B	A	A	B	B	B	A	A	B	A	A	A	A	A	B	A	A	A	B	B	B
Chr1_bin166	47248613	A	B	A	B	A	A	A	A	B	B	A	B	A	A	A	B	B	A	B	B	B	B	B	B	A	A	B	B	A	A	B	B	B	A	A	B	A	A	A	A	A	B	A	A	A	B	B	B
Chr1_bin167	47258255	A	B	A	B	A	A	A	A	B	B	A	B	A	A	A	B	B	A	B	B	B	B	B	B	A	A	B	B	A	A	B	B	B	A	A	B	A	A	A	A	A	B	A	A	A	B	B	B
Chr1_bin168	47984278	A	B	A	B	A	A	A	A	B	B	A	B	A	A	A	B	B	A	B	B	B	B	B	B	A	A	B	B	A	A	B	B	B	A	A	B	A	A	A	A	A	B	A	A	A	B	B	B
Chr1_bin169	48079368	A	B	A	B	A	A	A	A	B	B	A	B	A	A	A	B	B	A	B	B	B	B	B	B	A	A	B	B	A	A	B	B	B	A	A	B	A	A	A	A	A	B	A	A	A	B	B	B
Chr1_bin170	48889555	A	B	A	B	A	A	A	A	B	B	A	B	A	A	A	B	B	A	B	B	B	B	B	B	A	A	B	B	A	A	B	B	B	A	A	B	A	A	A	A	A	B	A	A	A	B	B	B
Chr1_bin171	49238086	A	B	A	B	A	A	A	A	B	B	A	B	A	A	A	B	B	A	B	B	B	B	B	B	A	A	B	B	A	A	B	B	B	A	A	B	A	A	A	A	A	B	A	A	A	B	B	B
Chr1_bin172	49931194	A	B	A	B	A	A	A	A	B	B	A	B	A	A	A	B	B	A	B	B	B	B	B	B	A	A	B	B	A	A	B	B	B	A	A	B	A	A	A	A	A	B	A	A	A	B	B	B
Chr1_bin173	50471531	A	B	A	B	A	A	A	A	B	B	A	B	A	A	A	B	B	A	B	B	B	B	B	B	A	A	B	B	A	A	B	B	B	A	A	B	A	A	A	A	A	B	A	A	A	B	B	B
Chr1_bin174	50886972	A	B	A	B	A	A	A	A	B	B	A	B	A	A	A	B	B	A	B	B	B	B	B	B	A	A	B	B	A	A	B	B	B	A	A	B	A	A	A	A	A	B	A	A	A	B	B	B
Chr1_bin175	50967368	A	B	A	B	A	A	A	A	B	B	A	B	A	A	A	B	B	A	B	B	B	B	B	B	A	A	B	B	A	A	B	B	B	A	A	B	A	A	A	A	A	B	A	A	A	B	B	B
Chr1_bin176	51064853	A	B	A	B	A	A	A	A	B	B	A	B	A	A	A	B	B	A	B	B	B	B	B	B	A	A	B	B	A	A	B	B	B	A	A	B	A	A	A	A	A	B	A	A	A	B	B	B
Chr1_bin177	52159823	A	B	A	B	A	A	A	A	B	B	A	B	A	A	A	B	B	A	B	B	B	B	B	B	A	A	B	B	A	A	B	B	B	A	A	B	A	A	A	A	A	B	A	A	A	B	B	B
Chr1_bin178	52583660	A	B	A	B	A	A	A	A	B	B	A	B	A	A	A	B	B	A	B	B	B	B	B	B	A	A	B	B	A	A	B	B	B	A	A	B	A	A	A	A	A	B	A	A	A	B	B	B
Chr1_bin179	52713686	A	B	A	B	A	A	A	A	B	B	A	B	A	A	A	B	B	A	B	B	B	B	B	B	A	A	B	B	A	A	B	B	B	A	A	B	A	A	A	A	A	B	A	A	A	B	B	B
Chr1_bin180	52859616	A	B	A	B	A	A	A	A	B	B	A	B	A	A	A	B	B	A	B	B	B	B	B	B	A	A	B	B	A	A	B	B	B	A	A	B	A	A	A	A	A	B	A	A	A	B	B	B
Chr1_bin181	53275229	A	B	A	B	A	A	A	A	B	B	A	B	A	A	A	B	B	A	B	B	B	B	B	B	A	A	B	B	A	A	B	B	B	A	A	B	A	A	A	A	A	B	A	A	A	B	B	B
Chr1_bin182	53430187	A	B	A	B	A	A	A	A	B	B	A	B	A	A	A	B	B	A	B	B	B	B	B	B	A	A	B	B	A	A	B	B	B	A	A	B	A	A	A	A	A	B	A	A	A	B	B	B
Chr1_bin183	53494767	A	B	A	B	A	A	A	A	B	B	A	B	A	A	A	B	B	A	B	B	B	B	B	B	A	A	B	B	A	A	B	B	B	A	A	B	A	A	A	A	A	B	A	A	A	B	B	B
Chr1_bin184	53613082	A	B	A	B	A	A	A	A	B	B	A	B	A	A	A	B	B	A	B	B	B	B	B	B	A	A	B	B	A	A	B	B	B	A	A	B	A	A	A	A	A	B	A	A	A	B	B	B
Chr1_bin185	54024278	A	B	A	B	A	A	A	A	B	B	A	B	A	A	A	B	B	A	B	B	B	B	B	B	A	A	B	B	A	A	B	B	B	A	A	B	A	A	A	A	A	B	A	A	A	B	B	B
Chr1_bin186	55485274	A	B	A	B	A	A	A	A	B	B	A	B	A	A	A	B	B	A	B	B	B	B	B	B	A	A	B	B	A	A	B	B	B	A	A	B	A	A	A	A	A	B	A	A	A	B	B	B
Chr1_bin187	55796775	A	B	A	B	A	A	A	A	B	B	A	B	A	A	A	B	B	A	B	B	B	B	B	B	A	A	B	B	A	A	B	B	B	A	A	B	A	A	A	A	A	B	A	A	A	B	B	B
Chr1_bin188	55913739	A	B	A	B	A	A	A	A	B	B	A	B	A	A	A	B	B	A	B	B	B	B	B	B	A	A	B	B	A	A	B	B	B	A	A	B	A	A	A	A	A	B	A	A	A	B	B	B
Chr1_bin189	56225246	A	B	A	B	A	A	A	A	B	B	A	B	A	A	A	B	B	A	B	B	B	B	B	B	A	A	B	B	A	A	B	B	B	A	A	B	A	A	A	A	A	B	A	A	A	B	B	B
Chr1_bin190	56445639	A	B	A	B	A	A	A	A	B	B	A	B	A	A	A	B	B	A	B	B	B	B	B	B	A	A	B	B	A	A	B	B	B	A	A	B	A	A	A	A	A	B	A	A	A	B	B	B
Chr1_bin191	56560637	A	B	A	B	A	A	A	A	B	B	A	B	A	A	A	B	B	A	B	B	B	B	B	B	A	A	B	B	A	A	B	B	B	A	A	B	A	A	A	A	A	B	A	A	A	B	B	B
Chr1_bin192	57053033	A	B	A	B	A	A	A	A	B	B	A	B	A	A	A	B	B	A	B	B	B	B	B	B	A	A	B	B	A	A	B	B	B	A	A	B	A	A	A	A	A	B	A	A	A	B	B	B
Chr1_bin193	57856398	A	B	A	B	A	A	A	A	B	B	A	B	A	A	A	B	B	A	B	B	B	B	B	B	A	A	B	B	A	A	B	B	B	A	A	B	A	A	A	A	A	B	A	A	A	B	B	B
Chr1_bin194	58513737	A	B	A	B	A	A	A	A	B	B	A	B	A	A	A	B	B	A	B	B	B	B	B	B	A	A	B	B	A	A	B	B	B	A	A	B	A	A	A	A	A	B	A	A	A	B	B	B
Chr1_bin195	58847364	A	B	A	B	A	A	A	A	B	B	A	B	A	A	A	B	B	A	B	B	B	B	B	B	A	A	B	B	A	A	B	B	B	A	A	B	A	A	A	A	A	B	A	A	A	B	B	B
Chr1_bin196	58898062	A	B	A	B	A	A	A	A	B	B	A	B	A	A	A	B	B	A	B	B	B	B	B	B	A	A	B	B	A	A	B	B	B	A	A	B	A	A	A	A	A	B	A	A	A	B	B	B
Chr1_bin197	59304919	A	B	A	B	A	A	A	A	B	B	A	B	A	A	A	B	B	A	B	B	B	B	B	B	A	A	B	B	A	A	B	B	B	A	A	B	A	A	A	A	A	B	A	A	A	B	B	B
Chr1_bin198	59995064	A	B	A	B	A	A	A	A	B	B	A	B	A	A	A	B	B	A	B	B	B	B	B	B	A	A	B	B	A	A	B	B	B	A	A	B	A	A	A	A	A	B	A	A	A	B	B	B
Chr1_bin199	60392269	A	B	A	B	A	A	A	A	B	B	A	B	A	A	A	B	B	A	B	B	B	B	B	B	A	A	B	B	A	A	B	B	B	A	A	B	A	A	A	A	A	B	A	A	A	B	B	B
Chr1_bin200	60613986	A	B	A	B	A	A	A	A	B	B	A	B	A	A	A	B	B	A	B	B	B	B	B	B	A	A	B	B	A	A	B	B	B	A	A	B	A	A	A	A	A	B	A	A	A	B	B	B
Chr1_bin201	61231867	A	B	A	B	A	A	A	A	B	B	A	B	A	A	A	B	B	A	B	B	B	B	B	B	A	A	B	B	A	A	B	B	B	A	A	B	A	A	A	A	A	B	A	A	A	B	B	B
Chr1_bin202	61545113	A	B	A	B	A	A	A	A	B	B	A	B	A	A	A	B	B	A	B	B	B	B	B	B	A	A	B	B	A	A	B	B	B	A	A	B	A	A	A	A	A	B	A	A	A	B	B	B
Chr1_bin203	61569680	A	B	A	B	A	A	A	A	B	B	A	B	A	A	A	B	B	A	B	B	B	B	B	B	A	A	B	B	A	A	B	B	B	A	A	B	A	A	A	A	A	B	A	A	A	B	B	B
Chr1_bin204	62328803	A	B	A	B	A	A	A	A	B	B	A	B	A	A	A	B	B	A	B	B	B	B	B	B	A	A	B	B	A	A	B	B	B	A	A	B	A	A	A	A	A	B	A	A	A	B	B	B
Chr1_bin205	64167317	A	B	A	B	A	A	A	A	B	B	A	B	A	A	A	B	B	A	B	B	B	B	B	B	A	A	B	B	A	A	B	B	B	A	A	B	A	A	A	A	A	B	A	A	A	B	B	B
Chr1_bin206	64708399	A	B	A	B	A	A	A	A	B	B	A	B	A	A	A	B	B	A	B	B	B	B	B	B	A	A	B	B	A	A	B	B	B	A	A	B	A	A	A	A	A	B	A	A	A	B	B	B
Chr1_bin207	64812769	A	B	A	B	A	A	A	A	B	B	A	B	A	A	A	B	B	A	B	B	B	B	B	B	A	A	B	B	A	A	B	B	B	A	A	B	A	A	A	A	A	B	A	A	A	B	B	B
Chr1_bin208	64935198	A	B	A	B	A	A	A	A	B	B	A	B	A	A	A	B	B	A	B	B	B	B	B	B	A	A	B	B	A	A	B	B	B	A	A	B	A	A	A	A	A	B	A	A	A	B	B	B
Chr1_bin209	64989322	A	B	A	B	A	A	A	A	B	B	A	B	A	A	A	B	B	A	B	B	B	B	B	B	A	A	B	B	A	A	B	B	B	A	A	B	A	A	A	A	A	B	A	A	A	B	B	B
Chr1_bin210	65553662	A	B	A	B	A	A	A	A	B	B	A	B	A	A	A	B	B	A	B	B	B	B	B	B	A	A	B	B	A	A	B	B	B	A	A	B	A	A	A	A	A	B	A	A	A	B	B	B
Chr1_bin211	66192643	A	B	A	B	A	A	A	A	B	B	A	B	A	A	A	B	B	A	B	B	B	B	B	B	A	A	B	B	A	A	B	B	B	A	A	B	A	A	A	A	A	B	A	A	A	B	B	B
Chr1_bin212	66824205	A	B	A	B	A	A	A	A	B	B	A	B	A	A	A	B	B	A	B	B	B	B	B	B	A	A	B	B	A	A	B	B	B	A	A	B	A	A	A	A	A	B	A	A	A	B	B	B
Chr1_bin213	69070280	A	B	A	B	A	A	A	A	B	B	A	B	A	A	A	B	B	A	B	B	B	B	B	B	A	A	B	B	A	A	B	B	B	A	A	B	A	A	A	A	A	B	A	A	A	B	B	B
Chr1_bin214	69874982	A	B	A	B	A	A	A	A	B	B	A	B	A	A	A	B	B	A	B	B	B	B	B	B	A	A	B	B	A	A	B	B	B	A	A	B	A	A	A	A	A	B	A	A	A	B	B	B
Chr1_bin215	70084749	A	B	A	B	A	A	A	A	B	B	A	B	A	A	A	B	B	A	B	B	B	B	B	B	A	A	B	B	A	A	B	B	B	A	A	B	A	A	A	A	A	B	A	A	A	B	B	B
Chr1_bin216	70444067	A	B	A	B	A	A	A	A	B	B	A	B	A	A	A	B	B	A	B	B	B	B	B	B	A	A	B	B	A	A	B	B	B	A	A	B	A	A	A	A	A	B	A	A	A	B	B	B
Chr1_bin217	70460736	A	B	A	B	A	A	A	A	B	B	A	B	A	A	A	B	B	A	B	B	B	B	B	B	A	A	B	B	A	A	B	B	B	A	A	B	A	A	A	A	A	B	A	A	A	B	B	B
Chr1_bin218	70715837	A	B	A	B	A	A	A	A	B	B	A	B	A	A	A	B	B	A	B	B	B	B	B	B	A	A	B	B	A	A	B	B	B	A	A	B	A	A	A	A	A	B	A	A	A	B	B	B
Chr1_bin219	70934700	A	B	A	B	A	A	A	A	B	B	A	B	A	A	A	B	B	A	B	B	B	B	B	B	A	A	B	B	A	A	B	B	B	A	A	B	A	A	A	A	A	B	A	A	A	B	B	B
Chr1_bin220	71065008	A	B	A	B	A	A	A	A	B	B	A	B	A	A	A	B	B	A	B	B	B	B	B	B	A	A	B	B	A	A	B	B	B	A	A	B	A	A	A	A	A	B	A	A	A	B	B	B
Chr1_bin221	71526643	A	B	A	B	A	A	A	A	B	B	A	B	A	A	A	B	B	A	B	B	B	B	B	B	A	A	B	B	A	A	B	B	B	A	A	B	A	A	A	A	A	B	A	A	A	B	B	B
Chr1_bin222	71645134	A	B	A	B	A	A	A	A	B	B	A	B	A	A	A	B	B	A	B	B	B	B	B	B	A	A	B	B	A	A	B	B	B	A	A	B	A	A	A	A	A	B	A	A	A	B	B	B
Chr1_bin223	71966396	A	B	A	B	A	A	A	A	B	B	A	B	A	A	A	B	B	A	B	B	B	B	B	B	A	A	B	B	A	A	B	B	B	A	A	B	A	A	A	A	A	B	A	A	A	B	B	B
Chr1_bin224	73484475	A	B	A	B	A	A	A	A	B	B	A	B	A	A	A	B	B	A	B	B	B	B	B	B	A	A	B	B	A	A	B	B	B	A	A	B	A	A	A	A	A	B	A	A	A	B	B	B
Chr1_bin225	73936324	A	B	A	B	A	A	A	A	B	B	A	B	A	A	A	B	B	A	B	B	B	B	B	B	A	A	B	B	A	A	B	B	B	A	A	B	A	A	A	A	A	B	A	A	A	B	B	B
Chr1_bin226	74345565	A	B	A	B	A	A	A	A	B	B	A	B	A	A	A	B	B	A	B	B	B	B	B	B	A	A	B	B	A	A	B	B	B	A	A	B	A	A	A	A	A	B	A	A	A	B	B	B
Chr1_bin227	74731609	A	B	A	B	A	A	A	A	B	B	A	B	A	A	A	B	B	A	B	B	B	B	B	B	A	A	B	B	A	A	B	B	B	A	A	B	A	A	A	A	A	B	A	A	A	B	B	B
Chr1_bin228	76326779	A	B	A	B	A	A	A	A	B	B	A	B	A	A	A	B	B	A	B	B	B	B	B	B	A	A	B	B	A	A	B	B	B	A	A	B	A	A	A	A	A	B	A	A	A	B	B	B
Chr1_bin229	77099663	A	B	A	B	A	A	A	A	B	B	A	B	A	A	A	B	B	A	B	B	B	B	B	B	A	A	B	B	A	A	B	B	B	A	A	B	A	A	A	A	A	B	A	A	A	B	B	B
Chr1_bin230	77293596	A	B	A	B	A	A	A	A	B	B	A	B	A	A	A	B	B	A	B	B	B	B	B	B	A	A	B	B	A	A	B	B	B	A	A	B	A	A	A	A	A	B	A	A	A	B	B	B
Chr1_bin231	77818861	A	B	A	B	A	A	A	A	B	B	A	B	A	A	A	B	B	A	B	B	B	B	B	B	A	A	B	B	A	A	B	B	B	A	A	B	A	A	A	A	A	B	A	A	A	B	B	B
Chr1_bin232	78459848	A	B	A	B	A	A	A	A	B	B	A	B	A	A	A	B	B	A	B	B	B	B	B	B	A	A	B	B	A	A	B	B	B	A	A	B	A	A	A	A	A	B	A	A	A	B	B	B
Chr1_bin233	78915391	A	B	A	B	A	A	A	A	B	B	A	B	A	A	A	B	B	A	B	B	B	B	B	B	A	A	B	B	A	A	B	B	B	A	A	B	A	A	A	A	A	B	A	A	A	B	B	B
Chr1_bin234	79023922	A	B	A	B	A	A	A	A	B	B	A	B	A	A	A	B	B	A	B	B	B	B	B	B	A	A	B	B	A	A	B	B	B	A	A	B	A	A	A	A	A	B	A	A	A	B	B	B
Chr1_bin235	80313012	A	B	A	B	A	A	A	A	B	B	A	B	A	A	A	B	B	A	B	B	B	B	B	B	A	A	B	B	A	A	B	B	B	A	A	B	A	A	A	A	A	B	A	A	A	B	B	B
Chr1_bin236	80368664	A	B	A	B	A	A	A	A	B	B	A	B	A	A	A	B	B	A	B	B	B	B	B	B	A	A	B	B	A	A	B	B	B	A	A	B	A	A	A	A	A	B	A	A	A	B	B	B
Chr1_bin237	80657542	A	B	A	B	A	A	A	A	B	B	A	B	A	A	A	B	B	A	B	B	B	B	B	B	A	A	B	B	A	A	B	B	B	A	A	B	A	A	A	A	A	B	A	A	A	B	B	B
Chr1_bin238	81162516	A	B	A	B	A	A	A	A	B	B	A	B	A	A	A	B	B	A	B	B	B	B	B	B	A	A	B	B	A	A	B	B	B	A	A	B	A	A	A	A	A	B	A	A	A	B	B	B
Chr1_bin239	81268112	A	B	A	B	A	A	A	A	B	B	A	B	A	A	A	B	B	A	B	B	B	B	B	B	A	A	B	B	A	A	B	B	B	A	A	B	A	A	A	A	A	B	A	A	A	B	B	B
Chr1_bin240	82608118	A	B	A	B	A	A	A	A	B	B	A	B	A	A	A	B	B	A	B	B	B	B	B	B	A	A	B	B	A	A	B	B	B	A	A	B	A	A	A	A	A	B	A	A	A	B	B	B
Chr1_bin241	82778756	A	B	A	B	A	A	A	A	B	B	A	B	A	A	A	B	B	A	B	B	B	B	B	B	A	A	B	B	A	A	B	B	B	A	A	B	A	A	A	A	A	B	A	A	A	B	B	B
Chr1_bin242	83107052	A	B	A	B	A	A	A	A	B	B	A	B	A	A	A	B	B	A	B	B	B	B	B	B	A	A	B	B	A	A	B	B	B	A	A	B	A	A	A	A	A	B	A	A	A	B	B	B
Chr1_bin243	83196027	A	B	A	B	A	A	A	A	B	B	A	B	A	A	A	B	B	A	B	B	B	B	B	B	A	A	B	B	A	A	B	B	B	A	A	B	A	A	A	A	A	B	A	A	A	B	B	B
Chr1_bin244	83279047	A	B	A	B	A	A	A	A	B	B	A	B	A	A	A	B	B	A	B	B	B	B	B	B	A	A	B	B	A	A	B	B	B	A	A	B	A	A	A	A	A	B	A	A	A	B	B	B
Chr1_bin245	84164847	A	B	A	B	A	A	A	A	B	B	A	B	A	A	A	B	B	A	B	B	B	B	B	B	A	A	B	B	A	A	B	B	B	A	A	B	A	A	A	A	A	B	A	A	A	B	B	B
Chr1_bin246	84836910	A	B	A	B	A	A	A	A	B	B	A	B	A	A	A	B	B	A	B	B	B	B	B	B	A	A	B	B	A	A	B	B	B	A	A	B	A	A	A	A	A	B	A	A	A	B	B	B
Chr1_bin247	85533996	A	B	A	B	A	A	A	A	B	B	A	B	A	A	A	B	B	A	B	B	B	B	B	B	A	A	B	B	A	A	B	B	B	A	A	B	A	A	A	A	A	B	A	A	A	B	B	B
Chr1_bin248	85829368	A	B	A	B	A	A	A	A	B	B	A	B	A	A	A	B	B	A	B	B	B	B	B	B	A	A	B	B	A	A	B	B	B	A	A	B	A	A	A	A	A	B	A	A	A	B	B	B
Chr1_bin249	85927257	A	B	A	B	A	A	A	A	B	B	A	B	A	A	A	B	B	A	B	B	B	B	B	B	A	A	B	B	A	A	B	B	B	A	A	B	A	A	A	A	A	B	A	A	A	B	B	B
Chr1_bin250	86127037	A	B	A	B	A	A	A	A	B	B	A	B	A	A	A	B	B	A	B	B	B	B	B	B	A	A	B	B	A	A	B	B	B	A	A	B	A	A	A	A	A	B	A	A	A	B	B	B
Chr1_bin251	86197951	A	B	A	B	A	A	A	A	B	B	A	B	A	A	A	B	B	A	B	B	B	B	B	B	A	A	B	B	A	A	B	B	B	A	A	B	A	A	A	A	A	B	A	A	A	B	B	B
Chr1_bin252	87378420	A	B	A	B	A	A	A	A	B	B	A	B	A	A	A	B	B	A	B	B	B	B	B	B	A	A	B	B	A	A	B	B	B	A	A	B	A	A	A	A	A	B	A	A	A	B	B	B
Chr1_bin253	88317106	A	B	A	B	A	A	A	A	B	B	A	B	A	A	A	B	B	A	B	B	B	B	B	B	A	A	B	B	A	A	B	B	B	A	A	B	A	A	A	A	A	B	A	A	A	B	B	B
Chr1_bin254	88869560	A	B	A	B	A	A	A	A	B	B	A	B	A	A	A	B	B	A	B	B	B	B	B	B	A	A	B	B	A	A	B	B	B	A	A	B	A	A	A	A	A	B	A	A	A	B	B	B
Chr1_bin255	89283993	A	B	A	B	A	A	A	A	B	B	A	B	A	A	A	B	B	A	B	B	B	B	B	B	A	A	B	B	A	A	B	B	B	A	A	B	A	A	A	A	A	B	A	A	A	B	B	B
Chr1_bin256	89461426	A	B	A	B	A	A	A	A	B	B	A	B	A	A	A	B	B	A	B	B	B	B	B	B	A	A	B	B	A	A	B	B	B	A	A	B	A	A	A	A	A	B	A	A	A	B	B	B
Chr1_bin257	89560945	A	B	A	B	A	A	A	A	B	B	A	B	A	A	A	B	B	A	B	B	B	B	B	B	A	A	B	B	A	A	B	B	B	A	A	B	A	A	A	A	A	B	A	A	A	B	B	B
Chr1_bin258	89713436	A	B	A	B	A	A	A	A	B	B	A	B	A	A	A	B	B	A	B	B	B	B	B	B	A	A	B	B	A	A	B	B	B	A	A	B	A	A	A	A	A	B	A	A	A	B	B	B
Chr1_bin259	90258008	A	B	A	B	A	A	A	A	B	B	A	B	A	A	A	B	B	A	B	B	B	B	B	B	A	A	B	B	A	A	B	B	B	A	A	B	A	A	A	A	A	B	A	A	A	B	B	B
Chr1_bin260	90593460	A	B	A	B	A	A	A	A	B	B	A	B	A	A	A	B	B	A	B	B	B	B	B	B	A	A	B	B	A	A	B	B	B	A	A	B	A	A	A	A	A	B	A	A	A	B	B	B
Chr1_bin261	91097504	A	B	A	B	A	A	A	A	B	B	A	B	A	A	A	B	B	A	B	B	B	B	B	B	A	A	B	B	A	A	B	B	B	A	A	B	A	A	A	A	A	B	A	A	A	B	B	B
Chr1_bin262	91543907	A	B	A	B	A	A	A	A	B	B	A	B	A	A	A	B	B	A	B	B	B	B	B	B	A	A	B	B	A	A	B	B	B	A	A	B	A	A	A	A	A	B	A	A	A	B	B	B
Chr1_bin263	92436435	A	B	A	B	A	A	A	A	B	B	A	B	A	A	A	B	B	A	B	B	B	B	B	B	A	A	B	B	A	A	B	B	B	A	A	B	A	A	A	A	A	B	A	A	A	B	B	B
Chr1_bin264	92617469	A	B	A	B	A	A	A	A	B	B	A	B	A	A	A	B	B	A	B	B	B	B	B	B	A	A	B	B	A	A	B	B	B	A	A	B	A	A	A	A	A	B	A	A	A	B	B	B
Chr1_bin265	92797376	A	B	A	B	A	A	A	A	B	B	A	B	A	A	A	B	B	A	B	B	B	B	B	B	A	A	B	B	A	A	B	B	B	A	A	B	A	A	A	A	A	B	A	A	A	B	B	B
Chr1_bin266	93431113	A	B	A	B	A	A	A	A	B	B	A	B	A	A	A	B	B	A	B	B	B	B	B	B	A	A	B	B	A	A	B	B	B	A	A	B	A	A	A	A	A	B	A	A	A	B	B	B
Chr1_bin267	93644074	A	B	A	B	A	A	A	A	B	B	A	B	A	A	A	B	B	A	B	B	B	B	B	B	A	A	B	B	A	A	B	B	B	A	A	B	A	A	A	A	A	B	A	A	A	B	B	B
Chr1_bin268	93847368	B	B	A	B	A	A	A	A	B	B	A	B	A	A	A	B	B	A	B	B	B	B	B	B	A	A	B	B	A	A	B	B	B	A	A	B	A	A	A	A	A	B	A	A	A	B	B	B
Chr1_bin269	93964486	B	B	A	B	A	A	A	A	B	B	A	B	A	A	A	B	B	A	B	B	B	B	B	B	A	A	B	B	A	A	B	B	B	A	A	B	A	A	A	A	A	B	A	A	A	B	B	B
Chr1_bin270	94360237	B	B	A	B	A	A	A	A	B	B	A	B	A	A	A	B	B	A	B	B	B	B	B	B	A	A	B	B	A	A	B	B	B	A	A	B	A	A	A	A	A	B	A	A	A	B	B	B
Chr1_bin271	94674594	B	B	A	B	A	A	A	A	B	B	A	B	A	A	A	B	B	A	B	B	B	B	B	B	A	A	B	B	A	A	B	B	B	A	A	B	A	A	A	A	A	B	A	A	A	B	B	B
Chr1_bin272	94824613	B	B	A	B	A	A	A	A	B	B	A	B	A	A	A	B	B	A	B	B	B	B	B	B	A	A	B	B	A	A	B	B	B	A	A	B	A	A	A	A	A	B	A	A	A	B	B	B
Chr1_bin273	94855923	B	B	A	B	A	A	A	A	B	B	A	B	A	A	A	B	B	A	B	B	B	B	B	B	A	A	B	B	A	A	B	B	B	A	A	B	A	A	A	A	A	B	A	A	A	B	B	B
Chr1_bin274	94991447	B	B	A	B	A	A	A	A	B	B	A	B	A	A	A	B	B	A	B	B	B	B	B	B	A	A	B	B	A	A	B	B	B	A	A	B	A	A	A	A	A	B	A	A	A	B	B	B
Chr1_bin275	95235922	B	B	A	B	A	A	A	A	B	B	A	B	A	A	A	B	B	A	B	B	B	B	B	B	A	A	A	B	A	A	B	B	B	A	A	B	A	A	A	A	A	B	A	A	A	B	B	B
Chr1_bin276	95345346	B	B	A	B	A	A	A	A	B	B	A	B	A	A	A	B	B	A	B	B	B	B	B	B	A	A	A	B	A	A	B	B	B	A	A	B	A	A	A	A	A	B	A	A	A	B	B	B
Chr1_bin277	95541184	B	B	A	B	A	A	A	A	B	B	A	B	A	A	A	B	B	A	B	B	B	B	B	B	A	A	A	B	A	A	B	B	B	A	A	B	A	A	A	A	A	B	A	A	A	B	B	B
Chr1_bin278	95902815	B	B	A	B	A	A	A	A	B	B	A	B	A	A	A	B	B	A	B	B	B	B	B	B	A	A	A	B	A	A	B	B	B	A	A	B	A	A	A	A	A	B	A	A	A	B	B	B
Chr1_bin279	95975783	B	B	A	B	A	A	A	A	B	B	A	B	A	A	A	B	B	A	B	B	B	B	B	B	A	A	A	B	A	A	B	B	B	A	A	B	A	A	A	A	A	B	A	A	A	B	B	B
Chr1_bin280	96061421	B	B	A	A	A	A	A	A	B	B	A	B	A	A	A	B	B	A	B	B	B	B	B	B	A	A	A	B	A	A	B	B	B	A	A	B	A	A	A	A	A	B	A	A	A	B	B	B
Chr1_bin281	96178664	B	B	A	A	A	A	A	A	B	B	A	B	A	A	A	B	B	A	B	B	B	B	B	B	A	A	A	B	A	A	B	B	B	A	A	B	A	A	A	A	A	B	A	A	A	B	B	B
Chr1_bin282	96347095	B	B	A	A	A	A	A	A	B	B	A	B	A	A	A	B	B	A	B	B	B	B	B	B	A	A	A	B	A	A	B	B	B	A	A	B	A	A	A	A	A	B	A	A	A	B	B	B
Chr1_bin283	96521329	B	B	A	A	A	A	A	A	B	B	A	B	A	A	A	B	B	A	B	B	B	B	B	B	A	A	A	A	A	A	B	B	B	A	A	B	A	A	A	A	A	B	A	A	A	B	B	B
Chr1_bin284	96727384	B	B	A	A	A	A	A	A	B	B	A	B	A	A	A	B	B	A	B	B	B	B	B	B	A	A	A	A	A	A	B	B	B	A	A	B	A	A	A	A	A	B	A	A	A	B	B	B
Chr1_bin285	96843845	B	B	A	A	A	A	A	A	B	B	A	B	A	A	A	B	B	A	B	B	B	B	B	B	A	A	A	A	A	A	B	B	B	A	A	B	A	A	A	A	A	B	A	A	A	B	B	B
Chr1_bin286	96949667	B	B	A	A	A	A	A	A	B	B	A	B	A	B	A	B	B	A	B	B	B	B	B	B	A	A	A	A	A	A	B	B	B	A	A	B	A	A	A	A	A	B	A	A	A	B	B	B
Chr1_bin287	96997611	B	B	A	A	A	A	A	A	B	B	A	B	A	B	A	B	B	A	B	B	B	B	B	B	A	A	A	A	A	A	B	B	B	A	A	B	A	A	A	A	A	B	A	A	A	B	B	B
Chr1_bin288	97113997	B	B	A	A	A	A	A	A	B	B	A	B	A	B	A	B	B	A	B	B	B	B	B	B	A	A	A	A	A	A	B	B	B	A	A	B	A	A	A	A	A	B	A	A	A	B	B	B
Chr1_bin289	97438034	B	B	A	A	A	A	A	A	B	B	B	B	A	B	A	B	B	A	B	B	B	B	B	B	A	A	A	A	A	A	B	B	B	A	A	B	A	A	A	A	A	B	A	A	A	B	B	B
Chr1_bin290	97474475	B	B	A	A	A	A	A	A	B	B	B	B	A	B	A	B	B	A	B	B	B	B	B	B	A	A	A	A	A	A	B	B	B	A	A	B	A	A	A	A	A	B	B	A	A	B	B	B
Chr1_bin291	97634380	B	B	A	A	A	A	A	A	B	B	B	B	A	B	A	B	B	A	B	B	B	B	B	B	A	A	A	A	A	A	B	B	B	A	A	B	A	A	A	A	A	B	B	A	A	B	B	B
Chr1_bin292	97722893	B	B	A	A	A	A	A	A	B	B	B	B	A	B	A	B	B	A	B	B	B	B	B	B	A	A	A	A	A	A	B	B	B	A	B	B	A	A	A	A	A	B	B	A	A	B	B	B
Chr1_bin293	97768909	B	B	A	A	A	A	A	A	B	B	B	B	A	B	A	B	B	A	B	B	B	B	B	B	A	A	A	A	A	A	B	B	B	A	B	B	A	A	A	A	A	B	B	A	A	B	B	B
Chr1_bin294	98135947	B	B	A	A	A	A	A	A	B	B	B	B	A	B	A	B	B	A	B	B	B	B	B	B	A	A	A	A	A	A	B	B	B	A	B	B	A	A	A	A	A	B	B	A	A	B	B	B
Chr1_bin295	98191250	B	B	A	A	A	A	A	A	B	B	B	B	A	B	A	B	B	A	B	B	B	B	B	B	A	A	A	A	A	A	B	B	B	A	B	B	A	A	A	A	A	B	B	A	A	B	B	B
Chr1_bin296	98264999	B	B	A	A	A	A	A	A	B	B	B	B	A	B	A	B	B	A	B	B	B	B	B	B	A	A	A	A	A	A	B	B	B	A	B	B	A	A	A	A	A	B	B	A	A	B	B	B
Chr1_bin297	98431937	B	B	A	A	A	A	A	A	B	B	B	B	A	B	A	B	B	A	B	B	B	B	B	B	A	A	A	A	A	A	B	B	B	A	B	B	A	A	A	A	A	B	B	A	A	B	B	B
Chr1_bin298	98526859	B	B	A	A	A	A	A	A	B	B	B	B	A	B	A	B	B	A	B	B	B	B	B	B	A	A	A	B	A	A	B	B	B	A	B	B	A	A	A	A	A	B	B	A	A	B	B	B
Chr1_bin299	98639075	B	B	A	A	A	A	A	A	B	B	B	B	A	B	A	B	B	A	B	B	B	B	B	B	A	A	A	B	A	A	B	B	B	A	B	B	A	A	A	A	A	B	B	A	A	B	B	B
Chr1_bin300	98710550	B	B	A	A	A	A	A	A	B	B	B	B	A	B	A	B	B	A	B	B	B	B	B	B	A	A	A	B	A	A	B	B	B	A	B	B	A	A	A	A	A	B	B	A	A	B	B	B
Chr1_bin301	98834961	B	B	A	A	A	A	A	A	B	B	B	B	A	B	A	B	B	A	B	B	B	B	B	B	A	A	A	B	A	A	B	B	B	A	B	B	A	A	A	B	A	B	B	A	A	B	B	B
Chr1_bin302	99921194	B	B	A	A	A	B	A	A	B	B	B	B	A	B	A	B	B	B	B	B	B	B	B	B	A	A	A	A	A	A	A	B	B	A	B	B	A	A	A	B	A	B	B	A	A	B	B	B
Chr1_bin303	100223197	B	B	A	A	A	B	A	A	B	B	B	B	A	B	A	B	B	B	B	B	B	B	B	B	A	A	A	A	A	A	A	B	B	A	B	B	A	A	A	B	A	B	B	A	A	B	B	B
Chr1_bin304	100263852	B	B	A	A	A	B	A	A	B	B	B	B	A	B	A	B	B	B	B	B	B	B	B	B	A	A	A	A	A	A	A	B	B	A	B	B	A	B	A	B	A	B	A	A	A	B	B	B
Chr1_bin305	100409609	B	B	A	A	A	B	A	A	B	B	B	B	A	B	A	B	B	B	B	B	B	B	B	B	A	A	A	A	A	A	A	B	B	A	B	B	A	B	A	B	A	B	A	A	A	B	B	B
Chr1_bin306	100544120	B	B	A	A	A	B	A	A	B	B	B	B	A	B	A	B	B	B	B	B	B	B	B	B	A	A	A	A	A	A	A	B	B	A	B	B	A	B	A	B	A	B	A	A	A	B	B	B
Chr1_bin307	100568166	B	B	A	A	B	B	A	A	B	B	B	B	A	B	A	B	B	B	B	B	B	B	B	B	A	A	A	A	A	A	A	B	B	A	B	B	A	B	A	B	A	B	A	A	A	B	B	B
Chr1_bin308	100841474	B	B	A	A	B	B	A	A	B	B	B	B	A	B	A	B	B	B	B	B	B	B	B	B	A	A	A	A	A	A	A	B	B	A	B	B	A	B	A	B	A	B	A	A	A	B	B	B
Chr1_bin309	101247769	B	B	A	A	B	B	A	A	B	B	B	B	A	B	A	B	B	B	B	B	B	B	B	B	A	A	A	A	A	A	A	B	B	A	B	B	A	B	A	B	A	B	A	A	A	B	B	B
Chr1_bin310	101335127	B	B	A	A	B	B	A	A	B	B	B	B	A	B	A	B	B	B	B	A	B	B	B	B	A	A	A	A	A	A	A	B	B	A	B	B	A	B	A	B	A	B	A	A	A	B	B	B
Chr1_bin311	101507280	B	B	A	A	B	B	A	A	B	B	B	B	A	B	A	B	B	B	B	A	B	B	B	B	A	A	A	A	A	A	A	B	B	A	B	B	A	B	A	B	A	B	A	A	A	B	B	B
Chr1_bin312	101595014	B	B	A	A	B	B	A	A	B	B	B	B	A	B	A	B	B	B	B	A	B	B	B	B	A	A	A	A	A	A	A	B	B	A	B	B	A	B	A	B	A	B	A	A	A	B	B	B
Chr1_bin313	101789849	B	B	A	A	B	B	A	A	B	B	B	B	A	B	A	B	B	B	B	A	B	B	B	B	A	A	A	A	A	A	A	B	B	A	B	B	A	B	A	B	A	B	A	A	A	B	B	B
Chr1_bin314	101939069	B	A	A	A	B	B	A	A	B	B	B	B	A	B	A	B	B	B	B	A	B	A	B	B	A	A	A	A	A	A	A	B	B	A	B	B	A	B	A	B	A	B	A	A	A	B	B	B
Chr1_bin315	102002259	B	A	A	A	B	B	A	A	B	B	B	B	A	B	A	B	B	B	B	A	B	A	B	B	A	A	A	A	A	A	A	B	B	A	B	B	A	B	A	B	A	B	A	A	A	B	B	B
Chr1_bin316	102098887	B	A	A	A	B	B	A	A	B	B	B	B	A	B	A	B	B	B	B	A	B	A	B	B	A	A	A	A	A	A	A	B	B	A	B	B	A	B	A	B	A	B	A	A	A	B	B	B
Chr1_bin317	102215882	B	A	A	A	B	B	A	A	B	B	B	B	A	B	A	B	B	B	B	A	B	A	B	B	A	A	A	A	A	A	A	B	B	A	B	B	A	B	A	B	A	B	A	A	A	B	B	B
Chr1_bin318	102347588	B	A	A	B	B	B	A	A	B	B	B	B	A	B	A	B	B	B	B	A	B	A	B	B	A	A	A	A	A	A	A	B	B	A	B	B	A	B	A	B	A	B	A	A	A	B	B	B
Chr1_bin319	102412280	A	A	A	B	B	B	A	A	B	B	B	B	A	B	A	B	B	B	B	A	B	A	B	B	A	A	A	A	A	A	A	B	B	A	B	B	A	B	A	B	A	B	A	A	A	B	B	B
Chr1_bin320	102509987	A	A	A	B	B	B	A	A	B	B	B	B	A	B	A	B	B	B	B	A	B	A	B	B	A	A	A	A	A	A	A	B	B	A	B	B	A	B	A	B	A	B	A	A	A	B	B	B
Chr1_bin321	102811776	A	A	A	B	B	B	A	A	B	B	B	B	A	B	A	B	B	B	B	A	B	A	B	B	A	A	A	A	A	A	A	B	B	A	B	B	A	B	A	B	A	B	A	A	A	B	B	B
Chr1_bin322	103139637	A	A	A	B	B	B	A	A	B	B	B	B	A	A	A	B	B	B	B	A	B	A	B	B	A	A	A	A	A	A	A	B	B	A	B	B	A	B	A	B	A	B	A	A	A	B	B	B
Chr1_bin323	103199840	A	A	A	B	B	B	A	A	B	B	B	B	A	A	A	B	B	B	B	A	B	A	B	B	A	A	A	A	A	A	A	B	B	A	B	B	A	B	A	B	A	B	A	A	A	B	B	B
Chr1_bin324	103339374	A	A	A	B	B	B	A	A	B	B	B	B	A	A	A	B	B	B	B	A	B	A	B	B	A	A	A	A	A	A	A	B	B	A	B	B	A	B	A	B	A	B	A	A	A	B	B	B
Chr1_bin325	103368728	A	A	A	B	B	B	A	A	B	B	B	B	A	A	A	B	B	B	B	A	B	A	B	B	A	A	A	A	A	A	A	B	B	A	B	B	A	B	A	B	A	B	A	A	A	B	B	B
Chr1_bin326	103526050	A	A	A	B	B	B	A	A	B	B	B	B	A	A	A	B	B	B	B	A	B	A	B	B	A	A	A	A	A	A	A	B	B	A	B	B	A	B	A	B	A	B	A	A	A	B	B	B
Chr1_bin327	103640366	A	A	A	B	B	B	A	A	B	B	B	B	A	A	A	B	B	B	B	A	B	A	B	B	A	A	A	A	A	A	A	B	B	A	B	B	A	B	A	B	A	B	A	A	A	B	B	B
Chr1_bin328	103739811	A	A	A	B	B	B	A	A	B	B	B	B	A	A	A	B	B	B	B	A	B	A	B	B	A	A	A	A	A	A	A	B	B	A	B	B	A	B	A	B	A	B	A	A	A	B	B	B
Chr1_bin329	103833689	A	A	A	B	B	B	A	A	B	B	B	B	A	A	A	B	B	B	B	A	B	A	B	B	A	A	A	A	A	A	A	B	B	A	B	B	A	B	A	B	A	B	A	A	A	B	B	B
Chr1_bin330	103948924	A	A	A	B	B	B	A	A	B	B	B	B	A	A	A	B	B	B	B	A	B	A	B	B	A	A	A	A	A	A	A	B	B	A	B	B	A	B	A	B	A	B	A	A	A	B	B	B
Chr1_bin331	104003275	A	A	A	B	B	A	A	A	A	B	B	B	A	A	A	B	B	B	B	A	B	A	B	B	A	A	A	A	A	A	A	B	B	A	A	B	A	B	A	B	A	B	A	A	A	B	B	B
Chr1_bin332	104336535	A	B	A	B	B	A	A	A	A	B	B	B	A	A	A	B	B	B	B	A	B	A	B	B	A	A	A	A	A	A	A	B	B	A	A	B	A	B	A	B	A	B	A	A	A	B	B	B
Chr1_bin333	104444419	A	B	A	B	B	A	A	A	A	B	B	B	A	A	A	B	B	B	B	A	B	A	B	B	A	A	A	A	A	A	A	B	B	A	A	B	A	B	A	B	A	B	A	A	A	B	B	B
Chr1_bin334	104610698	A	B	A	B	B	A	A	A	A	B	B	B	A	A	A	B	B	B	B	A	B	A	B	B	A	A	A	A	A	A	A	B	B	A	A	B	A	A	A	B	A	B	A	A	A	B	B	B
Chr1_bin335	105006825	A	B	A	B	B	A	A	A	A	B	B	B	A	A	A	B	B	B	B	A	B	A	B	B	A	A	A	A	A	A	A	B	B	A	A	B	A	A	A	B	A	B	A	A	A	B	B	B
Chr1_bin336	105147711	A	B	A	B	B	A	A	A	A	B	B	B	A	A	A	B	B	B	B	A	B	A	B	B	A	A	A	A	A	A	A	B	B	A	A	B	A	A	A	B	A	B	A	A	A	B	B	B
Chr1_bin337	105241784	A	B	A	B	B	A	A	A	A	B	B	A	A	A	A	B	B	B	B	A	B	A	B	B	A	A	A	A	A	A	A	B	B	A	A	B	A	A	A	B	A	B	A	A	A	B	B	B
Chr1_bin338	105302890	A	B	A	B	B	A	A	A	A	B	B	A	A	A	A	B	B	B	B	A	B	A	B	B	A	A	A	A	A	A	A	B	B	A	A	B	A	B	A	B	A	B	A	A	B	B	B	B
Chr1_bin339	105540261	A	B	A	B	B	A	A	A	A	B	B	A	A	A	A	B	B	B	B	A	B	A	B	B	A	A	A	A	A	A	A	B	B	A	A	B	A	B	A	B	A	B	A	A	B	B	B	B
Chr1_bin340	105646853	A	B	A	B	B	A	A	A	A	B	B	A	A	A	A	A	A	B	B	A	B	A	B	B	A	A	A	A	A	A	A	B	B	A	A	B	A	B	A	B	A	B	A	A	B	B	B	B
Chr1_bin341	105748327	A	B	A	B	B	A	A	A	A	B	B	A	A	A	A	A	A	B	B	A	B	A	B	B	A	A	A	A	A	A	A	B	B	A	A	B	A	A	A	B	A	B	A	A	B	B	B	B
Chr1_bin342	105836192	A	B	A	B	B	A	A	A	A	B	B	A	B	A	A	A	A	B	B	A	B	B	B	B	A	A	A	A	A	A	A	B	B	A	A	B	A	A	A	B	A	A	A	A	B	B	B	B
Chr1_bin343	105907987	A	B	A	B	B	A	A	A	A	B	B	A	B	A	A	A	A	B	B	A	B	B	B	B	A	A	A	A	A	A	A	B	B	A	A	B	A	A	A	B	A	A	A	A	B	B	B	B
Chr1_bin344	106046328	A	B	A	B	B	A	A	A	A	B	B	A	B	B	A	A	A	B	B	A	B	B	B	B	A	A	A	A	A	A	A	B	B	A	A	B	A	A	A	B	A	A	A	A	B	B	B	B
Chr1_bin345	106060333	A	B	A	B	A	A	A	A	A	B	B	A	B	B	A	A	A	B	B	A	B	B	B	B	A	A	A	A	A	A	A	B	B	A	A	B	A	A	A	B	A	A	A	A	B	B	B	B
Chr1_bin346	106215925	A	B	A	B	A	A	A	A	A	B	B	A	B	B	A	A	A	B	B	A	B	B	B	B	A	B	A	A	A	A	A	B	B	A	A	B	A	A	A	B	A	A	A	A	B	B	B	B
Chr1_bin347	106268074	A	B	A	B	A	A	A	A	A	B	B	B	B	B	A	A	A	B	B	A	B	B	B	B	A	B	A	A	A	A	A	B	B	A	A	B	A	A	A	B	A	A	A	A	B	B	B	B
Chr1_bin348	106401307	A	B	A	B	A	A	A	A	A	B	B	B	B	B	A	A	A	B	B	A	B	B	B	B	A	B	A	A	A	A	A	B	B	A	A	B	A	A	A	B	A	A	A	A	B	B	B	B
Chr1_bin349	106548886	A	B	A	B	A	A	A	A	A	B	B	B	B	B	A	A	A	B	B	A	B	B	B	B	A	B	A	A	A	A	A	B	B	A	A	B	A	A	A	B	A	A	A	A	B	B	B	B
Chr1_bin350	106632786	A	B	A	B	A	A	A	A	A	B	B	B	B	B	A	A	A	B	B	A	B	B	B	B	A	B	A	A	A	A	A	B	B	A	A	B	A	A	A	B	A	A	A	A	B	B	B	B
Chr1_bin351	106700916	A	B	A	B	A	A	A	A	A	B	B	B	B	B	A	A	A	B	B	A	B	B	B	B	A	B	A	A	A	A	A	B	B	A	A	B	A	A	A	B	A	A	A	A	B	B	B	B
Chr1_bin352	106783769	A	B	A	B	A	A	A	A	A	B	B	B	B	B	A	A	A	B	B	A	B	B	B	B	A	B	A	A	A	A	A	B	B	A	A	B	A	A	A	B	A	A	A	A	B	B	B	B
Chr1_bin353	106945374	A	B	A	B	A	A	A	A	A	B	B	B	B	B	A	A	A	B	B	A	B	B	B	B	A	B	A	A	A	A	A	B	B	A	A	B	A	A	A	B	A	A	A	A	B	B	B	B
Chr1_bin354	107007222	A	B	A	B	A	A	A	A	A	B	B	B	B	B	A	A	A	B	B	A	B	B	B	B	A	B	A	A	A	A	A	B	B	A	A	B	A	A	A	B	A	A	A	A	B	B	B	B
Chr1_bin355	107090076	A	B	A	B	A	A	A	A	A	B	B	B	B	B	A	A	A	B	B	A	B	B	B	B	A	B	A	A	A	A	A	B	B	A	A	B	A	A	A	B	A	A	A	A	B	B	B	B
Chr1_bin356	107242105	A	B	A	B	A	A	A	A	A	B	B	B	B	B	A	A	A	B	B	A	B	B	B	B	A	B	A	A	A	A	A	B	B	A	A	B	A	A	A	B	A	A	A	A	B	B	B	B
Chr1_bin357	107318225	A	B	A	B	A	A	A	A	A	B	B	B	B	B	A	A	A	B	B	A	B	B	B	B	A	B	A	A	A	A	A	B	B	A	A	B	A	A	A	B	A	A	A	A	A	B	B	B
Chr1_bin358	107530278	A	B	A	B	A	A	A	A	A	B	B	B	B	B	A	A	A	B	B	A	B	B	B	B	A	B	A	A	A	A	A	B	B	A	A	B	A	A	A	B	A	A	A	A	A	B	B	B
Chr1_bin359	107645049	A	B	A	B	A	A	A	A	A	B	B	B	A	B	A	A	A	B	B	A	B	B	B	B	A	B	A	A	A	A	A	B	B	A	A	B	A	A	A	B	A	A	A	A	A	B	B	B
Chr1_bin360	107725310	A	B	A	B	A	A	A	A	A	B	B	B	A	B	A	A	A	B	B	A	B	B	B	B	A	B	A	A	A	A	A	B	B	A	A	B	A	A	A	B	A	A	B	A	A	B	B	B
Chr1_bin361	107832528	A	B	A	B	A	A	A	A	A	B	B	B	A	B	A	A	A	B	B	A	B	B	B	B	A	B	A	A	A	A	A	B	B	A	A	B	A	A	A	B	A	A	B	A	A	B	B	B
Chr1_bin362	107907103	A	B	A	B	A	A	A	A	A	B	B	B	A	B	A	A	A	B	B	A	B	B	B	B	A	B	A	A	A	A	A	B	B	A	A	B	A	A	A	B	A	A	B	A	A	B	B	B
Chr1_bin363	108052842	A	B	A	B	A	A	A	A	A	B	B	B	A	B	A	A	A	B	B	A	B	B	B	B	A	B	A	A	A	A	A	B	B	A	A	B	A	A	A	B	A	A	B	A	A	B	B	B
Chr1_bin364	108246733	A	B	A	B	A	A	A	A	A	B	B	B	A	B	A	A	A	B	B	A	B	B	B	B	A	B	A	A	A	A	A	B	B	A	A	B	A	A	A	B	A	A	B	A	A	B	B	B
Chr1_bin365	108313512	A	B	A	B	A	A	A	A	A	B	B	B	A	B	A	A	A	B	B	A	B	B	B	B	A	B	A	A	A	A	A	B	B	A	A	B	A	A	A	B	A	A	B	A	A	B	B	B
Chr1_bin366	108421690	A	B	A	B	A	A	A	A	A	B	B	B	A	B	A	A	A	B	B	A	B	B	B	B	A	B	A	A	A	A	A	B	B	A	A	B	A	A	A	B	A	A	B	A	A	B	B	B
Chr1_bin367	108510001	A	B	A	B	A	A	A	A	A	B	B	B	A	B	A	A	A	B	B	A	B	B	B	B	A	B	A	A	A	A	A	B	B	A	A	B	A	A	A	B	A	A	A	A	A	B	B	B
Chr1_bin368	108634306	A	B	A	B	A	A	A	A	A	B	B	B	A	B	A	A	A	B	B	A	B	B	B	B	A	B	A	A	A	A	A	B	B	A	A	B	A	B	A	B	A	A	A	A	A	B	B	B
Chr1_bin369	108737995	A	B	A	B	A	A	A	A	A	B	B	B	A	B	A	A	A	B	B	A	B	B	B	B	A	B	A	A	A	A	A	B	B	A	A	B	A	B	A	B	A	A	A	A	A	B	B	B
Chr1_bin370	108806862	A	B	A	B	A	A	A	A	A	B	B	B	A	B	A	A	A	B	B	A	B	B	B	B	A	B	A	A	A	A	A	B	B	A	A	B	A	B	A	B	A	A	A	A	A	B	B	B
Chr1_bin371	109017928	A	B	A	B	A	A	A	A	A	B	B	B	A	B	A	A	A	B	B	A	B	B	B	B	A	B	A	A	A	A	A	B	B	A	A	B	A	B	A	B	A	A	A	A	A	B	B	B
Chr1_bin372	109099885	A	B	A	B	A	A	A	A	A	B	B	B	A	B	A	A	A	B	B	A	B	B	B	B	A	B	A	A	A	A	A	B	B	A	A	B	A	B	A	B	A	A	A	A	A	B	B	B
Chr1_bin373	109240770	A	B	A	B	A	A	A	A	A	B	B	B	A	B	A	A	A	B	B	A	B	B	B	B	A	B	A	A	A	A	A	B	B	A	A	A	A	B	A	B	A	A	A	A	A	B	B	B
Chr1_bin374	109317164	A	B	A	B	A	A	A	A	A	B	B	B	A	B	A	A	A	B	B	A	B	B	B	B	A	B	A	A	A	A	A	B	B	A	A	A	B	B	A	B	A	A	A	A	A	B	B	B
Chr1_bin375	109439875	A	B	A	B	A	A	B	A	A	B	B	B	A	B	A	A	A	B	B	A	B	B	B	B	A	B	A	A	A	A	A	B	B	A	A	A	B	B	A	B	A	A	A	A	A	B	B	B
Chr1_bin376	109544664	A	B	A	B	A	A	B	A	A	B	B	B	A	B	A	A	A	B	B	A	B	B	B	B	A	B	A	A	A	A	A	B	B	A	A	A	B	B	A	B	A	A	A	A	A	B	B	B
Chr1_bin377	109590525	A	B	A	B	A	A	B	A	A	B	B	B	A	B	A	A	A	B	B	A	B	B	B	B	A	B	A	A	A	A	A	B	B	A	A	A	B	B	A	B	A	A	A	A	A	B	B	B
Chr1_bin378	109734122	A	B	A	B	B	A	B	A	A	B	B	B	A	B	A	A	A	B	B	A	B	B	B	B	A	B	A	A	A	A	A	B	B	A	A	A	B	B	A	B	A	A	A	A	A	B	B	B
Chr1_bin379	109887079	A	B	A	B	B	A	B	A	A	B	B	B	A	B	A	A	A	B	B	A	B	B	B	B	A	B	A	A	A	A	A	B	B	A	A	A	B	B	A	B	A	A	A	A	A	B	A	B
Chr1_bin380	110019675	A	B	A	B	B	A	B	A	A	B	B	B	A	B	A	A	A	B	B	A	B	B	B	B	A	B	A	A	A	A	A	B	B	A	A	A	B	B	A	B	A	A	A	A	A	B	A	B
Chr1_bin381	110053114	A	B	A	B	B	A	B	A	A	B	B	B	A	B	A	A	A	B	B	A	B	B	B	B	A	B	A	A	A	A	A	B	B	A	A	A	B	B	A	B	A	A	A	A	A	B	A	A
Chr1_bin382	110432863	A	B	A	B	B	A	B	A	A	B	B	B	A	B	A	A	A	B	B	A	B	B	B	B	A	B	A	A	A	A	A	B	B	A	A	A	B	B	A	B	A	A	A	A	A	B	A	A
Chr1_bin383	110539515	A	B	A	B	B	A	B	A	A	B	B	B	A	B	A	A	A	B	B	A	B	B	B	B	A	B	A	A	A	A	A	B	B	A	A	A	B	B	A	B	A	A	A	A	A	A	A	A
Chr1_bin384	110632001	A	B	A	B	B	A	B	A	A	B	B	B	A	B	A	A	A	B	B	A	B	B	B	A	A	B	A	A	A	A	A	B	B	A	A	A	B	B	A	B	A	A	A	A	A	A	A	A
Chr1_bin385	110736244	A	B	A	B	B	A	B	A	A	B	B	B	A	B	A	A	A	B	B	A	B	B	B	A	A	B	A	A	A	A	A	B	B	A	A	A	B	B	A	B	A	A	A	A	A	A	A	A
Chr1_bin386	110819851	A	B	A	B	B	A	B	A	A	B	B	B	A	B	A	A	A	B	B	A	B	B	B	A	A	B	A	A	A	A	A	B	A	A	A	A	B	A	A	B	B	A	A	A	B	A	A	A
Chr1_bin387	110934656	A	B	A	B	B	A	B	A	A	B	B	B	A	B	A	A	A	B	B	A	B	B	B	A	A	B	A	A	A	A	A	B	A	A	A	A	B	A	A	B	B	A	A	A	B	A	A	A
Chr1_bin388	111003974	A	B	A	B	B	A	B	A	A	B	B	B	A	B	A	A	A	B	B	A	B	B	B	A	A	B	A	A	A	A	A	B	A	A	A	A	B	A	A	B	B	A	A	A	B	A	A	A
Chr1_bin389	111083030	A	B	A	B	B	A	B	A	A	B	B	B	A	B	A	A	A	B	B	A	B	B	B	A	A	B	A	A	A	A	A	B	A	A	A	A	B	A	A	B	B	A	A	A	B	A	A	A
Chr1_bin390	111316361	A	B	A	B	B	A	B	A	A	B	B	B	A	B	A	A	A	B	B	A	B	B	B	A	A	B	A	A	A	A	A	B	A	A	A	A	B	A	A	B	B	A	A	A	B	B	A	A
Chr1_bin391	111437912	A	B	A	B	B	A	B	A	A	B	B	B	A	B	A	A	A	B	B	A	B	B	B	A	A	B	A	A	A	A	A	B	A	A	A	A	B	A	A	B	B	A	A	A	B	B	A	A
Chr1_bin392	111551220	A	B	A	B	B	A	B	A	A	B	B	B	A	B	A	A	A	B	B	A	B	B	B	A	A	B	A	A	A	A	A	B	A	A	A	A	B	A	A	B	B	A	A	A	B	B	A	A
Chr1_bin393	111713408	A	B	A	B	B	A	B	A	A	B	B	B	A	B	A	A	A	B	B	A	B	B	B	A	A	B	A	A	A	A	A	B	A	A	A	A	B	A	A	B	B	A	A	A	B	B	A	A
Chr1_bin394	111835740	A	B	A	B	B	A	B	A	A	B	B	B	A	B	A	A	A	B	B	A	B	B	B	A	A	B	A	A	A	A	A	B	A	A	A	A	B	A	A	B	B	A	A	A	B	B	A	A
Chr1_bin395	112420854	A	B	A	B	B	A	B	A	A	B	B	B	A	B	A	A	A	B	B	A	B	B	B	A	A	B	A	A	A	A	A	B	A	A	A	A	B	A	A	B	B	A	A	A	B	B	A	A
Chr2_bin396	145630	A	A	B	A	A	A	B	B	A	B	B	A	B	B	A	B	B	B	A	B	B	A	B	B	B	B	A	B	B	A	B	B	B	A	A	B	A	A	A	B	A	A	B	B	A	A	B	B
Chr2_bin397	240529	A	A	B	A	A	A	B	B	A	B	B	A	B	B	A	B	B	B	A	B	B	A	B	B	B	B	A	B	B	A	B	B	B	A	A	B	A	A	A	B	A	A	B	B	A	A	B	B
Chr2_bin398	338703	A	A	B	A	A	A	B	B	A	B	B	A	B	B	A	B	B	B	A	B	B	A	B	B	B	B	A	B	B	A	B	B	B	A	A	B	A	A	A	B	A	A	B	B	A	A	B	B
Chr2_bin399	354306	A	A	B	A	A	A	B	B	A	B	B	A	A	B	A	B	B	B	A	B	B	A	B	B	B	B	A	B	A	A	B	B	B	B	A	B	A	A	A	B	A	A	B	B	A	A	B	B
Chr2_bin400	544417	A	A	B	A	A	A	B	B	A	B	B	A	A	B	A	B	B	B	A	B	B	A	B	B	B	B	A	B	A	A	B	B	B	B	A	B	A	A	A	B	A	A	B	B	A	A	B	B
Chr2_bin401	645814	A	A	B	A	A	A	B	B	A	B	B	A	A	B	A	B	B	B	A	A	A	A	B	B	B	B	A	B	A	A	B	B	B	B	A	B	A	A	A	B	A	B	B	B	A	A	B	B
Chr2_bin402	727779	A	A	B	A	A	A	B	B	A	B	B	A	A	B	A	B	B	B	A	A	A	A	B	B	B	B	A	B	A	A	B	B	B	B	A	B	A	A	A	B	A	B	B	B	A	A	B	B
Chr2_bin403	807258	A	A	B	A	A	A	B	B	A	B	B	A	A	B	A	B	B	B	A	A	A	A	B	B	B	B	A	B	A	A	B	B	B	B	A	B	A	A	A	B	A	B	B	B	A	A	B	B
Chr2_bin404	916572	A	A	B	A	A	A	B	B	A	B	B	A	A	B	A	B	B	B	A	A	A	A	B	B	B	B	A	B	A	A	B	B	B	B	B	B	A	A	A	B	A	B	B	B	A	A	B	B
Chr2_bin405	1040595	A	A	B	A	A	A	B	B	A	B	B	A	A	B	A	B	B	B	A	A	A	A	B	B	B	B	A	B	A	A	B	B	B	B	B	B	A	A	A	A	A	B	B	B	A	A	B	B
Chr2_bin406	1111619	A	A	B	A	A	A	A	B	A	B	B	A	A	B	A	B	B	B	A	A	A	A	B	B	B	B	A	B	A	A	B	B	B	B	B	B	A	A	A	A	A	B	B	B	A	A	B	B
Chr2_bin407	1226528	A	A	A	A	A	A	A	B	A	B	B	A	A	B	A	B	B	B	A	A	A	A	B	A	B	B	A	B	A	A	B	B	B	B	B	B	A	A	A	A	A	B	B	B	A	A	B	B
Chr2_bin408	1278230	A	A	A	A	A	A	A	B	A	B	B	A	A	B	A	B	B	B	A	A	A	A	B	A	B	B	A	B	A	A	B	B	B	B	B	B	A	A	A	A	A	B	B	B	A	A	B	B
Chr2_bin409	1436370	A	A	A	A	A	A	A	B	A	B	B	A	A	B	A	B	B	B	A	A	A	A	B	A	B	B	A	B	A	A	B	B	B	B	B	B	A	A	A	A	A	B	B	B	A	A	B	B
Chr2_bin410	1541207	A	A	A	A	A	A	A	B	A	B	B	A	A	B	A	B	B	B	A	A	A	A	B	A	B	B	A	B	A	A	B	B	B	B	B	B	A	A	A	A	A	B	B	B	A	A	B	B
Chr2_bin411	1646467	A	A	A	A	A	A	A	B	A	B	A	B	A	A	A	B	B	B	A	A	A	A	A	A	B	B	A	B	A	A	B	B	A	B	B	B	A	A	A	A	A	B	B	B	A	A	B	B
Chr2_bin412	1729755	B	A	A	A	A	A	A	A	A	B	A	B	A	A	A	A	A	B	A	A	A	A	A	A	B	B	A	B	A	A	B	B	A	B	B	B	A	A	A	A	A	B	B	B	A	A	B	B
Chr2_bin413	1847156	B	A	A	A	A	A	A	A	A	B	A	B	A	A	A	A	A	B	A	A	A	A	A	A	B	B	A	B	A	A	B	B	A	B	B	B	A	A	A	A	A	B	B	B	A	A	B	B
Chr2_bin414	1940085	B	A	A	A	A	A	A	A	A	B	A	B	A	A	A	A	A	B	A	A	A	A	A	A	B	B	A	B	B	A	B	B	A	B	B	B	A	A	A	A	A	B	B	B	A	A	B	B
Chr2_bin415	2048901	B	A	A	A	A	A	A	A	A	B	A	B	A	A	A	A	A	B	A	A	A	A	A	A	B	B	A	B	B	A	B	B	A	B	B	B	A	A	B	A	A	B	B	B	A	A	B	B
Chr2_bin416	2142186	B	A	A	A	A	A	A	A	A	B	A	B	A	A	A	A	A	B	A	A	A	A	A	A	B	B	A	B	B	A	B	B	A	B	B	B	A	A	B	A	A	B	B	B	A	A	B	B
Chr2_bin417	2225269	B	A	A	A	A	A	A	A	A	B	A	B	A	A	A	A	A	B	A	A	A	A	A	A	B	B	A	B	B	A	B	B	A	B	B	B	A	A	B	A	A	B	B	B	A	A	B	B
Chr2_bin418	2344320	B	A	A	A	A	A	A	A	A	B	A	B	A	A	A	A	A	B	A	A	A	A	A	A	B	B	A	B	B	A	B	B	A	B	B	B	A	A	B	A	A	B	B	B	A	A	B	B
Chr2_bin419	2413354	B	A	A	A	A	A	A	A	A	B	A	B	A	A	A	A	A	B	A	A	A	A	A	B	B	B	A	B	B	A	B	B	A	B	B	B	A	A	B	A	A	B	B	B	A	A	B	B
Chr2_bin420	2464160	B	A	A	A	A	A	A	A	A	B	A	B	A	A	A	A	A	B	A	A	A	A	A	B	B	B	A	B	B	A	B	B	A	B	B	B	A	A	B	A	A	B	B	B	A	A	B	B
Chr2_bin421	2645125	B	A	A	A	A	A	A	A	A	B	A	B	A	A	A	A	A	B	A	A	B	A	A	B	B	B	A	B	B	A	B	B	A	B	B	B	A	A	B	A	A	B	B	B	A	A	B	B
Chr2_bin422	2739665	B	A	A	A	A	A	A	A	A	B	A	B	A	A	A	A	A	B	A	A	B	A	A	B	B	B	A	B	B	A	B	B	A	B	B	B	A	A	B	A	A	B	B	B	A	A	B	B
Chr2_bin423	2840095	B	A	A	A	A	A	A	A	A	B	A	B	A	A	A	A	A	B	A	A	B	A	A	B	B	B	A	B	B	A	B	B	A	B	B	B	A	A	B	A	A	B	B	B	A	A	B	B
Chr2_bin424	2866626	B	A	A	A	A	A	A	A	A	B	A	B	A	A	A	A	A	B	A	A	B	A	A	B	B	B	A	B	B	A	B	B	A	B	B	B	A	A	B	A	A	B	B	B	A	A	B	B
Chr2_bin425	3032459	B	A	A	A	A	A	A	A	A	B	A	B	A	A	A	A	A	B	A	A	B	A	A	B	B	B	A	B	B	A	B	B	A	B	B	B	A	A	B	A	A	B	B	B	A	A	B	B
Chr2_bin426	3142497	B	A	A	A	A	A	A	A	A	B	A	B	A	A	A	A	A	B	A	A	B	A	A	B	B	B	A	B	B	A	B	B	A	B	B	B	A	A	B	A	A	B	B	B	A	A	B	B
Chr2_bin427	3234711	B	A	A	A	A	A	A	A	A	B	A	B	A	A	A	A	A	B	A	A	B	A	A	B	B	B	A	B	B	A	B	B	A	B	B	B	A	A	B	A	A	B	B	B	A	A	B	B
Chr2_bin428	3326229	B	A	A	A	A	A	A	A	A	B	A	B	A	A	A	A	A	B	A	A	B	A	A	B	B	A	A	B	B	A	B	B	A	B	B	B	A	A	B	A	A	B	B	B	B	A	B	B
Chr2_bin429	3433999	B	A	A	A	A	A	B	A	B	B	A	B	A	A	A	A	A	B	A	A	B	A	A	B	B	A	A	B	B	A	B	B	A	B	B	B	A	A	B	A	A	B	B	B	B	A	B	B
Chr2_bin430	3524275	B	A	A	A	A	A	B	A	B	B	A	B	A	A	A	A	A	B	A	A	B	A	A	B	B	A	A	B	B	A	B	B	A	B	B	B	A	A	B	A	A	B	B	B	B	A	B	B
Chr2_bin431	3636112	B	A	A	A	A	A	B	A	B	B	A	B	A	A	A	A	A	B	A	A	B	A	A	B	B	A	A	B	B	A	B	B	A	B	B	B	A	A	B	A	A	B	B	B	B	A	B	B
Chr2_bin432	3742256	B	A	A	A	A	A	B	A	B	B	A	B	A	A	A	A	A	B	A	A	B	A	A	B	B	A	A	B	B	A	B	B	A	B	B	B	A	A	B	A	A	B	B	B	B	A	B	B
Chr2_bin433	3767299	B	A	A	A	A	A	B	A	B	B	A	B	A	A	A	A	A	B	A	A	B	A	A	B	B	A	A	B	B	A	B	B	A	B	B	B	A	A	B	A	B	B	B	B	B	A	B	B
Chr2_bin434	4341536	B	A	A	A	A	A	B	A	B	B	A	B	A	A	A	A	A	B	A	A	B	A	A	B	B	A	A	B	B	A	B	B	A	B	B	B	A	A	B	A	B	B	B	B	B	A	B	B
Chr2_bin435	4434468	B	A	A	A	A	A	B	A	B	B	A	B	A	A	A	A	A	B	A	A	B	A	A	B	B	A	A	B	B	A	B	B	A	B	B	B	A	A	B	A	B	B	B	B	B	A	B	B
Chr2_bin436	4541859	B	A	A	A	A	A	B	A	B	B	A	B	A	A	A	A	A	B	A	A	B	A	A	B	B	A	A	B	B	A	B	B	A	B	B	B	A	A	B	A	B	B	B	B	B	A	B	B
Chr2_bin437	4646763	B	A	A	A	A	A	B	A	B	B	A	B	A	A	A	A	A	B	A	A	B	A	A	B	B	A	A	B	B	A	B	B	A	B	B	B	A	A	B	A	B	B	B	B	B	A	B	B
Chr2_bin438	4741499	B	A	A	A	A	A	B	A	B	B	A	B	A	A	A	A	A	B	A	A	B	A	A	B	B	A	A	B	B	A	B	B	A	B	B	B	A	A	B	A	B	B	B	B	B	A	B	B
Chr2_bin439	4840817	B	A	A	A	A	A	B	A	B	B	A	B	A	A	A	A	A	B	A	A	B	A	A	B	B	A	A	B	B	A	B	B	A	B	A	B	A	A	B	A	B	B	B	B	B	A	B	B
Chr2_bin440	4870685	B	A	A	A	A	A	B	A	B	A	A	B	A	A	A	A	A	B	A	A	B	A	A	B	B	A	A	B	B	A	B	B	A	B	A	B	A	B	B	A	B	B	B	B	B	A	B	B
Chr2_bin441	4962147	B	A	A	A	A	A	B	A	B	A	A	B	A	A	A	A	A	B	A	A	B	A	A	B	B	A	A	B	B	A	B	B	A	B	A	B	A	B	B	A	B	B	B	B	B	A	B	B
Chr2_bin442	5131136	B	A	A	A	A	A	B	A	B	A	A	B	A	A	A	A	A	B	A	A	B	A	A	B	B	A	A	B	B	A	B	B	A	B	A	B	A	B	B	A	B	B	B	B	B	A	B	B
Chr2_bin443	5236375	B	A	A	A	A	A	B	A	B	A	A	B	A	A	A	A	A	B	A	A	B	A	A	B	B	A	A	B	B	A	B	B	A	B	A	B	A	B	B	A	B	B	B	B	B	A	B	B
Chr2_bin444	5306250	B	A	A	A	A	A	B	A	B	A	A	B	A	A	A	A	A	B	A	A	B	A	A	B	B	A	A	B	B	A	B	B	A	B	A	B	A	B	B	A	B	B	B	B	B	A	B	B
Chr2_bin445	5424429	B	A	A	A	A	A	B	A	B	A	A	B	A	A	A	A	A	B	A	A	B	A	A	B	B	A	A	B	B	A	B	B	A	B	A	B	A	B	B	A	B	B	B	B	B	A	B	B
Chr2_bin446	5531329	B	A	A	A	A	A	B	A	B	A	A	B	A	A	A	A	A	B	A	A	B	A	A	B	B	A	A	B	B	A	B	B	B	B	A	B	A	B	B	A	B	B	B	B	B	A	B	B
Chr2_bin447	5598424	B	A	A	A	A	A	B	A	B	A	A	B	A	A	A	A	A	B	A	A	B	A	A	B	B	A	A	B	B	A	B	B	B	B	A	B	A	B	B	A	B	B	B	B	B	A	B	A
Chr2_bin448	5734444	B	A	A	A	A	A	A	A	B	A	A	B	A	A	A	A	A	B	A	A	B	A	A	B	B	A	A	B	B	A	B	B	B	B	A	B	A	B	B	A	B	B	B	A	B	A	B	A
Chr2_bin449	5845473	B	A	A	A	A	A	A	A	B	A	A	B	A	A	A	A	A	B	A	A	B	A	A	B	B	A	A	B	B	A	B	B	B	B	A	B	A	B	B	A	A	B	B	A	B	A	B	A
Chr2_bin450	6114056	B	A	A	A	A	A	A	A	B	A	A	B	A	A	A	A	A	B	A	A	B	A	A	B	B	A	A	B	B	A	B	B	B	B	A	B	A	B	B	A	A	B	B	A	A	A	B	A
Chr2_bin451	6182063	B	A	A	A	A	A	A	A	B	A	A	B	A	A	A	A	A	B	A	A	B	A	A	B	B	A	A	B	B	A	B	B	B	B	A	B	A	B	B	A	A	B	B	A	A	A	B	A
Chr2_bin452	6347065	B	A	A	A	A	A	A	A	B	A	A	B	A	A	A	A	A	B	A	A	B	A	A	B	B	A	A	B	B	A	B	B	B	B	A	B	A	B	B	A	A	B	B	A	A	A	B	A
Chr2_bin453	6449430	B	A	A	A	A	A	A	A	B	A	A	B	A	A	B	A	A	B	A	A	B	A	A	B	B	A	A	B	B	A	B	B	B	B	A	B	A	B	B	A	A	B	B	B	A	A	B	A
Chr2_bin454	6544537	B	A	A	A	A	A	A	A	B	A	A	B	A	A	B	A	A	B	A	A	B	A	A	B	B	A	A	B	B	A	B	B	B	B	A	B	A	B	B	A	A	B	B	B	A	A	B	A
Chr2_bin455	6623451	B	A	A	A	A	A	A	A	B	A	A	B	A	A	B	A	A	B	A	A	B	A	A	B	B	A	A	B	B	A	B	B	B	B	A	B	A	B	B	A	A	B	B	B	A	A	B	A
Chr2_bin456	6667455	B	A	A	A	A	A	A	A	B	A	A	B	A	A	B	A	A	B	A	A	B	A	A	B	B	A	A	B	B	A	B	B	B	B	A	B	A	B	B	A	A	B	B	B	A	A	B	A
Chr2_bin457	6815279	B	A	A	A	A	A	A	A	B	A	A	B	A	A	B	A	A	B	A	A	B	A	A	B	B	A	A	B	A	A	B	B	B	B	A	B	A	B	B	A	A	B	B	B	A	A	B	A
Chr2_bin458	6874031	B	A	A	A	A	A	A	A	B	A	A	B	A	A	B	A	A	B	A	A	B	A	A	B	B	A	A	B	A	A	B	B	B	B	A	B	A	B	B	A	A	B	B	B	A	A	B	A
Chr2_bin459	7145373	B	A	A	A	A	A	A	A	B	A	A	B	A	A	B	A	A	B	A	A	B	A	A	B	B	A	A	B	A	A	B	B	B	B	A	B	A	B	B	A	A	B	B	B	A	A	B	A
Chr2_bin460	7231092	B	A	A	A	A	A	A	A	B	A	A	B	A	A	B	A	A	B	A	A	B	A	A	B	B	A	A	B	A	A	B	B	B	B	A	B	A	B	B	A	A	B	B	B	A	A	B	A
Chr2_bin461	7346599	B	A	A	A	A	A	A	A	B	A	A	B	A	A	B	A	A	B	A	A	B	A	A	B	B	A	A	B	A	A	B	B	B	B	A	B	A	B	B	A	A	B	B	B	A	A	B	A
Chr2_bin462	7542971	B	A	A	A	A	A	A	A	B	A	A	B	A	A	B	A	A	B	A	A	B	A	A	B	B	A	A	B	A	A	B	B	B	B	A	B	A	B	B	A	A	B	B	B	A	A	B	A
Chr2_bin463	7628887	B	A	A	A	A	A	A	A	B	A	A	B	A	A	B	A	A	B	A	A	B	A	A	B	B	A	A	B	A	A	B	B	B	B	A	B	A	B	B	A	A	B	B	B	A	A	B	A
Chr2_bin464	7735732	B	A	A	A	A	A	A	A	B	A	A	B	A	A	B	A	A	B	A	A	B	A	A	B	B	A	A	B	A	A	B	B	B	B	A	B	A	B	B	A	A	B	B	B	A	A	B	A
Chr2_bin465	7775095	B	A	A	A	A	A	A	A	B	A	A	B	A	A	B	A	A	B	A	A	B	A	A	B	B	A	A	B	A	A	B	B	B	B	A	B	A	B	B	A	A	B	B	B	A	A	B	A
Chr2_bin466	7885832	B	A	B	A	A	A	A	A	B	A	A	B	A	A	B	A	A	B	A	A	B	A	A	B	B	A	A	B	A	A	B	B	B	B	A	B	A	B	B	A	A	B	B	B	A	A	B	A
Chr2_bin467	8077326	B	A	B	A	A	A	A	A	B	A	A	B	A	A	B	A	A	B	A	A	B	A	A	B	B	A	A	B	A	A	B	B	B	B	A	B	A	B	B	A	A	B	B	B	A	A	B	A
Chr2_bin468	8202743	B	A	B	A	A	A	A	A	B	A	A	B	A	A	B	A	A	A	A	A	B	A	A	B	B	A	A	B	A	A	B	B	B	B	A	B	A	B	B	A	A	B	B	B	A	A	B	A
Chr2_bin469	8408216	B	A	B	A	A	A	A	A	B	A	A	B	A	A	B	A	A	A	A	A	B	A	A	B	B	A	A	B	A	A	B	B	B	B	A	B	A	B	B	A	A	B	B	B	A	A	B	A
Chr2_bin470	8724442	B	A	B	A	A	A	A	A	B	A	A	B	A	A	B	A	A	A	A	A	B	A	A	B	B	A	A	B	A	A	B	B	B	B	A	B	A	B	B	A	A	B	B	B	A	A	B	A
Chr2_bin471	8822049	B	A	B	A	A	A	A	A	B	A	A	B	A	A	B	A	A	A	A	A	B	A	A	B	B	A	A	B	A	A	B	B	B	B	A	B	A	B	B	A	A	B	B	B	A	A	B	A
Chr2_bin472	8898356	B	A	B	A	A	A	A	A	B	A	A	B	A	A	B	A	A	A	A	A	B	A	A	B	B	A	A	B	A	A	B	B	B	B	A	B	A	B	B	A	A	B	B	B	A	A	B	A
Chr2_bin473	9045182	B	A	B	A	A	A	A	A	B	A	A	B	A	A	B	A	A	A	A	A	B	A	A	B	B	A	A	B	A	A	B	B	B	B	A	B	A	B	B	A	A	B	B	B	A	A	B	B
Chr2_bin474	9092841	B	A	B	A	A	A	A	A	B	A	A	B	A	A	B	A	A	A	A	A	B	A	A	B	B	A	A	B	A	A	B	B	B	B	A	B	A	B	B	A	A	B	B	B	A	A	B	B
Chr2_bin475	9249583	B	A	B	A	A	A	A	A	B	A	A	B	A	A	B	A	A	A	A	A	B	A	A	B	B	A	A	B	A	A	B	B	B	B	A	B	A	B	B	A	A	B	B	B	A	A	B	B
Chr2_bin476	9254976	B	A	B	A	A	A	A	A	B	A	A	B	A	A	B	A	A	A	A	A	B	A	A	B	B	A	A	B	A	A	B	B	B	B	A	B	A	B	B	A	A	B	B	B	A	A	B	B
Chr2_bin477	9741574	B	A	B	A	A	A	A	A	B	A	A	B	A	A	B	A	A	A	A	A	B	A	A	B	B	A	A	B	A	A	B	B	B	B	A	B	A	B	B	A	A	B	B	B	A	A	B	B
Chr2_bin478	9807294	B	A	B	A	A	A	A	A	B	A	A	B	A	A	B	A	A	A	A	A	B	A	A	B	B	A	A	B	A	A	B	B	B	B	A	B	A	B	B	A	A	B	B	B	A	A	B	B
Chr2_bin479	9881294	B	A	B	A	A	A	A	A	B	A	A	B	A	A	B	A	A	A	A	A	B	A	A	B	B	A	A	B	A	A	B	B	B	B	A	B	A	B	B	A	A	B	B	B	A	A	B	B
Chr2_bin480	10429831	B	A	B	A	A	A	A	A	B	A	A	B	A	A	B	A	A	A	A	A	B	A	A	B	B	A	A	B	A	A	B	B	B	B	A	B	A	B	B	A	A	B	B	B	A	A	B	B
Chr2_bin481	10635042	B	A	B	A	A	A	A	A	B	A	A	B	A	A	B	A	A	A	A	A	B	A	A	B	B	A	A	B	A	A	B	B	B	B	A	B	A	B	B	A	A	B	B	B	A	A	B	B
Chr2_bin482	11143621	B	A	B	A	A	A	A	A	B	A	A	B	A	A	B	B	B	A	A	A	B	A	A	B	B	A	A	B	A	A	B	B	B	B	A	B	A	B	B	A	A	B	B	B	A	A	B	B
Chr2_bin483	11605614	B	A	B	A	A	A	A	A	B	A	A	B	A	A	B	B	B	A	A	A	B	A	A	B	B	A	A	B	A	A	B	B	B	B	A	B	A	B	B	A	A	B	B	B	A	A	B	B
Chr2_bin484	12333547	B	A	B	A	A	A	A	A	B	A	A	B	A	A	B	B	B	A	A	A	B	A	A	B	B	A	A	B	A	A	B	B	B	B	A	B	A	B	B	A	A	B	B	B	A	A	B	B
Chr2_bin485	12470622	B	A	B	A	A	A	A	A	B	A	A	B	A	A	B	B	B	A	A	A	B	A	A	B	B	A	A	B	A	A	B	B	B	B	A	B	A	B	B	A	A	B	B	B	A	A	B	B
Chr2_bin486	12569904	B	A	B	A	A	A	A	A	B	A	A	B	A	A	B	B	B	A	A	A	B	A	A	B	B	A	A	B	A	A	B	B	B	B	A	B	A	B	B	A	A	B	B	B	A	A	B	B
Chr2_bin487	12701678	B	A	B	A	A	A	A	A	B	A	A	B	A	A	B	B	B	A	A	A	B	A	A	B	B	A	A	B	A	A	B	B	B	B	A	B	A	B	B	A	A	B	B	B	A	A	B	B
Chr2_bin488	12938101	B	A	B	A	A	A	A	A	B	A	A	B	A	A	B	B	B	A	A	A	B	A	A	B	B	A	A	B	A	A	B	B	B	B	A	B	A	B	B	A	A	B	B	B	A	A	B	B
Chr2_bin489	13046838	B	A	B	A	A	A	A	A	B	A	A	B	A	A	B	B	B	A	A	A	B	A	A	B	B	A	A	B	A	A	B	B	B	B	A	B	A	B	A	A	A	B	B	B	A	A	B	B
Chr2_bin490	13601208	B	A	B	A	A	A	A	A	B	A	A	B	A	A	B	B	B	A	A	A	B	A	A	B	B	A	A	B	A	A	B	B	B	B	A	B	A	B	A	A	A	B	B	B	A	A	B	B
Chr2_bin491	13972415	B	A	B	A	A	A	A	A	B	A	A	B	A	A	B	B	B	A	A	A	B	A	A	B	B	A	A	B	A	A	B	B	B	B	A	B	A	B	A	A	A	B	B	B	A	A	B	B
Chr2_bin492	14498036	B	A	B	A	A	A	A	A	B	A	A	B	A	A	B	B	B	A	A	A	B	A	A	B	B	A	A	B	A	A	B	B	B	B	A	B	A	B	A	A	A	B	B	B	A	A	B	B
Chr2_bin493	14830909	B	A	B	A	A	A	A	A	B	A	A	B	A	A	B	B	B	A	A	A	B	A	A	B	B	A	A	B	A	A	B	B	B	B	A	B	A	B	A	A	A	B	B	B	A	A	B	B
Chr2_bin494	14853371	B	A	B	A	A	A	A	A	B	A	A	B	A	A	B	B	B	A	A	A	B	A	A	B	B	A	A	B	A	A	B	B	B	B	A	B	A	B	A	A	A	B	B	B	A	A	B	B
Chr2_bin495	17924133	B	A	B	A	A	A	A	A	B	A	A	B	A	A	B	B	B	A	A	A	B	A	A	B	B	A	A	B	A	A	B	B	B	B	A	B	A	B	A	A	A	B	B	B	A	A	B	B
Chr2_bin496	18528115	B	A	B	A	A	A	A	A	B	A	A	B	A	A	B	B	B	A	A	A	B	A	A	B	B	A	A	B	A	A	B	B	B	B	A	B	A	B	A	A	A	B	B	B	A	A	B	B
Chr2_bin497	19261605	B	A	B	A	A	A	A	A	B	A	A	B	A	A	B	B	B	A	A	A	B	A	A	B	B	A	A	B	A	A	B	B	B	B	A	B	A	B	A	A	A	B	B	B	A	A	B	B
Chr2_bin498	19927969	B	A	B	A	A	A	A	A	B	A	A	B	A	A	B	B	B	A	A	A	B	A	A	B	B	A	A	B	A	A	B	B	B	B	A	B	A	B	A	A	A	B	B	B	A	A	B	B
Chr2_bin499	21304018	B	A	B	A	A	A	A	A	B	A	A	B	A	A	B	B	B	A	A	A	B	A	A	B	B	A	A	B	A	A	B	B	B	B	A	B	A	B	A	A	A	B	B	B	A	A	B	B
Chr2_bin500	22317647	B	A	B	A	A	A	A	A	B	A	A	B	A	A	B	B	B	A	A	A	B	A	A	B	B	A	A	B	A	A	B	B	B	B	A	B	A	B	A	A	A	B	B	B	A	A	B	B
Chr2_bin501	24183025	B	A	B	A	A	A	A	A	B	A	A	B	A	A	B	B	B	A	A	A	B	A	A	B	B	A	A	B	A	A	B	B	B	B	A	B	A	B	A	A	A	B	B	B	A	A	B	B
Chr2_bin502	24954616	B	A	B	A	A	A	A	A	B	A	A	B	A	A	B	B	B	A	A	A	B	A	A	B	B	A	A	B	A	A	B	B	B	B	A	B	A	B	A	A	A	B	B	B	A	A	B	B
Chr2_bin503	27625302	B	A	B	A	A	A	A	A	B	A	A	B	A	A	B	B	B	A	A	A	B	A	A	B	B	A	A	B	A	A	B	B	B	B	A	B	A	B	A	A	A	B	B	B	A	A	B	B
Chr2_bin504	27994099	B	A	B	A	A	A	A	A	B	A	A	B	A	A	B	B	B	A	A	A	B	A	A	B	B	A	A	B	A	A	B	B	B	B	A	B	A	B	A	A	A	B	B	B	A	A	B	B
Chr2_bin505	28272449	B	A	B	A	A	A	A	A	B	A	A	B	A	A	B	B	B	A	A	A	B	A	A	B	B	A	A	B	A	A	B	B	B	B	A	B	A	B	A	A	A	B	B	B	A	A	B	B
Chr2_bin506	29586329	B	A	B	A	A	A	A	A	B	A	A	B	A	A	B	B	B	A	A	A	B	A	A	B	B	A	A	B	A	A	B	B	B	B	A	B	A	B	A	A	A	B	B	B	A	A	B	B
Chr2_bin507	29943479	B	A	B	A	A	A	A	A	B	A	A	B	A	A	B	B	B	A	A	A	B	A	A	B	B	A	A	B	A	A	B	B	B	B	A	B	A	B	A	A	A	B	B	B	A	A	B	B
Chr2_bin508	30798082	B	A	B	A	A	A	A	A	B	A	A	B	A	A	B	B	B	A	A	A	B	A	A	B	B	A	A	B	A	A	B	B	B	B	A	B	A	B	A	A	A	B	B	B	A	A	B	B
Chr2_bin509	31188503	B	A	B	A	A	A	A	A	B	A	A	B	A	A	B	B	B	A	A	A	B	A	A	B	B	A	A	B	A	A	B	B	B	B	A	B	A	B	A	A	A	B	B	B	A	A	B	B
Chr2_bin510	31352294	B	A	B	A	A	A	A	A	B	A	A	B	A	A	B	B	B	A	A	A	B	A	A	B	B	A	A	B	A	A	B	B	B	B	A	B	A	B	A	A	A	B	B	B	A	A	B	B
Chr2_bin511	31878552	B	A	B	A	A	A	A	A	B	A	A	B	A	A	B	B	B	A	A	A	B	A	A	B	B	A	A	B	A	A	B	B	B	B	A	B	A	B	A	A	A	B	B	B	A	A	B	B
Chr2_bin512	33917682	B	A	B	A	A	A	A	A	B	A	A	B	A	A	B	B	B	A	A	A	B	A	A	B	B	A	A	B	A	A	B	B	B	B	A	B	A	B	A	A	A	B	B	B	A	A	B	B
Chr2_bin513	34346924	B	A	B	A	A	A	A	A	B	A	A	B	A	A	B	B	B	A	A	A	B	A	A	B	B	A	A	B	A	A	B	B	B	B	A	B	A	B	A	A	A	B	B	B	A	A	B	B
Chr2_bin514	35797607	B	A	B	A	A	A	A	A	B	A	A	B	A	A	B	B	B	A	A	A	B	A	A	B	B	A	A	B	A	A	B	B	B	B	A	B	A	B	A	A	A	B	B	B	A	A	B	B
Chr2_bin515	36539566	B	A	B	A	A	A	A	A	B	A	A	B	A	A	B	B	B	A	A	A	B	A	A	B	B	A	A	B	A	A	B	B	B	B	A	B	A	B	A	A	A	B	B	B	A	A	B	B
Chr2_bin516	36846173	B	A	B	A	A	A	A	A	B	A	A	B	A	A	B	B	B	A	A	A	B	A	A	B	B	A	A	B	A	A	B	B	B	B	A	B	A	B	A	A	A	B	B	B	A	A	B	B
Chr2_bin517	36865181	B	A	B	A	A	A	A	A	B	A	A	B	A	A	B	B	B	B	A	A	B	A	A	B	B	A	A	B	A	A	B	B	B	B	A	B	A	B	A	A	A	B	B	B	A	A	B	B
Chr2_bin518	37512747	B	A	B	A	A	A	A	A	B	A	A	B	A	A	B	B	B	B	A	A	B	A	A	B	B	A	A	B	A	A	B	B	B	B	A	B	A	B	A	A	A	B	B	B	A	A	B	B
Chr2_bin519	37678214	B	A	B	A	A	A	A	A	B	A	A	B	A	A	B	B	B	B	A	A	B	A	A	B	B	A	A	B	A	A	B	B	B	B	A	B	A	B	A	A	A	B	B	B	A	A	B	B
Chr2_bin520	37986045	B	A	B	A	A	A	A	A	B	A	A	B	A	A	B	B	B	B	A	A	B	A	A	B	B	A	A	B	A	A	B	B	B	B	A	B	A	B	A	A	A	B	B	B	A	A	B	B
Chr2_bin521	38085147	B	A	B	A	A	A	A	A	B	A	A	B	A	A	B	B	B	B	A	A	B	A	A	B	B	A	A	B	A	A	B	B	B	B	A	B	A	B	A	A	A	B	B	B	A	A	B	B
Chr2_bin522	38287419	B	A	B	A	A	A	A	A	B	A	A	B	A	A	B	B	B	B	A	A	B	A	A	B	B	A	A	B	A	A	B	B	B	B	A	B	A	B	A	A	A	B	B	B	A	A	B	B
Chr2_bin523	38710919	B	A	B	A	A	A	A	A	B	A	A	B	A	A	B	B	B	B	A	A	B	A	A	B	B	A	A	B	A	A	B	B	B	B	A	B	A	B	A	A	A	B	B	B	A	A	B	B
Chr2_bin524	38755576	B	A	B	A	A	A	A	A	B	A	A	B	A	A	B	B	B	B	A	A	B	A	A	B	B	A	A	B	A	A	B	B	B	B	A	B	A	B	A	A	A	B	B	B	A	A	B	B
Chr2_bin525	39545461	B	A	B	A	A	A	A	A	B	A	A	B	A	A	B	B	B	B	A	A	B	A	A	B	B	A	A	B	A	A	B	B	B	B	A	B	A	B	A	A	A	B	B	B	A	A	B	B
Chr2_bin526	39565683	B	A	B	A	A	A	A	A	B	A	A	B	A	A	B	B	B	B	A	A	B	A	A	B	B	A	A	B	A	A	B	B	B	B	A	B	A	B	A	A	A	B	B	B	A	A	B	B
Chr2_bin527	40107218	B	A	B	A	A	A	A	A	B	A	A	B	A	A	B	B	B	B	A	A	B	A	A	B	B	A	A	B	A	A	B	B	B	B	A	B	A	B	A	A	A	B	B	B	A	A	B	B
Chr2_bin528	40945689	B	A	B	A	A	A	A	A	B	A	A	B	A	A	B	B	B	B	A	A	B	A	A	B	B	A	A	B	A	A	B	B	B	B	A	B	A	B	A	A	A	B	B	B	A	A	B	B
Chr2_bin529	41279911	B	A	B	A	A	A	A	A	B	A	A	B	A	A	B	B	B	B	A	A	B	A	A	B	B	A	A	B	A	A	B	B	B	B	A	B	A	B	A	A	A	B	B	B	A	A	B	B
Chr2_bin530	41982761	B	A	B	A	A	A	A	A	B	A	A	B	A	A	B	B	B	B	A	A	B	A	A	B	B	A	A	B	A	A	B	B	B	B	A	B	A	B	A	A	A	B	B	B	A	A	B	B
Chr2_bin531	42796284	B	A	B	A	A	A	A	A	B	A	A	B	A	A	B	B	B	B	A	A	B	A	A	B	B	A	A	B	A	A	B	B	B	B	A	B	A	B	A	A	A	B	B	B	A	A	B	B
Chr2_bin532	43347971	B	A	B	A	A	A	A	A	B	A	A	B	A	A	B	B	B	B	A	A	B	A	A	B	B	A	A	B	A	A	B	B	B	B	A	B	A	B	A	A	A	B	B	B	A	A	B	B
Chr2_bin533	43887919	B	A	B	A	A	A	A	A	B	A	A	B	A	A	B	B	B	B	A	A	B	A	A	B	B	A	A	B	A	A	B	B	B	B	A	B	A	B	A	A	A	B	B	B	A	A	B	B
Chr2_bin534	44639832	B	A	B	A	A	A	A	A	B	A	A	B	A	A	B	B	B	B	A	A	B	A	A	B	B	A	A	B	A	A	B	B	B	B	A	B	A	B	A	A	A	B	B	B	A	A	B	B
Chr2_bin535	45043238	B	A	B	A	A	A	A	A	B	A	A	B	A	A	B	B	B	B	A	A	B	A	A	B	B	A	A	B	A	A	B	B	B	B	A	B	A	B	A	A	A	B	B	B	A	A	B	B
Chr2_bin536	45131805	B	A	B	A	A	A	A	A	B	A	A	B	A	A	B	B	B	B	A	A	B	A	A	B	B	A	A	B	A	A	B	B	B	B	A	B	A	B	A	A	A	B	B	B	A	A	B	B
Chr2_bin537	47328143	B	A	B	A	A	A	A	A	B	A	A	B	A	A	B	B	B	A	A	A	B	A	A	B	B	A	A	B	A	A	B	B	B	B	A	B	A	B	A	A	A	B	B	B	A	A	B	B
Chr2_bin538	47493305	B	A	B	A	A	A	A	A	B	A	A	B	A	A	B	B	B	A	A	A	B	A	A	B	B	A	A	B	A	A	B	B	B	B	A	B	A	B	A	A	A	B	B	B	A	A	B	B
Chr2_bin539	49123194	B	A	B	A	A	A	A	A	B	A	A	B	A	A	B	B	B	A	A	A	B	A	A	B	B	A	A	B	A	A	B	B	B	B	A	B	A	B	A	A	A	B	B	B	A	A	B	B
Chr2_bin540	49616515	B	A	B	A	A	A	A	A	B	A	A	B	A	A	B	B	B	A	A	A	B	A	A	B	B	A	A	B	A	A	B	B	B	B	A	B	A	B	A	A	A	B	B	B	A	A	B	B
Chr2_bin541	49944108	B	A	B	A	A	A	A	A	B	A	A	B	A	A	B	B	B	A	A	A	B	A	A	B	B	A	A	B	A	A	B	B	B	B	A	B	A	B	A	A	A	B	B	B	A	A	B	B
Chr2_bin542	52705442	B	A	B	A	A	A	A	A	B	A	A	B	A	A	B	B	B	A	A	A	B	A	A	B	B	A	A	B	A	A	B	B	B	B	A	B	A	B	A	A	A	B	B	B	A	A	B	B
Chr2_bin543	53304708	B	A	B	A	A	A	A	A	B	A	A	B	A	A	B	B	B	A	A	A	B	A	A	B	B	A	A	B	A	A	B	B	B	B	A	B	A	B	A	A	A	B	B	B	A	A	B	B
Chr2_bin544	53497979	B	A	B	A	A	A	A	A	B	A	A	B	A	A	B	B	B	A	A	A	B	A	A	B	B	A	A	B	A	A	B	B	B	B	A	B	A	B	A	A	A	B	B	B	A	A	B	B
Chr2_bin545	53602827	B	A	B	A	A	A	A	A	B	A	A	B	A	A	B	B	B	A	A	A	B	A	A	B	B	A	A	B	A	A	B	B	B	B	A	B	A	B	A	A	A	B	B	B	A	A	B	B
Chr2_bin546	54228224	B	A	B	A	A	A	A	A	B	A	A	B	A	A	B	B	B	A	A	A	B	A	A	B	B	A	A	B	A	A	B	B	B	B	A	B	A	B	A	A	A	B	B	B	A	A	B	B
Chr2_bin547	54254068	B	A	B	A	A	A	A	A	B	A	A	B	A	A	B	B	B	A	A	A	B	A	A	B	B	A	A	B	A	A	B	B	B	B	A	B	A	B	A	A	A	B	B	B	A	A	B	B
Chr2_bin548	55449889	B	A	B	A	A	A	A	A	B	A	A	B	A	A	B	B	B	A	A	A	B	A	A	B	B	A	A	B	A	A	B	B	B	B	A	B	A	B	A	A	A	B	B	B	A	A	B	B
Chr2_bin549	56461332	B	A	B	A	A	A	A	A	B	A	A	B	A	A	B	B	B	A	A	A	B	A	A	B	B	A	A	B	A	A	B	B	B	B	A	B	A	B	A	A	A	B	B	B	A	A	B	B
Chr2_bin550	56947020	B	A	B	A	A	A	A	A	B	A	A	B	A	A	B	B	B	A	A	A	B	A	A	B	B	A	A	B	A	A	B	B	B	B	A	B	A	B	A	A	A	B	B	B	A	A	B	B
Chr2_bin551	57120737	B	A	B	A	A	A	A	A	B	A	A	B	A	A	B	B	B	A	A	A	B	A	A	B	B	A	A	B	A	A	B	B	B	B	A	B	A	B	A	A	A	B	B	B	A	A	B	B
Chr2_bin552	57216657	B	A	B	A	A	A	A	A	B	A	A	B	A	A	B	B	B	A	A	A	B	A	A	B	B	A	A	B	A	A	B	B	B	B	A	B	A	B	A	A	A	B	B	B	A	A	B	B
Chr2_bin553	57317735	B	A	B	A	A	A	A	A	B	A	A	B	A	A	B	B	B	A	A	A	B	A	A	B	B	A	A	B	A	A	B	B	B	B	A	B	A	B	A	A	A	B	B	B	A	A	B	B
Chr2_bin554	57734632	B	A	B	A	A	A	A	A	B	A	A	B	A	A	B	B	B	A	A	A	B	A	A	B	B	A	A	B	A	A	B	B	B	B	A	B	A	B	A	A	A	B	B	B	A	A	B	B
Chr2_bin555	58505588	B	A	B	A	A	A	A	A	B	A	A	B	A	A	B	B	B	A	A	A	B	A	A	B	B	A	A	B	A	A	B	B	B	B	A	B	A	B	A	A	A	B	B	B	A	A	B	B
Chr2_bin556	58839070	B	A	B	A	A	A	A	A	B	A	A	B	A	A	B	B	B	A	A	A	B	A	A	B	B	A	A	B	A	A	B	B	B	B	A	B	A	B	A	A	A	B	B	B	A	A	B	B
Chr2_bin557	59164850	B	A	B	A	A	A	A	A	B	A	A	B	A	A	B	B	B	A	A	A	B	A	A	B	B	A	A	B	A	A	B	B	B	B	A	B	A	B	A	A	A	B	B	B	A	A	B	B
Chr2_bin558	59753182	B	A	B	A	A	A	A	A	B	A	A	B	A	A	B	B	B	A	A	A	B	A	A	B	B	A	A	B	A	A	B	B	B	B	A	B	A	B	A	A	A	B	B	B	A	A	B	B
Chr2_bin559	60292031	B	A	B	A	A	A	A	A	B	A	A	B	A	A	B	B	B	A	A	A	B	A	A	B	B	A	A	B	A	A	B	B	B	B	A	B	A	B	A	A	A	B	B	B	A	A	B	B
Chr2_bin560	60470878	B	A	B	A	A	A	A	A	B	A	A	B	A	A	B	B	B	A	A	A	B	A	A	B	B	A	A	B	A	A	B	B	B	B	A	B	A	B	A	A	A	B	B	B	A	A	B	B
Chr2_bin561	61635999	B	A	B	A	A	A	A	A	B	A	A	B	A	A	B	B	B	A	A	A	B	A	A	B	B	A	A	B	A	A	B	B	B	B	A	B	A	B	A	A	A	B	B	B	A	A	B	B
Chr2_bin562	62634417	B	A	B	A	A	A	A	A	B	A	A	B	A	A	B	B	B	A	A	A	B	A	A	B	B	A	A	B	A	A	B	B	B	B	A	B	A	B	A	A	A	B	B	B	A	A	B	B
Chr2_bin563	65780905	B	A	B	A	A	A	A	A	B	A	A	B	A	A	B	B	B	A	A	A	B	A	A	B	B	A	A	B	A	A	B	B	B	B	A	B	A	B	A	A	A	B	B	B	A	A	B	B
Chr2_bin564	66161551	B	A	B	A	A	A	A	A	B	A	A	B	A	A	B	B	B	A	A	A	B	A	A	B	B	A	A	B	A	A	B	B	B	B	A	B	A	B	A	A	A	B	B	B	A	A	B	B
Chr2_bin565	66929466	B	A	B	A	A	A	A	A	B	A	A	B	A	A	B	B	B	A	A	A	B	A	A	B	B	A	A	B	A	A	B	B	B	B	A	B	A	B	A	A	A	B	B	B	A	A	B	B
Chr2_bin566	67033353	B	A	B	A	A	A	A	A	B	A	A	B	A	A	B	B	B	A	A	A	B	A	A	B	B	A	A	B	A	A	B	B	B	B	A	B	A	B	A	A	A	B	B	B	A	A	B	B
Chr2_bin567	67504765	B	A	B	A	A	A	A	A	B	A	A	B	A	A	B	B	B	A	A	A	B	A	A	B	B	A	A	B	A	A	B	B	B	B	A	B	A	B	A	A	A	B	B	B	A	A	B	B
Chr2_bin568	67892845	B	A	B	A	A	A	A	A	B	A	A	B	A	A	B	B	B	A	A	A	B	A	A	B	B	A	A	B	A	A	B	B	B	B	A	B	A	B	A	A	A	B	B	B	A	A	B	B
Chr2_bin569	68384487	B	A	B	A	A	A	A	A	B	A	A	B	A	A	B	B	B	A	A	A	B	A	A	B	B	A	A	B	A	A	B	B	B	B	A	B	A	B	A	A	A	B	B	B	A	A	B	B
Chr2_bin570	68906429	B	A	B	A	A	A	A	A	B	A	A	B	A	A	B	B	B	A	A	A	B	A	A	B	B	A	A	B	A	A	B	B	B	B	A	B	A	B	A	A	A	B	B	B	A	A	B	B
Chr2_bin571	69192165	B	A	B	A	A	A	A	A	B	A	A	B	A	A	B	B	B	A	A	A	B	A	A	B	B	A	A	B	A	A	B	B	B	B	A	B	A	B	A	A	A	B	B	B	A	A	B	B
Chr2_bin572	70525504	B	A	B	A	A	A	A	A	B	A	A	B	A	A	B	B	B	A	A	A	B	A	A	B	B	A	A	B	A	A	B	B	B	B	A	B	A	B	A	A	A	B	B	B	A	A	B	B
Chr2_bin573	70877844	B	A	B	A	A	A	A	A	B	A	A	B	A	A	B	B	B	A	A	A	B	A	A	B	B	A	A	B	A	A	B	B	B	B	A	B	A	B	A	A	A	B	B	B	A	A	B	B
Chr2_bin574	70956258	B	A	B	A	A	A	A	A	B	A	A	B	A	A	B	B	B	A	A	A	B	A	A	B	B	A	A	B	A	A	B	B	B	B	A	B	A	B	A	A	A	B	B	B	A	A	B	B
Chr2_bin575	71928188	B	A	B	A	A	A	A	A	B	A	A	B	A	A	B	B	B	A	A	A	B	A	A	B	B	A	A	B	A	A	B	B	B	B	A	B	A	B	A	A	A	B	B	B	A	A	B	B
Chr2_bin576	72251014	B	A	B	A	A	A	A	A	B	A	A	B	A	A	B	B	B	A	A	A	B	A	A	B	B	A	A	B	A	A	B	B	B	B	A	B	A	B	A	A	A	B	B	B	A	A	B	B
Chr2_bin577	74110594	B	A	B	A	A	A	A	A	B	A	A	B	A	A	B	B	B	A	A	A	B	A	A	B	B	A	A	B	A	A	B	B	B	B	A	B	A	B	A	A	A	B	B	B	A	A	B	B
Chr2_bin578	74789529	B	A	B	A	A	A	A	A	B	A	A	B	A	A	B	B	B	A	A	A	B	A	A	B	B	A	A	B	A	A	B	B	B	B	A	B	A	B	A	A	A	B	B	B	A	A	B	B
Chr2_bin579	76122518	B	A	B	A	A	A	A	A	B	A	A	B	A	A	B	B	B	A	A	A	B	A	A	B	B	A	A	B	A	A	B	B	B	B	A	B	A	B	A	A	A	B	B	B	A	A	B	B
Chr2_bin580	76454056	B	A	B	A	A	A	A	A	B	A	A	B	A	A	B	B	B	A	A	A	B	A	A	B	B	A	A	B	A	A	B	B	B	B	A	B	A	B	A	A	A	B	B	B	A	A	B	B
Chr2_bin581	77901525	B	A	B	A	A	A	A	A	B	A	A	B	A	A	B	B	B	A	A	A	B	A	A	B	B	A	A	B	A	A	B	B	B	B	A	B	A	B	A	A	A	B	B	B	A	A	B	B
Chr2_bin582	78224537	B	A	B	A	A	A	A	A	B	A	A	B	A	A	B	B	B	A	A	A	B	A	A	B	B	A	A	B	A	A	B	B	B	B	A	B	A	B	A	A	A	B	B	B	A	A	B	B
Chr2_bin583	78378561	B	A	B	A	A	A	A	A	B	A	A	B	A	A	B	B	B	A	A	A	B	A	A	B	B	A	A	B	A	A	B	B	B	B	A	B	A	B	A	A	A	B	B	B	A	A	B	B
Chr2_bin584	79598129	B	A	B	A	A	A	A	A	B	A	A	B	A	A	B	B	B	A	A	A	B	A	A	B	B	A	A	B	A	A	B	B	B	B	A	B	A	B	A	A	A	B	B	B	A	A	B	B
Chr2_bin585	80616283	B	A	B	A	A	A	A	A	B	A	A	B	A	A	B	B	B	A	A	A	B	A	A	B	B	A	A	B	A	A	B	B	B	B	A	B	A	B	A	A	A	B	B	B	A	A	B	B
Chr2_bin586	81047101	B	A	B	A	A	A	A	A	B	A	A	B	A	A	B	B	B	A	A	A	B	A	A	B	B	A	A	B	A	A	B	B	B	B	A	B	A	B	A	A	A	B	B	B	A	A	B	B
Chr2_bin587	81089190	B	A	B	A	A	A	A	A	B	A	A	B	A	A	B	B	B	A	A	A	B	A	A	B	B	A	A	B	A	A	B	B	B	B	A	B	A	B	A	A	A	B	B	B	A	A	B	B
Chr2_bin588	81245271	B	A	B	A	A	A	A	A	B	A	A	B	A	A	B	B	B	A	A	A	B	A	A	B	B	A	A	B	A	A	B	B	B	B	A	B	A	B	A	A	A	B	B	B	A	A	B	B
Chr2_bin589	81300760	B	A	B	A	A	A	A	A	B	A	A	B	A	A	B	B	B	A	A	A	B	A	A	B	B	A	A	B	A	A	B	B	B	B	A	B	A	B	A	A	A	B	B	B	A	A	B	B
Chr2_bin590	81559040	B	A	B	A	A	A	A	A	B	A	A	B	A	A	B	B	B	B	A	A	B	A	A	B	B	A	A	B	A	A	B	B	B	B	A	B	A	B	A	A	A	B	B	B	A	A	B	B
Chr2_bin591	82573417	B	A	B	A	A	A	A	A	B	A	A	B	A	A	B	B	B	B	A	A	B	A	A	B	B	A	A	B	A	A	B	B	B	B	A	B	A	B	A	A	A	B	B	B	A	A	B	B
Chr2_bin592	82811496	B	A	B	A	A	A	A	A	B	A	A	B	A	A	B	B	B	B	A	A	B	A	A	B	B	A	A	B	A	A	B	B	B	B	A	B	A	B	A	A	A	B	B	B	A	A	B	B
Chr2_bin593	83050739	B	A	B	A	A	A	A	A	B	A	A	B	A	A	B	B	B	B	A	A	B	A	A	B	B	A	A	B	A	A	B	B	B	B	A	B	A	B	A	A	A	B	B	B	A	A	B	B
Chr2_bin594	83449901	B	A	B	A	A	A	A	A	B	A	A	B	A	A	B	B	B	B	A	A	B	A	A	B	B	A	A	B	A	A	B	B	B	B	A	B	A	B	A	A	A	B	B	B	A	A	B	B
Chr2_bin595	83945236	B	A	B	A	A	A	A	A	B	A	A	B	A	A	B	B	B	B	A	A	B	A	A	B	B	A	A	B	A	A	B	B	B	B	A	B	A	B	A	A	A	B	B	B	A	A	B	B
Chr2_bin596	84167876	B	A	B	A	A	A	A	A	B	A	A	B	A	A	B	B	B	B	A	A	B	A	A	B	B	A	A	B	A	A	B	B	B	B	A	B	A	B	A	A	A	B	B	B	A	A	B	B
Chr2_bin597	84326077	B	A	B	A	A	A	A	A	B	A	A	B	A	A	B	B	B	B	A	A	B	A	A	B	B	A	A	B	A	A	B	B	B	B	A	B	A	B	A	A	A	B	B	B	A	A	B	B
Chr2_bin598	84684266	B	A	B	A	A	A	A	A	B	A	A	B	A	A	B	B	B	B	A	A	B	A	A	B	B	A	A	B	A	A	B	B	B	B	A	B	A	B	A	A	A	B	B	B	A	A	B	B
Chr2_bin599	84764839	B	A	B	A	A	A	A	A	B	A	A	B	A	A	B	B	B	B	A	A	B	A	A	B	B	A	A	B	A	A	B	B	B	B	A	B	A	B	A	A	A	B	B	B	A	A	B	B
Chr2_bin600	84945388	B	A	B	A	A	A	A	A	B	A	A	B	A	A	B	B	B	B	A	A	B	A	A	B	B	A	A	B	A	A	B	B	B	B	A	B	A	B	A	A	A	B	B	B	A	A	B	B
Chr2_bin601	85161247	B	A	B	A	A	A	A	A	B	A	A	B	A	A	B	B	B	B	A	A	B	A	A	B	B	A	A	B	A	A	B	B	B	B	A	B	A	B	A	A	A	B	B	B	A	A	B	B
Chr2_bin602	86235168	B	A	B	A	A	A	A	A	B	A	A	B	A	A	B	B	B	B	A	A	B	A	A	B	B	A	A	B	A	A	B	B	B	B	A	B	A	B	A	A	A	B	B	B	A	A	B	B
Chr2_bin603	86476567	B	A	B	A	A	A	A	A	B	A	A	B	A	A	B	B	B	B	A	A	B	A	A	B	B	A	A	B	A	A	B	B	B	B	A	B	A	B	A	A	A	B	B	B	A	A	B	B
Chr2_bin604	86992995	B	A	B	A	A	A	A	A	B	A	A	B	A	A	B	B	B	B	A	A	B	A	A	B	A	A	A	B	A	A	B	B	B	B	A	B	A	B	A	A	A	B	B	B	A	A	B	B
Chr2_bin605	87537630	B	A	B	A	A	A	A	A	B	A	A	B	A	A	B	B	B	B	A	A	B	A	A	B	A	A	A	B	A	A	B	B	B	B	A	B	A	B	A	A	A	B	B	B	A	A	B	B
Chr2_bin606	87615705	B	A	B	A	A	A	A	A	B	A	A	B	A	A	B	B	B	B	A	A	B	A	B	B	A	A	A	B	A	A	B	B	B	B	A	B	A	B	A	A	A	B	B	B	A	A	B	B
Chr2_bin607	88043103	B	A	B	A	A	A	A	A	B	A	A	B	A	A	B	B	B	B	A	A	B	A	B	B	A	A	A	B	A	A	B	B	B	B	A	B	A	B	A	A	A	B	B	B	A	A	B	B
Chr2_bin608	88143366	B	A	B	A	A	A	A	A	B	A	A	B	A	A	B	B	B	B	A	A	B	A	B	B	A	A	A	B	A	A	B	B	B	B	A	B	A	B	A	A	A	B	B	B	A	A	B	B
Chr2_bin609	88224873	B	A	B	A	A	A	A	A	B	A	A	B	A	A	B	B	B	B	A	A	B	A	B	B	A	A	B	B	A	A	B	B	B	B	A	B	A	B	A	A	A	B	B	B	A	A	B	B
Chr2_bin610	88432711	B	A	B	A	A	A	A	A	B	A	A	B	A	A	B	B	B	B	A	A	B	A	B	B	A	A	B	B	A	A	B	B	B	B	A	B	A	B	A	A	A	B	B	B	A	A	B	B
Chr2_bin611	88497084	B	A	B	A	A	A	A	A	B	A	A	B	A	A	B	B	B	B	A	A	B	A	B	B	A	A	B	B	A	A	B	B	B	B	A	B	A	B	A	A	A	B	B	A	A	A	B	B
Chr2_bin612	88675456	B	A	B	A	A	A	A	A	B	A	A	B	A	A	B	B	B	B	A	A	B	A	B	B	A	A	B	B	A	A	B	B	B	B	A	B	A	B	A	A	A	B	B	A	A	A	B	B
Chr2_bin613	88908917	B	A	B	A	A	A	A	A	B	A	A	B	A	A	B	B	B	B	A	A	B	A	B	B	A	A	B	B	A	A	B	B	B	B	A	B	A	B	A	A	A	B	B	A	A	A	B	B
Chr2_bin614	89034387	B	A	B	A	A	A	A	A	B	A	A	B	A	A	B	B	B	B	A	A	B	A	B	B	A	A	B	B	A	A	B	B	B	B	A	B	A	B	A	A	A	B	B	A	A	A	B	B
Chr2_bin615	89215574	B	A	B	A	A	A	A	A	B	A	A	B	A	A	B	B	B	B	A	A	B	A	B	B	A	A	B	B	A	A	B	B	B	B	A	B	A	B	A	A	A	B	B	A	A	A	B	B
Chr2_bin616	89355221	B	A	B	A	A	A	A	A	B	A	A	B	A	A	B	B	B	B	A	A	B	A	B	B	A	A	B	B	A	A	B	B	B	B	A	B	A	B	A	A	A	B	B	A	A	A	B	B
Chr2_bin617	89550929	B	A	B	A	A	A	A	A	B	A	A	B	A	A	B	B	B	B	A	A	B	A	B	B	A	A	B	B	A	A	B	B	B	B	A	B	A	B	A	A	A	B	B	A	A	A	B	B
Chr2_bin618	89737148	B	A	B	A	A	A	A	A	B	A	A	B	A	A	B	B	B	B	A	A	B	A	B	B	A	A	B	B	A	A	B	B	B	B	A	B	A	B	A	A	A	B	B	A	A	A	B	B
Chr2_bin619	89813329	B	A	B	A	A	A	A	A	B	A	A	B	A	A	B	B	B	B	A	A	B	A	B	B	A	A	B	B	A	A	B	B	B	B	A	B	A	B	A	A	A	B	B	A	A	A	B	B
Chr2_bin620	89938848	B	A	B	A	A	A	A	A	B	A	A	B	A	A	B	B	B	B	A	A	B	A	B	B	A	A	B	B	A	A	B	B	B	B	A	B	A	B	A	A	A	B	B	A	A	A	B	B
Chr2_bin621	90038496	B	A	B	A	A	A	A	A	B	A	A	B	A	A	B	B	A	B	A	A	B	A	B	B	A	A	B	B	A	A	B	B	B	B	A	B	A	B	A	A	A	B	B	A	A	A	B	B
Chr2_bin622	90148566	B	A	B	A	A	A	A	A	B	A	A	B	A	A	B	B	A	B	A	A	B	A	B	B	A	A	B	B	A	A	B	B	B	B	A	B	A	B	A	A	A	B	B	A	A	A	B	B
Chr2_bin623	90846345	B	A	B	A	A	A	A	A	B	A	A	B	A	A	B	A	A	B	A	A	B	A	B	B	A	A	B	B	A	A	B	B	B	B	A	B	A	B	A	A	A	B	B	A	A	A	B	B
Chr2_bin624	90850055	B	A	B	A	A	A	A	A	B	A	A	B	A	A	B	A	A	B	A	A	B	A	B	B	A	A	B	B	A	A	B	B	B	B	A	B	A	B	A	A	A	B	B	A	A	A	B	B
Chr2_bin625	91022452	B	A	B	A	A	A	A	A	B	A	A	B	A	A	B	A	A	B	A	A	B	A	B	B	A	A	B	B	A	A	B	B	B	B	A	B	A	B	A	A	A	B	B	A	A	A	B	B
Chr2_bin626	91548063	B	A	B	A	A	A	A	A	B	A	A	B	A	A	B	A	A	B	A	A	B	A	B	B	A	A	B	B	A	A	B	B	B	B	A	B	A	B	A	A	A	B	B	A	A	A	B	B
Chr2_bin627	91647024	B	A	B	A	A	A	A	A	B	A	A	B	A	A	B	A	A	B	A	A	B	A	B	B	B	A	B	B	A	A	B	B	B	B	A	B	A	B	A	A	A	B	B	A	A	A	B	B
Chr2_bin628	91732660	B	A	B	A	A	A	A	A	B	A	A	B	A	A	B	A	A	B	A	A	B	A	B	B	B	A	B	B	A	A	B	B	B	B	A	B	A	B	A	A	A	B	B	B	A	A	B	B
Chr2_bin629	91861743	B	A	B	A	A	A	A	A	B	B	A	B	A	A	B	A	A	B	A	A	B	A	B	B	B	A	B	B	A	A	B	B	B	B	A	B	A	B	A	A	A	B	B	B	A	A	B	B
Chr2_bin630	91958342	B	A	B	A	A	A	A	A	B	B	A	B	A	A	B	A	A	B	A	A	B	A	B	B	B	A	B	B	A	A	B	B	B	B	A	B	A	B	A	A	A	B	B	B	A	A	B	B
Chr2_bin631	92239094	B	A	B	A	A	A	A	A	B	B	A	B	A	A	B	A	A	B	A	A	B	A	B	B	B	A	B	B	A	A	B	B	B	B	A	B	A	B	A	A	A	B	B	B	A	A	B	B
Chr2_bin632	92343969	B	A	B	A	A	A	A	A	B	B	A	B	A	A	B	A	A	B	A	A	B	A	B	B	B	A	B	B	A	A	B	B	B	B	A	B	A	B	A	A	A	B	B	B	A	A	B	B
Chr2_bin633	92507038	B	A	B	A	A	A	A	A	B	B	A	B	A	A	B	A	A	B	A	A	B	A	B	B	B	A	B	B	A	A	B	B	B	B	A	B	A	B	A	A	A	B	B	B	A	A	B	B
Chr2_bin634	92642871	B	A	B	A	A	A	A	A	B	B	A	B	A	A	B	A	A	B	A	A	B	A	B	B	B	A	B	B	A	A	B	B	B	B	A	B	A	B	A	A	A	B	B	B	A	A	B	B
Chr2_bin635	92728257	B	A	B	A	A	A	A	A	B	B	A	B	A	A	B	A	A	B	A	A	B	A	B	B	B	A	B	B	A	A	B	B	B	B	A	B	A	B	A	A	A	B	B	B	A	A	B	B
Chr2_bin636	92927598	B	A	B	A	A	A	A	A	B	B	A	B	A	A	B	A	A	B	A	A	B	A	B	B	B	A	B	B	A	A	B	B	B	B	A	B	A	B	A	A	B	B	B	B	A	A	B	B
Chr2_bin637	92979952	B	A	B	A	A	A	A	A	B	B	A	B	A	A	B	A	A	B	A	A	B	A	B	B	B	A	B	B	A	A	B	B	B	B	A	B	A	B	A	A	B	B	B	B	A	A	B	B
Chr2_bin638	93138018	B	A	B	A	A	A	A	A	B	B	A	B	A	A	B	A	A	B	A	A	B	A	B	B	B	A	B	B	A	A	B	B	B	B	A	B	A	B	A	A	B	B	B	B	A	A	B	B
Chr2_bin639	93156844	B	A	B	A	A	A	A	A	B	B	A	B	A	A	B	A	A	B	A	A	B	A	B	B	B	A	B	B	A	A	B	B	B	B	A	B	A	B	A	A	B	B	B	B	A	A	B	B
Chr2_bin640	93264069	B	A	B	A	A	A	A	A	B	B	A	B	A	A	B	A	A	B	A	A	B	A	B	B	B	A	B	B	A	A	B	B	B	B	A	B	A	B	A	A	B	B	B	B	A	A	B	B
Chr2_bin641	93476280	B	A	B	A	A	A	A	A	B	B	A	B	A	A	B	A	A	B	A	A	B	A	B	B	B	A	B	B	A	A	B	B	B	B	A	B	A	B	A	A	B	B	B	B	A	A	B	B
Chr2_bin642	93568982	B	A	B	A	A	A	A	A	B	B	A	B	A	A	B	A	A	B	A	A	B	A	B	B	B	A	B	B	A	A	B	B	B	B	A	B	A	B	A	A	B	B	B	B	A	A	B	B
Chr2_bin643	93799846	B	A	B	A	A	A	A	A	B	B	A	B	A	A	B	A	A	B	A	A	B	A	B	B	B	A	B	B	A	A	B	B	B	B	A	B	A	B	A	A	B	B	B	B	A	A	B	B
Chr2_bin644	93937056	B	A	B	A	A	A	A	A	B	B	A	B	A	A	B	A	A	B	A	A	B	A	B	B	B	A	B	B	A	A	B	B	B	B	A	B	A	B	A	A	B	B	B	B	A	A	B	A
Chr2_bin645	94023125	B	A	B	A	A	A	A	A	B	B	A	B	A	A	B	A	A	B	A	A	B	A	B	B	B	A	B	B	A	A	B	B	B	B	A	B	A	B	A	A	B	B	B	B	A	A	B	A
Chr2_bin646	94132465	B	A	B	A	A	A	A	A	B	B	A	B	A	A	B	A	A	B	A	A	B	A	B	B	B	A	B	B	A	A	B	B	B	B	A	B	A	B	A	A	B	B	B	B	A	A	B	A
Chr2_bin647	94245784	B	A	B	A	A	A	A	A	B	B	A	B	A	A	B	A	A	B	A	A	B	A	B	B	B	A	B	B	A	A	B	B	B	B	A	B	A	B	A	A	B	B	B	B	A	A	B	A
Chr2_bin648	94347835	B	A	B	A	A	A	A	A	B	B	A	B	A	A	B	A	A	B	A	A	B	A	B	B	B	A	B	B	A	A	B	B	A	B	A	B	A	B	A	A	B	B	B	B	A	A	B	A
Chr2_bin649	94429858	B	A	B	A	A	A	A	A	B	B	A	B	A	A	B	A	A	B	A	A	B	A	B	B	B	A	B	B	A	A	B	B	A	B	A	B	A	B	A	A	B	B	B	B	A	A	B	A
Chr2_bin650	94546440	B	A	B	A	A	A	A	A	B	B	A	B	A	A	B	A	A	B	A	A	B	A	B	B	B	A	B	B	A	A	B	B	A	B	A	B	A	B	A	A	B	B	B	B	A	A	B	A
Chr2_bin651	94603320	B	A	B	A	A	A	A	A	B	B	A	B	A	A	B	A	A	B	A	A	B	A	B	B	B	A	B	B	A	A	B	B	A	B	A	B	A	B	A	A	B	B	B	B	A	A	B	A
Chr2_bin652	94849351	B	A	B	A	A	A	A	A	B	B	A	B	A	A	B	A	A	B	A	A	B	A	B	B	B	A	B	B	A	A	B	B	A	B	A	B	A	B	A	A	B	B	B	B	A	A	B	A
Chr2_bin653	94929424	B	A	B	A	A	A	A	A	B	B	A	B	A	A	B	A	A	B	A	A	B	A	B	B	B	A	B	B	A	A	B	B	A	B	A	B	A	B	A	A	B	B	B	B	A	A	B	A
Chr2_bin654	95043896	B	A	B	A	A	A	A	A	B	B	A	B	A	A	B	A	A	B	A	A	B	A	B	B	B	A	B	B	A	A	B	B	A	B	A	B	A	B	A	A	B	B	B	B	A	A	B	A
Chr2_bin655	95142625	B	A	B	A	A	A	A	B	B	B	A	B	A	A	B	A	A	B	A	A	B	A	B	B	B	A	B	B	A	A	B	B	A	B	A	B	A	B	A	A	B	B	B	B	A	A	B	A
Chr2_bin656	95239801	B	A	B	A	A	A	A	B	B	B	A	B	A	A	B	A	A	B	A	A	B	A	B	B	B	A	B	B	A	A	B	B	A	B	A	B	A	B	A	A	B	B	B	B	A	A	B	A
Chr2_bin657	95849492	B	A	B	A	A	A	A	B	B	B	A	B	A	A	B	A	A	B	A	A	B	A	B	B	B	A	B	B	A	A	B	B	A	B	A	B	A	B	A	A	B	B	B	B	A	A	B	A
Chr2_bin658	95947471	B	A	B	A	A	A	A	B	B	B	A	B	A	A	B	A	A	B	A	A	B	A	B	B	B	A	B	B	A	A	B	B	A	B	A	B	A	B	A	A	B	B	B	B	A	A	B	A
Chr2_bin659	96046754	B	A	B	A	B	A	A	B	B	A	A	B	A	A	B	A	A	B	A	A	B	A	B	B	B	A	B	B	A	A	B	B	A	B	A	B	A	B	A	A	B	A	B	B	A	A	B	A
Chr2_bin660	96141719	B	A	B	A	B	A	A	B	B	A	A	B	A	A	B	A	A	B	A	A	B	A	B	B	B	A	B	B	A	B	B	B	A	B	A	B	A	B	B	A	B	A	B	B	A	A	A	A
Chr2_bin661	96193530	B	A	B	A	B	A	A	B	B	A	A	B	A	A	B	B	B	B	A	A	B	A	B	B	B	A	B	B	A	B	B	B	A	B	A	B	A	B	B	A	B	A	B	B	B	A	A	A
Chr2_bin662	96309681	B	A	B	A	B	A	A	B	B	A	A	B	A	A	B	B	B	B	A	A	B	A	B	B	B	A	B	B	A	B	B	B	A	B	A	B	A	B	B	A	B	A	B	B	B	A	A	A
Chr2_bin663	96416250	B	A	B	A	B	A	A	B	B	A	A	B	A	A	B	B	B	B	A	A	B	A	B	B	B	A	B	B	A	B	B	B	A	B	A	B	A	B	B	A	B	B	B	B	B	A	A	B
Chr2_bin664	96542160	B	A	B	A	B	A	A	B	B	A	A	B	A	A	B	B	B	B	A	A	B	A	B	B	B	A	B	B	A	B	B	B	A	B	A	B	A	B	B	A	B	B	B	B	B	A	A	B
Chr2_bin665	96621751	B	A	B	A	B	A	A	B	B	A	A	B	A	A	B	B	B	B	A	A	B	A	B	B	B	A	B	B	A	B	B	B	A	B	A	B	A	B	B	A	B	B	B	B	B	A	A	B
Chr2_bin666	96715638	B	A	B	A	B	A	A	B	B	A	A	B	A	A	B	A	A	B	A	A	B	A	B	B	B	A	B	B	A	B	B	B	A	B	A	B	A	B	B	A	B	B	B	B	B	A	A	B
Chr2_bin667	96798546	B	A	B	A	B	A	A	B	B	A	A	B	A	A	B	A	A	B	A	A	B	A	B	B	B	A	B	B	A	B	B	B	A	B	A	B	A	B	B	A	B	B	B	B	B	A	A	B
Chr2_bin668	96868446	B	A	B	A	B	A	A	B	B	A	A	B	A	A	B	A	A	B	A	A	B	A	B	B	B	A	B	B	A	B	B	B	A	B	A	B	A	B	B	A	B	B	B	B	B	A	A	B
Chr2_bin669	96995838	B	A	B	A	B	B	A	B	B	A	A	B	A	A	B	A	A	B	A	A	B	A	B	B	B	A	B	B	A	B	B	B	A	B	A	B	A	B	B	A	B	B	B	B	B	A	A	B
Chr2_bin670	97077937	B	A	B	A	B	B	A	B	B	A	A	B	A	A	B	A	A	B	A	A	B	A	B	B	B	A	B	B	A	B	B	B	A	B	A	B	A	B	B	A	B	B	A	B	B	A	A	B
Chr2_bin671	97248432	B	A	B	A	B	B	A	B	B	A	A	B	A	A	B	A	A	B	A	A	B	A	B	B	B	A	B	B	A	B	B	B	A	B	A	B	A	B	B	A	B	B	A	B	B	A	A	B
Chr2_bin672	97346194	B	A	B	A	B	B	A	B	B	A	A	B	A	A	B	A	A	B	A	A	B	A	B	B	B	A	B	B	A	B	B	B	A	B	A	B	A	B	B	A	B	B	A	B	B	A	A	B
Chr2_bin673	97409227	B	A	B	A	B	B	A	B	B	A	A	B	A	A	B	A	A	B	A	A	B	A	B	B	B	A	B	B	A	B	B	B	A	B	A	B	A	B	A	A	B	B	A	B	B	A	A	B
Chr2_bin674	97522432	B	A	B	A	B	B	A	B	B	A	A	B	A	A	B	A	A	B	A	A	B	A	B	B	B	A	B	B	A	B	B	B	A	B	A	B	A	B	A	A	B	B	A	B	B	A	A	B
Chr2_bin675	97588026	B	A	B	A	B	B	A	B	B	A	A	B	A	A	B	A	A	B	A	A	B	A	B	B	B	A	B	B	A	B	B	B	A	B	A	B	A	B	A	A	B	B	A	B	B	A	A	B
Chr2_bin676	97724924	B	A	B	A	B	B	A	B	B	A	A	B	A	A	B	A	A	B	A	A	B	A	B	B	B	A	B	B	A	B	B	B	A	B	A	B	A	B	A	A	B	B	A	B	B	A	A	B
Chr2_bin677	97849056	B	A	B	A	B	B	A	B	B	A	A	B	A	A	B	A	A	B	A	A	B	A	B	B	B	A	B	B	A	B	B	B	A	B	A	B	A	B	A	A	B	B	A	B	B	A	A	B
Chr2_bin678	97945693	B	A	B	A	B	B	A	B	B	A	A	B	A	A	B	A	A	B	A	A	B	A	A	B	B	A	B	B	A	B	B	B	A	B	A	B	A	B	A	A	B	B	A	B	B	A	A	B
Chr2_bin679	98046528	B	A	B	A	B	B	A	B	B	A	A	B	A	A	B	A	A	B	A	A	B	A	A	B	B	A	B	B	A	B	B	B	A	B	B	B	A	B	A	A	B	B	A	B	B	A	A	B
Chr2_bin680	98121623	B	A	B	A	B	B	A	B	B	A	A	B	A	A	B	A	A	B	A	A	B	A	A	B	B	A	B	B	A	B	B	B	A	B	B	B	A	B	A	A	B	B	A	B	B	A	A	B
Chr2_bin681	98156733	B	A	B	A	B	B	A	B	B	A	A	B	A	A	B	A	A	B	A	A	B	A	A	B	B	A	B	B	A	B	B	B	A	B	B	B	A	B	A	A	B	B	A	B	A	A	A	B
Chr2_bin682	98345400	B	A	B	A	B	B	A	B	B	A	A	B	A	A	B	A	A	B	A	A	B	A	A	B	B	A	B	B	A	B	B	B	A	B	B	B	A	B	A	A	B	B	A	B	A	A	A	B
Chr2_bin683	98446618	B	A	B	A	B	B	A	B	B	A	A	B	A	A	B	A	A	B	A	A	B	A	A	A	B	A	B	B	A	B	B	B	A	B	B	B	A	B	A	B	B	B	A	B	A	A	A	B
Chr2_bin684	98622073	B	A	B	A	B	B	A	B	B	A	A	B	A	A	B	A	A	B	A	A	B	A	A	A	B	A	B	B	A	B	B	B	A	B	B	B	A	B	A	B	B	B	A	B	A	A	A	B
Chr2_bin685	98669697	B	A	B	A	B	B	A	B	B	A	A	B	A	A	B	A	A	B	A	A	B	A	A	A	B	A	B	B	A	B	B	B	A	B	B	B	A	B	A	B	B	B	A	B	A	A	A	B
Chr2_bin686	98794553	B	A	B	A	B	B	A	B	B	A	A	B	A	A	B	A	A	B	A	A	B	A	A	A	B	A	B	B	A	B	B	B	A	B	B	B	A	B	A	B	B	B	A	B	A	A	A	B
Chr2_bin687	98925683	B	A	B	A	B	B	A	B	B	A	A	B	A	A	B	A	A	B	A	B	B	A	A	A	B	A	B	B	A	B	B	B	A	B	B	B	A	B	A	B	B	B	A	B	A	A	A	B
Chr2_bin688	99047086	B	A	B	A	B	B	A	B	B	A	A	B	A	A	B	A	A	B	A	B	B	A	A	A	B	A	B	B	A	B	B	B	A	B	B	B	A	B	A	B	B	A	A	B	A	A	A	B
Chr2_bin689	99145404	B	A	B	A	B	B	A	B	B	A	A	B	A	A	B	A	A	B	A	B	B	A	A	A	B	A	B	B	A	B	B	B	A	B	B	B	A	B	A	B	B	A	A	B	A	A	A	B
Chr2_bin690	99347368	B	A	B	A	B	B	A	B	B	A	A	B	A	A	B	A	A	B	A	B	B	A	A	A	B	A	B	B	A	B	B	B	A	B	B	B	A	B	A	B	B	A	A	B	A	A	A	B
Chr2_bin691	99446351	B	A	B	A	B	B	A	B	B	A	A	B	A	A	A	A	A	B	A	B	B	A	A	B	B	A	B	B	A	B	B	B	A	B	B	B	A	B	A	B	B	A	A	B	A	A	A	B
Chr2_bin692	99524286	B	A	A	A	B	B	A	B	B	A	A	B	A	A	A	A	A	B	A	B	B	A	A	B	B	A	B	B	A	B	B	B	A	B	B	B	A	B	A	B	B	A	A	B	A	A	A	B
Chr2_bin693	99643352	B	A	A	A	B	B	A	B	B	A	A	B	A	A	A	A	A	B	A	B	B	A	A	B	B	A	B	B	A	B	B	B	A	B	B	B	A	B	A	B	B	A	A	B	A	A	A	B
Chr2_bin694	99768745	B	A	A	A	B	B	A	B	B	A	A	B	A	A	A	A	A	B	A	B	B	A	A	B	B	A	B	B	A	B	B	B	A	B	B	B	A	B	A	B	B	A	A	B	A	A	B	B
Chr2_bin695	99921210	B	A	A	A	B	B	A	B	B	A	A	B	A	A	A	A	A	B	A	B	B	A	A	B	B	A	B	B	A	B	B	B	A	B	B	B	A	B	A	B	B	A	A	B	A	A	B	B
Chr2_bin696	100038210	B	A	A	A	B	B	A	B	B	A	A	B	A	A	A	A	A	B	A	B	B	A	A	B	B	A	B	B	A	B	B	B	A	B	B	B	A	B	A	B	B	A	A	B	A	A	B	B
Chr2_bin697	100120022	B	A	A	A	B	B	A	B	B	A	A	B	A	A	A	A	A	B	A	B	B	A	A	B	B	A	B	B	A	B	B	B	A	B	B	B	A	B	A	B	B	A	A	B	A	A	B	B
Chr2_bin698	100232706	B	B	A	A	B	B	A	B	B	A	A	B	A	A	A	A	A	B	A	B	B	A	A	B	B	A	B	B	A	B	B	B	A	B	B	B	A	B	A	B	B	A	A	B	A	A	B	A
Chr2_bin699	100314089	B	B	A	A	B	B	A	B	B	A	A	B	A	A	A	A	A	B	A	B	B	A	A	B	B	A	B	B	A	B	B	B	A	B	B	A	A	B	A	B	B	A	A	B	A	A	B	A
Chr2_bin700	100419795	B	B	A	A	B	B	A	B	B	A	A	B	A	A	A	A	A	B	A	B	B	A	A	B	B	A	B	B	A	B	B	B	A	B	B	A	A	B	A	B	B	A	A	B	A	A	B	A
Chr2_bin701	100524400	B	B	A	A	B	B	A	B	B	A	A	B	A	B	A	A	A	B	A	B	B	A	A	B	B	A	B	B	A	B	B	B	A	B	B	A	A	B	A	B	B	A	A	B	A	A	B	A
Chr2_bin702	100625455	B	B	A	A	B	B	A	B	B	A	B	B	A	B	A	A	A	B	A	B	B	A	A	B	B	A	B	B	A	B	B	B	A	B	B	A	A	B	A	B	B	A	A	B	A	A	B	A
Chr2_bin703	102981163	B	B	A	B	B	B	A	B	B	A	B	B	A	B	A	A	A	B	A	B	B	A	A	B	B	B	B	B	A	B	B	B	A	B	B	A	A	B	B	B	B	A	A	B	A	A	B	A
Chr3_bin704	246712	B	B	B	B	A	B	A	B	B	B	A	B	B	A	B	A	A	A	B	A	B	B	B	B	A	A	A	A	B	A	A	A	A	A	B	B	A	B	A	A	A	A	B	B	B	A	A	B
Chr3_bin705	326484	B	B	B	B	A	B	A	B	B	B	A	B	B	A	B	A	A	A	B	A	B	B	B	B	A	A	A	A	B	A	A	A	A	A	B	B	A	B	A	A	A	A	B	B	B	A	A	B
Chr3_bin706	393274	B	B	B	B	A	B	A	B	B	B	A	B	B	A	B	A	A	A	B	A	B	B	B	B	A	A	A	A	B	A	A	A	A	A	B	B	A	B	A	A	A	A	B	B	B	A	A	B
Chr3_bin707	514389	B	B	B	B	A	B	A	B	B	B	A	B	B	A	B	A	A	A	B	A	B	B	B	B	A	A	A	A	B	A	A	A	A	A	B	B	A	B	A	A	A	A	B	B	B	A	A	B
Chr3_bin708	633393	B	B	B	B	A	B	A	B	B	B	A	B	B	A	B	A	A	A	B	A	B	A	B	B	A	A	A	A	B	A	A	A	A	A	B	B	A	B	A	A	A	A	B	B	B	B	A	B
Chr3_bin709	702897	B	B	B	B	A	B	A	B	B	B	A	B	B	A	B	A	A	A	B	A	B	A	B	B	A	A	A	A	B	A	A	A	A	A	B	B	A	B	A	A	A	A	B	B	B	B	A	B
Chr3_bin710	840525	B	B	B	B	A	B	A	B	B	B	A	B	B	A	B	A	A	A	B	A	B	A	B	B	A	A	A	A	B	A	A	A	A	A	B	B	A	B	A	A	A	A	B	B	B	B	A	B
Chr3_bin711	936914	B	B	B	B	A	B	A	B	B	B	A	B	B	A	B	A	A	A	B	A	B	A	B	B	A	A	A	A	B	A	A	A	A	A	B	B	A	B	A	A	A	A	B	B	B	B	A	B
Chr3_bin712	1020977	B	B	B	B	A	B	A	B	B	B	A	B	B	A	B	A	A	A	B	A	B	A	B	B	A	A	A	A	B	A	A	A	A	A	B	B	A	B	A	A	A	A	B	B	B	B	A	B
Chr3_bin713	1144717	B	B	B	B	A	B	A	B	B	B	A	B	B	A	B	A	A	A	B	A	B	A	B	A	A	A	A	A	B	A	A	A	A	A	B	B	A	B	A	A	A	A	B	B	B	B	A	B
Chr3_bin714	1215080	B	B	B	B	A	B	A	B	B	B	A	B	B	A	B	A	A	A	B	A	B	A	B	A	A	A	A	A	B	A	A	A	A	A	B	B	A	B	A	A	A	A	B	B	B	B	A	B
Chr3_bin715	1344957	B	B	B	B	A	B	A	B	B	B	A	B	B	A	B	A	A	A	B	A	B	A	B	A	A	A	A	A	B	A	A	A	A	B	B	B	A	B	A	A	A	A	B	B	B	B	A	B
Chr3_bin716	1416444	B	B	B	B	A	B	A	B	B	B	A	B	B	A	B	A	A	A	B	A	B	A	B	A	A	A	A	A	B	A	A	A	A	B	B	B	A	B	A	A	A	A	B	B	B	B	A	B
Chr3_bin717	1542512	B	B	B	B	A	B	A	B	B	B	A	B	B	A	B	A	A	A	B	A	B	A	B	A	A	A	A	A	B	A	A	A	A	B	B	B	A	B	A	A	A	A	B	B	B	B	A	B
Chr3_bin718	1600538	B	B	B	B	A	B	A	B	B	B	A	B	B	A	B	A	A	A	B	A	B	A	B	A	A	A	A	A	B	A	A	A	A	B	B	B	A	B	A	A	A	A	B	B	B	B	A	B
Chr3_bin719	1734552	B	B	B	B	A	B	A	B	B	B	A	B	B	A	B	A	A	A	B	A	B	A	B	A	A	A	A	A	B	A	A	A	A	B	B	B	A	B	A	A	A	A	B	B	B	B	A	B
Chr3_bin720	1849480	B	B	B	B	A	B	A	B	B	B	A	B	B	A	B	A	A	A	B	A	B	A	B	A	A	A	A	A	B	A	A	A	A	B	B	B	A	B	A	A	A	A	B	B	B	A	A	B
Chr3_bin721	1907823	B	B	B	B	A	B	A	B	B	B	A	B	B	A	B	A	A	A	B	A	B	A	B	A	A	A	A	A	B	A	A	A	A	B	B	B	A	B	A	A	A	A	B	B	B	A	A	B
Chr3_bin722	2042440	B	B	B	B	A	B	A	B	B	B	A	B	B	A	B	A	A	A	B	A	B	A	B	A	A	A	A	A	B	A	A	A	A	B	B	B	A	B	A	A	A	A	B	B	B	A	A	B
Chr3_bin723	2090257	B	B	B	A	A	B	A	B	B	B	A	B	B	A	B	A	A	A	B	A	B	A	B	A	A	A	A	A	B	A	A	A	A	B	B	B	A	B	A	A	A	A	B	B	B	A	A	B
Chr3_bin724	2154819	B	B	B	A	A	B	A	B	B	B	A	B	B	A	B	A	A	A	B	A	B	A	B	A	A	A	A	A	B	A	A	A	A	B	B	B	A	B	A	A	A	A	B	B	B	A	A	B
Chr3_bin725	2445739	B	B	B	A	A	B	A	B	B	B	A	B	B	A	B	A	A	A	B	A	B	A	B	A	A	A	A	A	B	A	A	A	A	B	B	B	A	B	A	A	A	A	B	B	B	A	A	B
Chr3_bin726	2547717	B	B	B	A	A	B	A	B	B	B	A	B	B	A	B	A	A	A	B	A	B	A	B	A	A	A	A	A	B	A	A	A	A	B	B	B	A	B	A	A	A	A	B	B	B	A	A	B
Chr3_bin727	2647940	B	B	B	A	A	B	A	B	B	B	A	B	B	A	A	A	A	A	B	A	B	A	B	A	A	A	A	A	B	A	A	A	A	B	B	B	A	B	A	A	A	A	B	B	B	A	A	B
Chr3_bin728	2710096	B	B	B	A	A	B	A	B	B	B	A	B	B	A	A	A	A	A	B	A	A	A	B	B	A	A	A	A	B	A	A	A	A	B	B	B	A	B	A	A	A	A	B	B	B	A	A	B
Chr3_bin729	2938305	B	B	B	A	A	B	A	B	B	B	A	B	B	A	A	A	A	A	B	A	A	A	B	B	A	A	A	A	B	A	A	A	A	B	B	B	A	B	A	A	A	A	B	B	B	A	A	B
Chr3_bin730	3048443	B	B	B	A	A	B	A	B	B	B	A	B	B	A	A	A	A	A	B	A	A	A	B	B	A	A	A	B	B	A	A	A	A	B	B	B	A	B	A	A	A	A	B	B	B	A	A	B
Chr3_bin731	3132753	B	B	B	A	A	B	A	B	B	B	A	B	B	A	A	A	A	A	B	A	A	A	B	B	A	A	A	B	B	A	A	A	A	B	B	B	A	B	A	A	A	A	B	B	B	A	A	B
Chr3_bin732	3215792	B	B	B	A	A	B	A	B	B	B	A	B	B	A	A	A	A	A	B	A	A	A	B	B	A	A	A	B	B	A	A	A	A	B	B	B	A	B	A	A	A	A	B	B	B	A	A	B
Chr3_bin733	3431731	B	B	B	A	A	B	A	A	B	B	A	B	B	A	A	A	A	A	B	A	A	A	B	B	A	A	A	B	B	A	A	A	A	B	B	B	A	B	A	A	A	A	B	B	B	A	A	B
Chr3_bin734	3508655	B	B	B	A	A	B	A	A	B	B	A	B	B	A	A	A	A	A	B	A	A	A	B	B	A	A	A	B	B	A	A	A	A	B	B	B	A	B	A	A	A	A	B	B	B	A	A	B
Chr3_bin735	3649739	B	B	B	A	A	B	A	A	B	B	A	B	B	A	A	A	A	A	B	A	A	A	B	B	A	A	B	B	B	A	A	A	A	B	B	B	A	B	A	A	A	A	B	B	B	A	A	B
Chr3_bin736	3715771	B	B	B	A	A	B	A	A	B	B	A	B	B	A	A	A	A	A	B	A	A	A	B	B	A	A	B	B	B	A	A	A	A	B	B	B	A	B	A	A	A	A	B	B	B	A	A	B
Chr3_bin737	3772671	B	B	B	A	A	B	A	A	B	B	A	B	B	A	A	A	A	A	B	A	A	A	B	B	A	A	B	B	B	B	A	A	A	B	B	B	A	B	A	A	A	A	B	B	B	A	A	B
Chr3_bin738	3894264	B	B	B	A	A	B	A	A	B	B	A	B	B	A	A	A	A	A	B	A	A	A	B	B	A	A	B	B	B	B	A	A	A	B	B	B	A	B	A	A	A	A	B	B	B	A	A	B
Chr3_bin739	3974236	B	B	B	A	A	B	A	A	B	B	A	B	B	A	A	A	A	A	B	A	A	A	B	B	A	A	B	B	B	B	A	A	A	B	B	B	A	B	A	A	A	A	B	B	B	A	A	B
Chr3_bin740	4132430	B	B	B	A	A	B	A	A	B	B	A	B	B	A	A	A	A	A	B	A	A	A	B	B	A	A	B	B	B	B	A	A	A	B	B	B	A	B	A	A	A	A	B	B	B	A	A	B
Chr3_bin741	4246055	B	B	B	A	A	B	A	A	B	B	A	B	B	A	A	A	A	A	B	A	A	A	B	B	A	A	B	B	B	B	A	A	A	B	B	B	A	B	A	A	A	A	B	B	B	A	A	B
Chr3_bin742	4349739	B	B	B	A	A	B	A	A	B	B	A	B	B	A	A	A	A	A	A	A	A	A	B	B	A	A	B	B	B	B	A	A	A	B	B	B	A	B	A	A	A	A	B	B	B	A	A	B
Chr3_bin743	4416818	B	B	B	A	A	B	A	A	B	B	A	B	B	A	A	A	A	A	A	A	A	A	A	A	A	A	B	B	B	B	A	A	A	B	B	B	A	B	A	A	A	A	B	B	B	A	A	B
Chr3_bin744	4523014	B	B	B	A	A	B	A	A	B	B	A	B	B	A	A	A	A	A	A	A	A	A	A	A	A	A	B	B	B	B	B	A	A	B	B	B	A	B	A	A	A	A	B	B	B	A	A	B
Chr3_bin745	4625762	B	B	B	A	A	B	A	A	B	B	A	B	B	A	A	A	A	A	A	A	A	A	A	A	A	A	B	B	B	B	B	A	A	B	B	B	A	B	A	A	A	A	B	B	B	A	A	B
Chr3_bin746	4827405	B	B	B	A	A	B	A	A	B	B	A	B	B	A	A	A	A	A	A	A	A	A	A	A	A	A	B	B	B	B	B	A	A	B	B	B	A	B	A	A	A	A	B	B	B	A	A	B
Chr3_bin747	4911110	B	B	B	A	A	B	A	A	B	B	A	B	B	A	A	A	A	A	A	A	A	A	A	A	A	A	B	B	B	B	B	A	A	B	B	B	A	B	A	A	A	A	B	B	B	A	A	B
Chr3_bin748	5049355	B	B	B	A	A	B	A	A	B	B	A	B	B	A	A	A	A	A	A	A	A	A	A	A	A	A	B	B	B	B	B	A	A	B	B	B	A	B	A	A	A	A	B	B	B	A	A	B
Chr3_bin749	5063921	B	B	B	A	A	B	A	A	B	B	A	B	B	A	A	A	A	A	A	A	A	A	A	A	A	A	B	B	B	B	B	A	A	B	B	B	A	B	A	A	A	A	B	B	B	A	A	B
Chr3_bin750	5291832	B	B	B	A	A	B	A	A	B	B	A	B	B	A	A	A	A	A	A	A	A	A	A	A	A	A	B	B	B	B	B	A	A	B	B	B	A	B	A	A	A	A	B	B	B	A	A	B
Chr3_bin751	5425625	B	B	B	A	A	B	A	A	B	B	A	B	B	A	A	A	A	A	A	A	A	A	A	A	A	A	B	B	B	B	B	A	A	B	B	B	A	B	A	A	A	A	B	B	B	A	A	B
Chr3_bin752	5476000	B	B	B	A	A	B	A	A	B	B	A	B	B	A	A	A	A	A	A	A	A	A	A	A	A	A	B	B	B	B	B	A	B	B	B	B	A	B	A	A	A	A	B	B	B	A	A	B
Chr3_bin753	5569371	B	B	B	A	A	B	A	A	B	B	A	B	B	A	A	A	A	A	A	A	A	A	A	A	A	A	B	B	B	B	B	A	B	B	B	B	A	B	A	A	A	A	B	B	B	A	A	B
Chr3_bin754	5690935	B	B	B	A	A	B	A	A	B	B	A	B	B	A	A	A	A	A	A	A	A	A	A	A	A	A	B	B	B	B	B	A	B	B	B	B	A	B	A	A	A	A	B	B	B	A	A	B
Chr3_bin755	5838815	B	B	B	A	A	B	A	A	B	B	A	B	B	A	A	A	A	A	A	A	A	A	A	A	A	A	B	B	B	B	B	A	B	B	B	B	A	B	A	A	A	A	B	B	B	A	A	B
Chr3_bin756	5945522	B	B	B	A	A	B	A	A	B	B	A	B	B	A	A	A	A	A	A	A	A	A	A	A	A	A	B	B	B	B	B	A	B	B	B	B	A	B	A	A	A	A	B	B	B	A	A	B
Chr3_bin757	6018198	B	B	B	A	A	B	A	A	B	B	A	B	B	A	A	A	A	A	A	A	A	A	A	A	A	A	B	B	B	B	B	A	B	B	B	B	A	B	A	A	A	A	B	B	B	A	A	B
Chr3_bin758	6120419	B	B	B	A	A	B	A	A	B	B	A	B	B	A	A	A	A	B	A	A	A	A	A	A	A	A	B	B	B	B	B	A	B	B	B	B	A	B	A	A	A	A	B	A	B	A	A	B
Chr3_bin759	6244499	B	B	B	A	A	B	A	A	B	B	A	B	B	A	A	A	A	B	A	A	A	A	A	A	A	A	B	B	B	B	B	A	B	B	B	B	A	B	A	A	A	A	B	A	B	A	A	B
Chr3_bin760	6326186	B	B	B	A	A	B	A	A	B	B	B	B	B	A	A	A	A	B	A	A	A	A	A	A	A	A	B	B	B	B	B	A	B	B	B	B	A	B	A	A	A	A	B	A	B	A	A	B
Chr3_bin761	6353280	B	A	B	A	A	B	A	A	B	B	B	B	B	A	A	A	A	B	A	A	A	A	A	A	A	A	B	B	B	B	B	A	B	B	B	A	A	B	A	A	A	A	B	A	B	A	A	B
Chr3_bin762	6497571	B	A	B	A	A	B	A	A	B	B	B	A	B	A	A	A	A	B	A	A	A	A	A	A	A	A	B	B	B	B	B	A	B	B	B	A	A	B	A	A	A	A	B	A	B	A	A	B
Chr3_bin763	6749936	B	A	B	A	A	B	A	A	B	B	B	A	B	A	A	A	A	B	A	A	A	A	A	A	A	A	B	B	B	B	B	A	B	B	B	A	A	B	A	A	A	A	B	A	B	A	A	B
Chr3_bin764	6849989	B	A	B	A	A	B	A	A	B	B	B	A	B	A	A	A	A	B	A	A	A	A	A	A	A	A	B	B	B	B	B	A	B	B	B	A	A	B	A	A	A	A	B	A	B	A	A	B
Chr3_bin765	6935145	B	A	B	A	A	B	A	A	B	B	B	A	B	A	A	A	A	B	A	A	A	A	A	A	A	A	B	B	B	B	B	A	B	B	B	A	A	B	A	A	A	A	B	A	A	A	A	B
Chr3_bin766	6980189	B	A	B	A	A	B	A	A	B	B	B	A	B	A	A	A	A	B	A	A	B	A	A	A	A	A	B	B	B	B	B	A	B	B	B	A	A	B	A	A	A	A	B	A	A	A	A	B
Chr3_bin767	7137398	B	A	B	A	A	B	A	A	B	B	B	A	B	A	A	A	A	B	A	A	B	A	A	A	A	A	B	B	B	B	B	A	B	B	B	A	A	B	A	A	A	A	B	A	A	A	A	B
Chr3_bin768	7249960	B	A	B	A	A	B	A	A	B	B	B	A	B	A	A	A	A	B	A	A	B	A	A	A	A	A	B	B	B	B	B	A	B	B	B	A	A	B	A	A	A	A	B	A	A	A	A	B
Chr3_bin769	7336270	B	A	B	A	A	B	A	A	B	B	B	A	B	A	A	A	A	B	A	A	B	A	A	A	A	A	B	B	B	B	B	A	B	B	B	A	A	B	A	A	A	A	B	A	A	A	A	B
Chr3_bin770	7417824	B	A	B	A	A	B	A	A	B	B	B	A	B	A	A	A	A	B	A	A	B	A	A	A	A	A	B	B	B	B	B	A	B	B	B	A	A	B	A	A	A	A	B	A	A	A	A	B
Chr3_bin771	7523048	B	A	B	A	A	B	A	A	B	B	B	A	B	A	A	A	A	B	A	A	B	A	A	A	A	A	B	B	B	B	B	A	B	B	B	A	A	B	A	A	A	A	B	A	A	A	A	B
Chr3_bin772	7602769	B	A	B	A	A	B	A	A	B	B	B	A	B	A	A	A	A	B	A	A	B	A	A	A	A	A	B	B	B	B	B	A	B	B	B	A	A	B	A	A	A	A	B	A	A	A	A	B
Chr3_bin773	7676721	B	A	B	A	A	B	A	A	B	B	B	A	B	A	A	A	A	B	A	A	B	A	A	A	A	A	B	B	B	B	B	A	B	B	B	A	A	B	A	A	A	A	B	A	A	A	A	B
Chr3_bin774	7773892	B	A	B	A	A	B	A	A	B	B	B	A	B	A	A	A	A	B	A	A	B	A	A	A	A	A	B	B	B	B	B	A	B	B	B	A	A	B	A	A	A	A	B	A	A	A	A	B
Chr3_bin775	8048495	B	A	B	A	A	B	A	A	B	B	B	A	B	A	A	A	A	B	A	A	B	A	A	A	A	A	B	B	B	B	B	A	B	B	B	A	A	B	A	A	A	A	B	A	A	A	A	B
Chr3_bin776	8112248	B	A	B	A	A	B	A	A	B	B	B	A	B	A	A	A	A	B	A	A	B	A	A	B	A	A	B	B	B	B	B	A	B	B	B	A	A	B	A	A	A	A	B	B	A	A	A	B
Chr3_bin777	8345730	B	A	B	A	A	B	A	A	B	B	B	A	B	A	A	A	A	B	A	A	B	A	A	B	A	A	B	B	B	B	B	A	B	B	B	A	A	B	A	A	A	A	B	B	A	A	A	B
Chr3_bin778	8367972	B	A	B	A	A	B	A	A	B	B	B	A	B	A	A	A	A	B	A	A	B	A	A	B	A	A	B	B	B	B	B	A	B	B	B	A	A	B	A	A	A	A	B	B	A	B	A	B
Chr3_bin779	8615719	B	A	B	A	A	B	A	A	B	B	B	A	B	A	A	A	A	B	A	A	B	A	A	B	A	A	B	B	B	B	B	A	B	B	B	A	A	B	A	A	A	A	B	B	A	B	A	B
Chr3_bin780	8801347	B	A	B	A	A	B	A	A	B	B	B	A	B	A	A	A	A	B	A	A	B	A	A	B	A	A	B	B	B	B	B	A	B	B	B	A	A	B	A	A	A	A	B	B	A	B	A	B
Chr3_bin781	8947100	B	A	B	A	A	B	A	A	B	B	B	A	B	A	A	A	A	B	A	A	B	A	A	B	A	A	B	B	B	B	B	A	B	B	B	A	A	B	A	A	A	A	B	B	A	B	A	B
Chr3_bin782	8970369	B	A	B	A	A	B	A	A	B	B	B	A	B	A	A	B	B	B	A	A	B	A	A	B	A	A	B	B	B	B	B	A	B	B	B	A	A	B	A	A	A	A	B	B	A	B	A	B
Chr3_bin783	9118204	B	A	B	A	A	B	A	A	B	B	B	A	B	A	A	B	B	B	A	A	B	A	A	B	A	A	B	B	B	B	B	A	B	B	B	A	A	B	A	A	A	A	B	B	A	B	A	B
Chr3_bin784	9436771	B	A	B	A	A	B	A	A	B	B	B	A	B	A	A	B	B	B	A	A	B	A	A	B	A	A	B	B	B	B	B	A	B	B	B	A	A	B	A	A	A	A	B	B	A	B	A	B
Chr3_bin785	9548944	B	A	B	A	A	B	A	A	B	B	B	A	B	A	A	B	B	B	A	A	B	A	A	B	A	A	B	B	B	B	B	A	B	B	B	A	A	B	A	A	A	A	B	B	A	B	A	B
Chr3_bin786	9620336	B	A	B	A	A	B	A	A	B	B	B	B	B	A	A	B	B	B	A	A	B	A	A	B	A	A	B	B	B	B	B	A	B	B	B	A	A	B	A	A	A	A	B	B	A	B	A	B
Chr3_bin787	9712237	B	A	B	A	A	B	A	A	B	B	B	B	B	A	A	B	B	B	A	A	B	A	A	B	A	A	B	B	B	B	B	A	B	B	B	A	A	B	A	A	A	A	B	B	A	B	A	B
Chr3_bin788	9807729	B	A	B	A	A	B	A	A	B	B	B	B	B	A	A	B	B	B	A	A	B	A	A	B	A	A	B	B	B	B	B	A	B	B	B	A	A	B	A	A	A	A	B	B	A	B	A	B
Chr3_bin789	10048725	B	A	B	A	A	B	A	A	B	B	B	B	B	A	A	B	B	B	A	A	B	A	A	B	A	A	B	B	B	B	B	A	B	B	B	A	A	B	A	A	A	A	B	B	A	B	A	B
Chr3_bin790	10136512	B	A	B	A	A	B	A	A	B	B	B	B	B	A	A	B	B	B	A	A	B	A	A	B	A	A	B	B	B	B	B	A	B	B	B	A	A	B	A	A	A	A	B	B	A	B	A	B
Chr3_bin791	10152678	B	A	B	A	A	B	A	A	B	B	B	B	B	A	A	B	B	B	A	A	B	A	A	B	A	A	B	B	B	B	B	A	B	B	B	A	A	B	A	A	A	A	B	B	A	B	A	B
Chr3_bin792	10397826	B	A	B	A	A	B	A	A	B	B	B	B	B	A	A	B	B	B	A	A	B	A	A	B	A	A	B	B	B	B	B	A	B	B	B	A	A	B	A	A	A	A	B	B	A	B	A	B
Chr3_bin793	10536935	B	A	B	A	A	B	A	A	B	B	B	B	B	A	A	B	B	B	A	A	B	A	A	B	A	A	B	B	B	B	B	A	B	B	B	A	A	B	A	A	A	A	B	B	A	B	A	B
Chr3_bin794	10566694	B	A	B	A	A	B	A	A	B	B	B	B	A	A	A	B	B	B	A	A	B	A	A	B	A	A	B	B	B	B	B	A	B	B	B	A	A	B	A	A	A	A	B	B	A	B	A	B
Chr3_bin795	10775983	B	A	B	A	A	B	A	A	B	B	B	B	A	A	A	B	B	B	A	A	B	A	A	B	A	A	B	B	B	B	B	A	B	B	B	A	A	B	A	A	A	A	B	B	A	B	A	B
Chr3_bin796	10943495	B	A	B	A	B	B	A	A	B	B	B	B	A	A	A	B	B	B	A	A	B	A	A	B	A	A	B	B	B	B	B	A	B	B	B	A	A	B	A	A	A	A	B	A	A	B	A	B
Chr3_bin797	11031307	B	A	B	A	B	B	A	A	B	B	A	B	A	A	A	B	B	B	A	B	B	A	A	A	A	A	B	B	B	B	B	A	B	B	B	A	A	B	A	A	A	A	B	A	A	B	A	B
Chr3_bin798	11217397	B	A	B	A	B	B	A	A	B	B	A	B	A	A	A	B	B	B	A	B	B	A	A	A	A	A	B	B	B	B	B	A	B	B	B	A	A	B	A	A	A	A	B	A	A	B	A	B
Chr3_bin799	12145604	B	A	B	A	B	B	A	A	B	B	A	B	A	A	A	B	B	B	A	B	B	A	A	A	A	A	B	B	B	B	B	A	B	B	B	A	A	B	A	A	A	A	B	A	A	B	A	B
Chr3_bin800	12345434	B	A	B	A	B	B	A	A	B	B	A	B	A	A	A	B	B	B	A	B	B	A	A	A	A	A	B	B	B	B	B	A	B	B	B	A	A	B	A	A	A	A	B	A	A	B	A	B
Chr3_bin801	12410689	B	A	B	A	B	B	A	A	B	B	A	B	A	A	A	B	B	B	A	B	B	A	A	A	A	A	B	B	B	B	B	A	B	B	B	A	A	B	A	A	A	A	B	A	A	B	A	B
Chr3_bin802	12479640	B	A	B	A	B	B	A	A	B	B	A	B	A	A	A	B	B	B	A	B	B	A	A	A	A	A	B	B	B	B	B	A	B	B	B	A	A	B	A	A	A	A	B	A	A	B	A	B
Chr3_bin803	12600105	B	A	B	A	B	B	A	A	B	B	A	B	A	A	A	B	B	B	A	B	B	A	A	A	A	A	B	B	B	B	B	A	B	B	B	A	A	B	A	A	A	A	B	A	A	B	A	B
Chr3_bin804	12695818	B	A	B	A	B	B	A	A	B	B	A	B	A	A	A	B	B	B	A	B	B	A	A	A	A	A	B	B	B	B	B	A	B	B	B	A	A	B	A	A	A	A	B	A	A	B	A	B
Chr3_bin805	12804624	B	A	B	A	B	B	A	A	B	B	A	B	A	A	A	B	B	B	A	B	B	A	A	A	A	A	B	B	B	B	B	A	B	B	B	A	A	B	A	A	A	A	B	A	A	B	A	B
Chr3_bin806	13142072	B	A	B	A	B	B	A	A	B	B	A	B	A	A	A	B	B	B	A	B	B	A	A	A	A	A	B	B	B	B	B	A	B	B	B	A	A	B	A	A	A	A	B	A	A	B	A	B
Chr3_bin807	13280304	B	A	B	A	B	B	A	A	B	B	A	A	A	A	A	B	B	B	A	B	B	A	A	A	A	A	B	B	B	B	B	A	B	B	B	A	A	B	A	A	A	A	B	A	A	B	A	B
Chr3_bin808	13495487	B	A	B	A	B	B	A	A	B	B	A	A	A	A	A	B	B	B	A	B	B	A	A	A	A	A	B	B	B	B	B	A	B	B	B	A	A	B	A	A	A	A	B	A	A	B	A	B
Chr3_bin809	13675639	B	A	B	A	B	B	A	A	B	B	A	A	A	A	A	B	B	B	A	B	B	A	A	A	A	A	B	B	B	B	B	A	B	B	B	A	A	B	A	A	A	A	B	A	A	B	A	B
Chr3_bin810	14041664	B	A	B	A	B	B	A	A	B	B	A	A	A	A	A	B	B	B	A	B	B	A	A	A	A	A	B	B	B	B	B	A	B	B	B	A	A	B	A	A	A	A	B	A	A	B	A	B
Chr3_bin811	14169080	B	A	B	A	B	B	A	A	B	B	A	A	A	A	A	B	B	B	A	B	B	A	A	A	A	A	B	B	B	B	B	A	B	B	B	A	A	B	A	A	A	A	B	A	A	B	A	B
Chr3_bin812	14257910	B	A	B	A	B	B	A	A	B	B	A	A	A	A	A	B	B	B	A	B	B	A	A	A	A	A	B	B	B	B	B	A	B	B	B	A	A	B	A	A	A	A	B	A	A	B	A	B
Chr3_bin813	14529319	B	A	B	A	B	B	A	A	B	B	A	A	A	A	A	B	B	B	A	B	B	A	A	A	A	A	B	B	B	B	B	A	B	B	B	A	A	B	A	A	A	A	B	A	A	B	A	B
Chr3_bin814	15111312	B	A	B	A	B	B	A	A	B	B	A	A	A	A	A	B	B	B	A	B	B	A	A	A	A	A	B	B	B	B	B	A	B	B	B	A	A	B	A	A	A	A	B	A	A	B	A	B
Chr3_bin815	15426098	B	A	B	A	B	B	A	A	B	B	A	A	A	A	A	B	B	B	A	B	B	A	A	A	A	A	B	B	B	B	B	A	B	B	B	A	A	B	A	A	A	A	B	A	A	B	A	B
Chr3_bin816	15477150	B	A	B	A	B	B	A	A	B	B	A	A	A	A	A	B	B	B	A	B	B	A	A	A	A	A	B	B	B	B	B	A	B	B	B	A	A	B	A	A	A	A	B	A	A	B	A	B
Chr3_bin817	15628391	B	A	B	A	B	B	A	A	B	B	A	A	A	A	A	B	B	B	A	B	B	A	A	A	A	A	B	B	B	B	B	A	B	B	B	A	A	B	A	A	A	A	B	A	A	B	A	B
Chr3_bin818	15697010	B	A	B	A	B	B	A	A	B	B	A	A	A	A	A	B	B	B	A	B	B	A	A	A	A	A	B	B	B	B	B	A	B	B	B	A	A	B	A	A	A	A	B	A	A	B	A	B
Chr3_bin819	16112762	B	A	B	A	B	B	A	A	B	B	A	A	A	A	A	B	B	B	A	B	B	A	A	A	A	A	B	B	B	B	B	A	B	B	B	A	A	B	A	A	A	A	B	A	A	B	A	B
Chr3_bin820	16150574	B	A	B	A	B	B	A	A	B	B	A	A	A	A	A	B	B	B	A	B	B	A	A	A	A	A	B	B	B	B	B	A	B	B	B	A	A	B	A	A	A	A	B	A	A	B	A	B
Chr3_bin821	16549329	B	A	B	A	B	B	A	A	B	B	A	A	A	A	A	B	B	B	A	B	B	A	A	A	A	A	B	B	B	B	B	A	B	B	B	A	A	B	A	A	A	A	B	A	A	B	A	B
Chr3_bin822	16818688	B	A	B	A	B	B	A	A	B	B	A	A	A	A	A	B	B	B	A	B	B	A	A	A	A	A	B	B	B	B	B	A	B	B	B	A	A	B	A	A	A	A	B	A	A	B	A	B
Chr3_bin823	17052765	B	A	B	A	B	B	A	A	B	B	A	A	A	A	A	B	B	B	A	B	B	A	A	A	A	A	B	B	B	B	B	A	B	B	B	A	A	B	A	A	A	A	B	A	A	B	A	B
Chr3_bin824	18182902	B	A	B	A	B	B	A	A	B	B	A	A	A	A	A	B	B	B	A	B	B	A	A	A	A	A	B	B	B	B	B	A	B	B	B	A	A	B	A	A	A	A	B	A	A	B	A	B
Chr3_bin825	18739050	B	A	B	A	B	B	A	A	B	B	A	A	A	A	A	B	B	B	A	B	B	A	A	A	A	A	B	B	B	B	B	A	B	B	B	A	A	B	A	A	A	A	B	A	A	B	A	B
Chr3_bin826	18918577	B	A	B	A	B	B	A	A	B	B	A	A	A	A	A	B	B	B	A	B	B	A	A	A	A	A	B	B	B	B	B	A	B	B	B	A	A	B	A	A	A	A	B	A	A	B	A	B
Chr3_bin827	19197770	B	A	B	A	B	B	A	A	B	B	A	A	A	A	A	B	B	B	A	B	B	A	A	A	A	A	B	B	B	B	B	A	B	B	B	A	A	B	A	A	A	A	B	A	B	B	A	B
Chr3_bin828	19298216	B	A	B	A	B	B	A	A	B	B	A	A	A	A	A	B	B	B	A	B	B	A	A	A	A	A	B	B	B	B	B	A	B	B	B	A	A	B	A	A	A	A	B	A	B	B	A	B
Chr3_bin829	19356514	A	A	B	A	B	B	A	A	B	B	A	A	A	A	A	B	B	B	A	B	B	A	A	A	A	A	B	B	B	B	B	A	B	B	B	A	A	B	A	A	A	A	B	A	B	B	A	B
Chr3_bin830	19643837	A	A	B	A	B	B	A	A	B	B	A	A	A	A	A	B	B	B	A	B	B	A	A	A	A	A	B	B	B	B	B	A	B	B	B	A	A	B	A	A	A	A	B	A	B	B	A	B
Chr3_bin831	19880826	A	A	B	A	B	B	A	A	B	B	A	A	A	A	A	B	B	B	A	B	B	B	A	A	A	A	B	B	B	B	B	A	B	B	B	A	A	B	A	A	A	A	B	A	B	B	A	B
Chr3_bin832	20026476	A	A	B	A	B	B	A	A	B	B	A	A	A	A	A	B	B	B	A	B	B	B	A	A	A	A	B	B	B	B	B	A	B	B	B	A	A	B	A	A	A	A	B	A	B	B	A	B
Chr3_bin833	20339121	A	A	B	A	B	B	A	A	B	B	A	A	A	A	A	B	B	B	A	B	B	B	A	A	A	A	B	B	B	B	B	A	B	B	B	A	A	B	A	A	A	A	B	A	B	B	A	B
Chr3_bin834	20511446	A	A	B	A	B	B	A	A	B	B	A	A	A	A	A	B	B	B	A	B	B	B	A	A	A	A	B	B	B	B	B	A	B	B	B	A	A	B	A	A	A	A	B	A	B	B	A	B
Chr3_bin835	21288819	A	A	B	A	B	B	A	A	B	B	A	A	A	A	A	B	B	B	A	B	B	B	A	A	A	A	B	B	B	B	B	A	B	B	B	A	A	B	A	A	A	A	B	A	B	B	A	B
Chr3_bin836	21389577	A	A	B	A	B	B	A	A	B	B	A	A	A	A	A	B	B	B	A	B	B	B	A	A	A	A	B	B	B	B	A	A	B	B	B	A	A	B	A	A	A	A	B	A	B	B	A	B
Chr3_bin837	21633384	A	A	B	A	B	B	A	A	B	B	A	A	A	A	A	B	B	B	A	B	B	B	A	A	A	A	B	B	B	B	A	A	B	B	B	A	A	B	A	A	A	A	B	A	B	B	A	B
Chr3_bin838	21806515	A	A	B	A	B	B	A	A	B	B	A	A	A	A	A	B	B	B	A	B	B	B	A	A	A	A	B	B	B	B	A	A	B	B	B	A	A	B	A	A	A	A	B	A	B	B	A	B
Chr3_bin839	21899630	A	A	B	A	B	B	A	A	B	B	A	A	A	A	A	B	B	B	A	B	B	B	A	A	A	A	B	B	B	B	A	A	B	B	B	A	A	B	A	A	A	A	B	A	B	B	A	B
Chr3_bin840	21989538	A	A	B	A	B	B	A	A	B	B	A	A	A	A	A	B	B	B	A	B	B	B	A	A	A	A	B	B	B	B	A	A	B	B	B	A	A	B	A	A	A	A	B	A	B	B	A	B
Chr3_bin841	22141607	A	A	B	A	B	B	A	A	B	B	A	A	A	A	A	B	B	B	A	B	B	B	A	A	A	A	B	B	B	B	A	A	B	B	B	A	A	B	A	A	A	A	B	A	B	B	A	B
Chr3_bin842	22215679	A	A	B	A	B	B	A	A	B	B	A	A	A	A	A	B	B	B	A	B	B	B	A	A	A	A	B	B	B	B	A	A	B	B	B	A	A	B	A	A	A	A	B	A	B	B	A	B
Chr3_bin843	22282741	A	A	B	A	B	B	A	A	B	B	A	A	A	A	A	B	B	B	A	B	B	B	A	A	A	A	B	B	B	B	A	A	B	B	B	A	A	B	A	A	A	A	B	A	B	B	A	B
Chr3_bin844	22371374	A	A	B	A	B	B	A	A	B	B	A	A	A	A	A	B	B	B	A	B	B	B	A	A	A	A	B	B	B	B	A	A	B	B	B	A	A	B	A	A	A	A	B	A	B	B	A	B
Chr3_bin845	22487139	A	A	B	A	B	B	A	A	A	B	A	A	A	A	A	B	B	B	A	B	B	B	A	A	A	A	B	B	B	B	A	A	B	B	B	A	A	B	A	A	A	A	B	A	B	B	A	B
Chr3_bin846	23277968	A	A	B	A	B	B	A	A	A	B	A	A	A	A	A	B	B	B	A	B	B	B	A	A	A	A	B	B	B	B	A	A	B	B	B	A	A	B	A	A	A	A	B	A	B	B	A	B
Chr3_bin847	23386633	A	A	B	A	B	B	A	A	A	B	A	A	A	A	A	B	B	B	A	B	B	B	A	A	A	A	B	B	B	B	A	A	B	B	B	A	A	B	A	A	A	A	B	A	B	B	A	B
Chr3_bin848	23651681	A	A	B	A	B	B	A	A	A	B	A	A	A	A	A	B	B	B	A	B	B	B	A	A	A	A	B	B	B	B	A	A	B	B	B	A	A	B	A	A	A	A	B	A	B	B	A	B
Chr3_bin849	23868079	A	A	B	A	B	B	A	A	A	B	A	A	A	A	A	B	B	B	A	B	B	B	A	A	A	A	B	B	B	B	A	A	B	B	B	A	A	B	A	A	A	A	B	A	B	B	A	B
Chr3_bin850	24136616	A	A	B	A	B	B	A	A	A	B	A	A	A	A	A	B	B	B	A	B	B	B	A	A	A	A	B	B	B	B	A	A	B	B	B	A	A	B	A	A	A	A	B	A	B	B	A	B
Chr3_bin851	24424910	A	A	B	A	B	B	A	A	A	B	A	A	A	A	A	B	B	B	A	B	B	B	A	A	A	A	B	B	B	B	A	A	B	B	B	A	A	B	A	A	A	A	B	A	B	B	A	B
Chr3_bin852	24501405	A	A	B	A	B	B	A	A	A	B	A	A	A	A	A	B	B	B	A	B	B	B	A	A	A	A	B	B	B	B	A	A	B	B	B	A	A	B	A	A	A	A	B	A	B	B	A	B
Chr3_bin853	24595701	A	A	B	A	B	B	A	A	A	B	B	A	A	A	A	B	B	B	A	B	B	B	A	A	A	A	B	B	B	B	A	A	B	B	B	A	A	B	A	A	A	A	B	A	B	B	A	B
Chr3_bin854	24700587	A	A	B	A	B	B	A	A	A	B	B	A	A	A	A	B	B	B	A	B	B	B	A	A	A	A	B	A	B	B	A	A	B	B	B	A	A	B	A	A	A	A	B	A	B	B	A	B
Chr3_bin855	25178172	A	A	B	A	B	B	A	A	A	B	B	A	A	A	A	B	B	B	A	B	B	B	A	A	A	A	B	A	B	B	A	A	B	B	B	A	A	B	A	A	A	A	B	A	B	B	A	B
Chr3_bin856	25329442	A	A	B	A	B	B	A	A	A	B	B	A	A	A	A	B	B	B	A	B	B	B	A	B	A	A	B	A	B	B	A	A	B	B	B	A	A	B	A	A	A	A	B	A	B	B	A	B
Chr3_bin857	25564498	A	A	B	A	B	B	A	A	A	B	B	A	A	A	A	B	B	B	A	B	B	B	A	B	A	A	B	A	B	B	A	A	B	B	B	A	A	B	A	A	A	A	B	A	B	B	A	B
Chr3_bin858	25698422	A	A	B	A	B	B	A	A	A	B	B	A	A	A	A	B	B	B	A	B	B	B	A	B	A	A	B	A	B	B	A	A	B	B	B	A	A	B	A	A	A	A	B	A	B	B	A	B
Chr3_bin859	26491050	A	A	B	A	B	B	A	A	A	B	B	A	A	A	A	B	B	B	A	B	B	B	A	B	A	A	B	A	B	B	A	A	B	B	B	A	A	B	A	A	A	A	B	A	B	B	A	B
Chr3_bin860	26636741	A	A	B	A	B	B	A	A	A	B	B	A	A	A	A	B	B	B	A	B	B	B	A	B	A	A	B	A	B	B	A	A	B	B	B	A	A	B	A	A	A	A	B	A	B	B	A	B
Chr3_bin861	26730998	A	A	B	A	B	B	A	A	A	B	B	A	A	A	A	B	B	B	A	B	B	B	A	B	A	A	B	A	B	B	A	A	B	B	B	A	A	B	A	A	A	A	B	A	B	B	A	B
Chr3_bin862	26779146	A	A	B	A	B	B	A	A	A	B	B	A	A	A	A	B	B	B	A	B	B	B	A	B	A	A	B	A	B	B	A	A	B	B	B	A	A	B	A	A	A	A	B	A	B	B	A	B
Chr3_bin863	27167340	A	A	B	A	B	B	A	A	A	B	B	A	A	A	A	B	B	B	A	B	B	B	A	B	A	A	B	A	B	B	A	A	B	B	B	A	A	B	A	A	A	A	B	A	B	B	A	B
Chr3_bin864	27263325	A	A	B	A	B	B	A	A	A	B	B	A	A	A	A	B	B	B	A	B	B	B	A	B	A	A	B	A	B	B	A	A	B	B	B	A	A	B	A	A	A	A	B	A	B	B	A	B
Chr3_bin865	27409213	A	A	B	A	B	B	A	A	A	B	B	A	A	A	A	B	B	B	A	B	B	B	A	B	A	A	B	A	B	B	A	A	B	B	B	A	A	B	A	A	A	A	B	A	B	B	A	B
Chr3_bin866	27521755	A	A	B	A	B	B	A	A	A	B	B	A	A	A	A	B	B	B	A	B	B	B	A	B	A	A	B	A	B	B	A	A	B	B	B	A	A	B	A	A	A	A	B	A	B	B	A	B
Chr3_bin867	27661001	A	A	B	A	B	B	A	A	A	B	B	A	A	A	A	B	B	B	A	B	B	B	A	B	A	A	B	A	B	B	A	A	B	B	B	A	A	B	A	A	A	A	B	A	B	B	A	B
Chr3_bin868	27968690	A	A	B	A	B	B	A	A	A	B	B	A	A	A	A	B	B	B	A	B	B	B	A	B	A	A	B	A	B	B	A	A	B	B	B	A	A	B	A	A	A	A	B	A	B	B	A	B
Chr3_bin869	28146434	A	A	B	A	B	B	A	A	A	B	B	A	A	A	A	B	B	B	A	B	B	B	A	B	A	A	B	A	B	B	A	A	B	B	B	A	A	B	A	A	A	A	B	A	B	B	A	B
Chr3_bin870	28301918	A	A	B	A	B	B	A	A	A	B	B	A	A	A	A	B	B	B	A	B	B	B	A	B	A	A	B	A	B	B	A	A	B	B	B	A	A	B	A	A	A	A	B	A	B	B	A	B
Chr3_bin871	28713692	A	A	B	A	B	B	A	A	A	B	B	A	A	A	A	B	B	B	A	B	B	B	A	B	A	A	B	A	B	B	A	A	B	B	B	A	A	B	A	A	A	A	B	A	B	B	A	B
Chr3_bin872	29105650	A	A	B	A	B	B	A	A	A	B	B	A	A	A	A	B	B	B	A	B	B	B	A	B	A	A	B	A	B	B	A	A	B	B	B	A	A	B	A	A	A	A	B	A	B	B	A	B
Chr3_bin873	29237698	A	A	B	A	B	B	A	A	A	B	B	A	A	A	A	B	B	B	A	B	B	B	A	B	A	A	B	A	B	B	A	A	B	B	B	A	A	B	A	A	A	A	B	A	B	B	A	B
Chr3_bin874	29255123	A	A	B	A	B	B	A	A	A	B	B	A	A	A	A	B	B	B	A	B	B	B	A	B	A	A	B	A	B	B	A	A	B	B	B	A	A	B	A	A	A	A	B	A	B	B	A	B
Chr3_bin875	29974773	A	A	B	A	B	B	A	A	A	B	B	A	A	A	A	B	B	B	A	B	B	B	A	B	A	A	B	A	B	B	A	A	B	B	B	A	A	B	A	A	A	A	B	A	B	B	A	B
Chr3_bin876	30656665	A	A	B	A	B	B	A	A	A	B	B	A	A	A	A	B	B	B	A	B	B	B	A	B	A	A	B	A	B	B	A	A	B	B	B	A	A	B	A	A	A	A	B	A	B	B	A	B
Chr3_bin877	30766913	A	A	B	A	B	B	A	A	A	B	B	A	A	A	A	B	B	B	A	B	B	B	A	B	A	A	B	A	B	B	A	A	B	B	B	A	A	B	A	A	A	A	B	A	B	B	A	B
Chr3_bin878	31389752	A	A	B	A	B	B	A	A	A	B	B	A	A	A	A	B	B	B	A	B	B	B	A	B	A	A	B	A	B	B	A	A	B	B	B	A	A	B	A	A	A	A	B	A	B	B	A	B
Chr3_bin879	31463235	A	A	B	A	B	B	A	A	A	B	B	A	A	A	A	B	B	B	A	B	B	B	A	B	A	A	B	A	B	B	A	A	B	B	B	A	A	B	A	A	A	A	B	A	B	B	A	B
Chr3_bin880	32205421	A	A	B	A	B	B	A	A	A	B	B	A	A	A	A	B	B	B	A	B	B	B	A	B	A	A	B	A	B	B	A	A	B	B	B	A	A	B	A	A	A	A	B	A	B	B	A	B
Chr3_bin881	32514997	A	A	B	A	B	B	A	A	A	B	B	A	A	A	A	B	B	B	A	B	B	B	A	B	A	A	B	A	B	B	A	A	B	B	B	A	A	B	A	A	A	A	B	A	B	B	A	B
Chr3_bin882	32694094	A	A	B	A	B	B	A	A	A	B	B	A	A	A	A	B	B	B	A	B	B	B	A	B	A	A	B	A	B	B	A	A	B	B	B	A	A	B	A	A	A	A	B	A	B	B	A	B
Chr3_bin883	33799485	A	A	B	A	B	B	A	A	A	B	B	A	A	A	A	B	B	B	A	B	B	B	A	B	A	A	B	A	B	B	A	A	B	B	B	A	A	B	A	A	A	A	B	A	B	B	A	B
Chr3_bin884	34494589	A	A	B	A	B	B	A	A	A	B	B	A	A	A	A	B	B	B	A	B	B	B	A	B	A	A	B	A	B	B	A	A	B	B	B	A	A	B	A	A	A	A	B	A	B	B	A	B
Chr3_bin885	35245026	A	A	B	A	B	B	A	A	A	B	B	A	A	A	A	B	B	B	A	B	B	B	A	B	A	A	B	A	B	B	A	A	B	B	B	A	A	B	A	A	A	A	B	A	B	B	A	B
Chr3_bin886	35459854	A	A	B	A	B	B	B	B	A	B	B	A	A	A	A	B	B	B	A	B	B	B	A	B	A	A	B	A	B	B	A	A	B	B	B	A	A	B	A	A	A	A	B	A	B	B	A	B
Chr3_bin887	38016877	A	A	B	A	B	B	B	B	A	B	B	A	A	A	A	B	B	B	A	B	B	B	A	B	A	A	B	A	B	B	A	A	B	B	B	A	A	B	A	A	A	A	B	A	B	B	A	B
Chr3_bin888	38144145	A	A	B	A	B	B	B	B	A	B	B	A	A	A	A	B	B	B	A	B	B	B	A	B	A	A	B	A	B	B	A	A	B	B	B	A	A	B	A	A	A	A	B	A	B	B	A	B
Chr3_bin889	38239680	A	A	B	A	B	B	B	B	A	B	B	A	A	A	A	B	B	B	A	B	B	B	A	B	A	A	B	A	B	B	A	A	B	B	B	A	A	B	A	A	A	A	B	A	B	B	A	B
Chr3_bin890	38887402	A	A	B	A	B	B	B	B	A	B	B	A	A	A	A	B	B	B	A	B	B	B	A	B	A	A	B	A	B	B	A	A	B	B	B	A	A	B	A	A	A	A	B	A	B	B	A	B
Chr3_bin891	38986164	A	A	B	A	B	B	B	B	A	B	B	A	A	A	A	B	B	B	A	B	B	B	A	B	A	A	B	A	B	B	A	A	B	B	B	A	A	B	A	A	A	A	B	A	B	B	A	B
Chr3_bin892	39343429	A	A	B	A	B	B	B	B	A	B	B	A	A	A	A	B	B	B	A	B	B	B	A	B	A	A	B	A	B	B	A	A	B	B	B	A	A	B	A	A	A	A	B	A	B	B	A	B
Chr3_bin893	39386165	A	A	B	A	B	B	B	B	A	B	B	A	A	A	A	B	B	B	A	B	B	B	A	B	A	A	B	A	B	B	A	A	B	B	B	A	A	B	A	A	A	A	B	A	B	B	A	B
Chr3_bin894	39635983	A	A	B	A	B	B	B	B	A	B	B	A	A	A	A	B	B	B	A	B	B	B	A	B	A	A	B	A	B	B	A	A	B	B	B	A	A	B	A	A	A	A	B	A	B	B	A	B
Chr3_bin895	39703252	A	A	B	A	B	B	B	B	A	B	B	A	A	A	A	B	B	B	A	B	B	B	A	B	A	A	B	A	B	B	A	A	B	B	B	A	A	B	A	A	A	A	B	A	B	B	A	B
Chr3_bin896	39863849	A	A	B	A	B	B	B	B	A	B	B	A	A	A	A	B	B	B	A	B	B	B	A	B	A	A	B	A	B	B	A	A	B	B	B	A	A	B	A	A	A	A	B	A	B	B	A	B
Chr3_bin897	40541686	A	A	B	A	B	B	B	B	A	B	B	A	A	A	A	B	B	B	A	B	B	B	A	B	A	A	B	A	B	B	A	A	B	B	B	A	A	B	A	A	A	A	B	A	B	B	A	B
Chr3_bin898	40745095	A	A	B	A	B	B	B	B	A	B	B	A	A	A	A	B	B	B	A	B	B	B	A	B	A	A	B	A	B	B	A	A	B	B	B	A	A	B	A	A	A	A	B	A	B	B	A	B
Chr3_bin899	42150484	A	A	B	A	B	B	B	B	A	B	B	A	A	A	A	B	B	B	A	B	B	B	A	B	A	A	B	A	B	B	A	A	B	B	B	A	A	B	A	A	A	A	B	A	B	B	A	B
Chr3_bin900	42292715	A	A	B	A	B	B	B	B	A	B	B	A	A	A	A	B	B	B	A	B	B	B	A	B	A	A	B	A	B	B	A	A	B	B	B	A	A	B	A	A	A	A	B	A	B	B	A	B
Chr3_bin901	42745469	A	A	B	A	B	B	B	B	A	B	B	A	A	A	A	B	B	B	A	B	B	B	A	B	A	A	B	A	B	B	A	A	B	B	B	A	A	B	A	A	A	A	B	A	B	B	A	B
Chr3_bin902	42809908	A	A	B	A	B	B	B	B	A	B	B	A	A	A	A	B	B	B	A	B	B	B	A	B	A	A	B	A	B	B	A	A	B	B	B	A	A	B	B	A	A	A	B	A	B	B	A	B
Chr3_bin903	42987485	A	A	B	A	B	B	B	B	A	B	B	A	A	A	A	B	B	B	A	B	B	B	A	B	A	A	B	A	B	B	A	A	B	B	B	A	A	A	B	A	A	A	B	A	B	B	A	B
Chr3_bin904	43137246	A	A	B	A	B	B	B	B	A	B	B	A	A	A	A	B	B	B	A	B	B	B	A	B	A	A	B	A	B	B	A	A	B	B	B	A	A	A	B	A	A	A	B	A	B	B	A	B
Chr3_bin905	43179121	A	A	B	A	B	B	B	B	A	B	B	A	A	A	A	B	B	B	A	B	B	B	A	B	A	A	B	A	B	B	A	A	B	B	B	A	A	A	B	A	A	A	B	B	B	B	A	B
Chr3_bin906	43294949	A	A	B	A	B	B	B	B	A	B	B	A	A	A	A	B	B	B	A	B	B	B	A	B	A	A	B	A	B	B	A	A	B	B	B	A	A	A	B	A	A	A	B	B	B	B	A	B
Chr3_bin907	43767894	A	A	B	A	B	B	B	B	A	B	B	A	A	A	A	B	B	B	A	B	B	B	A	B	A	A	B	A	A	B	A	A	B	B	B	A	A	A	B	A	A	A	B	B	B	B	A	B
Chr3_bin908	44049120	A	A	B	A	B	B	B	B	A	B	B	A	A	A	A	B	B	B	A	B	B	B	A	B	A	A	B	A	A	B	A	A	B	B	B	A	A	A	B	A	A	A	B	B	B	B	A	B
Chr3_bin909	44442830	A	A	B	A	B	B	B	B	A	B	B	A	A	A	A	B	B	B	A	B	B	B	A	B	A	A	B	A	A	B	A	A	B	B	B	A	A	A	B	A	A	A	B	B	B	B	A	B
Chr3_bin910	44477886	A	A	B	A	B	B	B	B	A	B	B	A	A	A	A	B	B	B	A	B	B	B	A	B	A	A	B	A	A	B	A	A	B	B	B	A	A	A	B	A	A	A	B	B	B	B	A	B
Chr3_bin911	44661403	A	A	B	A	B	B	B	B	A	B	B	A	A	A	A	B	B	B	A	B	B	B	A	B	A	A	B	A	A	B	A	A	B	B	B	A	A	A	B	A	A	A	B	B	B	B	A	B
Chr3_bin912	45396567	A	A	B	A	B	B	B	B	A	B	B	A	A	A	A	B	B	B	A	B	B	B	A	B	A	A	B	A	A	B	A	A	B	B	B	A	A	A	B	A	A	A	B	B	B	B	A	B
Chr3_bin913	45772984	A	A	B	A	B	B	B	B	A	B	B	A	A	A	A	B	B	B	A	B	B	B	A	B	A	A	B	A	A	B	A	A	B	B	B	A	A	A	B	A	A	A	B	B	B	B	A	B
Chr3_bin914	46300189	A	A	B	A	B	B	B	B	A	B	B	A	A	A	A	B	B	B	A	B	B	B	A	B	A	A	B	A	A	B	A	A	B	B	B	A	A	A	B	A	A	A	B	B	B	B	A	B
Chr3_bin915	47168664	A	A	B	A	B	B	B	B	A	B	B	A	A	A	A	B	B	B	A	B	B	B	A	B	A	A	B	A	A	B	A	A	B	B	B	A	A	A	B	A	A	A	B	B	B	B	A	B
Chr3_bin916	48257435	A	A	B	A	B	B	B	B	A	B	B	A	A	A	A	B	B	B	A	B	B	B	A	B	A	A	B	A	A	B	A	A	B	B	B	A	A	A	B	A	A	A	B	B	B	B	A	B
Chr3_bin917	48695634	A	A	B	A	B	B	B	B	A	B	B	A	A	A	A	B	B	B	A	B	B	B	A	B	A	A	B	A	A	B	A	A	B	B	B	A	A	A	B	A	A	A	B	B	B	B	A	B
Chr3_bin918	48977732	A	A	B	A	B	B	B	B	A	B	B	A	A	A	A	B	B	B	A	B	B	B	A	B	A	A	B	A	A	B	A	A	B	B	B	A	A	A	A	A	A	A	B	B	B	B	A	B
Chr3_bin919	49077994	A	A	B	A	B	B	B	B	A	B	B	A	A	A	A	B	B	B	A	B	B	B	A	B	A	A	B	A	A	B	A	A	B	B	B	A	A	A	A	A	A	A	B	B	B	B	A	B
Chr3_bin920	50292453	A	A	B	A	B	B	B	B	A	B	B	A	A	A	A	B	B	B	A	B	B	B	A	B	A	A	B	A	A	B	A	A	B	B	B	A	A	A	A	A	A	A	B	B	B	B	A	B
Chr3_bin921	50740482	A	A	B	A	B	B	B	B	A	B	B	A	A	A	A	B	B	B	A	B	B	B	A	B	A	A	B	A	A	B	A	A	B	B	B	A	A	A	A	A	A	A	B	B	B	B	A	B
Chr3_bin922	51540568	A	A	B	A	B	B	B	B	A	B	B	A	A	A	A	B	B	B	A	B	B	B	A	B	A	A	B	A	A	B	A	A	B	B	B	A	A	A	A	A	A	A	B	B	B	B	A	B
Chr3_bin923	52020206	A	A	B	A	B	B	B	B	A	B	B	A	A	A	A	B	B	B	A	B	B	B	A	B	A	A	B	A	A	B	A	A	B	B	B	A	A	A	A	A	A	A	B	B	B	B	A	B
Chr3_bin924	52236802	A	A	B	A	B	B	B	B	A	B	B	A	A	A	A	B	B	B	A	B	B	B	A	B	A	A	B	A	A	B	A	A	B	B	B	A	A	A	A	A	A	A	B	B	B	B	A	B
Chr3_bin925	53123574	A	A	B	A	B	B	B	B	A	B	B	A	A	A	A	B	B	B	A	B	B	B	A	B	A	A	B	B	A	B	A	A	B	B	B	A	A	A	A	A	A	A	B	B	B	B	A	B
Chr3_bin926	53662220	A	A	B	A	B	B	B	B	A	B	B	A	A	A	A	B	B	B	A	B	B	B	A	B	A	A	B	B	A	B	A	A	B	B	B	A	A	A	A	A	A	A	B	B	B	B	A	B
Chr3_bin927	53801933	A	A	B	A	B	B	B	B	A	B	B	A	A	A	A	B	B	B	A	B	B	B	A	B	A	A	B	B	A	B	A	A	B	B	B	A	A	A	A	A	A	A	B	B	B	B	A	B
Chr3_bin928	53885476	A	A	B	A	B	B	B	B	A	B	B	A	A	A	A	B	B	B	A	B	B	B	A	B	A	A	B	B	A	B	A	A	B	B	B	A	A	A	A	A	A	A	B	B	B	B	A	B
Chr3_bin929	54181467	A	A	B	A	B	B	B	B	A	B	B	A	A	A	A	B	B	B	A	B	B	B	A	B	A	A	B	B	A	B	A	A	B	B	B	A	A	A	A	A	A	A	B	B	B	B	A	B
Chr3_bin930	54349059	A	A	B	A	B	B	B	B	A	B	B	A	A	A	A	B	B	B	A	B	B	B	A	B	A	A	B	B	A	B	A	A	B	B	B	A	A	A	A	A	A	A	B	B	B	B	A	B
Chr3_bin931	54645122	A	A	B	A	B	B	B	B	A	B	B	A	A	A	A	B	B	B	A	B	B	B	A	B	A	A	B	B	A	B	A	A	B	B	B	A	A	A	A	A	A	A	B	B	B	B	A	B
Chr3_bin932	55725941	A	A	B	A	B	B	B	B	A	B	B	A	A	A	A	B	B	B	A	B	B	B	A	B	A	A	B	B	A	B	A	A	B	B	B	A	A	A	A	A	A	A	B	B	B	B	A	B
Chr3_bin933	55997796	A	A	B	A	B	B	B	B	A	B	B	A	A	A	A	B	B	B	A	B	B	B	A	B	A	A	B	B	A	B	A	A	B	B	B	A	A	A	A	A	A	A	B	B	B	B	A	B
Chr3_bin934	56650788	A	A	B	A	B	B	B	B	A	B	B	A	A	A	A	B	B	B	A	B	B	B	A	B	A	A	B	B	A	B	A	A	B	B	B	A	A	A	A	A	A	A	B	B	B	B	A	B
Chr3_bin935	56999738	A	A	B	A	B	B	B	B	A	B	B	A	A	A	A	B	B	B	A	B	B	B	A	B	A	A	B	B	A	B	A	A	B	B	B	A	A	A	A	A	A	A	B	B	B	B	A	B
Chr3_bin936	57555803	A	A	B	A	B	B	B	B	A	B	B	A	A	A	A	B	B	B	A	B	B	B	A	B	A	A	B	B	A	B	A	A	B	B	B	A	A	A	A	A	A	A	B	B	B	B	A	B
Chr3_bin937	57987063	A	A	B	A	B	B	B	B	A	B	B	A	A	A	A	B	B	B	A	B	B	B	A	B	A	A	B	B	A	B	A	A	B	B	B	A	A	A	A	A	A	A	B	B	B	B	A	B
Chr3_bin938	58187631	A	A	B	A	B	B	B	B	A	B	B	A	A	A	A	B	B	B	A	B	B	B	A	B	A	A	B	B	A	B	A	A	B	B	B	A	A	A	A	A	A	A	B	B	B	B	A	B
Chr3_bin939	59497230	A	A	B	A	B	B	B	B	A	B	B	A	A	A	A	B	B	B	A	B	B	B	A	B	A	A	B	B	A	B	A	A	B	B	B	A	A	A	A	A	A	A	B	B	B	B	A	B
Chr3_bin940	59977436	A	A	B	A	B	B	B	B	A	B	B	A	A	A	A	B	B	B	A	B	B	B	A	B	A	A	B	B	A	B	A	A	B	B	B	A	A	A	A	A	A	A	B	B	B	B	A	B
Chr3_bin941	60096421	A	A	B	A	B	B	B	B	A	B	B	A	A	A	A	B	B	B	A	B	B	B	A	B	A	A	B	B	A	B	A	A	B	B	B	A	A	A	A	A	A	A	B	B	B	B	A	B
Chr3_bin942	63264620	A	A	B	A	B	B	B	B	A	B	B	A	A	A	A	B	B	B	A	B	B	B	A	B	A	A	B	B	A	B	A	A	B	B	B	A	A	A	A	A	A	A	B	B	B	B	A	B
Chr3_bin943	63790056	A	A	B	A	B	B	B	B	A	B	B	A	A	A	A	B	B	B	A	B	B	B	A	B	A	A	B	B	A	B	A	A	B	B	B	A	A	A	A	A	A	A	B	B	B	B	A	B
Chr3_bin944	63988524	A	A	B	A	B	B	B	B	A	B	B	A	A	A	A	B	B	B	A	B	B	B	A	B	A	A	B	B	A	B	A	A	B	B	B	A	A	A	A	A	A	A	B	B	B	B	A	B
Chr3_bin945	64137366	A	A	B	A	B	B	B	B	A	B	B	A	A	A	A	B	B	B	A	B	B	B	A	B	A	A	B	B	A	B	A	A	B	B	B	A	A	A	A	A	A	A	B	B	B	B	A	B
Chr3_bin946	64197786	A	A	B	A	B	B	B	B	A	B	B	A	A	A	A	B	B	B	A	B	B	B	A	B	A	A	B	B	A	B	A	A	B	B	B	A	A	A	A	A	A	A	B	B	B	B	A	B
Chr3_bin947	64787291	A	A	B	A	B	B	B	B	A	B	B	A	A	A	A	B	B	B	A	B	B	B	A	B	A	A	B	B	A	B	A	A	B	B	B	A	A	A	A	A	A	A	B	B	B	B	A	B
Chr3_bin948	65616878	A	A	B	A	B	B	B	B	A	B	B	A	A	A	A	B	B	B	A	B	B	B	A	B	A	A	B	A	A	B	A	A	B	B	B	A	A	A	A	A	A	A	B	B	B	B	A	B
Chr3_bin949	65890790	A	A	B	A	B	B	B	B	A	B	B	A	A	A	A	B	B	B	A	B	B	B	A	B	A	A	B	A	A	B	A	A	B	B	B	A	A	A	A	A	A	A	B	B	B	B	A	B
Chr3_bin950	66050636	A	A	B	A	B	B	B	B	A	B	B	A	A	A	A	B	B	B	A	B	B	B	A	B	A	A	B	A	A	B	A	A	B	B	B	A	A	A	A	A	A	A	B	B	B	B	A	B
Chr3_bin951	66732028	A	A	B	A	B	B	B	B	A	B	B	A	A	A	A	B	B	B	A	B	B	B	A	B	A	A	B	A	A	B	A	A	B	B	B	A	A	A	A	A	A	A	B	B	B	B	A	B
Chr3_bin952	66903085	A	A	B	A	B	B	B	B	A	B	B	A	A	A	A	B	B	B	A	B	B	B	A	B	A	A	B	B	A	B	A	A	B	B	B	A	A	A	A	A	A	A	B	B	B	B	A	B
Chr3_bin953	67099452	A	A	B	A	B	B	B	B	A	B	B	A	A	A	A	B	B	B	A	B	B	B	A	B	A	A	B	B	A	B	A	A	B	B	B	A	A	A	A	A	A	A	B	B	B	B	A	B
Chr3_bin954	67303334	A	A	B	A	B	B	B	B	A	B	B	A	A	A	A	B	B	B	A	B	B	B	A	B	A	A	B	B	A	B	A	A	B	B	B	A	A	A	A	A	A	A	B	B	B	B	A	B
Chr3_bin955	69347893	A	A	B	A	B	B	B	B	A	B	B	A	A	A	A	B	B	B	A	B	B	B	A	B	A	A	B	B	A	B	A	A	B	B	B	A	A	A	A	A	A	A	B	B	B	B	A	B
Chr3_bin956	69738430	A	A	B	A	B	B	B	B	A	B	B	A	A	A	A	B	B	B	A	B	B	B	A	B	A	A	B	B	A	B	A	A	B	B	B	A	A	A	A	A	A	A	B	B	B	B	A	B
Chr3_bin957	69802768	A	A	B	A	B	B	B	B	A	B	B	A	A	A	A	B	B	B	A	B	B	B	A	B	A	A	B	B	A	B	A	A	B	B	B	A	A	A	A	A	A	A	B	B	B	B	A	B
Chr3_bin958	70902407	A	A	B	A	B	B	B	B	A	B	B	A	A	A	A	B	B	B	A	B	B	B	A	B	A	A	B	B	A	B	A	A	B	B	B	A	A	A	A	A	A	A	B	B	B	B	A	B
Chr3_bin959	71622184	A	A	B	A	B	B	B	B	A	B	B	A	A	A	A	B	B	B	A	B	B	B	A	B	A	A	B	B	A	B	A	A	B	B	B	A	A	A	A	A	A	A	B	B	B	B	A	B
Chr3_bin960	71723248	A	A	B	A	B	B	B	B	A	B	B	A	A	A	A	B	B	B	A	B	B	B	A	B	A	A	B	B	A	B	A	A	B	B	B	A	A	A	A	A	A	A	B	B	B	B	A	B
Chr3_bin961	72243926	A	A	B	A	B	B	B	B	A	B	B	A	A	A	A	B	B	B	A	B	B	B	A	B	A	A	B	B	A	B	A	A	B	B	B	A	A	A	A	A	A	A	B	B	B	B	A	B
Chr3_bin962	72400129	A	A	B	A	B	B	B	B	A	B	B	A	A	A	A	B	B	B	A	B	B	B	A	B	A	A	B	B	A	B	A	A	B	B	B	A	A	A	A	A	A	A	B	B	B	B	A	B
Chr3_bin963	72831977	A	A	B	A	B	B	B	B	A	B	B	A	A	A	A	B	B	B	A	B	B	B	A	B	A	A	B	B	A	B	A	A	B	B	B	A	A	A	A	A	A	A	B	B	B	B	A	B
Chr3_bin964	73223993	A	A	B	A	B	B	B	B	A	B	B	A	A	A	A	B	B	B	A	B	B	B	A	B	A	A	B	B	A	B	A	A	B	B	B	A	A	A	A	A	A	A	B	B	B	B	A	B
Chr3_bin965	73856674	A	A	B	A	B	B	B	B	A	B	B	A	A	A	A	B	B	B	A	B	B	B	A	B	A	A	B	B	A	B	A	A	B	B	B	A	A	A	A	A	A	A	B	B	B	B	A	B
Chr3_bin966	74281521	A	A	B	A	B	B	B	B	A	B	B	A	A	A	A	B	B	B	A	B	B	B	A	B	A	A	B	B	A	B	A	A	B	B	B	A	A	A	A	A	A	A	B	B	B	B	A	B
Chr3_bin967	75267193	A	A	B	A	B	B	B	B	A	B	B	A	A	A	A	B	B	B	A	B	B	B	A	B	A	A	B	B	A	B	A	A	B	B	B	A	A	A	A	A	A	A	B	B	B	B	A	B
Chr3_bin968	75597280	A	A	B	A	B	B	B	B	A	B	B	A	A	A	A	B	B	B	A	B	B	B	A	B	A	A	B	B	A	B	A	A	B	B	B	A	A	A	A	A	A	A	B	B	B	B	A	B
Chr3_bin969	76122286	A	A	B	A	B	B	B	B	A	B	B	A	A	A	A	B	B	B	A	B	B	B	A	B	A	A	B	B	A	B	A	A	B	B	B	A	A	A	A	A	A	A	B	B	B	B	A	B
Chr3_bin970	76315495	A	A	B	A	B	B	B	B	A	B	B	A	A	A	A	B	B	B	A	B	B	B	A	B	A	A	B	B	A	B	A	A	B	B	B	A	A	A	A	A	A	A	B	B	B	B	A	B
Chr3_bin971	76632139	A	A	B	A	B	B	B	B	A	B	B	A	A	A	A	B	B	B	A	B	B	B	A	B	A	A	B	B	A	B	A	A	B	B	B	A	A	A	A	A	A	A	B	B	B	B	A	B
Chr3_bin972	76704144	A	A	B	A	B	B	B	B	A	B	B	A	A	A	A	B	B	B	A	B	B	B	A	B	A	A	B	B	A	B	A	A	B	B	B	A	A	A	A	A	A	A	B	B	B	B	A	B
Chr3_bin973	76896307	A	A	B	A	B	B	B	B	A	B	B	A	A	A	A	B	B	B	A	B	B	B	A	B	A	A	B	B	A	B	A	A	B	B	B	A	A	A	A	A	A	A	B	B	B	B	A	B
Chr3_bin974	77330583	A	A	B	A	B	B	B	B	A	B	B	A	A	A	A	B	B	B	A	B	B	B	A	B	A	A	B	B	A	B	A	A	B	B	B	A	A	A	A	A	A	A	B	B	B	B	A	B
Chr3_bin975	77444879	A	A	B	A	B	B	B	B	A	B	B	A	A	A	A	B	B	B	A	B	B	B	A	B	A	A	B	B	A	B	A	A	B	B	B	A	A	A	A	A	A	A	B	B	B	B	A	B
Chr3_bin976	77542318	A	A	B	A	B	B	B	B	A	B	B	A	A	A	A	B	B	B	A	B	B	B	A	B	A	A	B	B	A	B	A	A	B	B	B	A	A	A	A	A	A	A	B	B	B	B	A	B
Chr3_bin977	78157808	A	A	B	A	B	B	B	B	A	B	B	A	A	A	A	B	B	B	A	B	B	B	A	B	A	A	B	B	A	B	A	A	B	B	B	A	A	A	A	A	A	A	B	B	B	B	A	B
Chr3_bin978	79580193	A	A	B	A	B	B	B	B	A	B	B	A	A	A	A	B	B	B	A	B	B	B	A	B	A	A	B	B	A	B	A	A	B	B	B	A	A	A	A	A	A	A	B	B	B	B	A	B
Chr3_bin979	80154581	A	A	B	A	B	B	B	B	A	B	B	A	A	A	A	B	B	B	A	B	B	B	A	B	A	A	B	B	A	B	A	A	B	B	B	A	A	A	A	A	A	A	B	B	B	B	A	B
Chr3_bin980	80619797	A	A	B	A	B	B	B	B	A	B	B	A	A	A	A	B	B	B	A	B	B	B	A	B	A	A	B	B	A	B	A	A	B	B	B	A	A	A	A	A	A	A	B	B	B	B	A	B
Chr3_bin981	80684727	A	A	B	A	B	B	B	B	A	B	B	A	A	A	A	B	B	B	A	B	B	B	A	B	A	A	B	B	A	B	A	A	B	B	B	A	A	A	A	A	A	A	B	B	B	B	A	B
Chr3_bin982	81009434	A	A	B	A	B	B	B	B	A	B	B	A	A	A	A	B	B	B	A	B	B	B	A	B	A	A	B	B	A	B	A	A	B	B	B	A	A	A	A	A	A	A	B	B	B	B	A	B
Chr3_bin983	81217184	A	A	B	A	B	B	B	B	A	B	B	A	A	A	A	B	B	B	A	B	B	B	A	B	A	A	B	B	A	B	A	A	B	B	B	A	A	A	A	A	A	A	B	B	B	B	A	B
Chr3_bin984	82921339	A	A	B	A	B	B	B	B	A	B	B	A	A	A	A	B	B	B	A	B	B	B	A	B	A	A	B	B	A	B	A	A	B	B	B	A	A	A	A	A	A	A	B	B	B	B	A	B
Chr3_bin985	83522542	A	A	B	A	B	B	B	B	A	B	B	A	A	A	A	B	B	B	A	B	B	B	A	B	A	A	B	B	A	B	A	A	B	B	B	A	A	A	A	A	A	A	B	B	B	B	A	B
Chr3_bin986	83662580	A	A	B	A	B	B	B	B	A	B	B	A	A	A	A	B	B	B	A	B	B	B	A	B	A	A	B	B	A	B	A	A	B	B	B	A	A	A	A	A	A	A	B	B	B	B	A	B
Chr3_bin987	84025298	A	A	B	A	B	B	B	B	A	B	B	A	A	A	A	B	B	B	A	B	B	B	A	B	A	A	B	B	A	B	A	A	B	B	B	A	A	A	A	A	A	A	B	B	B	B	A	B
Chr3_bin988	86271897	A	A	B	A	B	B	B	B	A	B	B	A	A	A	A	B	B	B	A	B	B	B	A	B	A	A	B	B	A	B	A	A	B	B	B	A	A	A	A	A	A	A	B	B	B	B	A	B
Chr3_bin989	86748348	A	A	B	A	B	B	B	B	A	B	B	A	A	A	A	B	B	B	A	B	B	B	A	B	A	A	B	B	A	B	A	A	B	B	B	A	A	A	A	A	A	A	B	B	B	B	A	B
Chr3_bin990	86902365	A	A	B	A	B	B	B	B	A	B	B	A	A	A	A	B	B	B	A	B	B	B	A	B	A	A	B	B	A	B	A	A	B	B	B	A	A	A	A	A	A	A	B	B	B	B	A	B
Chr3_bin991	87084089	A	A	B	A	B	B	B	B	A	B	B	A	A	A	A	B	B	B	A	B	B	B	A	B	A	A	B	B	A	B	A	A	B	B	B	A	A	A	A	A	A	A	B	B	B	B	A	B
Chr3_bin992	87321139	A	A	B	A	B	B	B	B	A	B	B	A	A	A	A	B	B	B	A	B	B	B	A	B	A	A	B	B	A	B	A	A	B	B	B	A	A	A	A	A	A	A	B	B	B	B	A	B
Chr3_bin993	87509862	A	A	B	A	B	B	B	B	A	B	B	A	A	A	A	B	B	B	A	B	B	B	A	B	A	A	B	B	A	B	A	A	B	B	B	A	A	A	A	A	A	A	B	B	B	B	A	B
Chr3_bin994	87835290	A	A	B	A	B	B	B	B	A	B	B	A	A	A	A	B	B	B	A	B	B	B	A	B	A	A	B	B	A	B	A	A	B	B	B	A	A	A	A	A	A	A	B	B	B	B	A	B
Chr3_bin995	87857160	A	A	B	A	B	B	B	B	A	B	B	A	A	A	A	B	B	B	A	B	B	B	A	B	A	A	B	B	A	B	A	A	B	B	B	A	A	A	A	A	A	A	B	B	B	B	A	B
Chr3_bin996	88919214	A	A	B	A	B	B	B	B	A	B	B	A	A	A	A	B	B	B	A	B	B	B	A	B	A	A	B	B	A	B	A	A	B	B	B	A	A	A	A	A	A	A	B	B	B	B	A	B
Chr3_bin997	88988949	A	A	B	A	B	B	B	B	A	B	B	A	A	A	A	B	B	B	A	B	B	B	A	B	A	A	B	B	A	B	A	A	B	B	B	A	A	A	A	A	A	A	B	B	B	B	A	B
Chr3_bin998	89892080	A	A	B	A	B	B	B	B	A	B	B	A	A	A	A	B	B	B	A	B	B	B	A	B	A	A	B	B	A	B	A	A	B	B	B	A	A	A	A	A	A	A	B	B	B	B	A	B
Chr3_bin999	90192550	A	A	B	A	B	B	B	B	A	B	B	A	A	A	A	B	B	B	A	B	B	B	A	B	A	A	B	B	A	B	A	A	B	B	B	A	A	A	A	A	A	A	B	B	B	B	A	B
Chr3_bin1000	90431593	A	A	B	A	B	B	B	B	A	B	B	A	A	A	A	B	B	B	A	B	B	B	A	B	A	A	B	B	A	B	A	A	B	B	B	A	A	A	A	A	A	A	B	B	B	B	A	B
Chr3_bin1001	90634679	A	A	B	A	B	B	B	B	A	B	B	A	A	A	A	B	B	B	A	B	B	B	A	B	A	A	B	B	A	B	A	A	B	B	B	A	A	A	A	A	A	A	B	B	B	B	A	B
Chr3_bin1002	90859612	A	A	B	A	B	B	B	B	A	B	B	A	A	A	A	B	B	B	A	B	B	B	A	B	A	A	B	B	A	B	A	A	B	B	B	A	A	A	A	A	A	A	B	B	B	B	A	B
Chr3_bin1003	91069138	A	A	B	A	B	B	B	B	A	B	B	A	A	A	A	B	B	B	A	B	B	B	A	B	A	A	B	B	A	B	A	A	B	B	B	A	A	A	A	A	A	A	B	B	B	B	A	B
Chr3_bin1004	91166845	A	A	B	A	B	B	B	B	A	B	B	A	A	A	A	B	B	B	A	B	B	B	A	B	A	A	B	B	A	B	A	A	B	B	B	A	A	A	A	A	A	A	B	B	B	B	A	B
Chr3_bin1005	91250449	A	A	B	A	B	B	B	B	A	B	B	A	A	A	A	B	B	B	A	B	B	B	A	B	A	A	B	B	A	B	A	A	B	B	B	A	A	A	A	A	A	A	B	B	B	B	A	B
Chr3_bin1006	92324892	A	A	B	A	B	B	B	B	A	B	B	A	A	A	A	B	B	B	A	B	B	B	A	B	A	A	B	B	A	B	A	A	B	B	B	A	A	A	A	A	A	A	B	B	B	B	A	B
Chr3_bin1007	92506062	A	A	B	A	B	B	B	B	A	B	B	A	A	A	A	B	B	B	A	B	B	B	A	B	A	A	B	B	A	B	A	A	B	B	B	A	A	A	A	A	A	A	B	B	B	B	A	B
Chr3_bin1008	92822757	A	A	B	A	B	B	B	B	A	B	B	A	A	A	A	B	B	B	A	B	B	B	A	B	A	A	B	B	A	B	A	A	B	B	B	A	A	A	A	A	A	A	B	B	B	B	A	B
Chr3_bin1009	93190209	A	A	B	A	B	B	B	B	A	B	B	A	A	A	A	B	B	B	A	B	B	B	A	B	A	A	B	B	A	B	A	A	B	B	B	A	A	A	A	A	A	A	B	B	B	B	A	B
Chr3_bin1010	93531052	A	A	B	A	B	B	B	B	A	B	B	A	A	A	A	B	B	B	A	B	B	B	A	B	A	A	B	B	A	B	A	A	B	B	B	A	A	A	A	A	A	A	B	B	B	B	A	B
Chr3_bin1011	95014682	A	A	B	A	B	B	B	B	A	B	B	A	A	A	A	B	B	B	A	B	B	B	A	B	A	A	B	B	A	B	A	A	B	B	B	A	A	A	A	A	A	A	B	B	B	B	A	B
Chr3_bin1012	95509129	A	A	B	A	B	B	B	B	A	B	B	A	A	A	A	B	B	B	A	B	B	B	A	B	A	A	B	B	A	B	A	A	B	B	B	A	A	A	A	A	A	A	B	B	B	B	A	B
Chr3_bin1013	96411349	A	A	B	A	B	B	B	B	A	B	B	A	A	A	A	B	B	B	A	B	B	B	A	B	A	A	B	B	A	B	A	A	B	B	B	A	A	A	A	A	A	A	B	B	B	B	A	B
Chr3_bin1014	96474723	A	A	B	A	B	B	B	B	A	B	B	A	A	A	A	B	B	B	A	B	B	B	A	B	A	A	B	B	A	B	A	A	B	B	B	A	A	A	A	A	A	A	B	B	B	B	A	B
Chr3_bin1015	96662253	A	A	B	A	B	B	B	B	A	B	B	A	A	A	A	B	B	B	A	B	B	B	A	B	A	A	B	B	A	B	A	A	B	B	B	A	A	A	A	A	A	A	B	B	B	B	A	B
Chr3_bin1016	96834864	A	A	B	A	B	B	B	B	A	B	B	A	A	A	A	B	B	B	A	B	B	B	A	B	A	A	B	B	A	B	A	A	B	B	B	A	A	A	A	A	A	A	B	B	B	B	A	B
Chr3_bin1017	96910000	A	A	B	A	B	B	B	B	A	B	B	A	A	A	A	B	B	B	A	B	B	B	A	B	A	A	B	B	A	B	A	A	B	B	B	A	A	A	A	A	A	A	B	B	B	B	A	B
Chr3_bin1018	97176245	A	A	B	A	B	B	B	B	A	B	B	A	A	A	A	B	B	B	A	B	B	B	A	B	A	A	B	B	A	B	A	A	B	B	B	A	A	A	A	A	A	A	B	B	B	B	A	B
Chr3_bin1019	97621687	A	A	B	A	B	B	B	B	A	B	B	A	A	A	A	B	B	B	A	B	B	B	A	B	A	A	B	B	A	B	A	A	B	B	B	A	A	A	A	A	A	A	B	B	B	B	A	B
Chr3_bin1020	98507164	A	A	B	A	B	B	B	B	A	B	B	A	A	A	A	B	B	B	A	B	B	B	A	B	A	A	B	B	A	B	A	A	B	B	B	A	A	A	A	A	A	A	B	B	B	B	A	B
Chr3_bin1021	99552853	A	A	B	A	B	B	B	B	A	B	B	A	A	A	A	B	B	B	A	B	B	B	A	B	A	A	B	B	A	B	A	A	B	B	B	A	A	A	A	A	A	A	B	B	B	B	A	B
Chr3_bin1022	99722626	A	A	B	A	B	B	B	B	A	B	B	A	A	A	A	B	B	B	A	B	B	B	A	B	A	A	B	B	A	B	A	A	B	B	B	A	A	A	A	A	A	A	B	B	B	B	A	B
Chr3_bin1023	101121309	A	A	B	A	B	B	B	B	A	B	B	A	A	A	A	B	B	B	A	B	B	B	A	B	A	A	B	B	A	B	A	A	B	B	B	A	A	A	A	A	A	A	B	B	B	B	A	B
Chr3_bin1024	101873535	A	A	B	A	B	B	B	B	A	B	B	A	A	A	A	B	B	B	A	B	B	B	A	B	A	A	B	B	A	B	A	A	B	B	B	A	A	A	A	A	A	A	B	B	B	B	A	B
Chr3_bin1025	102702811	A	A	B	A	B	B	B	B	A	B	B	A	A	A	A	B	B	B	A	B	B	B	A	B	A	A	B	B	A	B	A	A	B	B	B	A	A	A	A	A	A	A	B	B	B	B	A	B
Chr3_bin1026	102902061	A	A	B	A	B	B	B	B	A	B	B	A	A	A	A	B	B	B	A	B	B	B	A	B	A	A	B	B	A	B	A	A	B	B	B	A	A	A	A	A	A	A	B	B	B	B	A	B
Chr3_bin1027	103385501	A	A	B	A	B	B	B	B	A	B	B	A	A	A	A	B	B	B	A	B	B	B	A	B	A	A	B	B	A	B	A	A	B	B	B	A	A	A	A	A	A	A	B	B	B	B	A	B
Chr3_bin1028	104630480	A	A	B	A	B	B	B	B	A	B	B	A	A	A	A	B	B	B	A	B	B	B	A	B	A	A	B	B	A	B	A	A	B	B	B	A	A	A	A	A	A	A	B	B	B	B	A	B
Chr3_bin1029	104783957	A	A	B	A	B	B	B	B	A	B	B	A	A	A	A	B	B	B	A	B	B	B	A	B	A	A	B	B	A	B	A	A	B	B	B	A	A	A	A	A	A	A	B	B	B	B	A	B
Chr3_bin1030	105446429	A	A	B	A	B	B	B	B	A	B	B	A	A	A	A	B	B	B	A	B	B	B	A	B	A	A	B	B	A	B	A	A	B	B	B	A	A	A	A	A	A	A	B	B	B	B	A	B
Chr3_bin1031	105617554	A	A	B	A	B	B	B	B	A	B	B	A	A	A	A	B	B	B	A	B	B	B	A	B	A	A	B	B	A	B	A	A	B	B	B	A	A	A	A	A	A	A	B	B	B	B	A	B
Chr3_bin1032	106734849	A	A	B	A	B	B	B	B	A	B	B	A	A	A	A	B	B	B	A	B	B	B	A	B	A	A	B	B	A	B	A	A	B	B	B	A	A	A	A	A	A	A	B	B	B	B	A	B
Chr3_bin1033	107253754	A	A	B	A	B	B	B	B	A	B	B	A	A	A	A	B	B	B	A	B	B	B	A	B	A	A	B	B	A	B	A	A	B	B	B	A	A	A	A	A	A	A	B	B	B	B	A	B
Chr3_bin1034	107406108	A	A	B	A	B	B	B	B	A	B	B	A	A	A	A	B	B	B	A	B	B	B	A	B	A	A	B	B	A	B	A	A	B	B	B	A	A	A	A	A	A	A	B	B	B	B	A	B
Chr3_bin1035	108549413	A	A	B	A	B	B	B	B	A	B	B	A	A	A	A	B	B	B	A	B	B	B	A	B	A	A	B	B	A	B	A	A	B	B	B	A	A	A	A	A	A	A	B	B	B	B	A	B
Chr3_bin1036	109105761	A	A	B	A	B	B	B	B	A	B	B	A	A	A	A	B	B	B	A	B	B	B	A	B	A	A	B	B	A	B	A	A	B	B	B	A	A	A	A	A	A	A	B	B	B	B	A	B
Chr3_bin1037	109690101	A	A	B	A	B	B	B	B	A	B	B	A	A	A	A	B	B	B	A	B	B	B	A	B	A	A	B	B	A	B	A	A	B	B	B	A	A	A	A	A	A	A	B	B	B	B	A	B
Chr3_bin1038	110277276	A	A	B	A	B	B	B	B	A	B	B	A	A	A	A	B	B	B	A	B	B	B	A	B	A	A	B	B	A	B	A	A	B	B	B	A	A	A	A	A	A	A	B	B	B	B	A	B
Chr3_bin1039	110570008	A	A	B	A	B	B	B	B	A	B	B	A	A	A	A	B	B	B	A	B	B	B	A	B	A	A	B	B	A	B	A	A	B	B	B	A	A	A	A	A	A	A	B	B	B	B	A	B
Chr3_bin1040	112471646	A	A	B	A	B	B	B	B	A	B	B	A	A	A	A	B	B	B	A	B	B	B	A	B	A	A	B	B	A	B	A	A	B	B	B	A	A	A	A	A	A	A	B	B	B	B	A	B
Chr3_bin1041	112792533	A	A	B	A	B	B	B	B	A	B	B	A	A	A	A	B	B	B	A	B	B	B	A	B	A	A	B	B	A	B	A	A	B	B	B	A	A	A	A	A	A	A	B	B	B	B	A	B
Chr3_bin1042	113141969	A	A	B	A	B	B	B	B	A	B	B	A	A	A	A	B	B	B	A	B	B	B	A	B	A	A	B	B	A	B	A	A	B	B	B	A	A	A	A	A	A	A	B	B	B	B	A	B
Chr3_bin1043	114554082	A	A	B	A	B	B	B	B	A	B	B	A	A	A	A	B	B	B	A	B	B	B	A	B	A	A	B	B	A	B	A	A	B	B	B	A	A	A	A	A	A	A	B	B	B	B	A	B
Chr3_bin1044	115985987	A	A	B	A	B	B	B	B	A	B	B	A	A	A	A	B	B	B	A	B	B	B	A	B	A	A	B	B	A	B	A	A	B	B	B	A	A	A	A	A	A	A	B	B	B	B	A	B
Chr3_bin1045	117434550	A	A	B	A	B	B	B	B	A	B	B	A	A	A	A	B	B	B	A	B	B	B	A	B	A	A	B	B	A	B	A	A	B	B	B	A	A	A	A	A	A	A	B	B	B	B	A	B
Chr3_bin1046	117701880	A	A	B	A	B	B	B	B	A	B	B	A	A	A	A	B	B	B	A	B	B	B	A	B	A	A	B	B	A	B	A	A	B	B	B	A	A	A	A	A	A	A	B	B	B	B	A	B
Chr3_bin1047	117890148	A	A	B	A	B	B	B	B	A	B	B	A	A	A	A	B	B	B	A	B	B	B	A	B	A	A	B	B	A	B	A	A	B	B	B	A	A	A	A	A	A	A	B	B	B	B	A	B
Chr3_bin1048	118213161	A	A	B	A	B	B	B	B	A	B	B	A	A	A	A	B	B	B	A	B	B	B	A	B	A	A	B	B	A	B	A	A	B	B	B	A	A	A	A	A	A	A	B	B	B	B	A	B
Chr3_bin1049	118433587	A	A	B	A	B	B	B	B	A	B	B	A	A	A	A	B	B	B	A	B	B	B	A	B	A	A	B	B	A	B	A	A	B	B	B	A	A	A	A	A	A	A	B	B	B	B	A	B
Chr3_bin1050	118829476	A	A	B	A	B	B	B	B	A	B	B	A	A	A	A	B	B	B	A	B	B	B	A	B	A	A	B	B	A	B	A	A	B	B	B	A	A	A	A	A	A	A	B	B	B	B	A	B
Chr3_bin1051	118892647	A	A	B	A	B	B	B	B	A	B	B	A	A	A	A	B	B	B	A	B	B	B	A	B	A	A	B	B	A	B	A	A	B	B	B	A	A	A	A	A	A	A	B	B	B	B	A	B
Chr3_bin1052	119928789	A	A	B	A	B	B	B	B	A	B	B	A	A	A	A	B	B	B	A	B	B	B	A	B	A	A	B	B	A	B	A	A	B	B	B	A	A	A	A	A	A	A	B	B	B	B	A	B
Chr3_bin1053	120006848	A	A	B	A	B	B	B	B	A	B	B	A	A	A	A	B	B	B	A	B	B	B	A	B	A	A	B	B	A	B	A	A	B	B	B	A	A	A	A	A	A	A	B	B	B	B	A	B
Chr3_bin1054	120318443	A	A	B	A	B	B	B	B	A	B	B	A	A	A	A	B	B	B	A	B	B	B	A	B	A	A	B	B	A	B	A	A	B	B	B	A	A	A	A	A	A	A	B	B	B	B	A	B
Chr3_bin1055	120378036	A	A	B	A	B	B	B	B	A	B	B	A	A	A	A	B	B	B	A	B	B	B	A	B	A	A	B	B	A	B	A	A	B	B	B	A	A	A	A	A	A	A	B	B	B	B	A	B
Chr3_bin1056	120700817	A	A	B	A	B	B	B	B	A	B	B	A	A	A	A	B	B	B	A	B	B	B	A	B	A	A	B	B	A	B	A	A	B	B	B	A	A	A	A	A	A	A	B	B	B	B	A	B
Chr3_bin1057	121036200	A	A	B	A	B	B	B	B	A	B	B	A	A	A	A	B	B	B	A	B	B	B	A	B	A	A	B	B	A	B	A	A	B	B	B	A	A	A	A	A	A	A	B	B	B	B	A	B
Chr3_bin1058	121361162	A	A	B	A	B	B	B	B	A	B	B	A	A	A	A	B	B	B	A	B	B	B	A	B	A	A	B	B	A	B	A	A	B	B	B	A	A	A	A	A	A	A	B	B	B	B	A	B
Chr3_bin1059	121548423	A	A	B	A	B	B	B	B	A	B	B	A	A	A	A	B	B	B	A	B	B	B	A	B	A	A	B	B	A	B	A	A	B	B	B	A	A	A	A	A	A	A	B	B	B	B	A	B
Chr3_bin1060	121651124	A	A	B	A	B	B	B	B	A	B	B	A	A	A	A	B	B	B	A	B	B	B	A	B	A	A	B	B	A	B	A	A	B	B	B	A	A	A	A	A	A	A	B	B	B	B	A	B
Chr3_bin1061	121944359	A	A	B	A	B	B	B	B	A	B	B	A	A	A	A	B	B	B	A	B	B	B	A	B	A	A	B	B	A	B	A	A	B	B	B	A	A	A	A	A	A	A	B	B	B	B	A	B
Chr3_bin1062	123163282	A	A	B	A	B	B	B	B	A	B	B	A	A	A	A	B	B	B	A	B	B	B	A	B	A	A	B	B	A	B	A	A	B	B	B	A	A	A	A	A	A	A	B	B	B	B	A	B
Chr3_bin1063	123674447	A	A	B	A	B	B	B	B	A	B	B	A	A	A	A	A	A	B	A	B	B	B	A	B	A	A	B	B	A	B	A	A	B	B	B	A	A	A	A	A	A	A	B	B	B	B	A	B
Chr3_bin1064	123938705	A	A	B	A	B	B	B	B	A	B	B	A	A	A	A	A	A	B	A	B	B	B	A	B	A	A	B	B	A	B	B	A	B	B	B	A	A	A	A	A	A	A	B	B	B	B	A	B
Chr3_bin1065	124619202	A	A	B	A	B	B	B	B	A	B	B	A	A	A	A	A	A	B	A	B	B	B	A	B	A	A	B	B	A	B	B	A	B	B	B	A	A	A	A	A	A	A	B	B	B	B	A	B
Chr3_bin1066	124668909	A	A	B	A	B	B	B	B	A	B	B	A	A	A	A	A	A	B	A	B	B	B	A	B	A	A	B	B	A	B	B	A	B	B	B	A	A	A	A	A	A	A	B	B	B	B	A	B
Chr3_bin1067	125037121	A	A	B	A	B	B	B	B	A	B	B	A	A	A	A	A	A	B	A	B	B	B	A	B	A	A	B	B	A	B	B	A	B	B	B	A	A	A	A	A	A	A	B	B	B	B	A	B
Chr3_bin1068	125187012	A	A	B	A	B	B	B	B	A	B	B	A	A	A	A	A	A	B	A	B	B	B	A	B	A	A	B	B	A	B	B	A	B	B	B	A	A	A	A	A	A	A	B	B	B	B	A	B
Chr3_bin1069	125341839	A	A	B	A	B	B	B	B	A	B	B	A	A	A	A	A	A	B	A	B	B	B	A	B	A	A	B	B	A	B	B	A	B	B	B	A	A	A	A	A	A	A	B	B	B	B	A	B
Chr3_bin1070	125407751	A	A	B	A	B	B	B	B	A	B	B	A	A	A	A	A	A	B	A	B	B	B	A	B	A	A	B	B	A	B	B	A	B	B	B	A	A	A	A	A	A	A	B	B	B	B	A	B
Chr3_bin1071	125541751	A	A	B	A	B	B	B	B	A	B	B	A	A	A	A	A	A	B	A	B	B	B	A	B	A	A	B	B	A	B	B	A	B	B	B	A	A	A	A	A	A	A	B	B	B	B	A	B
Chr3_bin1072	125868780	A	A	B	A	B	B	B	B	A	B	B	A	A	A	A	A	A	B	A	B	B	B	A	B	A	A	B	B	A	B	B	A	B	B	B	A	A	A	A	A	A	A	B	B	B	B	A	B
Chr3_bin1073	126138547	A	A	B	A	B	B	B	B	A	B	B	A	A	A	A	A	A	B	A	B	B	B	A	B	A	A	B	B	A	B	B	A	B	B	B	A	A	A	A	A	A	A	B	B	B	B	A	B
Chr3_bin1074	126222909	A	A	B	A	B	B	B	B	A	B	B	A	A	A	A	A	A	B	A	B	B	B	A	B	A	A	B	B	A	B	B	A	B	B	B	A	A	A	A	A	A	A	B	B	B	B	A	B
Chr3_bin1075	126441789	A	A	B	A	B	B	B	B	A	B	B	A	A	A	A	A	A	B	A	B	B	B	A	B	A	A	B	B	A	B	B	A	B	B	B	A	A	A	A	A	A	A	B	B	B	B	A	B
Chr3_bin1076	126588380	A	A	B	A	B	B	B	B	A	B	B	A	A	A	A	A	A	B	A	B	B	B	A	B	A	A	B	B	A	B	B	A	B	B	B	A	A	A	A	A	A	A	B	B	B	B	A	B
Chr3_bin1077	126857064	A	A	B	A	B	B	B	B	A	B	B	A	A	A	A	A	A	B	A	B	B	B	A	B	A	A	B	B	A	B	B	A	B	B	B	A	A	A	A	A	A	A	B	B	B	B	A	B
Chr3_bin1078	126966995	A	A	B	A	B	B	B	B	A	B	B	A	A	A	A	A	A	B	A	B	B	B	A	B	A	A	B	B	A	B	B	A	B	B	B	A	A	A	A	A	A	A	B	B	B	B	A	B
Chr3_bin1079	127122218	A	A	B	A	B	B	B	B	A	B	B	A	A	A	A	A	A	B	A	B	B	B	A	B	A	A	B	B	A	B	B	A	B	B	B	A	A	A	A	A	A	A	B	B	B	B	A	B
Chr3_bin1080	127226370	A	A	B	A	B	B	B	B	A	B	B	A	A	A	A	A	A	B	B	B	B	B	A	B	A	A	B	B	A	B	B	A	B	B	B	A	A	A	A	A	A	A	B	B	B	B	A	B
Chr3_bin1081	127285457	B	A	B	A	B	B	B	B	A	B	B	A	A	A	A	A	A	B	B	B	B	B	A	B	A	A	B	B	A	B	B	A	B	B	B	A	A	A	A	A	A	A	B	B	B	B	A	B
Chr3_bin1082	127404008	B	A	B	A	B	B	B	B	A	B	B	A	A	A	A	A	A	B	B	B	B	B	A	B	A	A	B	B	A	B	B	A	B	B	B	A	A	A	A	A	A	A	B	B	B	B	A	B
Chr3_bin1083	127593522	B	A	B	A	B	B	B	B	A	B	B	A	A	A	A	A	A	B	B	B	B	B	A	B	A	A	B	B	A	B	B	A	B	B	B	A	A	A	A	A	A	A	B	B	B	B	A	B
Chr3_bin1084	127731031	B	A	B	A	B	B	B	B	A	B	B	A	A	A	A	A	A	B	B	B	B	B	A	B	A	A	B	B	A	B	B	A	B	B	B	A	A	A	A	A	A	A	B	B	B	B	A	B
Chr3_bin1085	127815955	B	A	B	A	B	B	B	B	A	B	B	A	A	A	A	A	A	B	B	B	B	B	A	B	A	A	B	B	A	B	B	A	B	B	B	A	A	A	A	A	A	A	B	B	B	B	A	B
Chr3_bin1086	127909971	B	A	B	A	B	B	B	B	A	B	B	A	A	A	A	A	A	B	B	B	B	B	A	B	A	A	B	B	A	B	B	A	B	B	B	A	A	A	A	A	A	A	B	B	B	B	A	B
Chr3_bin1087	127969739	B	A	B	A	B	B	B	B	A	B	B	A	A	A	A	A	A	B	B	B	B	B	A	B	A	A	B	B	A	B	B	A	B	B	B	A	A	A	A	A	A	A	B	B	B	B	A	B
Chr3_bin1088	128094714	B	A	B	A	B	B	B	B	A	B	B	A	A	A	A	A	A	B	B	B	B	B	A	B	A	A	B	B	A	B	B	A	B	B	B	A	A	A	A	A	A	A	B	B	B	B	A	B
Chr3_bin1089	128236007	B	A	B	A	B	B	B	B	A	B	B	A	A	A	A	A	A	B	B	B	B	B	A	B	A	A	B	B	A	B	B	A	B	B	B	A	A	A	A	A	A	A	B	B	B	B	A	B
Chr3_bin1090	128339514	B	A	B	A	B	B	B	B	A	B	B	A	A	A	A	A	A	B	B	B	B	B	A	B	A	A	B	B	A	B	B	A	B	B	B	A	A	A	A	A	A	A	B	B	B	B	A	B
Chr3_bin1091	128532993	B	A	B	A	B	B	B	B	A	B	B	A	A	A	A	A	A	B	B	B	B	B	A	B	A	A	B	B	A	B	B	A	B	B	B	A	A	A	A	A	A	A	B	B	B	B	A	B
Chr3_bin1092	128582311	B	A	B	A	B	B	B	B	A	B	B	A	A	A	A	A	A	B	B	B	B	B	A	B	A	A	B	B	A	B	B	A	B	B	B	A	A	A	A	A	A	A	B	B	B	B	A	B
Chr3_bin1093	128716912	B	A	B	A	B	B	B	B	A	B	B	A	A	A	A	A	A	B	B	B	B	B	A	B	A	A	B	B	A	B	B	A	B	B	B	A	A	A	A	A	A	A	B	B	B	B	A	B
Chr3_bin1094	129149178	B	A	B	A	B	B	B	B	A	B	B	A	A	A	A	A	A	B	B	B	B	B	A	B	A	A	B	B	A	B	B	A	B	B	B	A	A	A	A	A	A	A	B	B	B	B	A	B
Chr3_bin1095	129233372	B	A	B	A	B	B	B	B	A	B	B	A	A	A	A	A	A	B	B	B	B	B	A	B	A	A	B	B	A	B	B	A	B	B	B	A	A	A	A	A	A	A	B	B	B	B	A	B
Chr3_bin1096	129330715	B	A	B	A	B	B	B	B	A	B	B	A	A	A	A	A	A	B	B	B	B	B	A	B	A	A	B	B	A	B	B	A	B	B	B	A	A	A	A	A	A	A	B	B	B	B	A	B
Chr3_bin1097	129386682	B	A	A	A	B	B	B	B	A	B	B	A	A	A	A	A	A	B	B	B	B	B	A	B	A	A	B	B	A	B	B	A	B	B	B	A	A	A	A	A	A	A	B	B	B	B	A	B
Chr3_bin1098	129539995	B	A	A	A	B	B	B	B	A	B	B	A	A	A	A	A	A	B	B	B	B	B	A	B	A	A	B	B	A	B	B	A	B	B	B	A	A	A	A	A	A	A	B	B	B	B	A	B
Chr3_bin1099	129641182	B	A	A	A	B	B	B	B	A	B	B	A	B	A	A	A	A	B	B	B	B	B	A	B	A	A	B	B	A	B	B	A	B	B	B	A	A	A	A	A	A	A	B	B	B	B	A	B
Chr3_bin1100	129703741	B	A	A	A	B	B	B	B	A	B	B	A	B	A	A	A	A	B	B	B	B	B	A	B	A	A	B	B	A	B	B	A	B	B	B	A	A	A	A	A	A	A	B	B	B	B	A	A
Chr3_bin1101	129840277	B	A	A	A	B	B	B	B	A	B	B	A	B	A	A	A	A	B	B	B	B	B	A	B	A	A	B	B	A	B	B	A	B	B	B	A	A	A	A	A	A	A	B	B	B	B	A	A
Chr3_bin1102	129851438	B	A	A	A	B	B	B	B	A	B	B	A	B	A	A	A	A	B	B	B	B	B	A	B	A	A	B	B	A	B	B	A	B	B	B	A	A	A	A	A	A	A	B	B	B	B	A	A
Chr3_bin1103	129968725	B	A	A	A	B	B	B	A	A	B	B	A	B	A	A	A	A	B	B	B	B	B	A	B	A	A	B	B	A	B	B	A	B	B	B	A	A	A	A	A	A	A	B	B	B	B	A	A
Chr3_bin1104	130140111	B	A	A	A	B	B	B	A	A	B	B	A	B	A	A	A	A	B	B	B	B	B	A	B	A	A	B	B	A	B	B	A	B	B	B	A	A	A	A	A	A	A	B	B	B	B	A	A
Chr3_bin1105	130203608	B	A	A	A	B	B	B	A	A	B	B	A	B	A	A	A	A	B	B	B	B	B	A	B	A	A	B	B	A	B	B	A	B	B	B	A	A	A	A	A	A	A	B	B	B	B	A	A
Chr3_bin1106	130449258	B	A	A	A	B	B	B	B	A	B	B	A	B	A	A	A	A	B	B	B	B	B	A	B	A	A	B	B	A	B	B	A	B	B	B	A	A	A	A	A	A	A	B	B	B	B	A	A
Chr3_bin1107	130574709	B	A	A	A	B	B	B	B	A	B	B	A	B	A	A	A	A	B	B	B	B	B	A	B	A	A	B	B	A	B	B	A	B	B	B	A	A	A	A	A	A	A	B	B	B	B	A	A
Chr3_bin1108	130681756	B	A	A	A	B	B	B	B	A	B	B	A	B	A	A	A	A	B	B	B	B	B	A	B	A	A	B	B	A	B	B	A	B	B	B	A	A	A	A	A	A	A	B	B	B	B	A	A
Chr3_bin1109	130799134	B	A	A	A	B	B	B	B	A	B	B	A	B	A	A	A	A	B	B	B	B	B	A	B	A	A	B	B	A	B	B	A	B	A	B	A	A	A	A	A	A	A	B	B	B	B	A	A
Chr3_bin1110	131000853	B	A	A	A	B	B	B	B	A	B	B	A	B	A	A	A	A	B	B	B	B	B	A	B	A	A	B	B	A	B	B	A	B	A	B	A	A	A	A	A	A	A	B	B	B	B	A	A
Chr3_bin1111	131102250	B	A	A	A	B	B	B	B	A	B	B	A	B	A	A	A	A	B	B	B	B	B	A	B	A	A	B	B	A	B	B	A	B	A	B	A	A	A	A	A	A	A	B	B	B	B	A	A
Chr3_bin1112	131227064	B	A	A	A	B	B	B	B	A	B	B	A	B	A	A	A	A	B	B	B	B	B	A	B	A	A	B	B	A	B	B	A	B	A	B	A	A	A	A	A	A	A	B	B	B	B	A	A
Chr3_bin1113	131345178	B	A	A	A	B	B	B	B	A	B	B	A	B	A	A	A	A	B	B	B	B	B	A	B	A	A	B	B	A	B	B	A	B	A	B	A	A	A	A	A	A	A	B	B	B	B	A	A
Chr3_bin1114	131434661	B	A	A	A	B	B	B	B	A	B	B	A	B	A	A	A	A	B	B	B	B	B	A	B	A	A	B	B	A	B	B	A	B	A	B	A	A	A	A	A	A	A	B	B	B	B	A	A
Chr3_bin1115	131472085	B	A	A	A	B	B	B	B	A	B	B	A	B	A	A	A	A	B	B	B	B	B	A	B	A	A	B	B	A	B	B	A	B	A	B	A	A	A	A	A	A	A	B	B	B	B	A	A
Chr3_bin1116	131742475	B	A	A	A	B	B	B	B	A	B	B	A	B	A	A	H	A	B	B	B	B	B	A	B	A	A	B	B	A	B	B	A	B	A	B	A	A	A	A	A	A	A	B	B	B	B	A	A
Chr3_bin1117	131842443	B	A	A	A	B	B	B	B	A	B	B	A	B	A	A	H	H	B	B	B	B	B	A	B	A	A	B	B	A	B	B	A	B	A	B	A	A	A	A	A	A	A	B	B	B	B	A	A
Chr3_bin1118	131901822	B	A	A	A	B	B	B	B	A	B	B	A	B	A	A	H	H	B	B	B	B	B	A	B	A	A	B	B	A	B	B	A	B	A	B	A	A	A	A	A	A	A	B	B	B	B	A	A
Chr3_bin1119	132018429	B	A	A	A	B	B	B	B	A	B	B	A	B	A	A	H	H	B	B	B	B	B	A	B	A	A	B	B	A	B	B	A	B	A	B	A	A	A	A	A	A	A	B	B	B	B	A	A
Chr3_bin1120	132205760	B	A	A	A	B	B	B	B	A	B	B	A	B	A	A	H	H	B	B	B	B	B	A	B	A	A	B	B	A	B	B	A	B	A	B	A	A	A	A	A	A	A	B	B	B	B	A	A
Chr3_bin1121	132349475	B	A	A	A	B	B	B	B	A	B	B	A	B	A	A	A	H	B	B	B	B	B	A	B	A	A	B	B	A	B	B	A	B	A	B	A	A	A	A	A	A	A	B	B	B	B	A	A
Chr3_bin1122	132407660	B	A	A	A	B	B	B	B	A	B	B	A	B	A	A	A	H	B	B	B	B	B	A	B	A	A	B	B	A	B	B	A	B	A	B	A	A	A	A	A	A	A	B	B	B	B	A	A
Chr3_bin1123	132459351	B	A	A	A	B	B	B	B	A	B	B	A	B	A	A	A	H	B	B	B	B	B	A	B	A	A	B	B	A	B	B	A	B	A	B	A	A	A	A	A	A	A	B	B	B	B	A	A
Chr3_bin1124	132617791	B	A	A	A	B	B	B	B	A	B	B	A	B	A	A	A	H	B	B	B	B	B	A	B	A	A	B	B	A	B	B	A	B	A	B	A	A	A	A	A	A	A	B	B	B	B	A	A
Chr3_bin1125	132726274	B	A	A	A	B	B	B	B	A	B	B	A	B	A	A	A	H	B	B	B	B	B	A	B	A	A	B	B	A	B	B	A	B	A	B	A	A	A	A	A	A	A	B	B	B	B	A	A
Chr3_bin1126	132834689	B	A	A	A	B	B	B	B	A	B	B	A	B	A	A	A	H	B	B	B	B	B	A	B	A	A	B	B	A	B	B	A	B	A	B	A	A	A	A	A	A	A	B	B	B	B	A	A
Chr3_bin1127	132927820	B	A	A	A	B	B	B	B	A	B	B	A	B	A	A	A	A	B	B	B	B	B	A	B	A	A	B	B	A	B	B	A	B	A	B	A	A	A	A	A	A	A	B	B	B	B	A	A
Chr3_bin1128	133016911	B	A	A	A	B	B	B	B	A	B	B	A	B	A	A	A	A	B	B	B	B	B	A	B	A	A	B	B	A	B	B	A	B	A	B	A	A	A	A	A	A	A	B	B	B	B	A	A
Chr3_bin1129	133145714	B	A	A	A	B	B	B	B	A	B	B	A	B	A	A	A	A	B	B	B	B	B	A	B	A	A	B	B	A	B	B	A	B	A	B	A	A	A	A	A	A	A	B	B	B	B	A	A
Chr3_bin1130	133240245	A	B	A	B	A	A	B	A	A	A	B	A	B	B	A	B	B	B	B	A	B	B	A	B	A	A	B	B	A	B	B	B	B	B	B	B	A	A	A	A	B	B	A	A	A	B	A	A
Chr3_bin1131	133348432	A	B	A	B	A	A	B	A	A	A	B	A	B	B	A	B	B	B	B	A	B	B	A	B	A	A	B	B	A	B	B	B	B	B	B	B	A	A	A	A	B	B	A	A	A	B	A	A
Chr3_bin1132	133358702	A	B	A	B	A	A	B	A	A	A	B	A	B	B	A	B	B	B	B	A	B	B	A	B	A	A	B	B	A	B	B	B	B	B	B	B	A	A	A	A	B	B	A	A	A	B	A	A
Chr3_bin1133	133478379	A	B	A	B	A	A	B	A	A	A	B	A	B	B	A	B	B	B	B	A	B	B	A	B	A	A	B	B	A	B	B	B	B	B	B	B	A	A	A	A	B	B	A	A	A	B	A	A
Chr3_bin1134	133643834	A	B	A	B	A	A	B	A	A	A	B	A	B	B	A	B	B	B	B	A	B	B	A	B	A	A	B	B	A	B	B	B	B	B	B	B	A	A	A	A	B	B	A	A	A	B	A	A
Chr3_bin1135	133737132	A	B	A	B	A	A	B	A	A	A	B	A	B	B	A	B	B	B	B	A	B	B	A	B	A	A	B	B	A	B	B	B	B	B	B	B	A	A	A	A	B	B	A	A	A	B	A	A
Chr3_bin1136	133811053	A	B	A	B	A	A	B	A	A	A	B	A	B	B	A	B	B	B	B	A	B	B	A	B	A	A	B	B	A	B	B	B	B	B	B	B	A	A	A	A	B	B	A	A	A	B	A	A
Chr3_bin1137	133894991	A	B	A	B	A	A	B	A	A	B	B	A	B	B	A	B	B	B	B	A	B	B	A	B	A	A	B	B	A	B	B	B	B	B	B	B	A	A	A	A	B	B	A	A	A	B	A	A
Chr3_bin1138	134036170	A	B	A	B	A	A	B	A	A	B	B	A	B	B	A	B	B	B	B	A	B	B	A	B	A	A	B	B	A	B	B	B	B	B	B	B	A	A	A	A	B	B	A	A	A	B	A	A
Chr3_bin1139	134102996	A	B	A	B	A	A	B	A	A	B	A	A	B	B	A	B	B	B	B	A	B	B	A	B	A	A	B	B	A	B	B	B	B	B	B	B	A	A	A	A	B	B	A	A	A	B	A	A
Chr3_bin1140	134206583	A	B	A	B	A	A	B	A	A	B	A	A	B	B	A	B	B	B	B	A	B	B	A	B	A	A	B	B	A	B	B	B	B	B	B	B	A	A	A	A	B	B	A	A	A	B	A	A
Chr3_bin1141	134398841	A	B	A	B	A	A	B	A	A	B	A	A	B	B	A	B	B	B	B	A	B	B	A	B	A	A	B	B	A	B	B	B	B	B	B	B	A	A	A	A	B	B	A	A	A	B	A	A
Chr3_bin1142	134529765	A	B	A	B	A	A	B	A	A	B	A	A	B	B	A	B	B	B	B	A	B	B	A	B	A	A	B	B	A	B	B	B	B	B	B	B	A	A	A	A	B	B	A	A	A	B	A	A
Chr3_bin1143	134632569	A	B	A	B	A	A	B	A	A	B	A	A	B	B	A	B	B	B	B	A	B	B	A	B	A	A	B	B	A	B	B	B	B	B	B	B	A	A	A	A	B	B	A	A	A	B	A	A
Chr3_bin1144	134949033	A	B	A	B	A	A	B	A	A	B	A	A	B	B	A	B	B	B	B	A	B	B	A	B	A	A	B	B	A	B	B	B	B	B	B	B	B	A	A	A	B	B	A	A	A	B	A	A
Chr3_bin1145	135129003	A	B	A	B	A	A	B	A	A	B	A	A	B	B	A	B	B	B	B	A	B	B	A	B	A	A	B	B	A	B	B	B	B	B	B	B	B	A	A	A	B	B	A	A	A	B	A	A
Chr3_bin1146	135183695	A	B	A	B	A	A	B	A	A	B	A	A	B	B	A	B	B	B	B	A	B	B	A	B	A	A	B	B	A	B	B	B	B	B	B	B	B	A	A	A	A	B	A	A	B	B	A	A
Chr3_bin1147	135286499	A	B	A	B	A	A	B	A	A	B	A	A	B	B	A	B	B	B	B	A	B	B	A	B	A	A	B	B	A	B	B	B	B	B	B	B	B	A	A	B	A	B	A	A	B	B	A	A
Chr3_bin1148	135443679	A	B	A	B	A	A	B	A	A	B	A	A	B	B	A	B	B	B	B	A	B	B	A	B	A	A	B	B	A	B	B	B	B	B	B	B	B	A	A	B	A	B	A	A	B	B	A	A
Chr3_bin1149	135510445	A	B	A	B	A	A	B	A	A	B	A	A	B	B	A	B	B	B	A	A	B	B	A	B	A	A	B	B	A	B	B	B	B	B	B	B	B	A	A	B	A	B	A	A	B	B	A	A
Chr3_bin1150	135651155	A	B	A	B	A	A	B	A	A	B	A	A	B	B	A	B	B	B	A	A	B	B	A	B	A	A	B	B	A	B	B	B	B	B	B	B	B	A	A	B	A	B	A	A	B	B	A	A
Chr3_bin1151	135924386	A	B	A	B	A	A	B	A	A	B	A	A	B	B	A	B	B	B	A	A	B	B	A	B	A	A	B	B	A	B	B	B	B	B	B	B	B	A	A	B	A	B	A	A	B	B	A	A
Chr3_bin1152	136032597	A	B	A	B	A	A	B	A	A	B	A	A	B	B	A	B	B	B	A	A	B	B	A	B	A	A	B	B	A	B	B	B	B	B	B	B	B	A	A	B	A	B	A	A	B	B	A	A
Chr3_bin1153	136133615	A	B	A	B	A	A	B	A	A	B	A	A	B	B	A	B	B	B	A	A	B	B	A	B	A	A	B	B	A	B	B	B	B	B	B	B	B	A	A	B	A	B	A	A	B	B	A	A
Chr3_bin1154	136230732	A	B	A	B	A	A	B	A	A	B	A	A	B	B	A	B	B	B	A	A	B	B	A	B	A	A	B	B	A	B	B	B	B	B	B	B	B	A	A	B	A	B	A	A	B	B	A	A
Chr3_bin1155	136267073	A	B	A	B	A	A	B	A	A	B	A	A	B	B	A	B	B	B	A	A	B	B	A	B	A	A	B	B	A	B	B	B	B	B	B	B	B	A	A	B	A	B	A	A	B	B	A	B
Chr3_bin1156	136421272	A	B	A	B	A	A	B	A	A	B	A	A	B	B	A	B	B	B	A	A	B	B	A	B	A	A	B	B	A	B	B	B	A	B	B	B	B	A	A	B	A	B	A	A	B	B	A	B
Chr3_bin1157	136460028	A	B	A	B	A	A	B	A	A	B	A	A	B	B	A	B	B	B	A	A	B	B	A	B	A	A	B	B	A	B	B	B	A	B	B	B	B	A	A	B	A	B	A	A	B	B	A	B
Chr3_bin1158	136612174	A	B	A	B	A	A	B	A	A	B	A	A	B	B	A	B	B	B	A	A	B	B	A	B	A	A	B	B	A	B	B	B	A	B	B	B	B	A	A	B	A	B	A	A	B	B	A	B
Chr3_bin1159	136748789	A	B	A	B	A	A	B	A	A	B	A	A	B	B	A	B	B	B	A	A	B	B	A	B	A	A	B	B	A	B	B	B	A	B	B	B	B	A	A	B	A	B	A	A	B	B	A	B
Chr3_bin1160	136846649	A	B	A	B	A	A	B	A	A	B	A	A	B	B	A	B	B	B	A	A	B	B	A	B	A	A	B	B	A	B	B	B	A	B	B	B	B	A	A	B	A	B	A	A	B	B	A	B
Chr3_bin1161	137042458	A	B	A	B	A	A	B	A	A	B	A	A	B	B	A	B	B	B	A	A	B	B	A	B	A	A	B	B	A	B	B	B	A	B	B	B	B	A	A	B	A	B	A	A	B	B	A	B
Chr3_bin1162	137130317	A	B	A	A	A	A	B	A	A	B	A	A	B	B	A	B	B	B	A	A	B	B	A	B	A	A	B	B	A	B	B	B	A	B	B	B	B	A	A	B	A	B	A	A	B	B	A	B
Chr3_bin1163	137176220	A	B	A	A	A	A	B	A	A	B	A	A	B	B	A	B	B	B	A	A	B	B	A	B	A	A	B	B	A	B	B	B	A	B	B	B	B	A	A	B	A	B	A	A	B	B	A	B
Chr3_bin1164	137328366	A	B	A	A	A	A	B	A	A	B	A	A	B	B	A	B	B	B	A	A	B	B	A	B	A	A	B	B	A	B	B	B	A	B	B	B	B	A	A	B	A	B	B	A	B	B	A	B
Chr3_bin1165	137518992	A	B	A	A	B	A	B	A	A	B	A	A	B	B	A	B	B	B	A	A	B	B	A	B	A	A	B	B	A	B	B	B	A	B	B	B	B	A	A	B	A	B	B	A	B	B	A	B
Chr3_bin1166	137622035	A	B	A	A	B	A	B	A	A	B	A	A	B	B	A	B	B	B	A	A	B	B	A	B	A	A	B	B	A	B	B	A	A	B	B	B	B	A	A	B	A	B	B	A	B	B	A	B
Chr3_bin1167	137726184	A	B	A	A	B	A	B	A	A	B	A	A	B	B	A	B	B	B	A	A	B	B	A	B	A	A	B	B	A	B	B	A	A	B	B	B	B	A	A	B	A	B	B	A	B	B	A	B
Chr3_bin1168	137905804	A	B	A	A	B	A	B	A	A	B	A	A	B	B	A	B	B	B	A	A	B	B	A	B	A	A	B	B	A	B	B	A	A	B	B	B	B	A	A	B	A	B	B	A	B	B	A	B
Chr3_bin1169	138213231	A	B	A	A	B	A	B	A	A	B	A	A	B	B	A	B	B	B	A	A	B	B	A	B	A	A	B	B	A	B	B	A	A	B	B	B	B	A	A	B	A	B	B	A	B	B	A	B
Chr3_bin1170	138331064	A	B	A	A	B	A	B	A	A	B	A	A	B	B	A	B	B	B	A	A	B	B	A	B	A	B	B	B	A	B	B	A	A	B	B	B	B	A	A	B	A	B	B	A	B	B	A	B
Chr3_bin1171	138434830	A	B	A	A	B	A	B	A	A	B	A	A	B	B	A	B	B	B	A	A	B	B	A	B	A	B	B	B	A	B	B	A	A	B	B	B	B	A	A	B	A	B	B	A	B	B	A	B
Chr3_bin1172	138617791	A	B	A	A	B	A	B	A	A	B	A	A	B	B	A	B	B	B	A	A	B	B	A	A	A	B	B	B	A	B	B	A	A	B	B	B	B	A	A	B	A	B	B	A	B	B	A	B
Chr3_bin1173	138716502	B	A	A	A	B	A	B	A	A	B	A	A	B	B	A	B	B	B	A	A	B	B	A	A	A	B	B	B	A	B	B	A	A	B	B	B	B	A	A	B	A	B	B	A	B	B	A	B
Chr3_bin1174	138798216	B	A	A	A	B	A	B	A	A	B	A	A	B	B	A	B	B	B	A	A	B	B	A	A	A	B	B	B	A	B	B	A	A	B	B	B	B	A	A	B	A	B	B	A	B	B	A	B
Chr3_bin1175	138886104	B	A	A	A	B	A	B	A	A	B	A	A	B	B	A	B	B	B	A	A	B	B	A	A	A	B	B	B	A	B	B	A	A	B	B	B	B	A	A	B	A	B	B	A	B	B	A	B
Chr3_bin1176	139046502	B	A	A	A	B	A	B	A	A	B	A	A	B	B	A	B	B	B	A	A	B	B	A	A	A	B	B	B	A	B	B	A	A	B	B	B	B	A	A	B	A	A	B	B	B	B	A	B
Chr3_bin1177	139141163	B	A	A	A	B	A	B	A	A	B	A	A	B	B	A	B	B	B	A	A	B	B	A	A	B	B	B	B	A	B	B	A	A	B	B	B	B	A	A	B	A	A	B	B	B	B	A	B
Chr3_bin1178	139245227	B	A	A	A	B	A	B	A	A	B	A	A	B	B	A	B	B	B	B	A	B	B	A	A	B	B	B	B	A	B	B	A	A	B	B	B	B	A	A	B	A	A	B	B	B	B	A	B
Chr3_bin1179	139343340	B	A	A	A	B	A	B	A	A	B	A	A	B	B	A	B	B	B	B	A	B	B	A	A	B	B	B	A	A	B	B	A	A	B	B	B	B	A	A	B	A	A	B	B	B	B	A	B
Chr3_bin1180	139401464	B	A	A	A	B	A	B	A	A	B	A	A	B	B	A	B	B	B	B	A	B	B	A	A	B	B	B	A	A	B	B	A	A	B	B	B	B	A	A	B	A	B	B	B	B	B	A	B
Chr3_bin1181	139451978	B	A	A	A	B	A	B	A	A	B	A	A	B	B	A	B	B	B	B	A	B	B	A	A	B	B	B	A	A	B	B	A	A	B	B	B	B	A	A	B	A	B	B	B	B	B	A	B
Chr3_bin1182	139692880	B	A	A	A	B	A	B	A	A	B	A	A	B	B	A	B	B	B	B	A	B	B	A	A	B	B	B	A	A	B	B	A	A	B	B	B	B	A	A	B	A	B	B	B	B	B	A	B
Chr3_bin1183	139799323	B	A	A	A	B	A	B	A	A	B	A	A	B	B	A	B	B	B	B	A	B	B	A	A	B	B	B	A	A	B	B	A	A	B	B	B	B	A	A	B	A	B	B	B	B	B	A	B
Chr3_bin1184	139887147	B	A	A	A	B	A	B	A	A	B	A	A	B	B	A	B	B	B	B	A	B	B	A	A	B	B	B	A	A	B	B	A	A	B	B	B	B	A	A	B	A	B	B	B	B	B	A	B
Chr3_bin1185	139993017	B	A	A	A	B	A	B	A	A	B	A	A	B	B	A	B	B	B	B	A	B	B	A	A	B	B	B	A	A	B	B	A	A	B	B	B	B	A	A	B	A	B	B	B	B	B	A	B
Chr3_bin1186	140121151	B	A	A	A	B	A	B	A	A	B	A	A	B	B	A	B	B	B	B	A	B	B	A	A	B	B	B	A	A	B	B	A	A	B	B	B	B	A	A	B	A	B	B	B	B	B	A	B
Chr3_bin1187	140190821	B	A	A	A	B	A	B	A	A	B	A	A	B	B	A	B	B	B	B	A	B	B	A	A	B	B	B	A	A	B	B	A	A	B	B	B	B	A	A	B	A	B	B	B	B	B	A	B
Chr3_bin1188	140322622	B	A	A	A	B	A	B	A	A	B	A	A	B	B	A	B	B	B	B	A	B	B	A	A	B	B	B	A	A	B	B	A	A	B	B	B	B	A	A	B	A	B	B	B	B	B	A	B
Chr3_bin1189	140400132	B	A	A	A	B	A	B	A	A	B	A	A	B	B	A	B	B	B	B	A	B	B	A	A	B	B	B	A	A	B	B	A	A	B	B	A	B	A	A	B	A	B	B	B	B	B	A	B
Chr3_bin1190	140538591	A	A	A	A	B	A	B	A	A	B	A	A	B	B	A	B	B	B	B	A	B	B	A	A	B	B	B	A	A	B	B	A	A	B	B	A	B	A	A	B	A	B	B	B	B	B	B	B
Chr3_bin1191	140606989	A	A	A	A	B	A	B	A	A	B	A	A	B	B	A	B	B	B	B	A	B	B	A	A	B	B	B	A	A	B	B	A	A	B	B	A	B	A	A	B	A	B	B	B	B	B	B	B
Chr3_bin1192	140746826	A	A	A	A	B	A	B	A	A	B	A	A	B	B	A	B	B	B	B	A	B	B	A	A	B	B	B	A	A	B	B	A	A	B	B	A	B	A	A	B	A	B	B	B	B	B	B	B
Chr3_bin1193	140816544	A	A	A	A	B	B	B	A	A	B	A	A	B	B	A	B	B	B	B	A	B	B	A	A	B	B	B	B	A	B	B	A	A	B	B	A	B	A	A	B	A	B	B	B	B	B	B	B
Chr3_bin1194	140881390	A	A	A	A	B	B	B	A	A	B	A	A	B	B	A	B	B	B	B	A	B	B	A	A	B	B	B	B	A	B	B	A	A	B	B	A	B	A	A	B	A	B	B	B	B	B	B	B
Chr3_bin1195	141037915	A	A	A	A	B	B	B	A	A	B	A	A	B	B	A	B	B	B	B	A	B	B	A	A	B	B	B	B	A	B	B	A	A	B	B	A	B	A	A	B	A	B	B	B	B	B	B	B
Chr3_bin1196	141247470	A	A	A	A	B	B	B	A	A	B	A	A	B	B	A	B	B	B	B	B	B	B	A	A	B	B	B	B	A	B	B	A	A	B	B	A	B	A	A	B	A	B	B	B	B	A	B	B
Chr3_bin1197	141312315	A	A	A	A	B	B	B	A	A	B	A	A	B	B	A	B	B	B	B	B	B	B	A	A	B	B	B	B	A	B	B	A	A	B	B	A	B	A	A	B	A	B	B	B	B	A	B	B
Chr3_bin1198	141419977	A	A	A	A	B	B	B	A	A	B	A	A	B	B	A	B	B	A	B	B	B	B	A	A	B	B	B	B	A	B	B	A	A	B	B	A	B	A	A	B	A	B	B	B	B	A	B	B
Chr3_bin1199	141523029	A	A	A	A	B	B	B	B	A	B	A	A	B	B	A	B	B	A	B	B	B	B	A	A	B	B	B	B	A	B	B	A	A	B	B	A	B	A	A	B	A	B	B	B	B	A	B	B
Chr3_bin1200	141668188	A	A	A	A	B	B	B	B	A	B	A	A	B	B	A	B	B	A	B	B	B	B	A	A	B	B	B	B	A	B	B	A	A	B	B	A	B	A	A	B	A	B	B	B	B	A	B	B
Chr3_bin1201	141825344	A	A	A	A	B	B	B	B	A	B	A	A	B	B	A	B	B	A	B	B	B	B	A	A	B	B	B	B	A	B	B	A	B	B	B	A	B	A	A	B	A	B	B	B	B	A	B	B
Chr3_bin1202	141916479	A	A	A	A	B	B	B	B	A	B	A	A	B	B	A	B	B	A	B	B	B	B	A	B	B	B	B	B	A	B	B	A	B	B	B	B	B	A	A	B	A	B	B	B	B	A	B	B
Chr3_bin1203	141967779	A	A	A	A	B	B	B	B	A	B	A	A	B	B	A	B	B	A	B	B	B	B	A	B	B	B	B	B	A	B	B	A	B	B	B	B	B	A	A	B	A	B	B	B	B	A	B	B
Chr3_bin1204	142106455	A	A	A	A	B	B	B	B	A	B	A	A	B	B	A	B	B	A	B	B	B	B	A	B	B	B	B	B	A	B	B	A	B	B	B	B	B	A	A	B	A	B	B	B	B	A	B	B
Chr3_bin1205	142215146	A	A	A	A	B	B	B	B	A	B	A	A	B	B	A	B	B	A	B	B	B	B	A	B	B	B	B	B	A	B	B	A	B	B	B	B	B	A	A	B	A	B	B	B	B	A	B	B
Chr3_bin1206	142444501	A	A	A	A	B	B	B	B	A	B	A	A	B	B	A	B	B	A	B	B	B	B	A	B	B	B	B	B	A	B	B	A	B	B	B	B	B	A	A	B	A	B	B	B	B	A	B	B
Chr3_bin1207	142468891	A	A	B	A	B	B	B	B	A	B	A	A	B	B	A	B	B	A	B	B	B	B	A	B	B	B	B	B	A	B	A	A	B	B	B	B	B	A	A	B	A	B	B	B	B	A	B	B
Chr3_bin1208	142636594	A	A	B	A	B	B	B	B	A	A	A	A	B	B	A	B	B	A	B	B	B	B	A	B	B	B	B	B	A	B	A	A	B	B	B	B	B	A	A	B	A	B	B	B	B	A	B	B
Chr3_bin1209	142679610	A	A	B	A	B	B	B	B	A	A	A	A	B	B	A	B	B	A	B	B	B	B	A	B	B	B	B	B	A	B	A	A	B	B	B	B	B	A	A	B	A	B	B	B	B	A	B	B
Chr3_bin1210	142849873	A	A	B	A	B	B	B	B	A	A	A	A	B	B	A	B	B	A	B	B	B	B	A	B	B	B	B	B	A	B	A	A	B	B	A	B	B	A	A	B	A	B	B	B	B	A	B	B
Chr3_bin1211	142862526	A	A	B	A	B	B	B	B	A	A	A	A	B	B	A	B	B	A	B	B	B	B	A	B	B	B	B	B	A	B	A	A	B	B	A	B	B	A	A	B	A	B	B	B	A	A	B	B
Chr3_bin1212	143148253	A	A	B	A	B	B	B	B	A	A	A	A	B	B	A	B	B	A	B	B	B	B	A	B	B	B	B	B	A	B	A	A	B	B	A	B	B	A	A	B	A	B	B	B	A	A	B	B
Chr3_bin1213	143221463	A	A	B	A	B	B	B	B	A	A	A	A	B	B	A	B	B	A	B	B	B	B	A	B	B	B	B	B	A	B	A	A	B	B	A	B	B	A	A	B	A	B	B	B	A	A	B	B
Chr3_bin1214	143275963	A	A	B	A	B	B	B	B	A	A	A	A	B	B	A	B	B	A	B	B	B	B	A	B	B	B	B	B	A	B	A	A	B	B	A	B	B	A	A	B	A	B	B	B	A	A	B	B
Chr3_bin1215	143408334	A	A	B	A	B	B	B	B	A	A	A	A	B	B	A	B	B	A	B	B	B	B	A	B	B	B	B	B	A	B	A	A	B	B	A	B	B	A	A	B	A	B	B	B	A	A	B	B
Chr3_bin1216	143813506	A	A	B	A	B	B	B	B	A	A	A	A	B	B	A	B	B	A	B	B	B	B	A	B	B	B	B	B	A	B	A	A	B	B	A	B	B	A	A	B	A	B	B	B	A	A	B	B
Chr4_bin1217	98212	A	B	B	A	A	A	A	A	B	B	A	B	A	B	A	A	A	A	B	A	B	B	B	B	B	B	B	A	A	B	A	B	A	B	B	B	B	B	A	B	A	A	A	A	A	B	A	B
Chr4_bin1218	245182	A	B	B	A	A	A	A	A	B	B	A	B	A	B	A	A	A	A	B	A	B	B	B	B	B	B	B	A	A	B	A	B	A	B	B	B	B	B	A	B	A	A	A	A	A	B	A	B
Chr4_bin1219	334401	A	B	B	A	A	A	A	A	B	B	A	B	A	B	A	A	A	A	B	A	B	B	B	B	B	B	B	A	A	B	A	B	A	B	B	B	B	B	A	B	A	A	A	A	A	B	A	B
Chr4_bin1220	449014	A	B	B	A	A	A	A	A	B	B	A	B	A	B	A	A	A	A	B	A	B	B	B	B	B	B	B	A	A	B	A	B	A	B	B	B	B	B	A	B	A	A	A	A	A	B	A	B
Chr4_bin1221	520720	A	B	B	A	A	A	A	A	B	B	A	B	A	B	A	A	A	A	B	A	B	B	B	B	B	B	B	A	A	B	A	B	A	B	B	B	B	B	A	A	A	A	A	A	A	B	A	B
Chr4_bin1222	623172	A	B	B	A	A	A	A	A	B	B	A	B	A	B	A	A	A	A	B	A	B	B	B	B	B	B	B	A	A	B	A	B	A	B	B	B	B	B	A	A	A	A	A	A	A	B	A	B
Chr4_bin1223	746342	A	B	B	A	A	A	A	A	B	B	A	B	A	B	A	A	A	A	B	A	B	B	B	B	B	B	B	A	A	B	A	B	A	B	B	B	B	B	A	A	A	A	A	A	A	B	A	B
Chr4_bin1224	849706	A	B	B	A	A	A	A	A	A	B	A	B	A	B	A	A	A	A	B	A	B	B	B	B	B	B	B	A	A	B	A	B	A	B	B	B	B	A	A	A	A	A	A	A	A	B	A	B
Chr4_bin1225	924551	A	B	B	A	A	A	A	A	A	B	A	B	A	B	A	A	A	A	B	A	B	B	B	B	B	B	B	A	A	B	A	B	A	B	B	B	B	A	A	A	A	A	A	A	A	B	A	B
Chr4_bin1226	1048558	A	B	B	A	A	A	A	A	A	B	A	B	A	B	A	A	A	A	B	A	B	B	B	B	B	B	B	A	A	B	A	B	A	B	B	B	B	A	A	A	A	A	A	A	A	B	A	B
Chr4_bin1227	1119941	A	B	B	A	A	A	A	A	A	B	A	B	A	B	A	A	A	A	B	A	B	B	B	B	B	B	B	A	B	B	A	B	A	B	B	B	B	A	A	A	A	A	A	A	A	B	A	B
Chr4_bin1228	1236341	A	B	B	A	A	A	A	A	A	B	A	B	A	B	A	A	A	A	B	A	B	B	B	B	B	A	B	A	B	B	A	B	A	B	B	B	B	A	A	A	A	A	A	A	A	B	A	B
Chr4_bin1229	1342252	A	B	B	A	A	A	A	A	A	B	A	B	A	B	A	A	A	A	B	A	B	B	B	B	B	A	B	A	B	B	A	B	A	B	B	B	B	A	A	A	A	A	A	A	A	B	A	B
Chr4_bin1230	1439101	A	B	B	A	A	A	A	A	A	B	A	B	A	B	A	A	A	A	B	A	B	B	B	B	B	A	B	A	B	B	A	B	A	B	B	B	B	A	A	A	A	A	A	A	B	B	A	B
Chr4_bin1231	1548798	A	B	B	A	A	A	A	A	A	B	A	B	A	B	A	A	A	A	B	A	B	B	B	B	B	A	B	A	B	B	A	B	A	B	B	B	B	A	A	A	A	A	A	A	B	B	A	B
Chr4_bin1232	1649468	A	B	B	A	A	A	A	A	A	B	A	B	A	B	A	A	A	A	B	A	B	B	B	B	B	A	B	A	B	B	A	B	A	B	B	A	B	A	A	A	A	A	A	A	B	B	A	B
Chr4_bin1233	1696704	A	B	B	A	A	A	B	A	A	B	A	B	A	B	A	A	A	A	B	A	B	B	B	B	B	A	B	A	B	B	A	B	A	B	A	A	B	B	A	A	A	A	A	B	B	B	A	B
Chr4_bin1234	1844935	A	B	B	A	A	A	B	A	A	B	A	B	A	B	A	A	A	A	B	A	B	B	B	B	B	A	B	A	B	B	A	B	A	B	A	A	B	B	A	A	A	A	A	B	B	B	A	B
Chr4_bin1235	1860978	A	B	B	A	A	A	B	A	A	B	A	B	A	B	A	A	A	A	B	A	B	B	B	B	B	A	B	A	B	B	A	B	A	B	A	A	B	B	A	A	A	A	A	B	B	B	A	B
Chr4_bin1236	2037795	A	B	B	A	A	A	B	A	A	B	A	B	A	B	A	A	A	A	B	A	B	B	B	B	B	A	B	A	B	B	A	B	A	B	A	A	B	B	A	A	A	A	A	B	B	B	A	B
Chr4_bin1237	2149472	A	B	B	A	A	A	B	A	A	B	A	B	A	B	A	A	A	A	B	A	B	B	B	B	B	A	B	A	B	B	A	B	A	B	A	A	B	B	A	A	A	A	A	B	B	B	A	B
Chr4_bin1238	2195026	A	B	B	A	A	A	B	A	A	B	A	B	A	A	A	A	A	A	B	A	B	B	B	B	B	A	B	A	B	B	A	A	A	B	A	B	B	B	A	A	A	A	A	B	B	B	A	B
Chr4_bin1239	2322470	A	B	B	A	A	A	B	A	A	B	A	B	A	A	B	A	A	A	B	A	B	B	B	B	B	A	B	A	B	B	A	A	A	B	A	B	A	B	A	A	A	A	A	B	B	B	A	B
Chr4_bin1240	2374008	A	B	B	A	A	A	B	A	A	B	A	B	A	A	B	A	A	A	A	A	B	B	B	B	B	A	B	A	B	B	A	A	A	B	A	B	A	B	A	A	A	A	A	B	B	B	A	B
Chr4_bin1241	2512760	A	B	B	A	A	A	B	A	A	B	A	B	A	A	B	A	A	A	A	A	B	B	B	B	B	A	B	A	B	B	A	A	A	B	A	B	A	B	A	A	A	A	A	B	B	B	A	B
Chr4_bin1242	2564298	A	B	B	A	A	A	B	A	A	B	A	B	A	A	B	A	A	A	A	A	B	B	B	B	B	A	B	A	B	B	A	A	A	B	A	B	A	B	A	A	A	A	A	B	B	B	A	B
Chr4_bin1243	2697401	A	B	B	A	A	A	B	A	A	B	A	B	A	A	B	A	A	A	A	A	B	B	B	B	B	A	B	A	B	B	A	A	A	B	A	B	A	B	A	A	A	A	A	B	B	B	A	B
Chr4_bin1244	2830617	A	B	B	A	A	A	B	A	A	B	A	B	A	A	B	A	A	A	A	A	B	B	B	B	B	A	B	A	B	B	A	A	A	B	A	B	A	B	A	A	A	A	B	B	B	B	A	B
Chr4_bin1245	2935463	A	B	B	A	A	A	B	A	A	B	A	B	A	A	B	A	A	A	A	B	B	B	B	B	B	A	B	A	B	B	A	A	A	B	A	B	A	B	A	A	A	A	B	A	B	B	A	B
Chr4_bin1246	3048470	A	B	B	A	A	A	B	A	A	B	A	B	A	A	B	A	A	A	A	B	B	B	B	B	B	A	B	A	B	B	A	A	A	B	A	B	A	B	A	A	A	A	B	A	B	B	A	B
Chr4_bin1247	3122732	A	B	B	A	A	A	B	A	A	B	A	B	A	A	B	A	A	A	A	B	B	B	B	B	B	A	B	A	B	B	A	A	A	B	A	B	A	B	A	A	A	A	B	A	B	B	A	B
Chr4_bin1248	3185318	A	B	B	A	A	A	B	A	A	B	A	B	A	A	B	A	A	A	A	B	B	B	B	B	B	A	B	A	B	B	A	A	A	B	A	B	A	B	A	A	A	A	B	A	B	B	A	B
Chr4_bin1249	3431541	A	B	B	A	A	A	B	A	A	B	A	B	B	A	B	A	A	A	A	B	B	B	B	B	B	A	B	A	B	B	A	A	A	B	A	B	A	B	A	A	A	A	B	A	B	B	A	B
Chr4_bin1250	3545660	A	B	B	A	A	A	B	A	A	B	A	B	B	A	B	A	A	A	A	B	B	B	B	B	A	A	B	A	B	B	A	A	A	B	A	B	A	B	A	A	A	A	B	A	B	B	A	B
Chr4_bin1251	3648987	A	B	B	A	A	A	B	A	A	B	A	B	B	A	B	A	A	A	A	B	B	B	B	B	A	A	B	A	B	B	A	A	A	B	A	B	A	B	A	A	A	A	B	A	B	B	A	B
Chr4_bin1252	3744120	A	B	B	A	A	A	B	A	A	B	A	B	B	A	B	A	A	A	A	B	B	B	B	B	A	A	B	A	B	B	A	A	A	B	A	B	A	B	A	A	A	A	B	A	B	B	A	B
Chr4_bin1253	3775487	A	B	B	A	A	A	B	A	A	B	A	B	B	A	B	A	A	A	A	B	B	B	B	B	A	A	B	A	B	B	B	A	A	B	A	B	A	B	A	A	A	A	B	A	B	B	A	B
Chr4_bin1254	3947169	A	B	B	A	A	A	B	A	A	B	A	B	B	A	B	A	A	A	A	B	B	B	B	B	A	A	B	A	B	B	B	A	A	B	A	B	A	B	A	A	A	A	B	A	B	B	A	B
Chr4_bin1255	4040834	A	B	B	A	A	A	B	A	A	B	A	B	B	A	B	A	A	A	A	B	B	B	B	B	A	A	B	A	B	B	B	A	A	B	A	B	A	B	A	A	A	A	B	A	B	B	A	B
Chr4_bin1256	4117969	A	B	B	A	B	A	B	A	A	B	A	B	B	A	B	A	A	A	A	B	B	B	B	B	A	A	B	A	B	A	B	A	A	B	A	B	A	B	A	A	A	A	B	A	B	B	A	B
Chr4_bin1257	4161498	A	B	B	A	B	A	B	A	A	B	A	B	B	A	B	A	A	A	A	B	B	B	B	B	A	A	B	A	B	A	B	A	A	B	A	B	A	B	A	A	A	A	B	A	B	B	A	B
Chr4_bin1258	4347306	A	B	B	A	B	A	B	A	A	B	A	B	B	A	B	A	A	A	A	B	B	B	B	B	A	A	B	A	B	A	B	A	A	B	A	B	A	B	A	A	A	A	B	A	B	B	A	B
Chr4_bin1259	4449389	A	B	B	A	B	A	B	A	A	B	A	B	B	A	B	A	A	A	A	B	B	B	B	B	A	A	B	A	B	A	B	A	A	B	A	B	A	B	A	A	A	A	B	A	B	B	A	B
Chr4_bin1260	4535266	A	B	B	A	B	A	B	A	A	B	A	B	B	A	B	A	A	A	A	B	B	B	B	B	A	A	B	A	B	A	B	A	A	B	A	B	A	B	A	A	A	A	B	A	B	B	A	B
Chr4_bin1261	4638529	A	B	B	A	B	A	B	A	A	B	A	B	B	A	B	A	A	A	A	B	B	B	B	B	A	A	B	A	B	A	B	A	A	B	A	B	A	B	A	A	A	A	B	A	B	B	A	B
Chr4_bin1262	4742069	A	B	B	A	B	A	B	A	A	B	A	B	B	A	B	B	B	A	A	B	B	B	B	B	A	A	B	A	B	A	B	A	A	B	A	B	A	B	A	A	A	A	B	A	B	B	B	B
Chr4_bin1263	4832309	A	B	B	A	B	A	B	A	A	B	A	B	B	A	B	B	B	A	A	B	B	B	B	B	A	A	B	A	B	A	B	A	A	B	A	B	A	B	A	A	A	A	B	A	B	B	B	B
Chr4_bin1264	4945128	A	B	B	A	B	A	B	A	A	B	A	B	B	A	B	B	B	A	A	B	B	B	B	B	A	A	B	A	B	A	B	A	A	B	A	B	A	B	A	A	A	A	B	A	B	B	B	B
Chr4_bin1265	5023041	A	B	B	A	B	A	B	A	A	B	A	B	B	A	B	B	B	A	A	B	B	B	B	B	B	A	B	A	B	A	B	A	A	B	A	B	A	B	A	A	A	A	B	A	B	B	B	A
Chr4_bin1266	5061432	A	B	B	A	B	A	B	A	A	B	A	B	B	A	B	B	B	A	A	B	B	B	B	B	B	A	B	A	B	A	B	A	A	B	A	B	A	B	A	A	A	A	B	A	B	B	B	A
Chr4_bin1267	5194830	A	B	B	A	B	A	B	A	A	B	A	B	B	A	B	A	A	A	A	B	B	B	B	B	B	A	B	A	B	A	B	A	A	B	A	B	A	B	A	A	A	A	B	A	B	B	B	A
Chr4_bin1268	5348676	A	B	B	A	B	A	B	A	A	B	A	B	B	A	B	A	A	A	A	B	B	B	B	B	B	A	B	A	B	A	B	A	A	B	A	B	A	B	A	A	A	A	B	A	B	B	B	A
Chr4_bin1269	5369501	A	B	B	A	B	A	B	A	A	B	A	B	B	A	B	A	A	A	A	B	B	B	B	B	B	A	B	A	B	A	B	A	A	B	A	B	A	B	A	A	A	A	B	A	B	B	B	A
Chr4_bin1270	5592210	A	B	B	A	B	A	B	A	A	B	A	B	B	A	B	A	A	A	A	B	B	B	B	B	B	A	B	A	B	A	B	A	A	B	A	B	A	B	A	A	A	A	B	A	B	B	B	A
Chr4_bin1271	6164469	A	B	B	A	B	A	B	A	A	B	A	B	B	A	B	A	A	A	A	B	B	B	B	B	B	A	B	A	B	A	B	A	A	B	A	B	A	B	A	A	A	A	B	A	B	B	B	A
Chr4_bin1272	6311726	A	B	B	A	B	A	B	A	A	B	A	B	B	A	B	A	A	A	A	B	B	B	B	B	B	A	B	A	B	A	B	A	A	B	A	B	A	B	A	A	A	A	B	A	B	B	B	A
Chr4_bin1273	6430708	A	B	B	A	B	A	B	A	A	B	A	B	B	A	B	A	A	A	A	B	B	B	B	B	B	A	B	A	B	A	B	A	A	B	A	B	A	B	A	A	A	A	B	A	B	B	B	A
Chr4_bin1274	6524461	A	B	B	A	B	A	B	A	A	B	A	B	B	A	B	B	B	A	A	B	A	B	B	B	B	A	B	A	B	A	B	A	A	A	A	B	A	B	A	A	A	A	B	A	B	B	B	A
Chr4_bin1275	6605566	A	B	B	A	B	A	B	A	A	B	A	B	B	A	B	B	B	A	A	B	A	B	B	B	B	A	B	A	B	A	B	A	A	A	A	B	A	B	A	A	A	A	B	A	B	B	B	A
Chr4_bin1276	6722058	A	B	B	A	B	B	B	A	A	B	A	B	B	A	B	B	B	A	A	B	A	B	B	B	B	A	B	A	B	A	B	A	A	A	A	B	A	B	A	A	A	A	B	A	B	B	B	A
Chr4_bin1277	6818221	A	B	B	A	B	B	B	A	A	B	A	B	B	A	B	B	B	A	A	B	A	B	B	B	B	A	B	A	B	A	B	A	A	A	A	B	A	B	A	A	A	A	B	A	B	B	B	A
Chr4_bin1278	6946782	A	B	B	A	B	B	B	A	A	B	A	B	B	A	B	B	B	A	A	B	A	B	B	B	B	A	B	A	B	A	B	A	A	A	A	B	A	B	A	A	A	A	B	A	B	B	B	A
Chr4_bin1279	7120550	A	B	B	A	B	B	B	A	A	B	A	B	B	A	B	B	B	A	A	B	A	B	B	B	B	A	B	A	B	A	B	A	A	A	A	B	A	B	A	A	A	A	B	A	B	B	B	A
Chr4_bin1280	7229594	A	B	B	A	B	B	B	A	A	B	A	B	B	A	B	B	B	A	A	B	A	B	B	B	B	A	B	A	B	A	B	A	A	A	A	B	A	B	A	A	A	A	B	A	B	B	B	A
Chr4_bin1281	7343479	A	B	B	A	B	B	B	A	A	B	A	B	B	A	B	B	B	A	A	B	A	B	B	B	B	A	B	A	B	A	B	A	A	A	A	B	A	B	A	A	A	A	B	A	B	B	B	A
Chr4_bin1282	7445287	A	B	B	A	B	B	B	A	A	B	A	B	B	A	B	B	B	A	A	B	A	B	B	B	B	A	B	A	B	A	B	A	A	A	A	B	A	B	A	A	A	A	B	A	B	B	B	A
Chr4_bin1283	7484173	A	B	B	A	B	B	B	A	A	B	A	B	B	A	B	B	B	A	A	B	A	B	B	B	B	A	B	A	B	A	B	A	A	A	A	B	A	B	A	A	A	A	B	A	B	B	B	A
Chr4_bin1284	7603540	A	B	B	A	B	B	B	A	A	B	A	B	B	A	B	B	B	A	A	B	A	B	B	B	B	A	B	A	B	A	B	A	A	A	A	B	A	B	A	A	A	A	B	A	B	B	B	A
Chr4_bin1285	7944864	A	B	B	A	B	B	B	A	A	B	A	B	B	A	B	B	B	A	A	B	A	B	B	B	B	A	B	A	B	A	B	A	B	A	A	B	A	B	A	A	A	A	B	A	B	B	B	A
Chr4_bin1286	8248048	A	B	B	A	B	B	B	A	A	B	A	B	B	A	B	B	B	A	A	B	A	B	B	B	B	A	B	A	B	A	B	A	B	A	A	B	A	B	A	A	A	A	B	A	B	B	B	A
Chr4_bin1287	8553667	A	B	B	A	B	B	B	A	A	B	A	B	B	A	B	B	B	A	A	B	A	B	B	B	B	A	B	A	B	A	B	A	B	A	A	B	A	B	A	A	A	A	B	A	B	B	B	A
Chr4_bin1288	9342885	A	B	B	A	B	B	B	A	A	B	A	B	B	A	B	B	B	A	A	B	A	B	B	B	B	A	B	A	B	A	B	A	B	A	A	B	A	B	A	A	A	B	B	A	B	B	B	A
Chr4_bin1289	9525007	A	B	B	A	B	B	B	A	A	B	A	B	B	A	B	B	B	A	A	B	A	A	B	B	B	A	B	A	B	A	B	A	B	A	A	B	A	B	A	A	A	B	B	A	B	B	B	A
Chr4_bin1290	9611350	A	B	B	A	B	B	B	A	A	B	A	B	B	A	B	B	B	A	A	B	A	A	B	B	B	A	B	A	B	A	B	A	B	A	A	B	A	B	A	A	A	B	B	A	B	B	B	A
Chr4_bin1291	9706181	A	B	B	A	B	B	B	A	A	B	A	B	B	A	B	B	B	A	A	B	A	A	B	B	B	A	B	A	B	A	B	A	B	A	A	B	A	B	A	A	A	B	B	A	B	B	B	A
Chr4_bin1292	9802630	A	B	B	A	B	B	B	A	A	B	A	B	B	A	B	B	B	A	A	B	A	A	B	B	A	A	B	A	B	A	B	A	B	A	A	B	A	B	A	A	A	B	B	A	B	B	B	A
Chr4_bin1293	10041207	A	B	B	A	B	B	B	A	A	B	A	B	B	A	B	B	B	A	A	B	A	A	B	B	A	A	B	A	B	A	B	A	B	A	A	B	A	B	A	A	A	B	B	A	B	B	B	A
Chr4_bin1294	10082459	A	B	B	A	B	B	B	A	A	B	A	B	B	A	B	B	B	A	A	B	A	A	B	B	A	A	B	A	B	A	B	A	B	A	A	B	A	B	A	A	A	B	B	A	B	B	B	A
Chr4_bin1295	10210525	A	B	B	A	B	B	B	A	A	B	A	B	B	A	B	B	B	A	A	B	A	A	B	B	A	A	B	A	B	A	B	A	B	A	A	B	A	B	A	A	A	B	B	A	B	B	B	A
Chr4_bin1296	10291024	A	B	B	A	B	B	B	A	A	B	A	B	B	A	B	B	B	A	A	B	A	A	B	B	A	A	B	A	B	A	B	A	B	A	A	B	A	B	A	A	A	B	B	A	B	B	B	A
Chr4_bin1297	10364044	A	B	B	B	B	B	B	A	A	B	A	B	B	A	B	B	B	A	A	B	A	A	B	B	A	A	B	A	B	A	B	A	B	A	A	B	A	B	A	A	A	B	B	A	B	B	B	A
Chr4_bin1298	10568323	A	B	B	B	B	B	B	A	A	B	A	B	B	A	B	B	B	A	A	B	A	A	B	B	A	A	B	A	B	A	B	A	B	A	A	B	A	B	B	A	A	B	B	A	B	B	B	A
Chr4_bin1299	11977782	A	B	B	B	B	B	B	A	A	B	A	B	B	A	B	B	B	A	A	B	A	A	B	B	A	A	B	A	B	A	B	A	B	A	A	B	A	B	B	A	A	B	B	A	B	B	B	A
Chr4_bin1300	12433992	A	B	B	B	B	B	B	A	A	B	A	B	B	A	B	B	B	A	A	B	A	A	B	B	A	A	B	A	B	A	B	A	B	A	A	B	A	B	B	A	A	B	B	A	B	B	B	A
Chr4_bin1301	13129850	A	B	B	B	B	B	B	A	A	B	A	B	B	A	B	B	B	A	A	B	A	A	B	B	A	A	B	A	B	A	B	A	B	A	A	B	A	B	B	A	A	B	B	A	B	B	B	A
Chr4_bin1302	13419161	A	B	B	B	B	B	B	A	A	B	A	B	B	A	B	B	B	A	A	B	A	A	B	B	A	A	B	A	B	A	B	A	B	A	A	B	A	B	B	A	A	B	B	A	B	B	B	A
Chr4_bin1303	13588996	A	B	B	B	B	B	B	A	A	B	A	B	B	A	B	B	B	A	A	B	A	A	B	B	A	A	B	A	B	A	B	A	B	A	A	B	A	B	B	A	A	B	B	A	B	B	B	A
Chr4_bin1304	13726868	A	B	B	B	B	B	B	A	A	B	A	B	B	A	B	B	B	A	A	B	A	A	B	B	A	A	B	A	B	A	B	A	B	A	A	B	A	B	B	A	A	B	B	A	B	B	B	A
Chr4_bin1305	14136473	A	B	B	B	B	B	B	A	A	B	A	B	B	A	B	B	B	A	A	B	A	A	B	B	A	A	B	A	B	A	B	A	B	A	A	B	A	B	B	A	A	B	B	A	B	B	B	A
Chr4_bin1306	14738650	A	B	B	B	B	B	B	A	A	B	A	B	B	A	B	B	B	A	A	B	A	A	B	B	A	A	B	A	B	A	B	A	B	A	A	B	A	B	B	A	A	B	B	A	B	B	B	A
Chr4_bin1307	14823825	A	B	B	B	B	B	B	A	A	B	A	B	B	A	B	B	B	A	A	B	A	A	B	B	A	A	B	A	B	A	B	A	B	A	A	B	A	B	B	A	A	B	B	A	B	B	B	A
Chr4_bin1308	16706921	A	B	B	B	B	B	B	A	A	B	A	B	B	A	B	B	B	A	A	B	A	A	B	B	A	A	B	A	B	A	B	A	B	A	A	B	A	B	B	A	A	B	B	A	B	B	B	A
Chr4_bin1309	19522340	A	B	B	B	B	B	B	A	A	B	A	B	B	A	B	B	B	A	A	B	A	A	B	B	A	A	B	A	B	A	B	A	B	A	A	B	A	B	B	A	A	B	B	A	B	B	B	A
Chr4_bin1310	19562728	A	B	B	B	B	B	B	A	A	B	A	B	B	A	B	B	B	A	A	B	A	A	B	B	A	A	B	A	B	A	B	A	B	A	A	B	A	B	B	A	A	B	B	A	B	B	B	A
Chr4_bin1311	20648186	A	B	B	B	B	B	B	A	A	B	A	B	B	A	B	B	B	A	A	B	A	A	B	B	A	A	B	A	B	A	B	A	B	A	A	B	A	B	B	A	A	B	B	A	B	B	B	A
Chr4_bin1312	24774844	A	B	B	B	B	B	B	A	A	B	A	B	B	A	B	B	B	A	A	B	A	A	B	B	A	A	B	A	B	A	B	A	B	A	A	B	A	B	B	A	A	B	B	A	B	B	B	A
Chr4_bin1313	28108233	A	B	B	B	B	B	B	A	A	B	A	B	B	A	B	B	B	A	A	B	A	A	B	B	A	A	B	A	B	A	B	A	B	A	A	B	A	B	B	A	A	B	B	A	B	B	B	A
Chr4_bin1314	28748849	A	B	B	B	B	B	B	A	A	B	A	B	B	A	B	B	B	A	A	B	A	A	B	B	A	A	B	A	B	A	B	A	B	A	A	B	A	B	B	A	A	B	B	A	B	B	B	A
Chr4_bin1315	30675088	A	B	B	B	B	B	B	A	A	B	A	B	B	A	B	B	B	A	A	B	A	A	B	B	A	A	B	A	B	A	B	A	B	A	A	B	A	B	B	A	A	B	B	A	B	B	B	A
Chr4_bin1316	33926366	A	B	B	B	B	B	B	A	A	B	A	B	B	A	B	B	B	A	A	B	A	A	B	B	A	A	B	A	B	A	B	A	B	A	A	B	A	B	B	A	A	B	B	A	B	B	B	A
Chr4_bin1317	35118381	A	B	B	B	B	B	B	A	A	B	A	B	B	A	B	B	B	A	A	B	A	A	B	B	A	A	B	A	B	A	B	A	B	A	A	B	A	B	B	A	A	B	B	A	B	B	B	A
Chr4_bin1318	36073653	A	B	B	B	B	B	B	A	A	B	A	B	B	A	B	B	B	A	A	B	A	A	B	B	A	A	B	A	B	A	B	A	B	A	A	B	A	B	B	A	A	B	B	A	B	B	B	A
Chr4_bin1319	36763512	A	B	B	B	B	B	B	A	A	B	A	B	B	A	B	B	B	A	A	B	A	A	B	B	A	A	B	A	B	A	B	A	B	A	A	B	A	B	B	A	A	B	B	A	B	B	B	A
Chr4_bin1320	37820738	A	B	B	B	B	B	B	A	A	B	A	B	B	A	B	B	B	A	A	B	A	A	B	B	A	A	B	A	B	A	B	A	B	A	A	B	A	B	B	A	A	B	B	A	B	B	B	A
Chr4_bin1321	37991580	A	B	B	B	B	B	B	A	A	B	A	B	B	A	B	B	B	A	A	B	A	A	B	B	A	A	B	A	B	A	B	A	B	A	A	B	A	B	B	A	A	B	B	A	B	B	B	A
Chr4_bin1322	39222798	A	B	B	B	B	B	B	A	A	B	A	B	B	A	B	B	B	A	A	B	A	A	B	B	A	A	B	A	B	A	B	A	B	A	A	B	A	B	B	A	A	B	B	A	B	B	B	A
Chr4_bin1323	39487678	A	B	B	B	B	B	B	A	A	B	A	B	B	A	B	B	B	A	A	B	A	A	B	B	A	A	B	A	B	A	B	A	B	A	A	B	A	B	B	A	A	B	B	A	B	B	B	A
Chr4_bin1324	39895511	A	B	B	B	B	B	B	A	A	B	A	B	B	A	B	B	B	A	A	B	A	A	B	B	A	A	B	A	B	A	B	A	B	A	A	B	A	B	B	A	A	B	B	A	B	B	B	A
Chr4_bin1325	40054116	A	B	B	B	B	B	B	A	A	B	A	B	B	A	B	B	B	A	A	B	A	A	B	B	A	A	B	A	B	A	B	A	B	A	A	B	A	B	B	A	A	B	B	A	B	B	B	A
Chr4_bin1326	40294070	A	B	B	B	B	B	B	A	A	B	A	B	B	A	B	B	B	A	A	B	A	A	B	B	A	A	B	A	B	A	B	A	B	A	A	B	A	B	B	A	A	B	B	A	B	B	B	A
Chr4_bin1327	40609128	A	B	B	B	B	B	B	A	A	B	A	B	B	A	B	B	B	A	A	B	A	A	B	B	A	A	B	A	B	A	B	A	B	A	A	B	A	B	B	A	A	B	B	A	B	B	B	A
Chr4_bin1328	41129492	A	B	B	B	B	B	B	A	A	B	A	B	B	A	B	B	B	A	A	B	A	A	B	B	A	A	B	A	B	A	B	A	B	A	A	B	A	B	B	A	A	B	B	A	B	B	B	A
Chr4_bin1329	41440756	A	B	B	B	B	B	B	A	A	B	A	B	B	A	B	B	B	A	A	B	A	A	B	B	A	A	B	A	B	A	B	A	B	A	A	B	A	B	B	A	A	B	B	A	B	B	B	A
Chr4_bin1330	43117492	A	B	B	B	B	B	B	A	A	B	A	B	B	A	B	B	B	A	A	B	A	A	B	B	A	A	B	A	B	A	B	A	B	A	A	B	A	B	B	A	A	B	B	A	B	B	B	A
Chr4_bin1331	43155668	A	B	B	B	B	B	B	A	A	B	A	B	B	A	B	B	B	A	A	B	A	A	B	B	A	A	B	A	B	A	B	A	B	A	A	B	A	B	B	A	A	B	B	A	B	B	B	A
Chr4_bin1332	44202302	A	B	B	B	B	B	B	A	A	B	A	B	B	A	B	B	B	A	A	B	A	A	B	B	A	A	B	A	B	A	B	A	B	A	A	B	A	B	B	A	A	B	B	A	B	B	B	A
Chr4_bin1333	45019626	A	B	B	B	B	B	B	A	A	B	A	B	B	A	B	B	B	A	A	B	A	A	B	B	A	A	B	A	B	A	B	A	B	A	A	B	A	B	B	A	A	B	B	A	B	B	B	A
Chr4_bin1334	45553579	A	B	B	B	B	B	B	A	A	B	A	B	B	A	B	B	B	A	A	B	A	A	B	B	A	A	B	A	B	A	B	A	B	A	A	B	A	B	B	A	A	B	B	A	B	B	B	A
Chr4_bin1335	45820889	A	B	B	B	B	B	B	A	A	B	A	B	B	A	B	B	B	A	A	B	A	A	B	B	A	A	B	A	B	A	B	A	B	A	A	B	A	B	B	A	A	B	B	A	B	B	B	A
Chr4_bin1336	46165526	A	B	B	B	B	B	B	A	A	B	A	B	B	A	B	B	B	A	A	B	A	A	B	B	A	A	B	A	B	A	B	A	B	A	A	B	A	B	B	A	A	B	B	A	B	B	B	A
Chr4_bin1337	46897104	A	B	B	B	B	B	B	A	A	B	A	B	B	A	B	B	B	A	A	B	A	A	B	B	A	A	B	A	B	A	B	A	B	A	A	B	A	B	B	A	A	B	B	A	B	B	B	A
Chr4_bin1338	47131310	A	B	B	B	B	B	B	A	A	B	A	B	B	A	B	B	B	A	A	B	A	A	B	B	A	A	B	A	B	A	B	A	B	A	A	B	A	B	B	A	A	B	B	A	B	B	B	A
Chr4_bin1339	48948299	A	B	B	B	B	B	B	A	A	B	A	B	B	A	B	B	B	A	A	B	A	A	B	B	A	A	B	A	B	A	B	A	B	A	A	B	A	B	B	A	A	B	B	A	B	B	B	A
Chr4_bin1340	49004071	A	B	B	B	B	B	B	A	A	B	A	B	B	A	B	B	B	A	A	B	A	A	B	B	A	A	B	A	B	A	B	A	B	A	A	B	A	B	B	A	A	B	B	A	B	B	B	A
Chr4_bin1341	49053800	A	B	B	B	B	B	B	A	A	B	A	B	B	A	B	B	B	A	A	B	A	A	B	B	A	A	B	A	B	A	B	A	B	A	A	B	A	B	B	A	A	B	B	A	B	B	B	A
Chr4_bin1342	51430237	A	B	B	B	B	B	B	A	A	B	A	B	B	A	B	B	B	A	A	B	A	A	B	B	A	A	B	A	B	A	B	A	B	A	A	B	A	B	B	A	A	B	B	A	B	B	B	A
Chr4_bin1343	51653349	A	B	B	B	B	B	B	A	A	B	A	B	B	A	B	B	B	A	A	B	A	A	B	B	A	A	B	A	B	A	B	A	B	A	A	B	A	B	B	A	A	B	B	A	B	B	B	A
Chr4_bin1344	52560900	A	B	B	B	B	B	B	A	A	B	A	B	B	A	B	B	B	A	A	B	A	A	B	B	A	A	B	A	B	A	B	A	B	A	A	B	A	B	B	A	A	B	B	A	B	B	B	A
Chr4_bin1345	53054005	A	B	B	B	B	B	B	A	A	B	A	B	B	A	B	B	B	A	A	B	A	A	B	B	A	A	B	A	B	A	B	A	B	A	A	B	A	B	B	A	A	B	B	A	B	B	B	A
Chr4_bin1346	53512798	A	B	B	B	B	B	B	A	A	B	A	B	B	A	B	B	B	A	A	B	A	A	B	B	A	A	B	A	B	A	B	A	B	A	A	B	A	B	B	A	A	B	B	A	B	B	B	A
Chr4_bin1347	54671102	A	B	B	B	B	B	B	A	A	B	A	B	B	A	B	B	B	A	A	B	A	A	B	B	A	A	B	A	B	A	B	A	B	A	A	B	A	B	B	A	A	B	B	A	B	B	B	A
Chr4_bin1348	54900119	A	B	B	B	B	B	B	A	A	B	A	B	B	A	B	B	B	A	A	B	A	A	B	B	A	A	B	A	B	A	B	A	B	A	A	B	A	B	B	A	A	B	B	A	B	B	B	A
Chr4_bin1349	55031552	A	B	B	B	B	B	B	A	A	B	A	B	B	A	B	B	B	A	A	B	A	A	B	B	A	A	B	A	B	A	B	A	B	A	A	B	A	B	B	A	A	B	B	A	B	B	B	A
Chr4_bin1350	55512957	A	B	B	B	B	B	B	A	A	B	A	B	B	A	B	B	B	A	A	B	A	A	B	B	A	A	B	A	B	A	B	A	B	A	A	B	A	B	B	A	A	B	B	A	B	B	B	A
Chr4_bin1351	56179756	A	B	B	B	B	B	B	A	A	B	A	B	B	A	B	B	B	A	A	B	A	A	B	B	A	A	B	A	B	A	B	A	B	A	A	B	A	B	B	A	A	B	B	A	B	B	B	A
Chr4_bin1352	57430431	A	B	B	B	B	B	B	A	A	B	A	B	B	A	B	B	B	A	A	B	A	A	B	B	A	A	B	A	B	A	B	A	B	A	A	B	A	B	B	A	A	B	B	A	B	B	B	A
Chr4_bin1353	59264715	A	B	B	B	B	B	B	A	A	B	A	B	B	A	B	B	B	A	A	B	A	A	B	B	A	A	B	A	B	A	B	A	B	A	A	B	A	B	B	A	A	B	B	A	B	B	B	A
Chr4_bin1354	59444580	A	B	B	B	B	B	B	A	A	B	A	B	B	A	B	B	B	A	A	B	A	A	B	B	A	A	B	A	B	A	B	A	B	A	A	B	A	B	B	A	A	B	B	A	B	B	B	A
Chr4_bin1355	59583021	A	B	B	B	B	B	B	A	A	B	A	B	B	A	B	B	B	A	A	B	A	A	B	B	A	A	B	A	B	A	B	A	B	A	A	B	A	B	B	A	A	B	B	A	B	B	B	A
Chr4_bin1356	59736431	A	B	B	B	B	B	B	A	A	B	A	B	B	A	B	B	B	A	A	B	A	A	B	B	A	A	B	A	B	A	B	A	B	A	A	B	A	B	B	A	A	B	B	A	B	B	B	A
Chr4_bin1357	60282095	A	B	B	B	B	B	B	A	A	B	A	B	B	A	B	B	B	A	A	B	A	A	B	B	A	A	B	A	B	A	B	A	B	A	A	B	A	B	B	A	A	B	B	A	B	B	B	A
Chr4_bin1358	60884639	A	B	B	B	B	B	B	A	A	B	A	B	B	A	B	B	B	A	A	B	A	A	B	B	A	A	B	A	B	A	B	A	B	A	A	B	A	B	B	A	A	B	B	A	B	B	B	A
Chr4_bin1359	61348646	A	B	B	B	B	B	B	A	A	B	A	B	B	A	B	B	B	A	A	B	A	A	B	B	A	A	B	A	B	A	B	A	B	A	A	B	A	B	B	A	A	B	B	A	B	B	B	A
Chr4_bin1360	62507841	A	B	B	B	B	B	B	A	A	B	A	B	B	A	B	B	B	A	A	B	A	A	B	B	A	A	B	A	B	A	B	A	B	A	A	B	A	B	B	A	A	B	B	A	B	B	B	A
Chr4_bin1361	63160072	A	B	B	B	B	B	B	A	A	B	A	B	B	A	B	B	B	A	A	B	A	A	B	B	A	A	B	A	B	A	B	A	B	A	A	B	A	B	B	A	A	B	B	A	B	B	B	A
Chr4_bin1362	63590298	A	B	B	B	B	B	B	A	A	B	A	B	B	A	B	B	B	A	A	B	A	A	B	B	A	A	B	A	B	A	B	A	B	A	A	B	A	B	B	A	A	B	B	A	B	B	B	A
Chr4_bin1363	63972510	A	B	B	B	B	B	B	A	A	B	A	B	B	A	B	B	B	A	A	B	A	A	B	B	A	A	B	A	B	A	B	A	B	A	A	B	A	B	B	A	A	B	B	A	B	B	B	A
Chr4_bin1364	64422988	A	B	B	B	B	B	B	A	A	B	A	B	B	A	B	B	B	A	A	B	A	A	B	B	A	A	B	A	B	A	B	A	B	A	A	B	A	B	B	A	A	B	B	A	B	B	B	A
Chr4_bin1365	64454135	A	B	B	B	B	B	B	A	A	B	A	B	B	A	B	B	B	A	A	B	A	A	B	B	A	A	B	A	B	A	B	A	B	A	A	B	A	B	B	A	A	B	B	A	B	B	B	A
Chr4_bin1366	64903411	A	B	B	B	B	B	B	A	A	B	A	B	B	A	B	B	B	A	A	B	A	A	B	B	A	A	B	A	B	A	B	A	B	A	A	B	A	B	B	A	A	B	B	A	B	B	B	A
Chr4_bin1367	65034036	A	B	B	B	B	B	B	A	A	B	A	B	B	A	B	B	B	A	A	B	A	A	B	B	A	A	B	A	B	A	B	A	B	A	A	B	A	B	B	A	A	B	B	A	B	B	B	A
Chr4_bin1368	65151011	A	B	B	B	B	B	B	A	A	B	A	B	B	A	B	B	B	A	A	B	A	A	B	B	A	A	B	A	B	A	B	A	B	A	A	B	A	B	B	A	A	B	B	A	B	B	B	A
Chr4_bin1369	66016995	A	B	B	B	B	B	B	A	A	B	A	B	B	A	B	B	B	A	A	B	A	A	B	B	A	A	B	A	B	A	B	A	B	A	A	B	A	B	B	A	A	B	B	A	B	B	B	A
Chr4_bin1370	66122927	A	B	B	B	B	B	B	A	A	B	A	B	B	A	B	B	B	A	A	B	A	A	B	B	A	A	B	A	B	A	B	A	B	A	A	B	A	B	B	A	A	B	B	A	B	B	B	A
Chr4_bin1371	67028014	A	B	B	B	B	B	B	A	A	B	A	B	B	A	B	B	B	A	A	B	A	A	B	B	A	A	B	A	B	A	B	A	B	A	A	B	A	B	B	A	A	B	B	A	B	B	B	A
Chr4_bin1372	67079577	A	B	B	B	B	B	B	A	A	B	A	B	B	A	B	B	B	A	A	B	A	A	B	B	A	A	B	A	B	A	B	A	B	A	A	B	A	B	B	A	A	B	B	A	B	B	B	A
Chr4_bin1373	67770007	A	B	B	B	B	B	B	A	A	B	A	B	B	A	B	B	B	A	A	B	A	A	B	B	A	A	B	A	B	A	B	A	B	A	A	B	A	B	B	A	A	B	B	A	B	B	B	A
Chr4_bin1374	68516881	A	B	B	B	B	B	B	A	A	B	A	B	B	A	B	B	B	A	A	B	A	A	B	B	A	A	B	A	B	A	B	A	B	A	A	B	A	B	B	A	A	B	B	A	B	B	B	A
Chr4_bin1375	68820581	A	B	B	B	B	B	B	A	A	B	A	B	B	A	B	B	B	A	A	B	A	A	B	B	A	A	B	A	B	A	B	A	B	A	A	B	A	B	B	A	A	B	B	A	B	B	B	A
Chr4_bin1376	69003867	A	B	B	B	B	B	B	A	A	B	A	B	B	A	B	B	B	A	A	B	A	A	B	B	A	A	B	A	B	A	B	A	B	A	A	B	A	B	B	A	A	B	B	A	B	B	B	A
Chr4_bin1377	69222189	A	B	B	B	B	B	B	A	A	B	A	B	B	A	B	B	B	A	A	B	A	A	B	B	A	A	B	A	B	A	B	A	B	A	A	B	A	B	B	A	A	B	B	A	B	B	B	A
Chr4_bin1378	69459827	A	B	B	B	B	B	B	A	A	B	A	B	B	A	B	B	B	A	A	B	A	A	B	B	A	A	B	A	B	A	B	A	B	A	A	B	A	B	B	A	A	B	B	A	B	B	B	A
Chr4_bin1379	70158180	A	B	B	B	B	B	B	A	A	B	A	B	B	A	B	B	B	A	A	B	A	A	B	B	A	A	B	A	B	A	B	A	B	A	A	B	A	B	B	A	A	B	B	A	B	B	B	A
Chr4_bin1380	71702719	A	B	B	B	B	B	B	A	A	B	A	B	B	A	B	B	B	A	A	B	A	A	B	B	A	A	B	A	B	A	B	A	B	A	A	B	A	B	B	A	A	B	B	A	B	B	B	A
Chr4_bin1381	72343559	A	B	B	B	B	B	B	A	A	B	A	B	B	A	B	B	B	A	A	B	A	A	B	B	A	A	B	A	B	A	B	A	B	A	A	B	A	B	B	A	A	B	B	A	B	B	B	A
Chr4_bin1382	72470800	A	B	B	B	B	B	B	A	A	B	A	B	B	A	B	B	B	A	A	B	A	A	B	B	A	A	B	A	B	A	B	A	B	A	A	B	A	B	B	A	A	B	B	A	B	B	B	A
Chr4_bin1383	72970612	A	B	B	B	B	B	B	A	A	B	A	B	B	A	B	B	B	A	A	B	A	A	B	B	A	A	B	A	B	A	B	A	B	A	A	B	A	B	B	A	A	B	B	A	B	B	B	A
Chr4_bin1384	73751594	A	B	B	B	B	B	B	A	A	B	A	B	B	A	B	B	B	A	A	B	A	A	B	B	A	A	B	A	B	A	B	A	B	A	A	B	A	B	B	A	A	B	B	A	B	B	B	A
Chr4_bin1385	74093812	A	B	B	B	B	B	B	A	A	B	A	B	B	A	B	B	B	A	A	B	A	A	B	B	A	A	B	A	B	A	B	A	B	A	A	B	A	B	B	A	A	B	B	A	B	B	B	A
Chr4_bin1386	75160725	A	B	B	B	B	B	B	A	A	B	A	B	B	A	B	B	B	A	A	B	A	A	B	B	A	A	B	A	B	A	B	A	B	A	A	B	A	B	B	A	A	B	B	A	B	B	B	A
Chr4_bin1387	75343703	A	B	B	B	B	B	B	A	A	B	A	B	B	A	B	B	B	A	A	B	A	A	B	B	A	A	B	A	B	A	B	A	B	A	A	B	A	B	B	A	A	B	B	A	B	B	B	A
Chr4_bin1388	75716788	A	B	B	B	B	B	B	A	A	B	A	B	B	A	B	B	B	A	A	B	A	A	B	B	A	A	B	A	B	A	B	A	B	A	A	B	A	B	B	A	A	B	B	A	B	B	B	A
Chr4_bin1389	76339481	A	B	B	B	B	B	B	A	A	B	A	B	B	A	B	B	B	A	A	B	A	A	B	B	A	A	B	A	B	A	B	A	B	A	A	B	A	B	B	A	A	B	B	A	B	B	B	A
Chr4_bin1390	77192947	A	B	B	B	B	B	B	A	A	B	A	B	B	A	B	B	B	A	A	B	A	A	B	B	A	A	B	A	B	A	B	A	B	A	A	B	A	B	B	A	A	B	B	A	B	B	B	A
Chr4_bin1391	77417858	A	B	B	B	B	B	B	A	A	B	A	B	B	A	B	B	B	A	A	B	A	A	B	B	A	A	B	A	B	A	B	A	B	A	A	B	A	B	B	A	A	B	B	A	B	B	B	A
Chr4_bin1392	78169829	A	B	B	B	B	B	B	A	A	B	A	B	B	A	B	B	B	A	A	B	A	A	B	B	A	A	B	A	B	A	B	A	B	A	A	B	A	B	B	A	A	B	B	A	B	B	B	A
Chr4_bin1393	78526600	A	B	B	B	B	B	B	A	A	B	A	B	B	A	B	B	B	A	A	B	A	A	B	B	A	A	B	A	B	A	B	A	B	A	A	B	A	B	B	A	A	B	B	A	B	B	B	A
Chr4_bin1394	80045958	A	B	B	B	B	B	B	A	A	B	A	B	B	A	B	B	B	A	A	B	A	A	B	B	A	A	B	A	B	A	B	A	B	A	A	B	A	B	B	A	A	B	B	A	B	B	B	A
Chr4_bin1395	80393858	A	B	B	B	B	B	B	A	A	B	A	B	B	A	B	B	B	A	A	B	A	A	B	B	A	A	B	A	B	A	B	A	B	A	A	B	A	B	B	A	A	B	B	A	B	B	B	A
Chr4_bin1396	81376711	A	B	B	B	B	B	B	A	A	B	A	B	B	A	B	B	B	A	A	B	A	A	B	B	A	A	B	A	B	A	B	A	B	A	A	B	A	B	B	A	A	B	B	A	B	B	B	A
Chr4_bin1397	81695273	A	B	B	B	B	B	B	A	A	B	A	B	B	A	B	B	B	A	A	B	A	A	B	B	A	A	B	A	B	A	B	A	B	A	A	B	A	B	B	A	A	B	B	A	B	B	B	A
Chr4_bin1398	82473400	A	B	B	B	B	B	B	A	A	B	A	B	B	A	B	B	B	A	A	B	A	A	B	B	A	A	B	A	B	A	B	A	B	A	A	B	A	B	B	A	A	B	B	A	B	B	B	A
Chr4_bin1399	82790330	A	B	B	B	B	B	B	A	A	B	A	B	B	A	B	B	B	A	A	B	A	A	B	B	A	A	B	A	B	A	B	A	B	A	A	B	A	B	B	A	A	B	B	A	B	B	B	A
Chr4_bin1400	83658074	A	B	B	B	B	B	B	A	A	B	A	B	B	A	B	B	B	A	A	B	A	A	B	B	A	A	B	A	B	A	B	A	B	A	A	B	A	B	B	A	A	B	B	A	B	B	B	A
Chr4_bin1401	84401666	A	B	B	B	B	B	B	A	A	B	A	B	B	A	B	B	B	A	A	B	A	A	B	B	A	A	B	A	B	A	B	A	B	A	A	B	A	B	B	A	A	B	B	A	B	B	B	A
Chr4_bin1402	84508384	A	B	B	B	B	B	B	A	A	B	A	B	B	A	B	B	B	A	A	B	A	A	B	B	A	A	B	A	B	A	B	A	B	A	A	B	A	B	B	A	A	B	B	A	B	B	B	A
Chr4_bin1403	84583534	A	B	B	B	B	B	B	A	A	B	A	B	B	A	B	B	B	A	A	B	A	A	B	B	A	A	B	A	B	A	B	A	B	A	A	B	A	B	B	A	A	B	B	A	B	B	B	A
Chr4_bin1404	85200246	A	B	B	B	B	B	B	A	A	B	A	B	B	A	B	B	B	A	A	B	A	A	B	B	A	A	B	A	B	A	B	A	B	A	A	B	A	B	B	A	A	B	B	A	B	B	B	A
Chr4_bin1405	85269872	A	B	B	B	B	B	B	A	A	B	A	B	B	A	B	B	B	A	A	B	A	A	B	B	A	A	B	A	B	A	B	A	B	A	A	B	A	B	B	A	A	B	B	A	B	B	B	A
Chr4_bin1406	85377455	A	B	B	B	B	B	B	A	A	B	A	B	B	A	B	B	B	A	A	B	A	A	B	B	A	A	B	A	B	A	B	A	B	A	A	B	A	B	B	A	A	B	B	A	B	B	B	A
Chr4_bin1407	85465048	A	B	B	B	B	B	B	A	A	B	A	B	B	A	B	B	B	A	A	B	A	A	B	B	A	A	B	A	B	A	B	A	B	A	A	B	A	B	B	A	A	B	B	A	B	B	B	A
Chr4_bin1408	85615971	A	B	B	B	B	B	B	A	A	B	A	B	B	A	B	B	B	A	A	B	A	A	B	B	A	A	B	A	B	A	B	A	B	A	A	B	A	B	B	A	A	B	B	A	B	B	B	A
Chr4_bin1409	86099020	A	B	B	B	B	B	B	A	A	B	A	B	B	A	B	B	B	A	A	B	A	A	B	B	A	A	B	A	B	A	B	A	B	A	A	B	A	B	B	A	A	B	B	A	B	B	B	A
Chr4_bin1410	86509784	A	B	B	B	B	B	B	A	A	B	A	B	B	A	B	B	B	A	A	B	A	A	B	B	A	A	B	A	B	A	B	A	B	A	A	B	A	B	B	A	A	B	B	A	B	B	B	A
Chr4_bin1411	86843495	A	B	B	B	B	B	B	A	A	B	A	B	B	A	B	B	B	A	A	B	A	A	B	B	A	A	B	A	B	A	B	A	B	A	A	B	A	B	B	A	A	B	B	A	B	B	B	A
Chr4_bin1412	87359966	A	B	B	B	B	B	B	A	A	B	A	B	B	A	B	B	B	A	A	B	A	A	B	B	A	A	B	A	B	A	B	A	B	A	A	B	A	B	B	A	A	B	B	A	B	B	B	A
Chr4_bin1413	87629583	A	B	B	B	B	B	B	A	A	B	A	B	B	A	B	B	B	A	A	B	A	A	B	B	A	A	B	A	B	A	B	A	B	A	A	B	A	B	B	A	A	B	B	A	B	B	B	A
Chr4_bin1414	87925233	A	B	B	B	B	B	B	A	A	B	A	B	B	A	B	B	B	A	A	B	A	A	B	B	A	A	B	A	B	A	B	A	B	A	A	B	A	B	B	A	A	B	B	A	B	B	B	A
Chr4_bin1415	88092999	A	B	B	B	B	B	B	A	A	B	A	B	B	A	B	B	B	A	A	B	A	A	B	B	A	A	B	A	B	A	B	A	B	A	A	B	A	B	B	A	A	B	B	A	B	B	B	A
Chr4_bin1416	88348308	A	B	B	B	B	B	B	A	A	B	A	B	B	A	B	B	B	A	A	B	A	A	B	B	A	A	B	A	B	A	B	A	B	A	A	B	A	B	B	A	A	B	B	A	B	B	B	A
Chr4_bin1417	88697077	A	B	B	B	B	B	B	A	A	B	A	B	B	A	B	B	B	A	A	B	A	A	B	B	A	A	B	A	B	A	B	A	B	A	A	B	A	B	B	A	A	B	B	A	B	B	B	A
Chr4_bin1418	89092970	A	B	B	B	B	B	B	A	A	B	A	B	B	A	B	B	B	A	A	B	A	A	B	B	A	A	B	A	B	A	B	A	B	A	A	B	A	B	B	A	A	B	B	A	B	B	B	A
Chr4_bin1419	89199165	A	B	B	B	B	B	B	A	A	B	A	B	B	A	B	B	B	A	A	B	A	A	B	B	A	A	B	A	B	A	B	A	B	A	A	B	A	B	B	A	A	B	B	A	B	B	B	A
Chr4_bin1420	89432193	A	B	B	B	B	B	B	A	A	B	A	B	B	A	B	B	B	A	A	B	A	A	B	B	A	A	B	A	B	A	B	A	B	A	A	B	A	B	B	A	A	B	B	A	B	B	B	A
Chr4_bin1421	90010347	A	B	B	B	B	B	B	A	A	B	A	B	B	A	B	B	B	A	A	B	A	A	B	B	A	A	B	A	B	A	B	A	B	A	A	B	A	B	B	A	A	B	B	A	B	B	B	A
Chr4_bin1422	90544941	A	B	B	B	B	B	B	A	A	B	A	B	B	A	B	B	B	A	A	B	A	A	B	B	A	A	B	A	B	A	B	A	B	A	A	B	A	B	B	A	A	B	B	A	B	B	B	A
Chr4_bin1423	91566382	A	B	B	B	B	B	B	A	A	B	A	B	B	A	B	B	B	A	A	B	A	A	B	B	A	A	B	A	B	A	B	A	B	A	A	B	A	B	B	A	A	B	B	A	B	B	B	A
Chr4_bin1424	91893553	A	B	B	B	B	B	B	A	A	B	A	B	B	A	B	B	B	A	A	B	A	A	B	B	A	A	B	A	B	A	B	A	B	A	A	B	A	B	B	A	A	B	B	A	B	B	B	A
Chr4_bin1425	92486731	A	B	B	B	B	B	B	A	A	B	A	B	B	A	B	B	B	A	A	B	A	A	B	B	A	A	B	A	B	A	B	A	B	A	A	B	A	B	B	A	A	B	B	A	B	B	B	A
Chr4_bin1426	92784012	A	B	B	B	B	B	B	A	A	B	A	B	B	A	B	B	B	A	A	B	A	A	B	B	A	A	B	A	B	A	B	A	B	A	A	B	A	B	B	A	A	B	B	A	B	B	B	A
Chr4_bin1427	93230149	A	B	B	B	B	B	B	A	A	B	A	B	B	A	B	B	B	A	A	B	A	A	B	B	A	A	B	A	B	A	B	A	B	A	A	B	A	B	B	A	A	B	B	A	B	B	B	A
Chr4_bin1428	93448709	A	B	B	B	B	B	B	A	A	B	A	B	B	A	B	B	B	A	A	B	A	A	B	B	A	A	B	A	B	A	B	A	B	A	A	B	A	B	B	A	A	B	B	A	B	B	B	A
Chr4_bin1429	93952856	A	B	B	B	B	B	B	A	A	B	A	B	B	A	B	B	B	A	A	B	A	A	B	B	A	A	B	A	B	A	B	A	B	A	A	B	A	B	B	A	A	B	B	A	B	B	B	A
Chr4_bin1430	94658487	A	B	B	B	B	B	B	A	A	B	A	B	B	A	B	B	B	A	A	B	A	A	B	B	A	A	B	A	B	A	B	A	B	A	A	B	A	B	B	A	A	B	B	A	B	B	B	A
Chr4_bin1431	95111876	A	B	B	B	B	B	B	A	A	B	A	B	B	A	B	B	B	A	A	B	A	A	B	B	A	A	B	A	B	A	B	A	B	A	A	B	A	B	B	A	A	B	B	A	B	B	B	A
Chr4_bin1432	95852764	A	B	B	B	B	B	B	A	A	B	A	B	B	A	B	B	B	A	A	B	A	A	B	B	A	A	B	A	B	A	B	A	B	A	A	B	A	B	B	A	A	B	B	A	B	B	B	A
Chr4_bin1433	96343464	A	B	B	B	B	B	B	A	A	B	A	B	B	A	B	B	B	A	A	B	A	A	B	B	A	A	B	A	B	A	B	A	B	A	A	B	A	B	B	A	A	B	B	A	B	B	B	A
Chr4_bin1434	96743723	A	B	B	B	B	B	B	A	A	B	A	B	B	A	B	B	B	A	A	B	A	A	B	B	A	A	B	A	B	A	B	A	B	A	A	B	A	B	B	A	A	B	B	A	B	B	B	A
Chr4_bin1435	96978673	A	B	B	B	B	B	B	A	A	B	A	B	B	A	B	B	B	A	A	B	A	A	B	B	A	A	B	A	B	A	B	A	B	A	A	B	A	B	B	A	A	B	B	A	B	B	B	A
Chr4_bin1436	97139449	A	B	B	B	B	B	B	A	A	B	A	B	B	A	B	B	B	A	A	B	A	A	B	B	A	A	B	A	B	A	B	A	B	A	A	B	A	B	B	A	A	B	B	A	B	B	B	A
Chr4_bin1437	97900892	A	B	B	B	B	B	B	A	A	B	A	B	B	A	B	B	B	A	A	B	A	A	B	B	A	A	B	A	B	A	B	A	B	A	A	B	A	B	B	A	A	B	B	A	B	B	B	A
Chr4_bin1438	98062625	A	B	B	B	B	B	B	A	A	B	A	B	B	A	B	B	B	A	A	B	A	A	B	B	A	A	B	A	B	A	B	A	B	A	A	B	A	B	B	A	A	B	B	A	B	B	B	A
Chr4_bin1439	98181343	A	B	B	B	B	B	B	A	A	B	A	B	B	A	B	B	B	A	A	B	A	A	B	B	A	A	B	A	B	A	B	A	B	A	A	B	A	B	B	A	A	B	B	A	B	B	B	A
Chr4_bin1440	98622455	A	B	B	B	B	B	B	A	A	B	A	B	B	A	B	B	B	A	A	B	A	A	B	B	A	A	B	A	B	A	B	A	B	A	A	B	A	B	B	A	A	B	B	A	B	B	B	A
Chr4_bin1441	99056825	A	B	B	B	B	B	B	A	A	B	A	B	B	A	B	B	B	A	A	B	A	A	B	B	A	A	B	A	B	A	B	A	B	A	A	B	A	B	B	A	A	B	B	A	B	B	B	A
Chr4_bin1442	99601029	A	B	B	B	B	B	B	A	A	B	A	B	B	A	B	B	B	A	A	B	A	A	B	B	A	A	B	A	B	A	B	A	B	A	A	B	A	B	B	A	A	B	B	A	B	A	B	A
Chr4_bin1443	99753305	A	B	B	B	B	B	B	A	A	B	A	B	B	A	B	B	B	A	A	B	A	A	B	B	A	A	B	A	B	A	B	A	B	A	A	B	A	B	B	A	A	B	B	A	B	A	B	A
Chr4_bin1444	100382542	A	B	B	B	B	B	B	A	A	B	A	B	B	A	B	B	B	A	A	B	A	A	B	B	A	A	B	A	B	A	B	A	B	A	A	B	A	B	B	A	A	B	B	A	B	A	B	A
Chr4_bin1445	100737389	A	B	B	B	B	B	B	A	A	B	A	B	B	A	B	B	B	A	A	B	A	A	B	B	A	A	B	A	B	A	B	A	B	A	A	B	A	B	B	A	A	B	B	A	B	A	B	A
Chr4_bin1446	101347278	A	B	B	B	B	B	B	A	A	B	A	B	B	A	B	B	B	A	A	B	A	A	B	B	A	A	B	A	B	A	B	A	B	A	A	B	A	B	B	A	A	B	B	A	B	A	B	A
Chr4_bin1447	101930117	A	B	B	B	B	B	B	A	A	B	A	B	B	A	B	B	B	A	A	B	A	A	B	B	A	A	B	A	B	A	B	A	B	A	A	B	A	B	B	A	A	B	B	A	B	A	B	A
Chr4_bin1448	102476938	A	B	B	B	B	B	B	A	A	B	A	B	B	A	B	B	B	A	A	B	A	A	B	B	A	A	B	A	B	A	B	A	B	A	A	B	A	B	B	A	A	B	B	A	B	A	B	A
Chr4_bin1449	102707167	A	B	B	B	B	B	B	A	A	B	A	B	B	A	B	B	B	A	A	B	A	A	B	B	A	A	B	A	B	A	B	A	B	A	A	B	A	B	B	A	A	B	B	A	B	A	B	A
Chr4_bin1450	102819979	A	B	B	B	B	B	B	A	A	B	A	B	B	A	B	B	B	A	A	B	A	A	B	B	A	A	B	A	B	A	B	A	B	A	A	B	A	B	B	A	A	B	B	A	B	A	B	A
Chr4_bin1451	102993009	A	B	B	B	B	B	B	A	A	B	A	B	B	A	B	B	B	A	A	B	A	A	B	B	A	A	B	A	B	A	B	A	B	A	A	B	A	B	B	A	A	B	B	A	B	A	B	A
Chr4_bin1452	103098637	A	B	B	B	B	B	B	A	A	B	A	B	B	A	B	B	B	A	A	B	A	A	B	B	A	A	B	A	B	A	B	A	B	A	A	B	A	B	B	A	A	B	B	A	B	A	B	A
Chr4_bin1453	103989801	A	B	B	B	B	B	B	A	A	B	A	B	B	A	B	B	B	A	A	B	A	A	B	B	A	A	B	A	B	A	B	A	B	A	A	B	A	B	B	A	A	B	B	A	B	A	B	A
Chr4_bin1454	104055584	A	B	B	B	B	B	B	A	A	B	A	B	B	A	B	B	B	A	A	B	A	A	B	B	A	A	B	A	B	A	B	A	B	A	A	B	A	B	B	A	A	B	B	A	B	A	B	A
Chr4_bin1455	104554942	A	B	B	B	B	B	B	A	A	B	A	B	B	A	B	B	B	A	A	B	A	A	B	B	A	A	B	A	B	A	B	A	B	A	A	B	A	B	B	A	A	B	B	A	B	A	B	A
Chr4_bin1456	104831482	A	B	B	B	B	B	B	A	A	B	A	B	B	A	B	B	B	A	A	B	A	A	B	B	A	A	B	A	B	A	B	A	B	A	A	B	A	B	B	A	A	B	B	A	B	A	B	A
Chr4_bin1457	104957267	A	B	B	B	B	B	B	A	A	B	A	B	B	A	B	B	B	A	A	B	A	A	B	B	A	A	B	A	B	A	B	A	B	A	A	B	A	B	B	A	A	B	B	A	B	A	B	A
Chr4_bin1458	105244860	A	B	B	B	B	B	B	A	A	B	A	B	B	A	B	B	B	A	A	B	A	A	B	B	A	A	B	A	B	A	A	A	B	A	A	B	A	B	B	A	A	B	B	A	B	A	B	A
Chr4_bin1459	105278587	A	B	B	B	B	B	B	A	A	B	A	B	B	A	B	B	B	A	A	B	A	A	B	B	A	A	B	A	B	A	A	A	B	A	A	B	A	H	B	A	A	B	B	A	B	A	B	A
Chr4_bin1460	105384057	A	B	B	B	B	B	B	A	A	B	A	B	B	A	B	B	B	A	A	B	A	A	B	B	A	A	B	A	B	A	A	A	B	A	A	B	A	H	B	A	A	B	B	A	B	A	B	A
Chr4_bin1461	105805556	A	B	B	B	B	B	B	A	A	B	A	B	B	A	B	B	B	A	A	B	A	A	B	B	A	A	B	A	B	A	A	A	B	A	A	B	A	H	B	A	A	B	B	A	B	A	B	A
Chr4_bin1462	105890215	A	B	B	B	B	B	B	A	A	B	A	B	B	A	B	B	B	A	A	B	A	A	B	B	A	A	B	A	B	A	A	A	B	A	A	B	A	H	B	A	A	B	B	A	B	A	B	A
Chr4_bin1463	106302346	A	B	B	B	B	B	B	A	A	B	A	B	B	A	B	B	B	A	A	B	A	A	B	B	A	A	B	A	B	A	A	A	B	A	A	B	A	H	B	A	A	B	B	A	B	A	B	A
Chr4_bin1464	106402008	A	B	B	B	B	B	B	A	A	B	A	B	B	A	B	B	B	A	A	B	A	A	B	B	B	A	B	A	B	A	A	A	B	A	A	B	A	H	B	A	A	B	B	A	B	A	B	A
Chr4_bin1465	106531280	A	B	B	B	B	B	B	A	A	B	A	B	B	A	B	B	B	A	A	B	A	A	B	B	B	A	B	A	B	A	A	A	B	A	A	B	A	H	B	A	A	B	B	A	B	A	B	A
Chr4_bin1466	106648983	A	B	B	B	B	B	B	A	A	B	A	B	B	A	B	B	B	A	A	B	A	A	B	B	B	A	B	A	B	A	A	A	B	A	A	B	A	H	B	A	A	B	B	A	B	A	B	A
Chr4_bin1467	106656624	A	B	B	B	B	A	B	A	A	B	A	A	B	A	B	B	B	A	A	B	A	A	A	B	B	A	B	A	B	A	A	A	B	A	A	B	A	H	B	A	A	B	B	A	A	A	A	A
Chr4_bin1468	106791186	A	B	B	B	B	A	B	A	A	B	A	A	B	A	B	B	B	A	A	B	A	A	A	B	B	A	B	A	B	A	A	A	B	A	A	B	A	H	B	A	A	B	B	A	A	A	A	A
Chr4_bin1469	106935296	A	B	B	B	B	A	B	A	A	B	A	A	B	A	B	B	B	A	A	B	A	A	A	B	B	B	B	A	B	A	A	A	B	A	A	B	A	H	B	A	A	B	B	A	A	A	A	A
Chr4_bin1470	107147053	A	B	B	B	B	A	B	A	A	B	A	A	B	A	B	A	A	A	A	B	A	A	A	B	B	B	B	A	A	A	A	A	B	A	A	B	A	H	B	A	A	B	B	A	A	A	A	A
Chr4_bin1471	107150258	A	A	B	B	B	A	B	A	A	B	A	A	B	A	B	A	A	A	A	B	A	A	A	B	B	B	B	A	A	A	A	A	B	A	A	B	A	H	A	A	A	B	B	A	A	A	A	A
Chr4_bin1472	107287056	A	A	B	B	B	A	B	A	A	B	A	A	B	A	B	A	A	A	A	B	A	A	A	B	B	B	B	A	A	A	A	A	B	A	A	B	A	H	A	A	A	B	B	A	A	A	A	A
Chr4_bin1473	107373722	A	A	B	B	B	A	B	A	A	B	A	A	B	A	B	A	A	A	A	B	A	A	A	B	B	B	B	A	A	A	A	A	B	A	A	B	A	H	A	A	A	B	B	A	A	A	A	A
Chr4_bin1474	107477468	A	A	B	B	B	A	B	A	A	B	A	A	B	A	B	A	A	A	A	B	A	A	A	B	B	B	B	A	A	A	A	A	B	A	A	B	A	H	A	A	A	B	B	A	A	A	A	A
Chr4_bin1475	107649473	A	A	B	B	B	A	B	A	A	B	A	A	B	A	B	A	A	A	A	B	A	A	A	B	B	B	B	A	A	A	A	A	B	A	A	B	A	H	A	A	A	B	B	A	A	A	A	A
Chr4_bin1476	107729024	A	B	B	B	B	B	B	A	A	B	A	B	B	A	B	B	B	A	A	B	A	A	A	B	A	B	B	A	B	A	A	A	B	A	A	B	A	H	A	A	A	B	B	A	A	A	B	A
Chr4_bin1477	107798352	A	B	B	B	B	B	B	A	A	B	A	B	B	A	B	B	B	A	A	B	A	A	B	B	A	A	B	A	B	A	A	A	B	A	A	B	A	H	A	A	A	B	B	A	B	A	B	A
Chr4_bin1478	108137415	A	B	B	B	B	B	B	A	A	B	A	B	B	A	B	B	B	A	A	B	A	A	B	B	A	A	B	A	B	A	A	A	B	A	A	B	A	H	B	A	A	B	B	A	B	A	B	A
Chr4_bin1479	108203248	A	B	B	B	B	B	B	A	A	B	A	B	B	A	B	B	B	A	A	B	A	A	B	B	A	A	B	A	B	A	A	A	B	A	A	B	A	H	B	A	A	B	B	A	B	A	B	A
Chr4_bin1480	108318247	A	B	B	B	B	B	B	A	A	B	A	B	B	A	B	B	B	A	A	B	A	A	B	B	A	A	B	A	B	A	A	A	B	A	A	B	A	H	B	A	A	B	B	A	B	A	B	A
Chr4_bin1481	108586573	A	B	B	B	B	B	B	A	A	B	A	B	B	A	B	B	B	A	A	B	A	A	B	B	A	A	B	A	B	A	A	A	B	A	A	B	A	H	B	A	A	B	B	A	B	A	B	A
Chr4_bin1482	108709220	A	B	B	B	B	B	B	A	A	B	A	B	B	A	B	B	B	A	A	B	A	A	B	B	A	A	B	A	B	A	A	A	B	A	A	B	A	H	B	A	A	B	B	A	B	A	B	A
Chr4_bin1483	109105380	A	B	B	B	B	B	B	A	A	B	A	B	B	A	B	B	B	A	A	B	A	A	B	B	A	A	B	A	B	A	A	A	B	A	A	B	A	H	B	A	A	B	B	A	B	A	B	A
Chr4_bin1484	109178142	A	B	B	B	B	B	B	A	A	B	A	B	B	A	B	B	B	A	A	B	A	A	B	B	A	A	B	A	B	A	A	A	B	A	A	B	A	H	B	A	A	B	B	A	B	A	B	A
Chr4_bin1485	109381353	A	B	B	B	B	B	B	A	A	B	A	B	B	A	B	B	B	A	A	B	A	A	B	B	A	A	B	A	B	A	A	A	B	B	A	B	A	H	B	A	A	B	B	A	B	A	B	A
Chr4_bin1486	109554582	A	B	B	B	B	B	B	A	A	B	A	B	B	A	B	B	B	A	A	B	A	A	B	B	A	A	B	A	B	A	A	A	B	B	A	B	A	H	B	A	A	B	B	A	B	A	B	A
Chr4_bin1487	109943733	A	B	B	B	B	B	B	A	A	A	A	B	B	A	B	B	B	A	A	B	A	A	B	B	A	A	B	A	B	A	A	A	B	B	A	B	A	H	B	A	A	B	B	A	B	A	B	A
Chr4_bin1488	110093087	A	B	B	B	B	B	B	A	A	A	A	B	B	A	B	B	B	B	A	B	A	A	B	B	A	A	B	A	B	A	A	A	B	B	A	B	A	H	B	A	A	B	B	A	B	A	B	A
Chr4_bin1489	110268103	A	B	B	B	B	B	B	A	A	A	A	B	B	A	B	B	B	B	A	B	A	A	B	B	A	A	B	A	B	A	A	A	B	B	A	B	A	A	B	A	A	B	B	A	B	A	B	A
Chr4_bin1490	110379611	A	B	B	B	B	B	B	A	A	A	A	B	B	A	B	B	B	B	A	B	A	A	B	B	A	A	B	A	B	A	A	A	B	B	A	B	A	A	B	A	A	B	B	A	B	A	B	A
Chr4_bin1491	110524991	A	B	B	B	B	B	B	A	A	A	A	B	B	A	B	B	B	B	A	B	A	A	B	B	A	A	B	A	B	A	A	A	B	B	A	B	A	A	B	A	A	B	B	A	B	A	B	A
Chr4_bin1492	111202087	A	B	B	B	B	B	B	A	A	A	A	B	B	A	B	B	B	B	A	B	A	A	B	B	A	A	B	A	B	A	A	A	B	B	A	B	A	A	B	A	A	B	B	A	B	A	B	A
Chr4_bin1493	112035512	A	B	B	B	B	B	B	A	A	A	A	B	B	A	B	B	B	B	A	B	A	A	B	B	A	A	B	A	B	A	A	A	B	B	A	B	A	A	B	A	A	B	B	A	B	A	B	A
Chr4_bin1494	112140836	A	B	B	B	B	B	B	A	A	A	A	B	B	A	B	B	B	B	A	B	A	A	B	B	A	A	B	A	B	A	A	A	B	B	A	B	A	A	B	A	A	B	B	A	B	A	B	A
Chr4_bin1495	112212660	A	B	B	B	B	B	B	A	A	A	A	B	B	A	B	B	B	B	A	B	A	A	B	B	A	A	B	A	B	A	A	A	B	B	A	B	A	A	B	B	A	B	B	A	B	A	B	A
Chr4_bin1496	112606063	A	B	B	B	B	B	B	A	A	A	A	B	B	A	B	B	B	B	A	B	A	A	B	B	A	A	B	A	B	A	A	A	B	B	A	B	A	A	B	B	A	B	B	A	B	A	B	A
Chr4_bin1497	112907266	A	B	B	B	B	B	B	A	A	A	A	B	B	A	B	B	B	B	A	B	A	A	B	B	A	A	B	A	B	A	A	A	B	B	A	B	A	A	B	B	A	B	B	A	B	A	B	A
Chr4_bin1498	113108074	A	B	B	B	B	B	B	A	A	A	A	B	B	A	B	B	B	B	A	B	A	A	B	B	A	A	B	A	B	A	B	A	B	B	A	B	A	A	B	B	A	B	B	A	B	A	B	A
Chr4_bin1499	113195345	A	B	B	B	B	B	B	A	A	A	A	B	B	A	B	B	B	B	A	B	A	A	B	B	A	A	B	A	B	A	B	A	B	B	A	B	A	A	B	B	A	B	B	A	B	A	B	A
Chr4_bin1500	113405213	A	B	B	B	B	B	B	A	A	A	A	B	B	A	B	B	B	B	A	B	A	A	B	B	A	A	B	A	B	A	B	A	B	B	A	B	A	A	B	B	A	B	B	A	B	A	B	A
Chr4_bin1501	113485850	A	B	B	B	B	B	B	A	A	A	A	B	B	B	B	B	B	B	A	B	A	A	A	B	A	A	B	B	B	A	B	A	B	B	A	B	A	A	B	B	A	B	B	A	B	A	B	A
Chr4_bin1502	113697356	A	B	B	B	B	B	B	A	A	A	A	B	B	B	B	B	B	B	A	B	A	A	A	B	A	A	B	B	B	A	B	A	B	B	A	B	A	A	B	B	A	B	B	A	B	A	B	A
Chr4_bin1503	113792478	A	B	B	B	B	B	B	A	A	A	A	B	B	B	B	B	B	B	A	B	A	A	A	B	A	A	B	B	B	A	B	A	B	B	A	B	A	A	B	B	A	B	B	A	B	A	B	A
Chr4_bin1504	114081832	A	B	B	B	B	B	B	A	A	A	A	B	B	B	B	B	B	B	A	B	B	A	A	B	A	A	B	B	B	A	B	A	B	B	A	B	A	A	B	B	A	B	B	A	B	A	B	A
Chr4_bin1505	114195189	A	B	B	B	B	B	B	A	A	A	A	B	B	B	B	B	B	B	A	B	B	A	A	B	A	A	B	B	B	A	B	B	B	B	A	B	A	A	B	B	A	B	B	A	B	A	B	A
Chr4_bin1506	114278977	A	B	B	B	B	B	B	A	A	A	A	B	B	B	B	B	B	B	A	B	B	B	A	B	A	A	B	B	B	A	B	B	B	B	A	B	A	A	B	B	A	B	B	A	B	A	B	A
Chr4_bin1507	114525348	A	B	B	B	B	B	B	A	A	A	A	B	B	B	B	B	B	B	A	B	B	B	A	B	A	A	B	B	B	A	B	B	B	B	A	B	A	A	B	B	A	B	B	A	B	A	B	A
Chr4_bin1508	114645405	A	B	B	B	B	B	B	A	A	A	A	B	B	B	B	B	B	B	A	B	B	B	A	B	A	A	B	B	B	A	B	B	B	B	A	B	A	A	B	B	A	B	B	A	B	A	B	A
Chr4_bin1509	114685103	A	B	B	B	B	B	B	A	B	A	A	B	B	B	B	B	B	B	A	B	B	B	A	B	A	A	B	B	B	A	B	B	B	B	A	B	A	A	B	B	A	B	B	A	B	A	B	A
Chr4_bin1510	114981616	A	B	B	B	B	B	B	A	B	A	A	B	B	B	B	B	B	B	A	B	B	B	A	B	A	A	B	B	B	A	B	B	B	B	A	B	A	A	B	B	A	B	B	A	B	A	B	A
Chr4_bin1511	115128619	A	B	B	B	B	B	B	A	B	A	A	B	B	B	B	B	B	B	A	B	B	B	A	B	A	A	B	B	B	A	B	B	B	B	A	B	A	A	B	B	A	B	B	A	B	A	B	A
Chr4_bin1512	115293164	A	B	B	B	B	B	B	A	B	A	A	B	B	B	B	B	B	B	A	B	B	B	A	B	A	A	B	B	B	A	B	B	B	B	A	B	A	A	B	B	A	B	B	A	B	A	B	A
Chr4_bin1513	115431833	A	B	B	B	B	B	B	A	B	A	A	B	B	B	B	B	B	B	A	B	B	B	A	B	B	A	B	B	B	A	B	B	B	B	A	B	A	A	B	B	A	B	B	A	B	A	B	A
Chr4_bin1514	115518102	A	B	B	B	B	B	B	A	B	A	A	B	B	B	B	B	B	B	A	B	B	B	A	B	B	A	B	B	B	A	B	B	B	B	A	B	A	A	B	B	A	B	B	A	B	A	B	A
Chr4_bin1515	115894260	A	B	B	B	B	B	B	A	B	A	A	B	B	B	B	B	B	B	A	B	B	B	A	B	B	A	B	B	B	A	B	B	B	B	A	B	B	A	B	B	A	B	B	A	B	A	B	A
Chr4_bin1516	116215737	A	B	B	B	B	B	B	A	B	A	A	B	B	B	B	B	B	B	A	B	B	B	A	B	B	A	B	B	B	A	B	B	B	B	A	B	B	A	B	B	A	B	B	B	B	A	B	A
Chr4_bin1517	116392210	A	B	B	B	B	B	B	A	B	A	A	B	B	B	B	B	B	B	A	B	B	B	A	B	B	A	B	B	B	A	B	B	B	B	A	B	B	A	B	B	A	B	B	B	B	A	B	A
Chr4_bin1518	116821879	A	B	B	B	B	B	B	A	B	A	A	B	B	B	B	B	B	B	A	B	B	B	A	B	B	A	B	B	B	A	B	B	B	B	A	B	B	A	B	B	A	B	B	B	B	A	B	A
Chr4_bin1519	117123285	A	B	B	B	B	B	B	A	B	A	A	B	B	B	B	B	B	B	A	B	B	B	A	B	B	A	B	B	B	A	B	B	B	B	A	B	B	A	B	B	A	B	B	B	B	A	B	A
Chr4_bin1520	117430290	A	B	B	B	B	B	B	A	B	B	A	B	B	B	B	B	B	B	A	B	B	B	A	B	B	A	B	B	B	A	B	B	B	B	A	B	B	A	B	B	A	B	B	B	B	A	B	A
Chr4_bin1521	117727957	A	B	B	B	B	B	B	A	B	B	A	B	B	B	B	B	B	B	A	B	B	B	A	B	B	A	B	B	B	A	B	B	B	B	A	B	B	A	B	B	A	B	B	B	B	A	B	A
Chr4_bin1522	117919448	A	B	B	B	B	B	B	A	B	B	A	B	B	B	B	B	B	B	A	B	B	B	A	B	B	A	B	B	B	A	B	B	B	B	A	B	B	A	B	B	A	B	B	B	B	A	B	A
Chr4_bin1523	118021279	A	B	B	B	B	B	B	A	B	B	A	B	B	B	B	B	B	B	A	B	B	B	A	B	B	A	B	B	B	A	B	B	B	B	A	B	B	A	B	B	A	B	B	B	B	A	B	A
Chr4_bin1524	118127293	A	B	B	B	B	B	B	A	B	B	A	B	B	B	B	B	B	B	A	B	B	B	A	B	B	A	B	B	B	A	B	B	B	B	A	B	B	A	B	B	A	B	B	B	B	A	B	A
Chr4_bin1525	118187625	A	B	B	B	B	B	B	A	B	B	A	B	B	B	B	B	B	B	A	B	B	B	A	B	B	A	B	B	B	A	B	B	B	B	A	B	B	A	B	B	A	B	B	B	B	A	B	A
Chr4_bin1526	118428384	A	B	B	B	B	B	B	A	B	B	A	B	B	B	B	B	B	B	A	B	B	B	A	B	B	A	B	B	B	A	B	B	B	B	A	B	B	A	B	B	A	B	B	B	B	A	B	A
Chr4_bin1527	118495825	A	B	B	B	B	B	B	A	B	B	A	B	B	B	B	B	B	B	A	B	B	B	A	B	B	A	B	B	B	A	B	B	B	B	A	B	B	A	B	B	A	B	B	B	B	A	B	A
Chr4_bin1528	118588497	A	B	B	B	B	B	B	A	B	B	A	B	B	B	B	B	B	B	A	B	B	B	A	B	B	A	B	B	B	A	B	B	B	B	A	B	B	A	B	B	A	B	B	B	B	A	B	B
Chr4_bin1529	118811547	A	B	B	B	B	B	B	A	B	B	A	B	B	A	B	B	B	B	A	B	B	B	A	B	B	A	B	B	B	A	B	B	B	B	A	B	B	A	B	B	A	B	B	B	B	A	B	B
Chr4_bin1530	118949142	A	B	B	B	B	B	B	A	B	B	A	B	B	A	B	B	B	B	A	B	B	B	B	B	B	A	B	B	B	A	B	B	B	B	A	B	B	A	B	B	A	B	B	B	B	A	B	B
Chr4_bin1531	119041449	A	B	B	B	B	B	B	A	B	B	A	B	B	A	B	B	B	B	A	B	B	B	B	B	A	A	B	B	B	A	B	B	B	B	A	B	B	A	B	B	A	B	B	B	B	A	B	B
Chr4_bin1532	119084904	A	B	B	B	B	B	B	A	B	B	A	B	B	A	B	B	B	B	A	B	B	B	B	B	A	A	B	B	B	A	B	B	B	B	A	B	B	A	B	B	A	B	B	B	B	A	B	B
Chr4_bin1533	119247705	A	B	B	B	B	B	B	A	B	B	A	B	B	A	B	B	B	B	A	B	B	B	B	B	A	A	B	B	B	A	B	B	B	B	A	B	B	A	B	B	A	B	B	B	B	A	B	B
Chr4_bin1534	119307953	A	B	B	B	B	B	B	A	B	B	A	B	B	A	B	B	B	B	A	B	B	B	B	B	A	A	B	B	B	A	B	B	B	B	A	B	B	A	B	B	A	B	B	B	B	A	B	B
Chr4_bin1535	119591705	A	B	B	B	B	B	B	A	B	B	A	B	B	A	B	B	B	B	A	B	B	B	B	B	A	A	B	B	B	A	B	B	B	B	A	B	B	A	B	B	A	B	B	B	B	A	B	B
Chr4_bin1536	120200845	A	B	B	B	B	B	B	A	B	B	A	B	B	A	B	B	B	B	A	B	B	B	B	B	A	A	B	B	B	A	B	B	B	B	A	B	B	A	B	B	A	B	B	B	B	A	B	B
Chr4_bin1537	120363864	A	B	B	B	B	B	B	A	B	B	A	B	B	A	B	B	B	B	A	B	B	B	B	B	A	A	B	B	B	A	B	B	B	B	A	B	B	A	B	B	A	B	B	B	B	A	B	B
Chr4_bin1538	120499085	A	B	B	B	B	B	B	A	B	B	A	B	B	A	B	B	B	B	A	B	B	B	B	B	A	A	B	B	B	A	B	B	B	B	A	B	B	A	B	B	A	B	B	B	B	A	B	B
Chr4_bin1539	120587833	A	B	B	B	B	B	B	A	B	B	A	B	B	A	B	B	B	B	A	B	B	B	B	B	A	A	B	B	B	A	B	B	B	B	A	B	B	A	B	B	A	B	B	B	B	A	B	B
Chr4_bin1540	120680315	A	B	B	B	B	B	B	A	B	B	A	B	B	A	B	B	B	B	A	B	B	B	B	B	A	A	B	B	B	A	B	B	B	B	A	B	B	A	B	B	A	B	B	B	B	A	B	B
Chr4_bin1541	120841997	A	B	B	B	B	B	B	A	B	B	A	B	B	A	B	B	B	B	A	B	B	B	B	B	A	B	B	B	B	A	B	B	B	B	A	B	B	A	B	B	A	B	B	B	B	A	B	B
Chr4_bin1542	121045414	A	B	B	B	B	B	B	A	B	B	A	B	B	A	B	B	B	B	A	B	B	B	B	B	A	B	B	B	B	A	B	B	B	B	A	B	B	A	B	B	A	B	B	B	B	A	B	B
Chr4_bin1543	121080722	A	B	B	B	B	B	B	A	B	B	A	B	B	A	B	B	B	B	A	B	B	B	B	B	A	B	B	B	B	A	B	B	B	B	A	B	B	A	B	B	A	B	B	B	B	A	B	B
Chr4_bin1544	121233868	A	B	B	B	B	B	B	A	B	B	A	B	B	A	B	B	B	B	B	B	B	B	B	B	A	B	B	B	B	A	B	B	B	B	A	B	B	A	B	B	A	B	B	B	B	A	B	B
Chr4_bin1545	121343388	A	B	B	B	B	B	A	A	B	B	A	B	B	A	B	B	B	B	B	B	B	B	B	B	B	B	B	B	B	A	B	B	B	B	A	B	B	A	B	B	A	B	B	B	B	A	B	B
Chr4_bin1546	121377880	A	B	B	B	B	B	A	A	B	B	A	B	B	A	B	B	B	B	B	B	B	B	B	B	B	B	B	B	B	A	B	B	B	B	A	B	B	A	B	B	A	B	B	B	B	A	B	B
Chr4_bin1547	121640546	A	B	B	B	B	B	A	A	B	B	A	B	B	A	B	B	B	B	B	B	B	B	B	B	B	B	B	B	B	A	B	B	B	B	A	B	B	A	B	B	A	B	B	B	B	A	B	B
Chr4_bin1548	121779237	A	B	B	B	B	B	A	A	B	B	B	B	B	A	B	B	B	B	B	B	B	B	B	B	B	B	B	B	B	A	B	B	B	B	A	B	B	A	B	B	A	B	B	B	B	A	B	B
Chr4_bin1549	121921807	A	B	B	B	B	B	A	A	B	B	B	B	B	A	B	B	B	B	B	B	B	B	B	B	B	B	B	B	B	A	B	B	B	B	A	B	B	A	B	B	A	B	B	B	B	A	B	B
Chr4_bin1550	121959547	A	B	B	B	B	B	A	A	B	B	B	B	B	A	B	B	B	B	B	B	B	B	B	B	B	B	B	B	B	A	B	B	B	B	A	B	B	A	B	B	A	B	B	B	B	A	B	B
Chr4_bin1551	122222213	A	B	B	B	B	B	A	A	B	B	B	B	B	A	B	B	B	A	B	B	B	B	B	B	B	B	B	B	B	A	B	B	B	B	A	B	B	A	B	B	A	B	B	B	B	A	B	B
Chr4_bin1552	122349512	A	B	B	B	B	B	A	A	B	B	B	B	B	A	B	B	B	A	B	B	B	B	B	B	B	B	B	B	B	A	B	B	B	B	A	B	B	A	B	B	A	B	B	B	B	A	B	B
Chr4_bin1553	122391175	A	B	B	B	B	B	A	A	B	B	B	B	B	A	B	B	B	A	B	B	B	B	B	B	B	B	B	B	B	A	B	B	B	B	A	B	B	A	B	B	A	B	B	B	B	A	B	B
Chr4_bin1554	122610176	A	B	B	B	B	B	A	A	B	B	B	B	B	A	B	B	B	A	B	B	B	B	B	B	B	B	B	B	B	A	B	B	B	B	A	B	B	A	B	B	A	B	B	B	B	A	B	B
Chr4_bin1555	122840089	A	B	B	B	B	B	A	A	B	B	B	B	B	A	B	B	B	A	B	B	B	B	A	B	B	B	B	B	B	A	B	B	B	B	A	B	B	A	B	B	A	B	B	B	B	A	B	B
Chr4_bin1556	123133682	A	B	B	B	B	B	A	A	B	B	B	B	B	A	B	B	B	A	B	B	B	B	A	B	B	B	B	B	B	A	B	B	B	B	A	B	B	A	B	B	A	B	B	B	B	A	B	B
Chr4_bin1557	123230351	A	B	B	B	B	B	A	A	B	B	B	B	B	A	B	B	B	A	B	B	B	B	A	B	B	B	B	B	B	A	B	B	B	B	A	B	B	A	A	B	A	B	B	B	B	A	B	B
Chr4_bin1558	123306665	A	B	B	B	B	B	A	A	B	B	B	B	B	A	B	B	B	A	B	B	B	B	A	B	B	B	B	B	B	A	B	B	B	B	A	B	B	A	A	B	A	B	B	B	B	A	B	B
Chr4_bin1559	123543045	A	B	B	B	B	B	A	A	B	B	B	B	B	A	B	B	B	A	B	B	B	B	A	B	B	B	B	B	B	A	B	B	B	B	A	B	B	A	A	B	A	B	B	B	B	A	B	B
Chr4_bin1560	123590294	A	B	B	B	B	B	A	A	B	B	B	B	B	A	B	B	B	A	B	B	B	B	A	B	B	B	B	B	B	A	B	B	B	B	A	B	B	A	A	B	A	B	B	B	B	A	B	B
Chr4_bin1561	123732520	A	B	B	B	B	B	A	A	B	B	B	B	B	A	B	B	B	A	B	B	B	B	A	B	B	B	B	B	B	A	B	B	B	B	A	B	B	A	A	B	A	B	B	B	B	A	B	B
Chr4_bin1562	124010987	A	B	B	B	B	B	A	A	B	B	B	B	B	A	B	B	B	A	B	B	B	B	A	B	B	B	B	B	B	A	B	B	B	B	A	B	B	A	A	B	A	B	B	B	B	A	B	B
Chr4_bin1563	124139092	A	B	B	B	B	B	A	A	B	B	B	B	B	A	B	B	B	A	B	B	B	B	A	B	B	B	B	B	B	A	B	B	B	B	A	B	B	A	A	B	A	B	B	B	B	A	B	B
Chr4_bin1564	124498262	A	B	B	B	B	B	A	A	B	B	B	B	B	A	B	B	B	A	B	B	B	B	A	B	B	B	B	B	B	A	B	B	B	B	A	B	B	A	A	B	A	B	B	B	B	A	B	B
Chr4_bin1565	124579329	A	B	B	B	B	B	A	A	B	B	B	B	B	A	B	B	B	A	B	B	B	B	A	B	B	B	B	B	B	A	B	B	B	B	A	B	B	A	A	B	A	B	B	B	B	A	B	B
Chr4_bin1566	124837256	A	B	B	B	B	B	A	A	B	B	B	B	B	A	B	B	B	A	B	B	B	B	A	B	B	B	B	B	B	A	B	B	B	B	A	B	B	A	A	B	A	B	B	B	B	A	B	B
Chr4_bin1567	124889660	A	B	B	B	B	B	A	A	B	B	B	B	B	A	B	B	B	A	B	B	B	B	A	B	B	B	B	B	B	A	B	B	B	B	A	B	B	B	A	B	A	B	B	B	B	A	B	B
Chr4_bin1568	125029977	A	B	B	B	B	B	A	A	B	B	B	B	B	A	B	B	B	A	B	B	B	B	A	B	B	B	B	B	B	A	B	B	B	B	A	B	B	B	A	B	A	B	B	B	B	A	B	B
Chr4_bin1569	125326039	A	B	B	B	B	B	A	A	B	B	B	B	B	A	B	B	B	A	B	B	B	B	A	B	B	B	B	B	B	A	B	B	B	B	A	B	B	B	A	B	A	B	B	B	B	A	B	B
Chr4_bin1570	125803963	A	B	B	B	B	B	A	A	B	B	B	B	B	A	B	B	B	A	B	B	B	B	A	B	B	B	B	B	B	A	B	B	B	B	A	B	B	B	A	B	A	B	B	B	B	A	B	B
Chr4_bin1571	128801742	A	B	B	B	B	B	A	A	B	B	B	B	B	A	B	B	B	A	B	B	B	B	A	B	B	B	B	B	B	A	B	B	B	B	A	B	B	B	A	B	A	B	B	B	B	A	B	B
Chr5_bin1572	6342696	A	A	B	B	A	A	B	B	A	B	B	A	B	B	B	B	B	A	B	A	B	B	A	B	B	B	A	A	A	A	A	B	A	A	B	B	B	B	A	B	A	B	B	B	A	B	A	A
Chr5_bin1573	6366841	A	A	B	B	A	A	B	B	A	B	B	A	B	B	B	B	B	A	B	A	B	B	A	B	B	B	A	A	A	A	A	B	A	A	B	B	B	B	A	B	A	B	B	B	A	B	A	A
Chr5_bin1574	6578654	A	A	B	B	A	A	B	B	A	B	B	A	B	B	B	B	B	A	B	A	B	B	A	B	B	B	A	A	A	A	A	B	A	A	B	B	B	B	A	B	A	B	B	B	A	B	A	A
Chr5_bin1575	6748591	A	A	B	B	A	A	B	B	A	B	B	A	B	B	B	B	B	A	B	A	B	B	A	B	B	B	A	A	A	A	A	B	A	A	B	B	B	B	A	B	A	B	B	B	A	B	A	A
Chr5_bin1576	6806444	A	A	B	B	A	A	B	B	A	B	B	A	B	B	B	B	B	A	B	A	B	B	A	B	B	B	A	A	A	A	A	B	A	A	B	B	B	B	A	B	A	B	B	B	A	B	A	A
Chr5_bin1577	7150196	A	A	B	B	A	A	B	B	A	B	B	A	B	B	B	B	B	A	B	A	B	B	A	B	B	B	A	A	A	A	A	B	A	A	B	B	B	B	A	B	A	B	B	B	A	B	A	A
Chr5_bin1578	7356310	A	A	B	B	A	A	B	B	A	B	B	A	B	B	B	B	B	A	B	A	B	B	A	B	B	B	A	A	A	A	A	B	A	A	B	B	B	B	A	B	A	B	B	B	A	B	A	A
Chr5_bin1579	7477689	A	A	B	B	A	A	B	B	A	B	B	A	B	B	B	B	B	A	B	A	B	B	A	B	B	B	A	A	A	A	A	B	A	A	B	B	B	B	A	B	A	B	B	B	A	B	A	A
Chr5_bin1580	7724197	A	A	B	B	A	A	B	B	A	B	B	A	B	B	B	B	B	A	B	A	B	B	A	B	B	B	A	A	A	A	A	B	A	A	B	B	B	B	A	B	A	B	B	B	A	B	A	A
Chr5_bin1581	7834012	A	A	B	B	A	A	B	B	B	B	B	A	A	B	B	B	B	A	B	A	B	B	A	B	B	B	A	A	A	A	A	B	A	A	B	B	B	B	A	B	A	B	B	B	A	B	A	A
Chr5_bin1582	7918927	A	A	B	B	A	A	B	B	B	B	B	A	A	B	B	B	B	A	B	A	B	B	A	B	B	B	A	A	A	A	A	B	A	A	B	B	B	B	A	B	A	B	B	B	A	B	A	A
Chr5_bin1583	7999893	A	A	B	B	A	A	B	B	B	B	B	A	A	B	B	B	B	A	B	A	B	B	A	B	B	B	A	A	A	A	A	B	A	A	B	B	B	B	A	B	A	B	B	B	A	B	A	A
Chr5_bin1584	8340614	A	A	B	B	A	A	B	B	B	B	B	A	A	B	B	B	B	A	B	A	B	B	A	B	B	B	A	A	A	A	A	B	A	A	B	B	B	B	A	B	A	B	B	B	A	B	A	A
Chr5_bin1585	8478892	A	A	B	B	A	A	B	B	B	B	B	A	A	B	B	B	B	A	B	A	B	B	A	B	B	B	A	A	A	A	A	B	A	A	B	B	B	B	A	B	A	B	B	B	A	B	A	A
Chr5_bin1586	8624898	A	A	B	B	A	A	B	B	B	B	B	A	A	B	B	B	B	A	B	A	B	B	A	B	B	B	A	A	A	A	A	B	A	A	B	B	B	B	A	B	A	B	B	B	A	B	A	A
Chr5_bin1587	8733172	A	A	B	B	A	A	B	B	B	B	B	A	A	B	B	B	B	A	B	A	B	B	A	B	B	B	A	A	A	A	A	B	A	A	B	B	B	B	A	B	A	B	B	B	A	B	A	A
Chr5_bin1588	8773573	A	A	B	B	A	A	B	B	B	B	B	A	A	B	B	B	B	A	B	A	B	B	A	B	B	B	A	A	A	A	A	B	A	A	B	B	B	B	A	B	A	B	B	B	A	B	A	A
Chr5_bin1589	8942482	A	A	B	B	A	A	B	B	B	B	B	A	A	B	B	B	B	A	B	A	B	B	A	B	B	B	A	A	A	A	A	B	A	A	B	B	B	B	A	B	A	B	B	B	A	B	A	A
Chr5_bin1590	8981573	A	A	A	B	A	A	B	B	B	B	B	A	A	B	B	B	B	A	A	A	B	B	A	B	B	B	A	A	A	A	A	B	A	A	B	B	B	B	A	B	A	B	B	B	A	B	A	A
Chr5_bin1591	9104570	A	A	A	B	A	A	B	B	B	B	B	A	A	B	B	B	B	A	A	A	B	B	A	B	B	B	A	A	A	A	A	B	A	A	B	B	B	B	A	B	A	B	B	B	A	B	A	A
Chr5_bin1592	9188253	A	A	A	B	A	A	B	B	B	B	B	A	A	B	B	B	B	A	A	A	B	B	A	B	B	B	A	A	A	A	A	B	A	A	B	B	B	B	A	B	A	B	B	B	A	B	A	A
Chr5_bin1593	9623758	A	A	A	B	A	A	B	B	B	B	B	A	A	B	B	B	B	A	A	A	B	B	A	B	B	B	A	A	A	A	A	B	A	A	B	B	B	B	A	B	A	B	B	B	A	B	A	A
Chr5_bin1594	10021043	A	A	A	B	A	A	B	B	B	B	B	A	A	B	B	B	B	A	A	A	B	B	A	B	B	B	A	A	A	A	A	B	B	A	B	B	B	B	A	B	A	B	B	A	A	B	A	A
Chr5_bin1595	10280640	A	A	A	B	A	A	B	B	B	B	B	A	A	B	B	B	B	A	A	A	B	B	A	B	A	B	A	A	A	A	A	B	B	A	B	B	B	B	A	B	A	B	B	A	A	B	A	A
Chr5_bin1596	10417076	A	A	A	B	A	A	B	B	B	B	B	A	A	B	B	B	B	A	A	A	B	B	A	B	A	B	A	A	A	A	A	B	B	A	B	B	B	B	A	B	A	B	B	A	A	B	A	A
Chr5_bin1597	10494133	A	A	A	B	A	A	B	B	B	B	B	A	A	B	B	B	B	A	A	A	B	B	A	B	A	B	A	A	A	A	A	B	B	A	B	B	B	B	A	B	A	B	B	A	A	B	A	A
Chr5_bin1598	10565129	A	A	A	B	A	A	B	B	B	B	B	A	A	B	B	B	B	A	A	A	B	A	A	B	A	B	A	A	A	A	A	B	B	A	B	B	B	B	A	B	A	B	B	A	A	B	A	A
Chr5_bin1599	10704392	A	A	A	B	A	A	B	B	B	B	B	A	A	B	B	B	B	A	A	A	B	A	A	B	A	B	A	A	A	A	A	B	B	A	B	B	B	B	A	B	A	B	B	A	A	B	A	A
Chr5_bin1600	10808279	A	A	A	B	A	A	B	B	B	B	B	A	A	B	B	B	B	A	A	A	B	A	A	B	A	B	A	A	A	A	A	B	B	A	B	B	B	B	A	B	A	B	B	A	A	B	A	A
Chr5_bin1601	10865591	A	A	A	B	A	A	B	B	B	B	B	A	A	B	B	B	B	A	A	A	B	A	A	B	A	B	A	A	A	A	A	B	B	A	B	B	B	B	A	B	A	B	B	A	A	B	A	A
Chr5_bin1602	11234849	A	A	A	B	A	A	B	B	B	B	B	A	A	B	B	B	B	A	A	A	B	A	A	B	A	B	A	A	A	A	A	B	B	A	B	B	B	B	A	B	A	B	B	A	A	B	A	A
Chr5_bin1603	11489197	A	A	A	B	A	A	B	B	B	B	B	A	A	B	B	B	B	B	A	A	B	A	A	B	A	B	A	A	A	A	A	B	B	A	B	B	B	B	A	B	A	B	B	A	A	B	A	A
Chr5_bin1604	11614793	A	A	A	B	A	A	B	B	B	B	B	A	A	B	B	B	B	B	A	A	B	A	A	B	A	B	A	A	A	A	A	B	B	A	B	B	B	B	A	B	A	B	B	A	A	B	A	A
Chr5_bin1605	11813573	A	A	A	B	A	A	B	B	B	B	B	A	A	B	B	B	B	B	A	A	B	A	A	B	A	B	A	A	A	A	A	B	B	A	B	B	B	B	A	B	A	B	B	A	A	B	A	A
Chr5_bin1606	12035162	A	A	A	B	A	A	B	B	B	B	B	A	A	B	B	B	B	B	A	A	B	A	A	B	A	B	A	A	A	A	A	B	B	A	B	B	B	B	A	B	A	B	B	A	A	B	A	A
Chr5_bin1607	12063632	A	A	A	B	A	A	B	B	B	B	B	A	A	B	B	B	B	B	A	A	B	A	A	B	A	B	A	A	A	A	A	B	B	A	B	B	B	B	A	B	A	B	B	A	A	B	A	A
Chr5_bin1608	12193409	A	A	A	B	A	A	B	B	B	B	B	A	A	B	B	B	B	A	A	A	B	A	A	B	A	B	A	A	A	A	A	B	B	A	B	B	B	B	A	B	A	B	B	A	A	B	A	A
Chr5_bin1609	12322528	A	A	A	B	A	A	B	B	B	B	B	B	A	B	B	B	B	A	A	A	B	A	A	B	A	B	A	A	A	A	A	B	B	A	B	A	B	B	A	B	A	B	B	A	A	B	A	A
Chr5_bin1610	12425330	A	A	A	B	A	A	B	B	B	B	B	B	A	B	B	B	B	A	A	A	B	A	A	B	A	B	A	A	A	A	A	B	B	A	B	A	B	B	A	B	A	B	B	A	A	B	A	A
Chr5_bin1611	12507373	A	A	A	A	A	A	B	B	B	B	B	B	A	B	B	B	B	A	A	A	B	A	A	B	A	B	A	A	A	A	A	B	B	A	B	A	B	B	A	B	A	B	B	A	A	B	A	A
Chr5_bin1612	12715915	A	A	A	A	A	A	B	B	B	B	B	B	A	B	B	B	B	A	A	A	B	A	A	B	A	B	A	A	A	A	A	B	B	A	B	A	B	B	A	B	A	B	B	A	A	B	A	A
Chr5_bin1613	12875878	A	A	A	A	A	A	B	B	B	B	B	B	A	B	B	B	B	A	A	A	B	A	A	B	A	B	A	A	A	A	A	B	B	A	B	A	B	B	A	B	A	B	B	A	A	B	A	A
Chr5_bin1614	12997714	A	A	A	A	A	A	B	B	B	B	B	B	A	B	B	B	B	A	A	A	B	A	A	B	A	B	A	A	A	A	A	B	B	A	B	A	B	B	A	B	A	B	B	A	A	B	A	A
Chr5_bin1615	13097605	A	A	A	A	A	A	B	B	B	B	B	B	A	B	B	B	B	A	A	A	B	A	A	B	A	B	A	A	A	A	A	B	B	A	B	A	B	B	A	B	A	B	B	A	A	B	A	A
Chr5_bin1616	13499476	A	A	A	A	A	A	B	B	B	B	B	B	A	B	B	B	B	A	A	A	B	A	A	B	A	B	A	A	A	A	A	B	B	A	B	A	B	B	A	B	A	B	B	A	A	B	A	A
Chr5_bin1617	13993806	A	A	A	A	A	A	B	B	B	B	B	B	A	B	B	B	B	A	A	A	B	A	A	B	A	B	A	A	A	A	A	B	B	A	B	A	B	B	A	B	A	B	B	A	A	B	A	A
Chr5_bin1618	14695729	A	A	A	A	A	A	B	B	B	B	B	B	A	B	B	B	B	A	A	A	B	A	A	B	A	B	A	A	A	A	A	B	B	A	B	A	B	B	A	B	A	B	B	A	A	B	A	A
Chr5_bin1619	15119175	A	A	A	A	A	A	B	B	B	B	B	B	A	B	B	B	B	A	A	A	B	A	A	B	A	B	A	A	A	A	A	B	B	A	B	A	B	B	A	B	A	B	B	A	A	B	A	A
Chr5_bin1620	15901804	A	A	A	A	A	A	B	B	B	B	B	B	A	B	B	B	B	A	A	A	B	A	A	B	A	B	A	A	A	A	A	B	B	A	B	A	B	B	A	B	A	B	B	A	A	B	A	A
Chr5_bin1621	16043711	A	A	A	A	A	A	B	B	B	B	B	B	A	B	B	B	B	A	A	A	B	A	A	B	A	B	A	A	A	A	A	B	B	A	B	A	B	B	A	B	A	B	B	A	A	B	A	A
Chr5_bin1622	16180190	A	A	A	A	A	A	B	B	B	B	B	B	A	B	B	B	B	A	A	A	B	A	A	B	A	B	A	A	A	A	A	B	B	A	B	A	B	B	A	B	A	B	B	A	A	B	A	A
Chr5_bin1623	16940272	A	A	A	A	A	A	B	B	B	B	B	B	A	B	B	B	B	A	A	A	B	A	A	B	A	B	A	A	A	A	A	B	B	A	B	A	B	B	A	B	A	B	B	A	A	B	A	A
Chr5_bin1624	16982408	A	A	A	A	A	A	B	B	B	B	B	B	A	B	B	B	B	A	A	A	B	A	A	B	A	B	A	A	A	A	A	B	B	A	B	A	B	B	A	B	A	B	B	A	A	B	A	A
Chr5_bin1625	17177164	A	A	A	A	A	A	B	B	B	B	B	B	A	B	B	B	B	A	A	A	B	A	A	B	A	B	A	A	A	A	A	B	B	A	B	A	B	B	A	B	A	B	B	A	A	B	A	A
Chr5_bin1626	17647175	A	A	A	A	A	A	B	B	B	B	B	B	A	B	B	B	B	A	A	A	B	A	A	B	A	B	A	A	A	A	A	B	B	A	B	A	B	B	A	B	A	B	B	A	A	B	A	A
Chr5_bin1627	18076606	A	A	A	A	A	A	B	B	B	B	B	B	A	B	B	B	B	A	A	A	B	A	A	B	A	B	A	A	A	A	A	B	B	A	B	A	B	B	A	B	A	B	B	A	A	B	A	A
Chr5_bin1628	18362007	A	A	A	A	A	A	B	B	B	B	B	B	A	B	B	B	B	A	A	A	B	A	A	B	A	B	A	A	A	A	A	B	B	A	B	A	B	B	A	B	A	B	B	A	A	B	A	A
Chr5_bin1629	18845368	A	A	A	A	A	A	B	B	B	B	B	B	A	B	B	B	B	A	A	A	B	A	A	B	A	B	A	A	A	A	A	B	B	A	B	A	B	B	A	B	A	B	B	A	A	B	A	A
Chr5_bin1630	18966014	A	A	A	A	A	A	B	B	B	B	B	B	A	B	B	B	B	A	A	A	B	A	A	B	A	B	A	A	A	A	A	B	B	A	B	A	B	B	A	B	A	B	B	A	A	B	A	A
Chr5_bin1631	19345049	A	A	A	A	A	A	B	B	B	B	B	B	A	B	B	B	B	A	A	A	B	A	A	B	A	B	A	A	A	A	A	B	B	A	B	A	B	B	A	B	A	B	B	A	A	B	A	A
Chr5_bin1632	21018432	A	A	A	A	A	A	B	B	B	B	B	B	A	B	B	B	B	A	A	A	B	A	A	B	A	B	A	A	A	A	A	B	B	A	B	A	B	B	A	B	A	B	B	A	A	B	A	A
Chr5_bin1633	21299247	A	A	A	A	A	A	B	B	B	B	B	B	A	B	B	B	B	A	A	A	B	A	A	B	A	B	A	A	A	A	A	B	B	A	B	A	B	B	A	B	A	B	B	A	A	B	A	A
Chr5_bin1634	21689990	A	A	A	A	A	A	B	B	B	B	B	B	A	B	B	B	B	A	A	A	B	A	A	B	A	B	A	A	A	A	A	B	B	A	B	A	B	B	A	B	A	B	B	A	A	B	A	A
Chr5_bin1635	22322648	A	A	A	A	A	A	B	B	B	B	B	B	A	B	B	B	B	A	A	A	B	A	A	B	A	B	A	A	A	A	A	B	B	A	B	A	B	B	A	B	A	B	B	A	A	B	A	A
Chr5_bin1636	23123080	A	A	A	A	A	A	B	B	B	B	B	B	A	B	B	B	B	A	A	A	B	A	A	B	A	B	A	A	A	A	A	B	B	A	B	A	B	B	A	B	A	B	B	A	A	B	A	A
Chr5_bin1637	24349411	A	A	A	A	A	A	B	B	B	B	B	B	A	B	B	B	B	A	A	A	B	A	A	B	A	B	A	A	A	A	A	B	B	A	B	A	B	B	A	B	A	B	B	A	A	B	A	A
Chr5_bin1638	25109544	A	A	A	A	A	A	B	B	B	B	B	B	A	B	B	B	B	A	A	A	B	A	A	B	A	B	A	A	A	A	A	B	B	A	B	A	B	B	A	B	A	B	B	A	A	B	A	A
Chr5_bin1639	26574469	A	A	A	A	A	A	B	B	B	B	B	B	A	B	B	B	B	A	A	A	B	A	A	B	A	B	A	A	A	A	A	B	B	A	B	A	B	B	A	B	A	B	B	A	A	B	A	A
Chr5_bin1640	27109201	A	A	A	A	A	A	B	B	B	A	B	B	A	B	B	B	B	A	A	A	B	A	A	B	A	B	A	A	A	B	A	B	B	A	B	A	B	B	A	B	A	B	B	A	A	B	A	A
Chr5_bin1641	27155483	A	A	A	A	A	A	B	B	B	A	B	B	A	B	B	B	B	A	A	A	B	A	A	B	A	B	A	A	A	B	A	B	B	A	B	A	B	B	A	B	A	B	B	A	A	B	A	A
Chr5_bin1642	27348622	A	A	A	A	A	A	B	B	B	A	B	B	A	B	B	B	B	A	A	A	B	A	A	B	A	B	A	A	A	B	A	B	B	A	B	A	B	B	A	B	A	B	B	A	A	B	A	A
Chr5_bin1643	27425947	A	A	A	A	A	A	B	B	B	A	B	B	A	B	B	B	B	A	A	A	B	A	A	B	A	B	A	A	A	B	A	B	B	A	B	A	B	B	A	B	A	B	B	A	A	B	A	A
Chr5_bin1644	27805027	A	A	A	A	A	A	B	B	B	A	B	B	A	B	B	B	B	A	A	B	B	A	A	B	A	B	A	A	A	B	A	B	B	A	B	A	B	B	A	B	A	B	B	A	A	B	A	A
Chr5_bin1645	27855101	A	A	A	A	A	A	B	B	B	A	B	B	A	B	B	B	B	A	A	B	B	A	A	B	A	B	A	A	A	B	A	B	B	A	B	A	B	B	A	A	A	B	B	A	A	B	A	A
Chr5_bin1646	28494653	A	A	A	A	A	A	B	B	B	A	B	B	A	B	B	B	B	A	A	B	B	A	A	B	A	B	A	A	A	B	A	B	B	A	B	A	B	B	A	A	A	B	B	A	A	B	A	A
Chr5_bin1647	28629365	A	A	A	A	A	A	B	B	B	A	B	B	A	B	B	B	B	A	A	B	B	A	A	B	A	B	A	A	A	B	A	B	B	A	B	A	B	B	A	A	A	B	B	A	A	B	A	A
Chr5_bin1648	28837913	A	A	A	A	A	A	B	B	B	A	B	B	A	B	B	B	B	A	A	B	B	A	A	B	A	B	A	A	A	B	A	B	B	A	B	A	B	B	A	A	A	B	B	A	A	B	A	A
Chr5_bin1649	29762303	A	A	A	A	A	A	B	B	B	A	B	B	A	B	B	B	B	A	A	B	B	A	A	B	A	B	A	A	A	B	A	B	B	A	B	A	B	B	A	A	A	B	B	A	A	B	A	A
Chr5_bin1650	30746145	A	A	B	A	A	A	B	B	B	A	B	B	A	B	B	B	B	A	A	B	B	A	A	B	A	B	A	A	A	B	A	B	B	A	B	A	B	B	A	A	A	B	B	A	A	B	A	A
Chr5_bin1651	31116445	A	A	B	A	A	A	B	B	B	A	B	B	A	B	B	B	B	A	A	B	B	A	A	B	A	B	A	A	A	B	A	B	B	A	B	A	B	B	A	A	A	B	B	A	A	B	A	A
Chr5_bin1652	31309117	A	A	B	A	A	A	B	B	B	A	B	B	A	B	B	B	B	A	A	B	B	A	A	B	A	B	A	A	A	B	A	B	B	A	B	A	B	B	A	A	A	B	B	A	A	B	A	A
Chr5_bin1653	31454598	A	A	B	A	A	A	B	B	B	A	B	B	A	B	B	B	B	A	A	B	B	A	A	B	A	B	A	B	A	B	A	B	B	A	B	A	B	B	A	A	A	B	B	A	A	B	A	A
Chr5_bin1654	31827788	A	A	B	A	A	A	B	B	B	A	B	B	A	B	B	B	B	A	A	B	B	A	A	B	A	B	A	B	A	B	A	B	B	A	B	A	B	B	A	A	A	B	B	A	A	B	A	A
Chr5_bin1655	32105748	A	A	B	A	A	A	B	B	B	A	B	B	A	B	B	B	B	A	A	B	B	A	A	B	A	B	A	B	A	B	A	B	B	A	B	A	B	B	A	A	A	B	B	A	A	B	A	A
Chr5_bin1656	32533339	A	A	B	A	A	A	B	B	B	A	B	B	A	B	B	B	B	A	A	B	B	A	A	B	A	B	A	B	A	B	A	B	B	A	B	A	B	B	A	A	A	B	B	A	A	B	A	A
Chr5_bin1657	32606651	A	A	B	A	A	A	B	B	B	A	B	B	A	B	B	B	B	A	A	B	B	A	A	B	A	B	A	B	A	B	A	B	B	A	B	A	B	B	A	A	A	B	B	A	A	B	A	A
Chr5_bin1658	33121504	A	A	B	A	A	A	B	B	B	A	B	B	A	B	B	B	B	A	A	B	B	A	A	B	A	B	A	B	A	B	A	B	B	A	B	A	B	B	A	A	A	B	B	A	A	B	A	A
Chr5_bin1659	33273092	A	A	B	A	A	A	B	B	B	A	B	B	A	B	B	B	B	A	A	B	B	A	A	B	A	B	A	B	A	B	A	B	B	A	B	A	B	B	A	A	A	B	B	A	A	B	A	A
Chr5_bin1660	33740401	A	A	B	A	A	A	B	B	B	A	B	B	A	B	B	B	B	A	A	B	B	A	A	B	A	B	A	B	A	B	A	B	B	A	B	A	B	B	A	A	A	B	B	A	A	B	A	A
Chr5_bin1661	33931234	A	A	B	A	A	A	B	B	B	A	B	B	A	B	B	B	B	A	A	B	B	A	A	B	A	B	A	B	A	B	A	B	B	A	B	A	B	B	A	A	A	B	B	A	A	B	A	A
Chr5_bin1662	34042071	A	A	B	A	A	A	B	B	B	A	B	B	A	B	B	B	B	A	A	B	B	A	A	B	A	B	A	B	A	B	A	B	B	A	B	A	B	B	A	A	A	B	B	A	A	B	A	A
Chr5_bin1663	34098447	A	A	B	A	A	A	B	B	B	A	B	B	A	B	B	B	B	A	A	B	B	A	A	B	A	B	A	B	A	B	A	B	B	A	B	A	B	B	A	A	A	B	B	A	A	B	A	A
Chr5_bin1664	34476592	A	A	B	A	A	A	B	B	B	A	B	B	A	B	B	B	B	A	A	B	B	A	A	B	A	B	A	B	A	B	A	B	B	A	B	A	B	B	A	A	A	B	B	A	A	B	A	A
Chr5_bin1665	34714685	A	A	B	A	A	A	B	B	B	A	B	B	A	B	B	B	B	A	A	B	B	A	A	B	A	B	A	B	A	B	A	B	B	A	B	A	B	B	A	A	A	B	B	A	A	B	A	A
Chr5_bin1666	34879338	A	A	B	A	A	A	B	B	B	A	B	B	A	B	B	B	B	A	A	B	B	A	A	B	A	B	A	B	A	B	A	B	B	A	B	A	B	B	A	A	A	B	B	A	A	B	A	A
Chr5_bin1667	35135001	A	A	B	A	A	A	B	B	B	A	B	B	A	B	B	B	B	A	A	B	B	A	A	B	A	B	A	B	A	B	A	B	B	A	B	A	B	B	A	A	A	B	B	A	A	B	A	A
Chr5_bin1668	35760423	A	A	B	A	A	A	A	B	B	A	B	B	A	B	B	B	B	A	A	B	B	A	A	B	A	B	A	B	A	B	A	B	B	A	B	A	B	B	A	A	A	B	B	A	A	B	A	A
Chr5_bin1669	36218239	A	A	B	A	A	A	A	B	B	A	B	B	A	B	B	B	B	A	A	B	B	A	A	B	A	B	A	B	A	B	A	B	B	A	B	A	B	B	A	A	A	B	B	A	A	B	A	A
Chr5_bin1670	36338524	A	A	B	A	A	A	A	B	B	A	B	B	A	B	B	B	B	A	A	B	B	A	A	B	A	B	A	B	A	B	A	B	B	A	B	A	B	B	A	A	A	B	B	A	A	B	A	A
Chr5_bin1671	36537685	A	A	B	A	A	A	A	B	B	A	B	B	A	B	B	B	B	A	A	B	B	A	A	B	A	B	A	B	A	B	A	B	B	A	B	A	B	B	A	A	A	B	B	A	A	B	A	A
Chr5_bin1672	37403267	A	A	B	A	A	A	A	B	B	A	B	B	A	B	B	B	B	A	A	B	B	A	A	B	A	B	A	B	A	B	A	B	B	A	B	A	B	B	A	A	A	B	B	A	A	B	A	A
Chr5_bin1673	37462448	A	A	B	A	A	A	A	B	B	A	B	B	A	B	B	B	B	A	A	B	B	A	A	B	A	B	A	B	A	B	A	B	B	A	B	A	B	B	A	A	A	B	B	A	A	B	A	A
Chr5_bin1674	37817803	A	A	B	A	A	A	A	B	B	A	B	B	A	B	B	B	B	A	A	B	B	A	A	B	A	B	A	B	A	B	A	B	B	A	B	A	B	B	A	A	A	B	B	A	A	B	A	A
Chr5_bin1675	38054719	A	A	B	A	A	A	A	B	B	A	B	B	A	B	B	B	B	A	A	B	B	A	A	B	A	B	A	B	A	B	A	B	B	A	B	B	B	B	A	A	A	B	B	A	A	B	A	A
Chr5_bin1676	38328084	A	A	B	A	A	A	A	B	B	A	B	B	A	B	B	B	B	A	A	B	B	A	A	B	A	B	A	B	A	B	A	B	B	A	B	B	B	B	A	A	A	B	B	A	A	B	A	A
Chr5_bin1677	38451659	A	A	B	A	A	A	A	B	B	A	B	B	A	B	B	B	B	A	A	B	B	A	A	B	A	B	A	B	A	B	A	B	B	A	B	B	B	B	A	A	A	B	B	A	A	B	A	A
Chr5_bin1678	38744321	A	A	B	A	A	A	A	B	B	A	B	B	A	B	B	B	B	A	A	B	B	A	A	B	A	B	A	B	A	B	A	B	B	A	B	B	B	B	A	A	A	B	B	A	A	B	A	A
Chr5_bin1679	39336338	A	A	B	A	A	A	A	B	B	A	B	B	A	B	B	B	B	A	A	B	B	A	A	B	A	B	A	B	A	B	A	B	B	A	B	B	B	B	A	A	A	B	B	A	A	B	A	A
Chr5_bin1680	39863580	A	A	B	A	A	A	A	B	B	A	B	B	A	B	B	B	B	A	A	B	B	A	A	B	A	B	A	B	A	B	A	B	B	A	B	B	B	B	A	A	A	B	B	A	A	B	A	A
Chr5_bin1681	41200792	A	A	B	A	A	A	A	B	B	A	B	B	A	B	B	B	B	A	A	B	B	A	A	B	A	B	A	B	A	B	A	B	B	A	B	B	B	B	A	A	A	B	B	A	A	B	A	A
Chr5_bin1682	41656676	A	A	B	A	A	A	A	B	B	A	B	B	A	B	B	B	B	A	A	B	B	A	A	B	A	B	A	B	A	B	A	B	B	A	B	B	B	B	A	A	A	B	B	A	A	B	A	A
Chr5_bin1683	41926676	A	A	B	A	A	A	A	B	B	A	B	B	A	B	B	B	B	A	A	B	B	A	A	B	A	B	A	B	A	B	A	B	B	A	B	B	B	B	A	A	A	B	B	A	A	B	A	A
Chr5_bin1684	42094698	A	A	B	A	A	A	A	B	B	A	B	B	A	B	B	B	B	A	A	B	B	A	A	B	A	B	A	B	A	B	A	B	B	A	B	B	B	B	A	A	A	B	B	A	A	B	A	A
Chr5_bin1685	42841682	A	A	B	A	A	A	A	B	B	A	B	B	A	B	B	B	B	A	A	B	B	A	A	B	A	B	A	B	A	B	A	B	B	A	B	B	B	B	A	A	A	B	B	A	A	B	A	A
Chr5_bin1686	43040120	A	A	B	A	A	A	A	B	B	A	B	B	A	B	B	B	B	A	A	B	B	A	A	B	A	B	A	B	A	B	A	B	B	A	B	B	B	B	A	A	A	B	B	A	A	B	A	A
Chr5_bin1687	48803615	A	A	B	A	A	A	A	B	B	A	B	B	A	B	B	B	B	A	A	B	B	A	A	B	A	B	A	B	A	B	A	B	B	A	B	B	B	B	A	A	A	B	B	A	A	B	A	A
Chr5_bin1688	49944949	A	A	B	A	A	A	A	B	B	A	B	B	A	B	B	B	B	A	A	B	B	A	A	B	A	B	A	B	A	B	A	B	B	A	B	B	B	B	A	A	A	B	B	A	A	B	A	A
Chr5_bin1689	51565554	A	A	B	A	A	A	A	B	B	A	B	B	A	B	B	B	B	A	A	B	B	A	A	B	A	B	A	B	A	B	A	B	B	A	B	B	B	B	A	A	A	B	B	A	A	B	A	A
Chr5_bin1690	52715177	A	A	B	A	A	A	A	B	B	A	B	B	A	B	B	B	B	A	A	B	B	A	A	B	A	B	A	B	A	B	A	B	B	A	B	B	B	B	A	A	A	B	B	A	A	B	A	A
Chr5_bin1691	53098700	A	A	B	A	A	A	A	B	B	A	B	B	A	B	B	B	B	A	A	B	B	A	A	B	A	B	A	B	A	B	A	B	B	A	B	B	B	B	A	A	A	B	B	A	A	B	A	A
Chr5_bin1692	54596336	A	A	B	A	A	A	A	B	B	A	B	B	A	B	B	B	B	A	A	B	B	A	A	B	A	B	A	B	A	B	A	B	B	A	B	B	B	B	A	A	A	B	B	A	A	B	A	A
Chr5_bin1693	55754630	A	A	B	A	A	A	A	B	B	A	B	B	A	B	B	B	B	A	A	B	B	A	A	B	A	B	A	B	A	B	A	B	B	A	B	B	B	B	A	A	A	B	B	A	A	B	A	A
Chr5_bin1694	61435781	A	A	B	A	A	A	A	B	B	A	B	B	A	B	B	B	B	A	A	B	B	A	A	B	A	B	A	B	A	B	A	B	B	A	B	B	B	B	A	A	A	B	B	A	A	B	A	A
Chr5_bin1695	62332822	A	A	B	A	A	A	A	B	B	A	B	B	A	B	B	B	B	A	A	B	B	A	A	B	A	B	A	B	A	B	A	B	B	A	B	B	B	B	A	A	A	B	B	A	A	B	A	A
Chr5_bin1696	64189821	A	A	B	A	A	A	A	B	B	A	B	B	A	B	B	B	B	A	A	B	B	A	A	B	A	B	A	B	A	B	A	B	B	A	B	B	B	B	A	A	A	B	B	A	A	B	A	A
Chr5_bin1697	65006943	A	A	B	A	A	A	A	B	B	A	B	B	A	B	B	B	B	A	A	B	B	A	A	B	A	B	A	B	A	B	A	B	B	A	B	B	B	B	A	A	A	B	B	A	A	B	A	A
Chr5_bin1698	74712039	A	A	B	A	A	A	A	B	B	A	B	B	A	B	B	B	B	A	A	B	B	A	A	B	A	B	A	B	A	B	A	B	B	A	B	B	B	B	A	A	A	B	B	A	A	B	A	A
Chr5_bin1699	74806127	A	A	B	A	A	A	A	B	B	A	B	B	A	B	B	B	B	A	A	B	B	A	A	B	A	B	A	B	A	B	A	B	B	A	B	B	B	B	A	A	A	B	B	A	A	B	A	A
Chr5_bin1700	82171733	A	A	B	A	A	A	A	B	B	A	B	B	A	B	B	B	B	A	A	B	B	A	A	B	A	B	A	B	A	B	A	B	B	A	B	B	B	B	A	A	A	B	B	A	A	B	A	A
Chr5_bin1701	83075867	A	A	B	A	A	A	A	B	B	A	B	B	A	B	B	B	B	A	A	B	B	A	A	B	A	B	A	B	A	B	A	B	B	A	B	B	B	B	A	A	A	B	B	A	A	B	A	A
Chr5_bin1702	86967442	A	A	B	A	A	A	A	B	B	A	B	B	A	B	B	B	B	A	A	B	B	A	A	B	A	B	A	B	A	B	A	B	B	A	B	B	B	B	A	A	A	B	B	A	A	B	A	A
Chr5_bin1703	87137570	A	A	B	A	A	A	A	B	B	A	B	B	A	B	B	B	B	A	A	B	B	A	A	B	A	B	A	B	A	B	A	B	B	A	B	B	B	B	A	A	A	B	B	A	A	B	A	A
Chr5_bin1704	87247241	A	A	B	A	A	A	A	B	B	A	B	B	A	B	B	B	B	A	A	B	B	A	A	B	A	B	A	B	A	B	A	B	B	A	B	B	B	B	A	A	A	B	B	A	A	B	A	A
Chr5_bin1705	87258195	A	A	B	A	A	A	A	B	B	A	B	B	A	B	B	B	B	A	A	B	B	A	A	B	A	B	A	B	A	B	A	B	B	A	B	B	B	B	A	A	A	B	B	A	A	B	A	A
Chr5_bin1706	87418308	A	A	B	A	A	A	A	B	B	A	B	B	A	B	B	B	B	A	A	B	B	A	A	B	A	B	A	B	A	B	A	B	B	A	B	B	B	B	A	A	A	B	B	A	A	B	A	A
Chr5_bin1707	90028653	A	A	B	A	A	A	A	B	B	A	B	B	A	B	B	B	B	A	A	B	B	A	A	B	A	B	A	B	A	B	A	B	B	A	B	B	B	B	A	A	A	B	B	A	A	B	A	A
Chr5_bin1708	90145800	A	A	B	A	A	A	A	B	B	A	B	B	A	B	B	B	B	A	A	B	B	A	A	B	A	B	A	B	A	B	A	B	B	A	B	B	B	B	A	A	A	B	B	A	A	B	A	A
Chr5_bin1709	90225922	A	A	B	A	A	A	A	B	B	A	B	B	A	B	B	B	B	A	A	B	B	A	A	B	A	B	A	B	A	B	A	B	B	B	B	B	B	B	A	A	A	B	B	A	A	B	A	A
Chr5_bin1710	90265333	A	A	B	A	A	A	A	B	B	A	B	B	A	B	B	B	B	A	A	B	B	A	A	B	A	B	A	B	A	B	A	B	B	B	B	B	B	B	A	A	A	B	B	A	A	B	B	A
Chr5_bin1711	90510988	A	A	B	A	A	A	A	B	B	A	B	B	A	B	B	B	B	A	A	B	B	A	B	B	A	B	A	B	A	B	A	B	B	B	B	B	B	B	A	A	A	B	B	A	A	B	B	A
Chr5_bin1712	90553248	A	A	B	A	A	A	A	B	B	A	B	B	A	B	B	B	B	A	A	B	B	A	B	B	A	B	A	B	A	B	A	B	B	B	B	B	B	B	A	A	A	B	B	A	A	B	B	A
Chr5_bin1713	90839711	A	A	B	A	A	A	A	B	B	A	B	A	A	B	B	B	B	A	A	B	B	A	B	B	A	B	A	B	A	B	A	B	B	B	B	B	B	B	A	A	A	B	B	A	A	B	B	A
Chr5_bin1714	90898684	A	A	B	A	A	A	A	B	B	A	B	A	A	B	B	B	B	A	A	B	A	A	B	B	A	B	A	B	A	B	A	B	B	B	B	B	B	B	A	A	A	B	B	A	A	B	B	A
Chr5_bin1715	90962378	A	A	B	A	A	A	A	B	B	A	B	A	A	B	B	B	B	A	A	B	A	A	B	B	A	B	A	B	A	B	A	B	B	B	B	B	B	B	A	A	A	B	B	A	A	B	B	A
Chr5_bin1716	91080345	A	A	B	A	A	A	A	B	B	A	B	A	A	B	B	B	B	A	A	B	A	A	B	B	A	B	A	B	A	B	A	B	B	B	B	B	B	B	A	A	A	B	B	A	A	B	B	A
Chr5_bin1717	91207034	A	A	B	A	A	A	A	B	B	A	B	A	A	B	B	B	B	B	A	B	A	A	B	B	A	B	A	B	A	B	A	B	B	B	B	B	B	B	A	A	A	B	B	A	A	B	B	A
Chr5_bin1718	91377741	A	A	B	A	A	A	A	B	B	A	B	A	A	B	B	B	B	B	A	B	A	A	B	B	A	B	A	B	A	B	A	B	B	B	B	B	B	B	A	A	A	B	B	A	A	B	B	A
Chr5_bin1719	91497723	A	A	B	A	A	A	A	B	B	A	B	A	A	B	B	B	B	B	A	B	A	A	B	B	A	B	A	B	A	B	A	B	B	B	B	B	B	B	A	A	A	B	B	A	A	B	B	A
Chr5_bin1720	91942193	A	A	B	A	A	A	A	B	B	A	B	A	A	B	B	B	B	B	A	B	A	A	B	B	A	B	A	B	A	B	A	A	B	B	B	B	B	B	A	A	A	B	B	A	A	B	B	A
Chr5_bin1721	91965485	A	A	B	A	A	A	A	B	B	A	B	A	A	B	B	B	B	B	A	B	A	A	B	B	A	B	A	B	A	B	A	A	B	B	B	B	B	B	A	A	A	B	B	A	A	B	B	A
Chr5_bin1722	92313021	A	A	B	A	A	A	A	B	B	A	B	A	A	B	B	B	B	B	A	B	A	A	B	B	A	B	A	B	A	B	A	A	B	B	B	B	B	B	A	A	A	B	B	A	A	B	B	A
Chr5_bin1723	92447162	A	A	B	A	A	A	A	B	B	A	B	A	A	B	B	B	B	B	A	B	A	A	B	B	A	B	A	B	A	B	A	A	B	B	B	B	B	B	A	A	A	B	B	A	A	B	B	A
Chr5_bin1724	92464967	A	A	B	A	A	A	A	B	B	A	B	A	A	B	B	B	B	B	A	B	A	A	B	B	A	B	A	B	A	B	A	A	B	B	B	B	B	B	A	A	A	B	B	A	A	B	B	A
Chr5_bin1725	92693013	A	A	B	A	A	A	A	B	B	A	B	A	A	B	B	B	B	B	A	B	A	A	B	B	A	B	A	B	A	B	A	A	B	B	B	B	B	B	A	A	A	B	B	A	A	B	B	A
Chr5_bin1726	92821336	A	A	B	A	A	A	A	B	B	A	B	A	A	B	B	B	B	B	A	B	A	A	B	B	A	B	A	B	A	B	A	A	B	B	B	B	B	B	A	A	A	B	B	A	A	B	B	A
Chr5_bin1727	92938164	A	A	B	A	A	A	A	B	B	A	B	A	A	B	B	B	B	B	A	B	A	A	B	B	A	B	A	B	A	B	A	A	B	B	B	B	B	B	A	A	A	B	B	A	A	B	B	A
Chr5_bin1728	93792766	A	A	B	A	A	A	B	B	B	A	B	A	A	B	B	B	B	B	A	B	A	A	B	B	A	B	A	A	A	B	A	A	B	B	B	B	B	B	A	A	A	B	B	A	A	B	B	A
Chr5_bin1729	94144206	A	A	B	A	A	A	B	B	B	A	B	A	A	B	B	B	B	B	A	B	A	A	B	B	A	B	A	A	A	B	A	A	B	B	B	B	B	B	A	A	A	B	B	A	A	B	B	A
Chr5_bin1730	94237627	A	A	B	A	A	A	B	B	B	A	B	A	A	B	B	B	B	B	A	B	A	A	B	B	A	B	A	A	A	B	A	A	B	B	B	B	B	B	A	A	A	B	B	A	A	B	B	A
Chr5_bin1731	94301735	A	A	B	A	A	A	B	B	B	A	B	A	A	B	B	B	B	B	A	B	A	A	B	B	A	B	A	A	A	B	A	A	B	B	B	B	B	B	A	A	A	B	B	A	A	B	B	A
Chr5_bin1732	94434531	A	A	B	A	A	A	B	B	B	A	B	A	A	B	B	B	B	B	A	B	A	A	B	B	A	B	A	A	A	B	A	A	B	B	B	B	B	B	A	A	A	B	B	A	A	B	B	A
Chr5_bin1733	94539866	A	A	B	A	A	A	B	B	B	A	B	A	A	B	B	B	B	B	A	B	A	A	B	B	A	B	A	A	A	B	A	A	B	B	B	B	B	B	A	A	A	B	B	A	A	B	B	A
Chr5_bin1734	94572547	A	A	B	A	A	A	B	B	B	A	B	A	A	B	B	B	B	B	A	B	A	A	B	B	A	B	A	A	A	B	A	A	B	B	B	B	B	B	A	A	A	B	B	A	A	B	B	A
Chr5_bin1735	94848476	A	A	B	A	A	A	B	B	B	A	B	A	A	B	B	B	B	B	A	B	A	A	B	B	A	B	A	A	A	B	A	A	B	B	B	B	B	B	A	A	A	B	B	A	A	B	B	A
Chr5_bin1736	94887761	A	A	B	A	A	A	B	B	B	A	B	A	A	B	B	B	B	B	A	B	A	A	B	B	A	B	A	A	A	B	A	A	B	B	B	B	B	B	A	A	A	B	B	A	A	B	B	A
Chr5_bin1737	94976930	A	A	B	A	A	A	B	B	B	A	B	A	A	B	B	B	B	B	A	B	A	A	B	B	A	B	A	A	A	B	A	A	B	B	B	B	B	B	A	A	A	B	B	A	A	B	B	A
Chr5_bin1738	95110058	A	A	B	A	A	A	B	B	B	A	B	A	A	B	B	B	B	B	A	B	A	B	B	B	B	B	A	A	A	B	A	A	B	B	B	B	B	B	A	A	A	B	B	A	A	B	B	A
Chr5_bin1739	95291776	A	A	B	A	A	A	B	B	B	A	B	A	A	B	B	B	B	B	A	B	A	B	B	B	B	B	A	A	A	B	A	A	B	B	B	B	B	B	A	A	A	B	A	A	A	B	B	A
Chr5_bin1740	95447314	A	A	B	A	A	A	B	B	B	A	B	A	A	B	B	B	B	B	A	B	A	B	B	B	B	B	A	A	A	B	A	A	B	B	B	A	B	B	A	A	A	B	A	A	A	B	B	A
Chr5_bin1741	95632968	A	A	B	A	A	A	B	B	B	A	B	A	A	A	B	B	B	B	A	B	A	B	B	B	B	B	A	A	A	B	A	A	B	B	B	A	B	B	A	A	A	B	A	A	A	B	B	A
Chr5_bin1742	95727122	A	A	B	A	A	A	B	B	B	A	B	A	A	A	B	B	B	B	A	B	A	B	B	B	B	B	A	A	A	B	A	A	B	B	B	A	B	B	A	A	A	B	A	A	A	B	B	A
Chr5_bin1743	95938223	A	A	B	A	A	A	B	B	B	A	B	A	A	A	B	B	B	B	A	B	A	B	B	B	B	B	A	A	A	B	A	A	B	B	B	A	B	B	A	A	A	B	A	A	A	B	B	A
Chr5_bin1744	96022181	A	A	B	A	A	A	B	B	B	A	B	A	A	A	B	B	B	B	A	B	A	B	B	B	B	B	A	A	A	B	A	A	B	B	B	A	B	B	A	A	A	B	A	A	A	B	B	A
Chr5_bin1745	96051229	A	A	B	A	A	A	B	B	B	A	B	A	A	A	B	B	B	B	A	B	A	B	B	B	B	B	A	A	A	B	A	A	B	B	B	A	B	B	A	A	A	B	A	A	A	B	B	A
Chr5_bin1746	96514224	A	A	B	A	A	A	B	B	B	A	B	A	A	A	B	B	B	B	A	B	A	B	B	B	B	B	A	A	A	B	A	A	B	B	B	A	B	B	A	A	A	B	A	A	A	B	B	A
Chr5_bin1747	96718772	A	A	B	A	A	A	B	B	B	A	B	A	A	A	B	B	B	B	A	B	A	B	B	B	B	B	A	A	A	B	A	A	B	B	B	A	B	B	A	A	A	B	A	A	A	B	B	A
Chr5_bin1748	96824495	A	A	B	A	A	A	B	B	B	A	B	A	A	A	B	B	B	B	A	B	A	B	B	B	B	B	A	A	A	B	A	A	B	B	B	A	B	B	A	A	A	B	A	A	A	B	B	A
Chr5_bin1749	96919386	A	A	B	A	A	A	B	B	B	A	B	A	A	A	B	B	B	B	A	B	A	B	B	B	B	B	A	A	A	B	A	A	B	B	B	A	B	B	A	A	A	B	A	A	A	B	B	A
Chr5_bin1750	97007831	A	A	B	A	A	A	B	B	B	A	B	A	A	A	B	B	B	B	A	B	A	B	B	B	B	B	A	A	A	B	A	A	B	B	B	A	B	B	A	A	A	B	A	A	A	B	B	A
Chr5_bin1751	97120598	A	A	B	A	A	A	B	B	B	A	B	A	A	A	B	B	B	B	A	B	A	B	B	B	B	B	A	A	A	B	A	A	B	B	B	A	B	B	A	A	B	B	A	A	A	B	B	A
Chr5_bin1752	97335398	A	A	B	A	A	A	B	B	B	A	B	A	A	A	B	B	B	B	A	B	A	B	B	B	B	B	A	A	A	B	A	A	B	B	B	A	B	B	A	A	B	B	A	A	A	B	B	A
Chr5_bin1753	97354119	A	A	B	A	A	A	B	B	B	A	B	A	A	A	B	B	B	B	A	B	A	B	B	B	B	B	A	A	A	B	A	A	B	B	B	A	B	B	A	A	B	B	A	A	A	B	B	A
Chr5_bin1754	97615576	A	A	B	A	A	A	B	B	B	A	B	A	A	A	B	B	B	B	A	B	A	B	B	B	B	B	A	A	A	B	A	A	B	B	B	A	B	B	A	A	B	B	A	A	A	B	B	A
Chr5_bin1755	97732722	A	A	B	A	A	A	B	B	B	A	B	A	A	A	B	B	B	B	A	B	A	B	B	B	B	B	A	A	A	B	A	A	B	B	B	A	B	B	A	A	B	B	A	A	A	B	B	A
Chr5_bin1756	97797306	A	A	B	A	A	A	B	B	B	A	B	A	A	A	B	B	B	B	A	B	A	B	B	B	B	B	A	A	A	B	A	A	B	B	B	A	B	B	A	A	B	B	A	A	A	B	B	A
Chr5_bin1757	97945634	A	A	B	A	A	A	B	B	B	A	B	A	A	A	B	B	B	B	A	B	A	B	B	B	B	B	A	A	A	B	A	A	B	B	B	A	B	B	A	A	B	B	A	A	A	B	B	A
Chr5_bin1758	98009805	A	A	B	A	A	A	B	B	B	A	B	A	A	A	B	B	B	B	A	B	A	B	B	B	B	B	A	A	A	B	A	A	B	B	B	A	B	B	A	A	B	B	A	A	A	B	B	A
Chr5_bin1759	98113882	A	A	B	A	A	A	B	B	B	A	B	A	A	A	B	B	B	B	A	B	A	B	B	B	B	B	A	A	A	B	A	A	B	B	B	A	B	B	A	A	B	B	A	A	A	B	B	A
Chr5_bin1760	98189174	A	A	B	A	A	A	B	B	B	A	B	A	A	A	B	B	B	B	A	B	A	B	B	B	B	B	A	A	A	B	A	A	B	B	B	A	B	B	A	A	B	B	A	A	A	B	B	A
Chr5_bin1761	98346964	A	A	B	A	A	A	B	B	B	A	B	A	A	A	B	B	B	B	A	B	A	B	B	B	B	B	A	A	A	B	A	A	B	B	B	A	B	B	A	A	B	B	A	A	A	B	B	A
Chr5_bin1762	98430989	A	A	B	A	A	A	B	B	B	A	B	A	A	A	B	B	B	B	A	B	A	B	B	B	B	B	A	A	A	B	A	A	B	B	B	A	B	B	A	A	B	B	A	A	A	B	B	A
Chr5_bin1763	98548810	A	A	B	A	A	A	B	A	B	A	B	A	A	A	B	B	B	B	A	B	A	B	B	B	B	B	A	A	A	B	A	A	B	B	B	A	B	B	A	A	B	B	A	A	A	B	B	A
Chr5_bin1764	98633904	A	A	B	A	A	A	B	A	B	A	B	A	A	A	B	B	B	B	A	B	B	B	B	B	B	B	A	A	A	B	A	A	B	B	B	A	B	B	A	A	B	B	A	A	A	B	B	A
Chr5_bin1765	98702535	A	A	B	A	A	A	B	A	B	A	B	A	A	A	B	B	B	B	A	B	B	B	B	B	B	B	A	A	A	B	A	A	B	B	B	A	B	B	A	A	B	B	A	A	A	B	B	A
Chr5_bin1766	98812442	A	A	B	A	A	A	B	A	B	A	B	A	A	A	B	B	B	B	A	B	B	B	B	B	B	B	A	A	A	B	A	A	B	B	B	A	B	B	A	A	B	B	A	A	A	B	B	A
Chr5_bin1767	98884563	A	A	B	A	A	A	B	A	B	A	B	A	A	A	B	B	B	B	A	B	B	B	B	B	B	B	A	A	A	B	A	A	B	B	B	A	B	B	A	A	B	B	A	A	A	B	B	A
Chr5_bin1768	99025072	A	A	B	A	A	A	B	A	B	A	B	A	A	A	B	B	B	B	A	B	B	B	B	B	B	B	A	A	A	B	A	A	B	B	B	A	B	B	A	A	B	B	A	A	A	B	B	A
Chr5_bin1769	99110466	A	A	B	A	A	A	B	A	B	A	B	A	A	A	B	B	B	B	A	B	B	B	B	B	B	B	A	A	A	B	A	A	B	B	B	A	B	B	A	A	B	B	A	A	A	B	B	A
Chr5_bin1770	99234412	A	A	B	A	A	A	B	A	B	A	B	A	A	A	B	B	B	B	A	B	B	B	B	B	B	B	A	A	A	B	A	A	B	B	B	A	B	B	A	A	B	B	A	A	A	B	B	A
Chr5_bin1771	99252211	A	A	B	A	A	A	B	A	B	A	B	A	A	A	B	B	B	B	A	B	B	B	B	B	B	B	A	A	A	B	A	A	B	B	B	A	B	B	A	A	B	B	A	A	A	B	B	A
Chr5_bin1772	99524782	A	A	B	A	A	A	B	A	B	A	A	A	A	A	B	B	B	B	A	B	B	B	B	B	B	B	A	A	A	B	A	A	B	B	B	A	B	B	A	A	B	B	A	A	A	B	B	A
Chr5_bin1773	99644376	A	A	B	A	A	A	B	A	B	A	A	A	A	A	B	B	B	B	A	B	B	B	B	B	B	B	A	A	A	B	A	A	B	B	B	A	B	B	A	A	B	B	A	A	A	A	B	A
Chr5_bin1774	99724310	A	A	B	A	A	A	B	A	B	A	A	A	A	A	B	B	B	B	A	B	B	B	B	B	B	B	A	A	A	B	A	A	A	B	B	A	B	B	A	A	B	B	A	A	A	A	B	A
Chr5_bin1775	99762973	A	A	B	A	A	A	B	A	B	A	A	A	A	A	B	B	B	B	A	B	B	B	B	B	B	B	A	A	A	B	A	A	A	B	A	A	B	B	A	A	B	B	A	A	A	A	B	A
Chr5_bin1776	99939827	A	A	B	A	A	A	B	A	B	A	A	A	A	A	B	B	B	B	A	B	B	B	B	B	B	B	A	A	A	B	A	A	A	B	A	A	B	B	A	A	B	B	A	A	A	A	B	A
Chr5_bin1777	100143398	A	A	B	A	A	A	B	A	B	A	A	A	A	A	B	B	B	B	A	B	B	B	B	B	B	B	A	A	A	B	A	A	A	B	A	A	B	B	A	A	B	B	A	A	A	A	B	A
Chr5_bin1778	100722855	A	A	B	A	A	A	B	A	B	A	A	A	A	A	B	B	B	B	A	B	B	B	B	B	B	B	A	A	A	B	A	A	A	B	A	A	B	B	A	A	B	B	A	A	A	A	B	A
Chr5_bin1779	100849849	A	A	B	A	A	A	B	A	B	A	A	A	A	A	B	B	B	B	A	B	B	B	B	B	B	B	A	A	A	B	A	A	A	B	A	A	B	B	A	A	B	B	A	A	A	A	B	A
Chr5_bin1780	100882603	A	A	B	A	A	A	B	A	B	A	A	A	A	A	B	B	B	B	A	B	B	B	B	B	B	B	A	A	A	B	A	A	A	B	A	A	B	B	A	A	B	B	A	A	A	A	B	A
Chr5_bin1781	100965603	A	A	B	A	A	A	B	A	B	A	B	A	A	A	B	B	B	B	A	B	B	B	B	B	B	B	A	A	A	B	A	A	A	B	A	A	B	B	A	A	B	B	A	A	A	A	B	A
Chr5_bin1782	101091314	A	A	B	A	A	A	B	A	B	A	B	A	A	A	B	B	B	B	A	B	B	B	B	B	B	B	A	A	A	B	A	A	A	B	A	A	B	B	A	A	B	B	A	A	A	A	B	A
Chr5_bin1783	101179824	A	A	B	A	A	A	B	A	B	A	B	A	A	A	B	B	B	B	A	B	B	B	B	B	B	B	A	A	A	B	A	A	A	B	A	A	B	B	A	A	B	B	A	A	A	A	B	A
Chr5_bin1784	101332367	A	A	B	A	A	A	A	A	B	A	B	A	A	A	B	B	B	B	A	B	B	B	B	B	B	B	A	A	A	B	A	A	A	B	A	A	B	B	A	A	B	B	A	A	A	A	B	A
Chr5_bin1785	101401240	A	A	B	A	A	A	A	A	B	A	B	A	A	A	B	B	B	B	A	B	B	B	B	B	B	B	A	A	A	B	A	A	A	B	A	A	B	B	A	A	B	B	A	A	A	A	B	A
Chr5_bin1786	101681358	A	A	B	A	A	A	A	A	B	A	B	A	A	A	B	B	B	B	A	B	B	B	B	B	B	B	A	A	A	B	A	A	A	B	A	A	B	B	A	A	B	B	A	A	A	A	B	A
Chr5_bin1787	101847968	A	A	B	A	A	A	A	A	B	A	B	A	A	A	B	B	B	B	A	B	B	B	B	B	B	B	A	A	A	B	A	A	A	B	A	A	B	B	A	A	B	B	A	A	A	A	B	A
Chr5_bin1788	101904298	A	A	B	A	A	A	A	A	B	A	B	A	A	A	B	B	B	B	A	B	B	B	B	B	B	B	A	A	A	B	A	A	A	B	A	A	B	B	A	A	B	B	A	A	A	A	B	A
Chr5_bin1789	102012733	A	A	B	A	A	A	A	A	B	A	B	A	A	A	B	B	B	B	A	B	B	B	B	B	B	B	A	A	A	B	A	A	A	B	A	A	A	B	A	A	B	B	A	A	A	A	B	A
Chr5_bin1790	102480403	A	A	B	A	A	A	A	A	B	A	B	A	A	A	B	B	B	B	A	B	B	B	B	B	B	B	A	A	A	B	A	A	A	B	A	A	A	B	A	A	B	B	A	A	A	A	B	A
Chr5_bin1791	102645659	A	A	B	A	A	A	A	A	B	A	B	A	A	A	B	B	B	B	A	B	B	B	B	B	B	B	A	A	A	B	A	A	A	B	A	A	A	B	A	A	B	B	A	A	A	A	B	A
Chr5_bin1792	102714364	A	A	B	A	A	A	A	A	B	A	B	A	A	A	B	B	B	B	A	B	B	B	B	B	B	B	A	A	A	B	A	A	A	B	A	A	A	B	A	A	B	B	A	A	A	A	B	A
Chr5_bin1793	102819648	A	A	B	A	A	A	A	A	B	A	B	A	A	A	B	B	B	B	A	B	B	B	B	B	B	B	A	A	A	B	A	A	A	B	A	A	A	B	A	A	B	B	A	A	A	A	B	A
Chr5_bin1794	102945144	A	A	B	A	A	A	A	A	B	A	B	A	A	A	B	B	B	B	A	B	B	B	B	B	B	B	A	A	A	B	A	A	A	B	A	A	A	B	A	A	B	B	A	A	A	A	B	A
Chr5_bin1795	102954655	A	A	B	A	A	A	A	A	B	A	B	A	A	A	B	B	B	B	A	B	B	B	B	B	B	B	A	A	A	B	A	A	A	B	A	A	A	B	A	A	B	B	A	A	A	A	B	A
Chr5_bin1796	103096528	A	A	B	A	A	A	A	A	B	A	B	A	A	A	B	B	B	B	A	B	B	B	B	B	B	B	B	A	A	B	A	A	A	B	A	A	A	B	A	A	B	B	A	A	A	A	B	A
Chr5_bin1797	103209580	A	A	B	A	A	A	A	A	B	A	B	A	A	A	B	B	B	B	A	B	B	B	B	B	B	B	B	A	A	B	A	A	A	B	A	A	A	B	A	A	B	B	A	A	A	A	B	A
Chr5_bin1798	103319472	A	A	B	A	A	A	A	A	B	A	B	A	A	A	B	B	B	B	A	B	B	B	B	B	B	B	B	A	A	B	A	A	A	B	A	A	A	B	A	A	B	B	A	A	A	A	B	A
Chr5_bin1799	103410649	A	A	B	A	A	A	A	A	B	A	B	A	A	A	B	B	B	B	A	B	B	B	B	B	B	B	B	A	A	B	A	A	A	B	A	A	A	B	A	A	B	B	A	A	A	A	B	A
Chr5_bin1800	103510290	A	A	B	A	A	A	A	A	B	A	B	A	A	A	B	B	B	B	A	B	B	B	B	B	B	B	B	A	A	B	A	A	A	B	A	A	A	B	A	A	B	B	B	A	A	A	B	A
Chr5_bin1801	103829087	A	A	B	A	A	A	A	A	B	A	B	A	A	A	B	B	B	B	A	B	B	B	B	B	B	B	B	A	A	B	A	A	A	B	A	A	A	B	A	A	B	B	B	A	A	A	B	A
Chr5_bin1802	103937767	A	A	B	A	A	A	A	A	B	A	B	A	A	A	B	B	B	B	A	B	B	B	B	B	B	B	B	A	A	B	A	A	A	B	A	A	A	B	A	A	B	B	B	A	A	A	B	A
Chr5_bin1803	104000462	A	A	B	A	A	A	A	A	B	A	B	A	A	A	B	B	B	B	A	B	B	B	B	B	B	B	B	A	A	B	A	A	A	B	A	A	A	B	A	A	B	B	B	A	A	A	B	A
Chr5_bin1804	104148604	A	A	B	A	A	A	A	A	B	A	B	A	A	A	B	B	B	B	A	B	B	B	B	A	B	B	B	A	A	B	A	A	A	B	A	A	A	B	A	A	B	B	B	A	A	A	B	A
Chr5_bin1805	104218156	A	A	B	A	A	A	A	A	B	A	B	A	A	A	B	B	B	B	A	B	B	B	B	A	B	B	B	A	A	B	A	A	A	B	A	A	A	B	A	A	B	B	B	A	A	A	B	A
Chr5_bin1806	104932218	A	A	B	A	A	A	A	A	B	A	B	A	A	A	B	B	B	B	A	B	B	B	B	A	B	B	B	A	A	B	A	A	A	B	A	A	A	B	A	A	B	B	B	A	A	A	B	A
Chr5_bin1807	105122680	A	A	B	A	A	A	A	A	B	A	B	A	A	A	B	B	B	B	A	B	B	B	B	A	B	B	B	A	A	B	A	A	A	B	A	A	A	B	A	A	B	B	B	A	A	A	B	A
Chr5_bin1808	105215097	A	A	B	A	A	A	A	A	B	A	B	B	A	A	B	B	B	B	A	B	B	B	B	A	B	B	B	A	A	B	A	A	A	B	A	A	A	B	A	A	B	B	B	A	A	A	B	A
Chr5_bin1809	105333204	A	A	B	B	A	A	A	A	B	A	A	B	A	A	B	B	B	B	B	B	B	B	B	A	B	B	B	A	A	B	A	A	A	B	A	A	A	A	A	A	B	B	B	A	A	A	B	A
Chr5_bin1810	105384938	A	A	B	B	A	A	A	A	B	A	A	B	A	A	B	B	B	B	B	B	B	B	B	A	B	B	B	A	A	B	A	A	A	B	A	A	A	A	A	A	B	B	B	A	A	A	B	A
Chr5_bin1811	105518163	A	A	B	B	A	A	A	A	B	A	A	B	A	A	B	B	B	B	B	B	B	B	B	A	B	B	B	A	A	B	A	A	A	B	A	A	A	A	A	A	B	B	B	A	A	A	B	A
Chr5_bin1812	105557244	A	A	B	B	A	A	A	A	B	A	A	B	A	A	B	B	B	B	B	B	B	B	B	A	B	B	B	A	A	B	A	A	A	B	A	A	A	A	A	A	B	B	B	A	A	A	B	A
Chr5_bin1813	105707941	A	A	B	B	A	A	A	A	B	A	A	B	A	A	B	B	B	B	B	B	B	B	B	A	B	B	B	A	A	B	A	A	A	B	A	A	A	A	A	A	B	B	B	A	A	A	B	A
Chr5_bin1814	105786509	A	A	B	B	A	A	A	A	B	A	A	B	A	A	B	B	B	B	B	B	B	B	B	A	B	B	B	A	A	B	A	A	A	B	A	A	A	A	A	A	B	B	B	A	A	A	B	A
Chr5_bin1815	106087938	A	A	B	B	A	A	A	A	B	A	A	B	A	A	B	B	B	B	B	B	B	B	B	A	B	B	B	A	A	B	A	A	A	B	A	A	A	A	A	A	B	B	B	A	A	A	B	A
Chr5_bin1816	106247155	A	A	B	B	A	A	A	A	B	A	A	B	A	A	B	B	B	B	B	B	B	B	B	A	B	B	B	A	A	B	A	A	A	B	A	A	A	A	A	A	B	B	B	A	A	A	B	A
Chr5_bin1817	106293064	A	A	B	B	A	A	A	A	B	A	A	B	A	A	B	B	B	B	B	B	B	B	B	A	B	B	B	A	A	B	A	A	A	B	A	A	A	A	A	A	B	B	B	A	A	A	B	A
Chr5_bin1818	106507150	A	A	B	B	A	A	A	A	B	A	A	B	A	A	B	B	B	B	B	B	B	B	B	A	B	B	B	A	A	B	A	A	A	B	A	A	A	A	A	A	B	B	B	A	A	A	B	A
Chr5_bin1819	106636395	A	A	B	B	A	A	A	A	B	A	A	B	A	A	B	B	B	B	B	B	B	B	B	A	B	B	B	A	A	B	A	A	A	B	A	A	A	A	A	A	B	B	B	A	A	A	B	A
Chr5_bin1820	106842078	A	A	B	B	A	A	A	A	B	A	A	B	A	A	B	B	B	B	B	B	B	B	B	A	B	B	B	A	A	B	A	A	A	B	A	A	A	A	A	A	B	B	B	A	A	A	B	A
Chr5_bin1821	106868316	A	A	B	B	A	A	A	A	B	A	A	B	A	A	B	B	B	B	B	B	B	B	B	A	B	B	B	A	A	B	A	A	A	B	A	A	A	A	A	A	B	B	B	A	A	A	B	A
Chr5_bin1822	107066209	A	A	B	B	A	A	A	A	B	A	A	B	A	A	B	B	B	B	B	B	B	B	B	A	B	B	B	A	A	B	A	A	A	B	A	A	A	A	A	A	B	B	B	A	A	A	B	A
Chr5_bin1823	107208392	A	A	B	B	A	A	A	A	B	A	A	B	A	A	B	B	B	B	B	B	B	B	B	A	B	B	B	A	A	B	A	A	A	B	A	A	A	A	A	A	B	B	B	A	A	A	B	A
Chr5_bin1824	107335426	A	A	B	B	A	A	A	A	B	A	A	B	A	A	B	B	B	B	B	B	B	B	B	A	B	B	B	A	A	B	A	A	A	B	A	A	A	A	A	A	B	B	B	A	A	A	B	A
Chr5_bin1825	107449151	A	A	B	B	A	A	A	A	B	A	A	B	A	A	B	B	B	B	B	B	B	B	B	A	B	B	B	A	A	B	A	A	A	B	A	A	A	A	A	A	B	B	B	A	A	A	B	A
Chr5_bin1826	107542689	A	A	B	B	A	A	A	A	B	A	A	B	A	A	B	B	B	B	B	B	B	B	B	A	B	B	B	A	A	B	A	A	A	B	A	A	A	A	A	A	B	B	B	A	A	A	B	A
Chr5_bin1827	107617929	A	A	B	B	A	A	A	A	B	A	A	B	A	A	B	B	B	B	B	B	B	B	B	A	B	A	B	A	A	B	A	A	A	B	A	A	A	A	A	A	B	B	B	A	A	A	B	A
Chr5_bin1828	107741039	A	A	B	B	A	A	A	A	B	A	A	B	A	A	B	B	B	B	B	B	B	B	B	A	B	A	B	A	A	B	A	A	A	B	B	A	A	A	A	A	B	B	B	A	A	A	B	A
Chr5_bin1829	107838648	A	A	B	B	A	A	A	A	B	A	A	B	A	A	B	B	B	B	B	B	B	B	B	A	B	A	B	A	A	B	A	A	A	B	B	A	A	A	B	A	B	B	B	A	A	A	B	A
Chr5_bin1830	107857675	A	A	B	B	A	A	A	A	B	A	A	B	A	A	B	B	B	B	B	B	B	B	B	B	B	A	B	A	A	B	A	A	A	B	B	A	A	A	B	A	B	B	B	A	A	A	B	A
Chr5_bin1831	107978353	A	A	B	B	A	A	A	A	B	A	A	B	A	A	B	B	B	B	B	B	B	B	B	B	B	A	B	A	A	B	A	A	A	B	B	A	A	A	B	A	B	B	B	A	A	A	B	A
Chr5_bin1832	108059604	A	A	B	B	A	A	A	A	B	A	A	B	A	A	B	B	B	B	B	B	B	B	B	B	B	A	B	A	A	B	A	A	A	B	B	A	A	A	B	A	B	B	B	A	A	A	B	A
Chr5_bin1833	108217626	A	A	B	B	A	A	A	A	B	A	A	B	A	A	B	B	B	B	B	B	B	B	B	B	B	A	B	A	A	B	A	A	A	B	B	A	A	A	B	A	B	B	B	A	A	A	B	A
Chr5_bin1834	108454640	A	A	B	A	A	A	A	A	B	A	A	B	A	A	B	B	B	B	B	B	B	B	B	B	B	A	B	A	A	B	A	A	A	B	B	A	A	A	B	A	B	B	B	A	A	A	B	A
Chr5_bin1835	108555063	A	A	B	A	A	A	A	A	B	A	A	B	A	A	B	B	B	B	B	B	B	B	B	B	B	A	B	A	A	B	A	A	A	B	B	A	A	A	B	A	B	B	B	A	A	A	B	A
Chr5_bin1836	109015393	A	A	B	A	A	A	A	A	B	A	A	B	A	A	B	B	B	B	B	B	B	B	B	B	B	A	B	A	A	B	A	A	A	B	B	A	A	A	B	A	B	B	B	A	A	A	B	A
Chr5_bin1837	109074647	A	A	B	A	A	A	A	A	B	A	A	B	A	A	B	B	B	B	B	B	B	B	B	B	B	A	B	A	A	B	A	A	A	B	B	A	A	A	B	A	B	B	B	A	A	A	B	A
Chr5_bin1838	109240094	A	A	B	A	A	A	A	A	B	A	A	B	A	A	B	B	B	B	B	B	B	B	B	B	B	A	B	A	A	B	A	A	A	B	B	A	A	A	B	A	B	B	B	A	A	A	B	A
Chr5_bin1839	109431315	A	A	B	A	A	A	A	A	B	A	A	B	A	A	B	B	B	B	B	B	B	B	B	B	B	A	B	A	A	B	A	A	A	B	B	A	A	A	B	A	B	B	B	A	A	A	B	A
Chr5_bin1840	109464163	A	A	B	A	A	A	A	A	B	A	A	B	A	A	B	B	B	B	B	B	B	B	B	B	B	A	B	A	A	B	A	A	A	B	B	A	A	A	B	A	B	B	B	A	A	A	B	A
Chr5_bin1841	109574508	A	A	B	A	A	A	A	A	A	A	A	B	A	A	B	B	B	B	B	B	B	B	B	B	B	A	B	A	A	B	A	A	A	B	B	A	A	A	B	A	B	B	B	A	A	A	B	A
Chr5_bin1842	109742835	A	A	B	A	A	A	A	A	A	A	A	B	A	A	B	B	B	B	B	B	B	B	B	B	B	A	B	A	A	B	A	A	A	B	B	A	A	A	B	A	B	B	B	A	A	A	B	A
Chr5_bin1843	109820858	A	A	B	A	A	A	A	A	A	A	A	B	A	A	B	B	B	B	B	B	B	B	B	B	B	A	B	A	A	B	A	A	A	B	B	A	A	A	B	A	B	B	B	A	A	A	B	A
Chr5_bin1844	110115869	A	A	B	A	A	A	A	A	A	A	A	B	A	A	B	B	B	B	B	B	B	B	B	B	B	A	B	A	A	B	A	A	A	B	B	A	A	A	B	A	B	B	B	A	A	A	B	A
Chr5_bin1845	110228120	A	A	B	A	A	A	A	A	A	A	A	B	A	A	B	B	B	B	B	B	A	B	B	B	B	A	B	A	A	B	A	A	A	B	B	A	A	A	B	A	B	B	B	A	A	A	B	A
Chr5_bin1846	110346280	A	A	B	A	A	A	A	A	A	A	A	B	A	A	B	B	B	B	B	B	A	B	B	B	B	A	B	A	A	B	A	A	A	B	B	A	A	A	B	A	B	B	B	A	A	A	B	A
Chr5_bin1847	110403584	A	A	B	A	A	A	A	A	A	A	A	B	A	A	B	B	B	B	B	B	A	B	B	B	B	A	B	A	A	B	A	A	A	B	B	A	A	A	B	A	B	B	B	A	A	A	B	A
Chr5_bin1848	110494589	A	A	B	A	A	A	A	A	A	A	A	B	A	A	B	B	B	B	B	B	A	B	B	B	B	A	B	A	A	B	A	A	A	B	B	A	A	A	B	A	B	B	B	A	A	A	B	A
Chr5_bin1849	110582554	A	A	A	A	A	A	A	A	A	A	A	B	A	A	B	B	B	B	B	B	A	B	B	B	B	A	B	A	A	B	A	A	A	B	B	A	A	A	B	A	B	B	B	A	A	A	B	A
Chr5_bin1850	110730404	A	A	A	A	A	A	A	A	A	A	A	B	A	A	B	B	B	B	B	B	A	B	B	B	B	A	B	A	A	B	A	A	A	B	B	A	A	A	B	A	B	B	B	A	A	A	B	A
Chr5_bin1851	110847128	A	A	A	A	A	A	A	A	A	A	A	B	A	A	B	B	B	B	B	A	A	B	B	B	B	A	B	A	A	B	A	A	A	B	B	A	A	A	B	A	B	B	B	A	A	A	B	A
Chr5_bin1852	110985544	A	A	A	A	A	A	A	A	A	A	A	B	A	A	B	B	B	B	B	A	A	B	B	B	B	A	B	A	A	B	A	A	A	B	B	A	A	A	B	A	B	B	B	A	A	A	B	A
Chr5_bin1853	111086836	A	A	A	A	A	A	A	A	A	A	A	B	A	A	B	B	B	B	B	A	A	B	B	B	B	A	B	A	A	B	A	A	A	B	B	A	A	A	B	A	B	B	B	A	A	A	B	A
Chr5_bin1854	111196350	A	A	A	A	A	A	A	A	A	A	A	B	A	A	B	B	B	B	B	A	A	B	B	B	B	A	B	A	A	B	A	A	A	B	B	A	A	A	A	A	B	B	B	A	A	A	B	A
Chr5_bin1855	111534609	A	A	A	A	A	A	A	A	A	A	A	B	A	A	B	B	B	B	B	A	A	B	B	B	B	A	B	A	A	B	A	A	A	B	B	A	A	A	A	A	B	B	B	A	A	A	B	A
Chr5_bin1856	111635855	A	A	A	A	A	A	A	A	A	A	A	B	A	A	B	B	B	B	B	A	A	B	B	B	B	A	B	A	A	B	A	A	A	B	B	A	A	A	A	A	B	B	B	A	A	A	B	A
Chr5_bin1857	111745157	A	A	A	A	A	A	A	A	A	A	A	B	A	A	B	B	B	B	B	A	A	B	B	B	B	A	B	A	A	B	A	A	A	A	B	A	A	A	A	A	B	B	B	A	A	A	B	A
Chr5_bin1858	111797775	A	A	A	A	A	A	A	A	A	A	A	B	A	A	B	B	B	B	B	A	A	B	B	B	B	A	B	A	A	B	A	A	A	A	B	A	A	A	A	A	B	B	B	A	A	A	B	A
Chr5_bin1859	111936879	A	A	A	A	A	A	A	A	A	A	A	B	A	A	B	B	B	B	B	A	A	B	B	B	B	A	B	A	A	B	A	A	A	A	B	A	A	A	A	A	B	B	B	A	A	A	B	A
Chr5_bin1860	112044511	A	A	A	B	A	A	A	A	A	A	A	B	A	A	B	B	B	B	B	A	B	B	B	B	B	A	B	A	A	B	A	A	A	A	B	A	A	A	A	A	B	B	B	A	A	A	B	A
Chr5_bin1861	112142163	A	A	A	B	A	A	A	A	A	A	A	B	A	A	B	B	B	B	B	A	B	B	B	B	B	A	B	A	A	B	A	A	A	A	B	A	A	A	A	A	B	B	B	A	A	A	B	A
Chr5_bin1862	112248288	A	A	A	B	A	A	A	A	A	A	A	B	A	A	B	B	B	B	B	A	B	B	B	B	B	A	B	A	A	B	A	A	A	A	B	A	A	A	A	A	B	B	B	A	A	A	B	A
Chr5_bin1863	112313267	A	A	A	B	A	A	A	A	A	A	A	B	A	A	B	B	B	B	B	A	B	B	B	B	B	A	B	A	A	B	A	A	A	A	B	A	A	A	A	A	B	B	B	A	A	A	B	A
Chr5_bin1864	112515659	A	A	A	B	A	A	A	A	A	A	A	B	A	B	B	B	B	B	B	A	B	B	B	B	B	A	B	A	A	B	A	A	A	A	B	A	A	A	A	A	B	B	B	A	A	A	B	A
Chr5_bin1865	112625657	A	A	A	B	A	A	A	A	A	A	A	B	A	B	B	B	B	B	B	A	B	B	B	B	B	A	B	A	A	B	A	A	A	A	B	A	A	A	A	A	B	B	B	A	A	A	B	A
Chr5_bin1866	112740391	A	A	A	B	A	A	A	A	A	A	A	B	A	B	B	B	B	B	B	A	B	B	B	B	B	A	B	A	A	B	B	A	A	A	B	A	A	A	A	A	B	B	B	A	A	A	B	A
Chr5_bin1867	112754620	A	A	B	B	A	B	A	A	A	A	A	B	A	B	B	B	B	B	B	A	B	B	B	B	B	B	B	A	A	B	B	A	A	A	B	A	A	A	A	A	B	B	B	A	A	B	B	A
Chr5_bin1868	112935095	A	A	B	B	A	B	A	A	A	A	A	B	A	B	B	B	B	B	B	A	B	B	B	B	B	B	B	A	A	B	B	A	A	A	B	A	A	A	A	A	B	B	B	A	A	B	B	A
Chr5_bin1869	112990382	A	A	B	B	A	B	A	A	A	A	A	B	A	B	B	B	B	B	B	A	B	B	B	B	B	B	B	A	A	B	B	A	A	A	B	A	A	A	A	A	B	B	B	A	A	B	B	A
Chr5_bin1870	113128970	A	A	B	B	A	B	A	A	A	A	A	B	A	B	B	B	B	B	B	A	B	B	B	B	B	B	B	A	A	B	B	A	A	A	B	B	A	A	A	A	B	B	B	A	A	B	B	A
Chr5_bin1871	113234163	A	A	B	B	A	B	A	A	A	A	A	B	A	B	B	B	B	B	B	A	B	B	B	B	B	B	B	A	A	B	B	A	A	A	B	B	A	A	A	A	B	B	B	A	A	B	B	A
Chr5_bin1872	113347612	A	A	B	B	A	B	A	A	A	A	A	B	A	B	B	B	B	B	B	A	B	B	B	B	B	B	B	A	A	B	B	A	A	A	B	B	A	A	A	A	B	B	B	A	A	B	B	A
Chr5_bin1873	113446357	A	A	B	B	A	B	A	A	A	A	A	B	A	B	B	B	B	B	B	A	B	B	B	B	B	A	B	A	A	B	B	A	A	A	B	B	A	A	A	A	B	B	B	A	A	B	B	A
Chr5_bin1874	113461341	A	A	B	B	A	B	A	A	A	A	A	B	A	B	B	B	B	B	B	A	B	B	B	B	B	A	B	A	A	B	B	A	A	A	B	B	A	A	A	A	B	B	B	A	A	B	B	A
Chr5_bin1875	113624805	A	A	B	B	A	B	A	A	A	A	A	B	A	B	B	B	B	B	B	A	B	B	B	B	B	A	B	A	A	B	B	A	A	A	B	B	A	A	A	A	B	B	B	A	A	B	B	A
Chr5_bin1876	113693383	A	A	B	B	A	B	A	A	A	A	A	B	A	B	B	B	B	B	B	A	B	B	B	B	B	A	B	A	A	B	B	A	A	A	B	B	A	A	A	A	B	B	B	A	A	B	B	A
Chr5_bin1877	113825983	A	A	B	B	A	B	A	A	A	A	A	B	A	B	B	B	B	B	B	A	B	B	B	B	B	A	B	A	A	B	B	A	A	A	B	B	A	A	A	A	B	B	B	A	A	B	B	B
Chr5_bin1878	113904991	A	A	B	B	A	B	A	A	A	A	A	B	A	B	B	B	B	B	B	A	B	B	B	B	B	A	B	A	A	B	B	A	A	A	B	B	A	A	A	A	B	B	B	A	A	B	B	B
Chr5_bin1879	114046089	A	A	B	B	A	B	A	A	A	A	A	B	A	B	B	B	B	B	B	A	B	B	B	B	B	A	B	A	A	B	B	A	A	A	B	B	A	A	A	A	B	B	B	A	A	B	B	B
Chr5_bin1880	114240635	A	A	A	B	A	B	A	A	A	A	A	B	A	B	B	B	B	B	B	A	B	B	B	B	B	A	B	A	A	B	B	A	A	A	B	B	A	A	A	A	B	B	B	A	A	B	B	B
Chr5_bin1881	114317404	A	A	A	B	A	B	A	A	A	A	A	B	A	B	B	B	B	B	B	A	B	B	B	B	B	A	B	A	A	B	B	A	A	A	A	B	A	A	A	A	B	B	B	A	A	B	B	B
Chr5_bin1882	114426505	A	A	A	B	A	B	A	A	A	A	A	B	A	B	B	B	B	B	B	A	B	B	B	B	B	A	B	A	A	B	B	A	A	A	A	B	A	A	A	A	A	B	B	A	A	B	B	B
Chr5_bin1883	114483007	A	A	B	B	A	B	A	A	A	A	A	B	A	B	B	B	B	B	B	A	B	B	B	B	B	A	B	A	A	B	B	A	A	A	A	B	A	A	A	H	A	B	B	A	A	B	B	B
Chr5_bin1884	114627943	A	A	B	B	A	B	A	A	A	A	A	B	A	B	B	B	B	B	B	A	B	B	B	B	B	A	B	A	A	B	B	A	A	A	A	B	A	A	A	H	A	B	B	A	A	B	B	B
Chr5_bin1885	114773007	A	A	B	B	A	B	A	A	A	A	A	B	A	B	B	B	B	B	B	A	B	B	B	B	B	A	B	A	A	B	B	A	A	A	A	B	A	A	A	H	A	B	B	A	A	B	B	B
Chr5_bin1886	114932986	A	A	B	B	A	B	A	A	A	A	A	B	A	B	B	B	B	B	B	A	B	B	B	B	B	A	B	A	A	B	B	A	A	A	A	B	A	A	A	H	A	B	B	A	A	B	B	B
Chr5_bin1887	115131918	A	A	B	B	A	B	A	A	A	A	A	B	A	B	B	B	B	B	B	A	B	B	B	B	B	A	B	A	A	B	B	A	A	A	A	B	A	A	A	H	A	B	B	A	A	B	B	B
Chr5_bin1888	115193790	A	A	B	B	A	B	A	A	A	A	A	B	A	A	B	B	B	B	B	A	B	B	B	B	B	A	B	A	A	B	B	A	A	A	A	B	A	A	A	H	A	B	B	A	A	A	B	B
Chr5_bin1889	115310961	A	A	B	B	A	B	A	A	A	A	A	B	A	A	B	B	B	B	B	A	B	B	B	B	A	A	B	A	A	B	B	A	A	A	A	B	A	A	A	H	A	B	B	A	A	A	B	B
Chr5_bin1890	115400607	A	A	B	B	A	B	A	A	A	A	A	B	A	A	B	B	B	B	B	A	B	B	B	B	A	A	B	A	A	B	B	A	A	A	A	B	A	A	A	H	A	B	B	A	A	A	B	B
Chr5_bin1891	115458284	A	A	B	B	A	B	A	A	A	A	A	B	A	A	B	B	B	B	B	A	B	B	B	B	A	A	B	A	A	B	B	A	A	A	A	B	A	A	A	H	A	B	B	A	A	A	B	B
Chr5_bin1892	115645656	A	A	B	B	A	B	A	A	A	A	A	B	A	A	B	B	B	B	B	A	B	B	B	B	A	A	B	A	A	B	B	A	A	A	A	B	A	A	A	H	A	B	B	A	A	A	B	B
Chr5_bin1893	115785414	A	A	B	B	A	B	A	A	A	A	A	B	A	A	B	B	B	B	B	A	B	B	B	B	A	A	B	A	A	B	B	A	A	A	A	B	A	A	A	H	A	B	B	A	A	A	B	B
Chr5_bin1894	115930344	A	A	B	B	A	B	A	A	A	A	A	B	A	A	B	B	B	B	B	A	B	B	B	B	A	A	B	A	A	B	B	A	A	A	A	B	A	A	A	H	A	B	B	A	A	A	B	B
Chr6_bin1895	523947	A	B	B	B	A	B	B	A	A	A	A	B	A	B	B	A	A	A	B	A	A	A	A	A	A	A	B	B	B	B	B	A	B	A	A	A	B	A	A	B	B	B	A	B	B	A	B	A
Chr6_bin1896	596299	A	B	B	B	A	B	B	A	A	A	A	B	A	B	B	A	A	A	B	A	A	A	A	A	A	A	B	B	B	B	B	A	B	A	A	A	A	A	A	B	B	B	A	B	B	A	B	A
Chr6_bin1897	729912	A	B	B	B	A	B	B	A	A	A	A	B	A	B	B	A	A	A	B	A	A	A	A	A	A	A	B	B	B	B	B	A	B	A	A	A	A	A	A	B	B	B	A	B	B	A	B	A
Chr6_bin1898	841999	A	B	B	B	A	B	B	A	A	A	A	B	A	B	B	A	A	A	B	A	A	A	A	B	B	A	B	B	B	B	B	A	B	A	A	A	A	A	A	B	B	B	A	B	B	A	B	A
Chr6_bin1899	850286	A	B	B	B	A	B	B	A	A	A	A	B	A	B	A	A	A	A	B	A	A	A	A	B	B	A	B	B	B	B	B	A	B	A	A	A	A	A	A	B	B	B	A	B	B	B	B	A
Chr6_bin1900	1044026	A	B	B	B	A	B	B	A	A	A	A	B	A	B	A	A	A	A	B	A	A	A	A	B	B	A	B	B	B	B	B	A	B	A	A	A	A	A	A	B	B	B	A	B	B	B	B	A
Chr6_bin1901	1122007	A	B	B	B	A	B	B	A	A	A	A	B	A	B	A	A	A	A	B	A	A	A	A	B	B	A	B	B	B	B	B	A	B	A	A	A	A	A	A	B	B	B	A	B	B	B	B	A
Chr6_bin1902	1245955	A	B	B	B	A	B	B	A	A	A	A	B	A	B	A	A	A	A	B	A	A	A	A	B	B	A	B	B	B	B	B	A	B	A	A	A	A	A	A	B	B	B	A	B	B	B	B	A
Chr6_bin1903	1345591	A	B	B	B	A	A	B	A	A	A	A	B	A	B	A	A	A	A	B	A	A	A	A	B	B	A	B	B	B	B	B	A	B	A	A	A	B	A	A	B	B	B	A	B	B	B	B	A
Chr6_bin1904	1423839	A	B	B	B	A	A	B	A	A	A	A	B	A	B	A	A	A	A	B	A	B	A	A	B	B	A	B	B	B	B	B	A	B	A	A	A	B	A	A	B	B	B	A	B	B	B	B	A
Chr6_bin1905	1544314	A	B	B	B	A	A	A	A	A	A	A	B	A	B	A	A	A	A	A	A	B	A	A	B	B	A	B	B	B	B	B	A	B	A	A	A	B	A	B	B	B	B	A	B	B	B	B	A
Chr6_bin1906	1642452	A	B	B	B	A	A	A	A	A	A	A	B	A	B	A	A	A	A	A	A	B	A	A	B	B	A	B	B	B	B	B	A	B	A	A	A	B	A	B	B	B	B	A	B	B	B	B	A
Chr6_bin1907	1727820	B	B	B	B	A	A	A	A	A	A	A	B	A	B	A	A	A	A	A	A	B	A	A	B	B	A	B	A	B	B	B	A	B	A	A	A	B	A	B	B	B	B	A	A	B	B	B	A
Chr6_bin1908	1839809	B	B	B	B	A	A	A	A	A	A	A	B	A	B	A	A	A	A	A	A	B	A	A	B	B	A	B	A	B	B	B	A	B	A	A	A	B	A	B	B	B	B	A	A	B	B	B	A
Chr6_bin1909	1944910	B	B	B	B	A	A	B	A	A	A	A	B	A	B	A	A	A	A	A	A	B	A	A	B	B	A	B	A	B	B	B	A	B	A	A	A	B	A	B	B	B	B	A	A	B	B	B	A
Chr6_bin1910	2040402	B	B	B	B	A	A	B	A	A	A	A	B	A	B	A	A	A	A	B	A	B	A	A	B	B	B	B	A	B	B	B	A	B	A	A	A	B	A	B	B	B	B	A	A	B	B	B	A
Chr6_bin1911	2140558	B	B	B	B	A	A	B	A	A	A	A	B	A	B	A	A	A	A	B	A	B	A	A	B	A	B	B	A	B	B	B	A	B	A	A	A	B	A	B	B	B	B	A	A	B	B	B	A
Chr6_bin1912	2245610	B	B	B	B	A	A	B	A	A	A	A	B	A	B	A	A	A	A	B	A	B	A	A	B	A	B	B	A	B	B	B	A	B	A	A	A	B	A	B	B	B	B	A	A	B	B	B	A
Chr6_bin1913	2297303	B	B	B	B	A	A	B	A	A	A	A	B	A	B	A	A	A	A	B	A	B	A	A	B	A	B	B	A	B	B	B	A	B	A	A	A	B	A	B	B	B	B	A	A	B	B	B	A
Chr6_bin1914	2352958	B	B	B	B	A	A	B	A	A	A	A	B	A	B	A	A	A	A	B	A	B	A	A	B	A	B	B	A	B	B	B	A	B	A	A	A	B	A	B	B	B	B	A	A	B	B	A	A
Chr6_bin1915	2544609	B	B	B	B	A	A	B	A	A	A	A	B	A	B	A	A	A	A	B	A	B	A	A	B	A	B	B	A	B	B	B	A	B	A	A	A	B	A	B	B	B	B	A	A	B	B	A	A
Chr6_bin1916	2743640	B	B	B	B	A	A	B	A	A	A	A	B	A	B	A	A	A	A	B	A	B	A	A	B	A	B	B	B	B	A	B	A	B	A	A	A	B	A	B	B	B	B	A	A	B	B	A	A
Chr6_bin1917	2821365	B	B	B	B	A	A	B	A	A	A	A	B	A	B	A	A	A	A	B	A	B	A	A	B	A	B	B	B	B	A	B	A	B	A	A	A	B	A	B	B	B	B	A	A	B	B	A	A
Chr6_bin1918	2917890	B	B	B	B	A	A	B	A	A	A	A	B	A	B	A	A	A	A	B	A	B	A	A	B	A	B	B	B	B	A	B	A	B	A	A	A	B	A	B	B	B	B	A	A	B	B	A	A
Chr6_bin1919	2966234	B	B	B	B	A	A	B	A	A	A	A	B	A	B	A	A	A	A	B	A	B	A	A	B	A	B	B	B	B	A	B	A	B	A	A	A	B	A	B	B	B	B	A	A	B	B	A	A
Chr6_bin1920	3115344	B	B	B	B	A	A	B	A	A	A	A	B	A	B	A	A	A	A	B	A	B	A	A	B	A	B	B	B	B	A	B	A	B	A	A	A	B	A	B	B	B	B	A	A	B	B	A	A
Chr6_bin1921	3179193	B	B	B	B	A	A	B	A	A	A	A	B	A	B	A	A	A	A	B	A	B	A	A	B	A	B	B	B	B	A	B	A	B	A	A	A	B	A	B	B	B	B	B	A	B	B	A	A
Chr6_bin1922	3349597	B	B	B	B	A	A	B	A	A	A	A	B	A	B	A	A	A	A	B	A	B	A	A	B	A	B	B	B	B	A	B	A	B	A	A	A	B	A	B	B	B	B	B	A	B	B	A	A
Chr6_bin1923	3448140	B	B	B	B	A	A	B	A	A	A	A	B	A	B	A	A	A	A	B	A	B	A	A	B	A	B	B	B	B	A	B	A	B	A	A	A	B	A	B	B	B	A	B	A	B	A	A	A
Chr6_bin1924	3482769	B	B	B	B	A	A	B	A	A	A	A	B	A	B	A	A	A	A	B	A	B	A	A	B	A	B	B	B	B	A	B	A	B	A	A	A	B	A	B	B	B	A	B	A	B	A	B	A
Chr6_bin1925	3605261	B	B	B	B	A	A	B	A	A	A	A	B	A	B	A	A	A	A	B	A	B	A	A	B	A	B	B	B	B	A	B	A	B	A	A	A	B	A	B	B	B	A	B	A	B	A	B	A
Chr6_bin1926	3748201	B	B	B	B	A	A	B	A	A	A	A	B	A	B	A	A	A	A	B	A	B	A	A	B	A	B	B	B	B	A	B	A	B	A	A	A	B	A	B	B	B	A	B	A	B	A	B	A
Chr6_bin1927	3815653	B	B	B	B	A	A	B	A	A	A	A	B	A	A	A	A	A	A	B	A	B	A	A	B	A	B	B	B	B	A	B	A	B	A	A	A	B	A	B	B	B	B	B	A	B	A	B	A
Chr6_bin1928	3875317	B	B	B	B	A	A	B	A	A	A	A	B	A	A	A	A	A	A	B	A	B	A	A	B	A	B	B	B	B	A	B	A	B	A	A	A	B	A	B	B	B	B	B	A	B	A	B	A
Chr6_bin1929	4047542	B	B	B	B	A	A	B	A	A	A	A	B	A	A	A	A	A	A	B	A	B	A	A	B	A	B	B	B	B	A	B	A	B	A	A	A	B	A	B	B	B	B	B	A	B	A	B	A
Chr6_bin1930	4123603	B	B	B	B	A	A	B	A	A	A	A	B	A	A	A	A	A	A	B	A	B	A	A	B	A	B	B	B	B	A	B	A	B	A	A	A	B	A	B	B	B	B	B	A	B	A	B	A
Chr6_bin1931	4205696	B	B	B	B	A	A	B	A	A	A	A	B	A	A	A	A	A	A	B	A	B	A	A	B	A	B	B	B	B	A	B	A	B	A	A	A	B	A	B	B	B	B	B	B	B	A	B	B
Chr6_bin1932	4348387	B	B	B	B	A	A	B	A	A	A	A	B	A	A	A	A	A	A	B	A	B	A	A	B	A	B	B	B	B	A	B	A	B	A	A	A	B	A	B	B	B	B	B	B	B	A	B	B
Chr6_bin1933	4439191	B	B	B	B	A	A	B	A	A	A	A	B	A	A	A	A	A	A	B	A	B	A	A	B	A	B	B	B	B	A	B	A	B	A	A	A	B	A	B	B	B	B	B	B	B	A	B	B
Chr6_bin1934	4519388	B	B	B	B	A	A	B	A	A	A	A	B	A	A	A	A	A	A	B	A	B	A	A	B	A	B	B	B	B	A	B	A	B	A	A	A	B	A	B	B	B	A	B	B	B	A	B	B
Chr6_bin1935	4630117	B	B	B	B	A	A	B	A	A	A	A	B	A	A	A	A	A	A	B	A	B	A	A	B	A	B	B	B	B	A	B	A	B	A	A	A	B	A	B	B	B	A	B	B	B	A	B	B
Chr6_bin1936	4719988	B	B	B	B	A	A	B	A	A	A	A	B	A	A	A	A	A	A	B	A	B	A	A	B	A	B	B	B	B	A	B	A	B	A	A	A	B	A	B	B	B	A	B	B	B	A	B	B
Chr6_bin1937	4841452	B	B	B	B	A	A	B	A	A	A	A	B	A	A	A	A	A	A	B	A	B	A	A	B	A	B	B	B	B	A	B	A	B	A	A	A	B	A	B	B	B	A	B	B	B	A	B	B
Chr6_bin1938	4906743	B	B	B	B	A	A	B	A	A	A	A	B	A	A	A	A	A	A	B	A	B	A	A	B	A	B	B	B	B	A	B	A	B	A	A	A	B	A	B	B	B	A	B	B	B	A	B	B
Chr6_bin1939	5035667	B	B	B	B	A	A	B	A	A	A	A	B	A	A	A	A	A	A	B	A	B	A	A	B	A	B	B	B	B	A	B	A	B	A	A	A	B	A	B	B	B	A	B	B	B	A	B	B
Chr6_bin1940	5119932	B	B	B	B	A	A	B	A	A	A	A	B	A	A	A	A	A	A	B	A	B	A	A	B	A	B	B	B	B	A	B	A	B	A	A	A	B	A	B	B	B	A	B	B	B	A	B	B
Chr6_bin1941	5238875	A	B	B	B	A	A	B	A	A	A	A	B	A	A	A	A	A	A	B	A	B	A	A	B	A	B	B	B	B	B	B	A	B	A	A	A	B	A	B	A	B	A	B	B	B	A	B	B
Chr6_bin1942	5344620	A	B	B	B	A	A	B	A	A	A	A	B	A	A	A	A	A	A	B	A	B	A	A	B	A	B	B	B	B	B	B	A	B	A	A	A	B	A	B	A	B	A	B	B	B	A	B	B
Chr6_bin1943	5400996	A	B	B	B	A	A	B	A	A	A	B	B	A	A	A	A	A	A	B	A	B	A	A	B	A	B	B	B	B	B	B	A	B	A	A	A	B	A	B	A	B	A	B	B	B	A	B	B
Chr6_bin1944	5502298	A	B	B	B	A	A	B	A	A	A	B	B	A	A	A	A	A	A	B	A	B	A	A	B	A	B	B	B	B	B	B	A	B	A	A	A	B	A	B	A	B	A	B	B	B	A	B	B
Chr6_bin1945	5640647	A	B	B	B	A	A	B	A	A	A	B	B	A	A	A	A	A	A	B	A	B	A	A	B	A	B	B	B	B	B	B	A	B	A	A	A	B	A	B	A	B	A	B	B	B	A	B	B
Chr6_bin1946	5743753	A	B	B	B	A	A	B	A	A	A	B	B	A	A	A	A	A	A	B	A	B	A	A	B	A	B	A	B	B	B	B	A	B	A	A	A	B	A	B	A	B	A	B	B	B	A	B	B
Chr6_bin1947	5804432	A	B	B	B	A	A	B	A	A	A	B	B	A	A	A	A	A	A	B	A	B	A	A	B	A	B	A	B	B	B	B	A	B	A	A	A	B	A	B	A	B	A	B	B	B	A	B	B
Chr6_bin1948	5863565	A	B	B	B	A	A	B	A	A	A	B	B	A	A	A	A	A	A	B	A	B	A	A	B	A	B	A	B	B	B	B	A	B	A	A	A	B	A	B	A	B	A	B	B	B	A	B	B
Chr6_bin1949	5996836	A	B	B	B	A	A	B	A	A	A	B	B	A	A	A	A	A	A	B	A	B	A	A	B	A	B	A	B	B	B	B	A	B	A	A	A	B	A	B	A	B	A	B	B	B	A	B	B
Chr6_bin1950	6110638	A	B	B	B	A	A	B	A	A	A	B	B	A	A	A	A	A	A	B	A	B	A	A	B	A	B	A	B	B	B	B	A	B	A	A	A	B	A	B	A	B	A	B	B	B	A	B	B
Chr6_bin1951	6246160	A	B	B	B	A	A	B	A	A	A	B	B	A	A	A	A	A	A	B	A	B	A	A	B	A	B	A	B	B	B	B	A	B	A	A	A	B	A	B	A	B	A	B	B	B	A	B	B
Chr6_bin1952	6339107	A	B	B	B	A	A	B	A	A	A	B	B	A	A	A	A	A	A	B	A	B	A	A	B	A	B	A	B	B	B	B	A	B	A	A	A	B	A	B	A	B	A	B	B	B	A	B	B
Chr6_bin1953	6435921	A	B	B	B	A	A	B	A	A	A	B	B	A	A	A	A	A	A	B	A	B	A	A	B	A	B	A	B	B	B	B	A	B	A	A	A	B	A	B	A	B	A	A	B	B	A	B	B
Chr6_bin1954	6454562	A	B	B	B	A	A	B	A	A	A	B	B	A	A	A	A	A	A	B	A	B	A	A	B	A	B	A	B	B	B	B	A	B	A	A	A	B	A	B	A	B	A	A	B	B	A	B	B
Chr6_bin1955	6614153	A	B	B	B	A	A	B	A	A	A	B	B	A	A	A	A	A	A	B	A	B	A	A	B	A	B	A	B	B	B	B	A	B	A	A	A	B	A	B	A	B	A	A	B	B	A	B	B
Chr6_bin1956	6736291	A	B	B	B	A	A	B	A	A	A	B	B	A	A	A	A	A	A	B	A	B	A	A	B	A	B	A	B	B	B	B	A	B	A	A	A	B	A	B	A	B	A	A	B	B	A	B	B
Chr6_bin1957	6842671	A	B	B	B	A	A	B	A	A	A	B	B	A	A	A	A	A	A	B	A	B	A	A	B	A	B	A	B	B	B	B	A	B	A	A	A	B	A	B	A	B	A	A	B	B	A	B	B
Chr6_bin1958	6944403	A	B	B	B	A	A	B	A	A	A	B	B	A	A	A	A	A	A	B	A	B	A	A	B	A	B	A	B	B	B	B	A	B	A	A	A	B	A	B	A	B	A	A	B	B	A	B	B
Chr6_bin1959	7099529	A	B	B	B	A	A	B	A	A	A	B	B	A	A	A	A	A	A	B	A	B	A	A	B	A	B	A	B	B	B	B	A	B	A	A	A	B	A	B	A	B	A	A	B	B	A	B	B
Chr6_bin1960	7156226	A	B	B	B	A	A	B	A	A	A	B	B	A	A	A	A	A	A	B	A	B	A	A	B	A	B	A	B	B	B	B	A	B	B	A	A	B	A	B	A	B	A	A	B	B	A	B	B
Chr6_bin1961	7313543	A	B	B	B	A	A	B	A	A	A	B	B	A	A	A	A	A	A	B	A	B	A	A	B	A	B	A	B	B	B	B	A	B	B	A	A	B	A	B	A	B	A	A	B	B	A	B	B
Chr6_bin1962	7447907	A	B	B	B	A	A	B	A	A	A	B	B	A	A	A	A	A	A	B	A	B	A	A	B	A	B	A	B	B	B	B	A	B	B	A	A	B	A	B	A	B	A	A	B	B	A	B	B
Chr6_bin1963	7455553	A	B	B	B	A	A	B	A	A	A	B	B	A	A	A	A	A	A	B	A	B	A	A	B	A	B	A	B	B	B	B	A	B	B	A	B	B	A	B	A	B	A	A	B	B	A	B	B
Chr6_bin1964	7592201	A	B	B	B	A	A	B	A	A	A	B	B	A	A	A	A	A	A	B	A	B	A	A	B	A	B	A	B	B	B	B	A	B	B	A	B	B	A	B	A	B	A	A	B	B	A	B	B
Chr6_bin1965	7722339	A	B	B	B	A	A	B	A	A	A	B	B	A	A	A	A	A	A	B	A	B	A	A	B	A	B	A	B	B	B	B	A	B	B	A	B	B	A	B	A	B	A	A	B	B	A	B	B
Chr6_bin1966	7839749	A	B	B	B	A	A	B	A	A	A	B	B	A	A	A	A	A	A	B	A	B	A	A	B	A	B	A	B	B	B	B	A	B	B	A	B	B	A	B	A	B	A	A	B	B	A	B	A
Chr6_bin1967	7949746	A	B	B	B	A	A	B	A	A	A	B	B	A	A	A	A	A	A	B	A	B	A	A	B	A	B	A	B	B	B	B	A	B	B	A	B	B	A	B	A	B	A	A	B	B	A	B	A
Chr6_bin1968	8001204	A	B	B	B	A	A	B	A	A	A	B	B	A	A	A	A	A	A	B	A	B	A	A	B	A	B	A	B	B	B	B	A	B	B	A	B	B	A	B	A	B	A	A	B	B	A	B	A
Chr6_bin1969	8144897	A	B	B	B	A	A	B	A	A	A	B	B	A	A	A	A	A	A	B	A	B	A	A	B	A	B	A	B	B	B	B	A	B	B	A	B	B	A	B	A	B	B	A	B	B	A	B	A
Chr6_bin1970	8205266	A	B	B	B	A	A	B	A	A	A	B	B	A	A	A	A	A	A	B	A	B	B	A	B	A	B	A	B	B	B	B	A	B	B	A	B	B	A	B	A	B	B	A	B	B	A	B	A
Chr6_bin1971	8340243	A	B	B	B	A	A	B	A	A	A	B	B	A	A	A	A	A	A	B	A	B	B	A	B	A	B	A	B	B	B	B	A	B	B	A	B	B	A	B	A	B	B	A	B	B	A	B	A
Chr6_bin1972	8435313	A	B	B	B	A	A	B	A	A	A	B	B	A	A	A	A	A	A	B	A	B	B	A	B	A	B	A	B	B	B	B	A	B	B	A	B	B	A	B	A	B	B	B	B	B	A	B	A
Chr6_bin1973	8541950	A	B	B	B	A	A	B	A	A	A	B	B	A	A	A	A	A	A	B	A	B	B	A	B	A	B	A	B	B	B	B	A	B	B	A	B	B	A	B	A	B	B	B	B	B	A	B	A
Chr6_bin1974	8594028	A	B	B	B	A	A	B	A	A	A	B	B	A	A	A	A	A	A	B	A	B	B	A	B	A	B	A	B	B	B	B	A	B	B	A	B	B	A	B	A	B	B	B	B	B	A	B	A
Chr6_bin1975	8720326	A	B	B	B	A	A	B	A	A	A	B	B	A	A	A	A	A	A	B	A	B	B	A	B	A	B	A	B	B	B	B	A	B	B	A	B	B	A	B	A	B	B	B	B	B	A	B	A
Chr6_bin1976	8895286	A	B	B	B	A	A	B	A	A	A	B	B	A	A	A	A	A	A	A	A	B	B	A	B	A	B	A	B	B	B	B	A	B	B	A	B	B	A	B	A	B	B	B	B	B	A	B	A
Chr6_bin1977	8975935	A	B	B	B	A	A	B	A	A	A	B	B	A	A	A	A	A	A	A	A	B	B	A	B	A	B	A	B	B	B	B	A	B	B	A	B	B	A	B	A	B	B	B	B	B	A	B	A
Chr6_bin1978	9203909	A	B	B	B	A	A	B	A	A	A	B	B	A	A	A	A	A	A	A	A	B	B	A	B	A	B	A	B	B	B	B	A	B	B	A	B	B	A	B	A	B	B	B	B	B	A	B	A
Chr6_bin1979	9333252	A	B	B	B	A	A	B	A	A	A	B	B	A	A	A	A	A	A	A	A	B	B	A	B	A	B	A	B	B	B	B	A	B	B	A	B	B	A	B	A	B	B	B	B	B	A	B	A
Chr6_bin1980	9408568	A	B	B	B	A	A	B	A	A	A	B	B	A	A	A	A	A	A	A	A	B	B	A	B	A	B	A	B	B	B	B	A	B	B	A	B	B	A	B	A	B	B	B	B	B	A	B	A
Chr6_bin1981	9849917	A	B	B	B	A	A	B	A	A	A	B	B	A	A	A	A	A	A	A	A	B	B	A	B	A	B	A	B	B	B	B	A	B	B	A	B	B	A	B	A	B	B	B	B	B	A	B	A
Chr6_bin1982	9928065	A	B	B	B	A	A	B	A	A	A	B	B	A	A	A	A	A	A	A	A	B	B	A	B	A	B	A	B	B	B	B	A	B	B	A	B	B	A	B	A	B	B	B	B	B	A	B	A
Chr6_bin1983	10027026	A	B	B	B	A	A	B	A	A	A	B	B	A	A	A	A	A	A	A	A	B	B	A	B	A	B	A	B	B	B	B	A	B	B	A	B	B	A	B	A	B	B	B	B	B	A	B	A
Chr6_bin1984	10115073	A	B	B	B	A	A	B	A	A	A	B	B	A	A	A	A	A	A	A	A	B	B	A	B	A	B	A	B	B	B	A	A	B	B	A	B	B	A	B	A	B	B	B	B	B	A	B	A
Chr6_bin1985	10226614	A	B	B	B	A	A	B	A	A	A	B	B	A	A	A	A	A	A	A	A	B	B	A	B	A	B	A	B	B	B	A	A	B	B	A	B	B	A	B	A	B	B	B	B	B	A	B	A
Chr6_bin1986	10345361	A	B	A	B	A	A	B	A	A	A	B	B	A	A	A	A	A	A	A	A	B	B	A	B	A	B	A	B	B	B	A	A	B	B	A	B	B	A	B	A	B	B	B	B	A	A	A	A
Chr6_bin1987	10389001	A	B	A	B	A	A	B	A	A	A	B	B	A	A	A	A	A	A	A	A	B	B	A	B	A	B	A	B	B	B	A	A	B	B	A	B	B	A	B	A	B	B	B	B	A	A	A	A
Chr6_bin1988	10528674	A	B	A	B	A	A	B	A	A	A	B	B	A	A	A	A	A	A	A	A	B	B	A	B	A	B	A	B	B	B	A	A	B	B	A	B	B	A	B	A	B	B	B	B	A	A	A	A
Chr6_bin1989	10620483	A	B	A	B	A	A	B	A	A	A	B	B	A	A	A	A	A	A	A	A	B	B	A	B	A	B	A	B	B	B	A	A	B	B	A	B	B	A	B	A	B	B	B	B	A	A	A	A
Chr6_bin1990	10714881	A	B	A	B	A	A	B	A	A	A	B	B	A	A	A	A	A	A	A	A	B	B	A	B	A	B	A	B	B	B	A	A	B	B	A	B	B	A	B	A	B	B	B	B	A	B	A	A
Chr6_bin1991	10813504	A	B	A	B	A	A	B	A	A	A	B	B	A	A	A	A	A	A	A	A	B	B	A	B	A	B	A	B	B	B	A	A	B	B	A	B	B	A	B	A	B	B	B	B	A	B	A	A
Chr6_bin1992	10901514	A	B	A	B	A	A	B	A	A	A	B	B	A	A	A	A	A	A	A	A	B	B	A	B	A	B	A	B	B	B	A	A	B	B	A	B	B	A	B	A	B	B	B	B	A	B	A	A
Chr6_bin1993	11142649	A	B	A	B	A	A	B	A	A	A	B	B	A	A	A	A	A	A	A	A	B	B	A	B	A	B	A	B	B	B	A	A	B	B	A	B	B	A	B	A	B	B	B	B	B	B	A	A
Chr6_bin1994	11181770	A	B	A	B	A	A	B	A	A	A	B	B	A	A	A	A	A	A	A	A	B	B	A	B	A	B	A	B	B	B	A	A	B	B	A	B	B	A	B	A	B	B	B	B	B	B	A	A
Chr6_bin1995	11405948	A	B	A	B	A	A	B	A	A	A	B	B	A	A	A	A	A	A	A	A	B	B	A	B	A	B	A	B	B	B	A	A	B	B	A	B	B	A	B	A	B	B	B	B	B	A	A	A
Chr6_bin1996	11466699	A	B	A	B	A	A	B	A	A	A	B	B	A	A	A	A	A	A	A	A	B	B	A	B	A	B	A	B	B	B	A	A	B	B	A	B	B	A	B	A	B	B	B	B	B	A	A	A
Chr6_bin1997	11571712	A	B	A	B	A	A	B	A	A	A	B	B	A	A	A	A	A	A	A	A	B	B	A	B	A	B	A	B	B	B	A	A	B	B	A	B	B	A	B	A	B	B	B	B	B	A	A	A
Chr6_bin1998	11684454	A	B	A	B	A	A	B	A	A	A	B	B	A	A	A	A	A	A	A	A	B	B	A	B	A	B	A	B	B	B	A	A	B	B	A	B	B	A	B	A	B	B	B	B	B	A	A	A
[truncated: 5,599 more rows]
[truncated: 281 more columns]
